# Supplementary material
Source: publisher figshare collection journal article supplement (https://acs.figshare.com/ndownloader/files/3613884)
Supplement: Supplementary file 1 [file 3613884]

 
data_erj17 
  
_audit_creation_method            SHELXL-2014 
_chemical_name_systematic 
; 
 ? 
; 
_chemical_name_common             ? 
_chemical_melting_point           ? 
_chemical_formula_moiety          ? 
_chemical_formula_sum 
 'C28 H25 N O5' 
_chemical_formula_weight          455.49 
  
loop_ 
 _atom_type_symbol 
 _atom_type_description 
 _atom_type_scat_dispersion_real 
 _atom_type_scat_dispersion_imag 
 _atom_type_scat_source 
 'C'  'C'   0.0033   0.0016 
 'International Tables Vol C Tables 4.2.6.8 and 6.1.1.4' 
 'H'  'H'   0.0000   0.0000 
 'International Tables Vol C Tables 4.2.6.8 and 6.1.1.4' 
 'N'  'N'   0.0061   0.0033 
 'International Tables Vol C Tables 4.2.6.8 and 6.1.1.4' 
 'O'  'O'   0.0106   0.0060 
 'International Tables Vol C Tables 4.2.6.8 and 6.1.1.4' 
  
_space_group_crystal_system       monoclinic 
_space_group_IT_number            14 
_space_group_name_H-M_alt         'P 21/c' 
_space_group_name_Hall            '-P 2ybc' 
  
_shelx_space_group_comment 
; 
The symmetry employed for this shelxl refinement is uniquely defined 
by the following loop, which should always be used as a source of 
symmetry information in preference to the above space-group names. 
They are only intended as comments. 
; 
  
loop_ 
 _space_group_symop_operation_xyz 
 'x, y, z' 
 '-x, y+1/2, -z+1/2' 
 '-x, -y, -z' 
 'x, -y-1/2, z-1/2' 
  
_cell_length_a                    16.6860(8) 
_cell_length_b                    11.0565(5) 
_cell_length_c                    12.9454(6) 
_cell_angle_alpha                 90 
_cell_angle_beta                  105.5145(6) 
_cell_angle_gamma                 90 
_cell_volume                      2301.26(19) 
_cell_formula_units_Z             4 
_cell_measurement_temperature     88(2) 
_cell_measurement_reflns_used     8416 
_cell_measurement_theta_min       2.24 
_cell_measurement_theta_max       28.53 
  
_exptl_crystal_description        plate 
_exptl_crystal_colour             colorless 
_exptl_crystal_density_meas       not_measured 
_exptl_crystal_density_method     not_measured 
_exptl_crystal_density_diffrn     1.315 
_exptl_crystal_F_000              960 
_exptl_transmission_factor_min    ? 
_exptl_transmission_factor_max    ? 
_exptl_crystal_size_max           0.213 
_exptl_crystal_size_mid           0.173 
_exptl_crystal_size_min           0.078 
_exptl_absorpt_coefficient_mu     0.090 
_shelx_estimated_absorpt_T_min    0.981 
_shelx_estimated_absorpt_T_max    0.993 
_exptl_absorpt_correction_type    multi-scan 
_exptl_absorpt_correction_T_min   0.8215 
_exptl_absorpt_correction_T_max   0.8621 
_exptl_absorpt_process_details    'Bruker SADABS 2012/1' 
  
_exptl_special_details 
; 
 ? 
; 
  
_diffrn_ambient_temperature       88(2) 
_diffrn_radiation_wavelength      0.71073 
_diffrn_radiation_type            MoK\a 
_diffrn_source                    'fine-focus sealed tube' 
_diffrn_measurement_device_type   'Bruker SMART APEX II CCD' 
_diffrn_measurement_method        '\f and \w scans' 
_diffrn_detector_area_resol_mean  ? 
_diffrn_reflns_number             26185 
_diffrn_reflns_av_unetI/netI      0.0231 
_diffrn_reflns_av_R_equivalents   0.0307 
_diffrn_reflns_limit_h_min        -21 
_diffrn_reflns_limit_h_max        21 
_diffrn_reflns_limit_k_min        -14 
_diffrn_reflns_limit_k_max        14 
_diffrn_reflns_limit_l_min        -16 
_diffrn_reflns_limit_l_max        16 
_diffrn_reflns_theta_min          2.236 
_diffrn_reflns_theta_max          27.103 
_diffrn_reflns_theta_full         25.242 
_diffrn_measured_fraction_theta_max   1.000 
_diffrn_measured_fraction_theta_full  1.000 
_diffrn_reflns_Laue_measured_fraction_max    1.000 
_diffrn_reflns_Laue_measured_fraction_full   1.000 
_diffrn_reflns_point_group_measured_fraction_max   1.000 
_diffrn_reflns_point_group_measured_fraction_full  1.000 
_reflns_number_total              5086 
_reflns_number_gt                 4091 
_reflns_threshold_expression      'I > 2\s(I)' 
_reflns_Friedel_coverage          0.000 
_reflns_Friedel_fraction_max      . 
_reflns_Friedel_fraction_full     . 
  
_reflns_special_details 
; 
 Reflections were merged by SHELXL according to the crystal 
 class for the calculation of statistics and refinement. 
  
 _reflns_Friedel_fraction is defined as the number of unique 
 Friedel pairs measured divided by the number that would be 
 possible theoretically, ignoring centric projections and 
 systematic absences. 
; 
  
_computing_data_collection        'Bruker APEX2 2014.1-1, 2014' 
_computing_cell_refinement        'Bruker SAINT 8.34a, 2013' 
_computing_data_reduction         'Bruker SAINT 8.34a, 2013' 
_computing_structure_solution     'Bruker SHELXTL 2013/1' 
_computing_structure_refinement   'SHELXL-2014 (Sheldrick, 2014)' 
_computing_molecular_graphics     'Bruker SHELXTL' 
_computing_publication_material   'Bruker SHELXTL' 
  
_refine_special_details 
; 
 ? 
; 
_refine_ls_structure_factor_coef  Fsqd 
_refine_ls_matrix_type            full 
_refine_ls_weighting_scheme       calc 
_refine_ls_weighting_details 
'w=1/[\s^2^(Fo^2^)+(0.0454P)^2^+1.2098P] where P=(Fo^2^+2Fc^2^)/3' 
_atom_sites_solution_primary      direct 
_atom_sites_solution_secondary    difmap 
_atom_sites_solution_hydrogens    difmap 
_refine_ls_hydrogen_treatment     refall 
_refine_ls_extinction_method      none 
_refine_ls_extinction_coef        ? 
_refine_ls_number_reflns          5086 
_refine_ls_number_parameters      407 
_refine_ls_number_restraints      0 
_refine_ls_R_factor_all           0.0564 
_refine_ls_R_factor_gt            0.0422 
_refine_ls_wR_factor_ref          0.1085 
_refine_ls_wR_factor_gt           0.1007 
_refine_ls_goodness_of_fit_ref    1.033 
_refine_ls_restrained_S_all       1.033 
_refine_ls_shift/su_max           0.000 
_refine_ls_shift/su_mean          0.000 
  
loop_ 
 _atom_site_label 
 _atom_site_type_symbol 
 _atom_site_fract_x 
 _atom_site_fract_y 
 _atom_site_fract_z 
 _atom_site_U_iso_or_equiv 
 _atom_site_adp_type 
 _atom_site_occupancy 
 _atom_site_site_symmetry_order 
 _atom_site_calc_flag 
 _atom_site_refinement_flags_posn 
 _atom_site_refinement_flags_adp 
 _atom_site_refinement_flags_occupancy 
 _atom_site_disorder_assembly 
 _atom_site_disorder_group 
O1 O 0.35225(6) 0.53547(9) 0.03492(8) 0.0217(2) Uani 1 1 d . . . . . 
O2 O 0.32137(7) 0.37950(10) 0.12942(8) 0.0246(2) Uani 1 1 d . . . . . 
O3 O 0.36786(6) 0.80430(9) 0.03120(8) 0.0206(2) Uani 1 1 d . . . . . 
O4 O 0.51363(7) 0.15292(10) -0.27213(8) 0.0250(2) Uani 1 1 d . . . . . 
O5 O 0.49182(7) 0.00044(9) -0.17808(9) 0.0285(3) Uani 1 1 d . . . . . 
N1 N 0.48611(8) 0.10847(11) -0.20172(9) 0.0209(3) Uani 1 1 d . . . . . 
C1 C 0.32932(10) 0.61748(14) 0.10949(12) 0.0232(3) Uani 1 1 d . . . . . 
C2 C 0.30231(9) 0.73788(13) 0.05580(11) 0.0198(3) Uani 1 1 d . . . . . 
C3 C 0.26801(10) 0.81061(14) 0.13449(12) 0.0224(3) Uani 1 1 d . . . . . 
C4 C 0.24155(9) 0.94017(13) 0.10010(11) 0.0191(3) Uani 1 1 d . . . . . 
C5 C 0.21094(9) 1.00673(14) 0.18554(11) 0.0206(3) Uani 1 1 d . . . . . 
C6 C 0.18044(9) 0.94792(14) 0.26093(12) 0.0223(3) Uani 1 1 d . . . . . 
C7 C 0.15353(9) 1.01222(14) 0.34075(11) 0.0218(3) Uani 1 1 d . . . . . 
C8 C 0.12272(10) 0.95203(17) 0.41933(12) 0.0272(3) Uani 1 1 d . . . . . 
C9 C 0.09865(10) 1.01674(19) 0.49567(13) 0.0326(4) Uani 1 1 d . . . . . 
C10 C 0.10244(11) 1.14385(19) 0.49653(13) 0.0357(4) Uani 1 1 d . . . . . 
C11 C 0.13123(10) 1.20479(17) 0.42173(14) 0.0322(4) Uani 1 1 d . . . . . 
C12 C 0.15824(9) 1.14026(15) 0.34191(12) 0.0233(3) Uani 1 1 d . . . . . 
C13 C 0.18944(10) 1.19901(15) 0.26320(13) 0.0261(3) Uani 1 1 d . . . . . 
C14 C 0.21491(9) 1.13433(14) 0.18817(12) 0.0231(3) Uani 1 1 d . . . . . 
C15 C 0.17751(9) 0.94014(13) -0.00961(11) 0.0210(3) Uani 1 1 d . . . . . 
C16 C 0.09393(10) 0.91298(15) -0.02138(12) 0.0254(3) Uani 1 1 d . . . . . 
C17 C 0.03781(10) 0.90698(16) -0.12258(13) 0.0292(4) Uani 1 1 d . . . . . 
C18 C 0.06509(10) 0.92826(16) -0.21330(13) 0.0288(4) Uani 1 1 d . . . . . 
C19 C 0.14801(10) 0.95558(15) -0.20231(12) 0.0276(3) Uani 1 1 d . . . . . 
C20 C 0.20370(10) 0.96172(14) -0.10112(12) 0.0242(3) Uani 1 1 d . . . . . 
C21 C 0.38496(11) 0.76868(15) -0.06680(12) 0.0246(3) Uani 1 1 d . . . . . 
C22 C 0.34670(9) 0.41757(13) 0.05657(11) 0.0183(3) Uani 1 1 d . . . . . 
C23 C 0.37812(8) 0.33925(13) -0.01796(11) 0.0176(3) Uani 1 1 d . . . . . 
C24 C 0.40580(9) 0.38642(13) -0.10217(11) 0.0200(3) Uani 1 1 d . . . . . 
C25 C 0.43933(9) 0.31054(13) -0.16478(11) 0.0198(3) Uani 1 1 d . . . . . 
C26 C 0.44470(9) 0.18827(13) -0.14094(11) 0.0183(3) Uani 1 1 d . . . . . 
C27 C 0.41602(9) 0.13849(13) -0.05952(12) 0.0200(3) Uani 1 1 d . . . . . 
C28 C 0.38252(9) 0.21523(13) 0.00223(12) 0.0202(3) Uani 1 1 d . . . . . 
H1A H 0.3793(10) 0.6293(15) 0.1708(13) 0.021(4) Uiso 1 1 d . . . . . 
H1B H 0.2835(12) 0.5813(17) 0.1326(14) 0.034(5) Uiso 1 1 d . . . . . 
H2A H 0.2591(10) 0.7243(14) -0.0129(13) 0.021(4) Uiso 1 1 d . . . . . 
H3A H 0.3104(11) 0.8167(16) 0.2027(14) 0.027(4) Uiso 1 1 d . . . . . 
H3B H 0.2147(11) 0.7675(15) 0.1434(13) 0.026(4) Uiso 1 1 d . . . . . 
H4A H 0.2955(10) 0.9848(14) 0.0924(12) 0.018(4) Uiso 1 1 d . . . . . 
H6A H 0.1751(11) 0.8642(17) 0.2637(13) 0.027(4) Uiso 1 1 d . . . . . 
H8A H 0.1182(12) 0.8629(19) 0.4154(15) 0.042(6) Uiso 1 1 d . . . . . 
H9A H 0.0774(12) 0.9732(18) 0.5486(16) 0.040(5) Uiso 1 1 d . . . . . 
H10A H 0.0819(13) 1.1861(19) 0.5501(17) 0.047(6) Uiso 1 1 d . . . . . 
H11A H 0.1322(12) 1.293(2) 0.4219(16) 0.045(6) Uiso 1 1 d . . . . . 
H13A H 0.1935(12) 1.287(2) 0.2633(15) 0.045(6) Uiso 1 1 d . . . . . 
H14A H 0.2359(11) 1.1768(16) 0.1346(15) 0.032(5) Uiso 1 1 d . . . . . 
H16A H 0.0748(11) 0.8955(16) 0.0419(14) 0.028(4) Uiso 1 1 d . . . . . 
H17A H -0.0197(12) 0.8877(17) -0.1295(14) 0.032(5) Uiso 1 1 d . . . . . 
H18A H 0.0254(12) 0.9249(17) -0.2822(15) 0.035(5) Uiso 1 1 d . . . . . 
H19A H 0.1681(12) 0.9719(17) -0.2653(16) 0.038(5) Uiso 1 1 d . . . . . 
H20A H 0.2628(12) 0.9829(16) -0.0937(14) 0.031(5) Uiso 1 1 d . . . . . 
H21A H 0.4167(11) 0.8323(17) -0.0871(14) 0.032(5) Uiso 1 1 d . . . . . 
H21B H 0.3339(13) 0.7599(18) -0.1189(16) 0.043(6) Uiso 1 1 d . . . . . 
H21C H 0.4180(12) 0.6937(19) -0.0569(15) 0.038(5) Uiso 1 1 d . . . . . 
H24A H 0.4035(10) 0.4691(16) -0.1164(13) 0.022(4) Uiso 1 1 d . . . . . 
H25A H 0.4590(10) 0.3410(15) -0.2211(14) 0.024(4) Uiso 1 1 d . . . . . 
H27A H 0.4210(11) 0.0552(17) -0.0443(13) 0.027(4) Uiso 1 1 d . . . . . 
H28A H 0.3643(10) 0.1842(16) 0.0600(14) 0.025(4) Uiso 1 1 d . . . . . 
  
loop_ 
 _atom_site_aniso_label 
 _atom_site_aniso_U_11 
 _atom_site_aniso_U_22 
 _atom_site_aniso_U_33 
 _atom_site_aniso_U_23 
 _atom_site_aniso_U_13 
 _atom_site_aniso_U_12 
O1 0.0299(6) 0.0164(5) 0.0229(5) 0.0005(4) 0.0139(4) 0.0039(4) 
O2 0.0306(6) 0.0237(6) 0.0238(5) 0.0012(4) 0.0145(5) -0.0003(4) 
O3 0.0230(5) 0.0223(5) 0.0170(5) -0.0038(4) 0.0063(4) 0.0002(4) 
O4 0.0304(6) 0.0287(6) 0.0188(5) -0.0004(4) 0.0116(4) 0.0000(5) 
O5 0.0438(7) 0.0167(5) 0.0288(6) -0.0024(4) 0.0162(5) 0.0020(5) 
N1 0.0245(6) 0.0209(6) 0.0173(6) -0.0025(5) 0.0058(5) -0.0008(5) 
C1 0.0308(8) 0.0215(8) 0.0204(7) 0.0004(6) 0.0121(6) 0.0070(6) 
C2 0.0228(7) 0.0204(7) 0.0170(7) 0.0006(6) 0.0064(6) 0.0037(6) 
C3 0.0266(8) 0.0232(8) 0.0188(7) 0.0023(6) 0.0085(6) 0.0067(6) 
C4 0.0211(7) 0.0201(7) 0.0174(7) 0.0018(5) 0.0073(6) 0.0023(6) 
C5 0.0175(7) 0.0292(8) 0.0145(7) -0.0008(6) 0.0035(5) 0.0052(6) 
C6 0.0230(7) 0.0226(8) 0.0211(7) 0.0010(6) 0.0055(6) 0.0054(6) 
C7 0.0168(7) 0.0329(8) 0.0145(7) 0.0001(6) 0.0022(5) 0.0045(6) 
C8 0.0207(7) 0.0393(10) 0.0205(7) 0.0056(7) 0.0036(6) 0.0051(7) 
C9 0.0207(8) 0.0603(12) 0.0167(7) 0.0018(8) 0.0051(6) 0.0003(8) 
C10 0.0264(8) 0.0598(12) 0.0230(8) -0.0183(8) 0.0104(7) -0.0031(8) 
C11 0.0284(9) 0.0378(10) 0.0306(9) -0.0168(7) 0.0080(7) -0.0047(7) 
C12 0.0171(7) 0.0329(8) 0.0193(7) -0.0074(6) 0.0037(6) -0.0007(6) 
C13 0.0241(8) 0.0271(8) 0.0272(8) -0.0041(6) 0.0069(6) -0.0018(6) 
C14 0.0204(7) 0.0279(8) 0.0214(7) 0.0015(6) 0.0064(6) 0.0011(6) 
C15 0.0241(7) 0.0203(7) 0.0185(7) -0.0001(6) 0.0053(6) 0.0064(6) 
C16 0.0277(8) 0.0302(8) 0.0203(7) 0.0013(6) 0.0100(6) 0.0043(6) 
C17 0.0230(8) 0.0382(9) 0.0264(8) -0.0018(7) 0.0064(6) 0.0030(7) 
C18 0.0257(8) 0.0396(10) 0.0183(7) -0.0008(7) 0.0010(6) 0.0054(7) 
C19 0.0299(8) 0.0347(9) 0.0182(7) 0.0038(7) 0.0064(6) 0.0062(7) 
C20 0.0223(8) 0.0286(8) 0.0219(7) 0.0016(6) 0.0061(6) 0.0040(6) 
C21 0.0300(8) 0.0267(8) 0.0198(7) -0.0037(6) 0.0112(7) -0.0052(7) 
C22 0.0172(7) 0.0187(7) 0.0189(7) 0.0010(6) 0.0045(5) 0.0001(5) 
C23 0.0164(7) 0.0186(7) 0.0178(7) -0.0004(5) 0.0043(5) -0.0003(5) 
C24 0.0234(7) 0.0165(7) 0.0200(7) 0.0026(6) 0.0057(6) 0.0006(6) 
C25 0.0230(7) 0.0217(7) 0.0157(7) 0.0023(6) 0.0069(6) -0.0008(6) 
C26 0.0199(7) 0.0190(7) 0.0157(6) -0.0029(5) 0.0044(5) -0.0007(5) 
C27 0.0235(7) 0.0154(7) 0.0213(7) 0.0002(6) 0.0066(6) -0.0023(5) 
C28 0.0226(7) 0.0203(7) 0.0196(7) 0.0013(6) 0.0091(6) -0.0030(6) 
  
_geom_special_details 
; 
 All esds (except the esd in the dihedral angle between two l.s. planes) 
 are estimated using the full covariance matrix.  The cell esds are taken 
 into account individually in the estimation of esds in distances, angles 
 and torsion angles; correlations between esds in cell parameters are only 
 used when they are defined by crystal symmetry.  An approximate (isotropic) 
 treatment of cell esds is used for estimating esds involving l.s. planes. 
; 
  
loop_ 
 _geom_bond_atom_site_label_1 
 _geom_bond_atom_site_label_2 
 _geom_bond_distance 
 _geom_bond_site_symmetry_2 
 _geom_bond_publ_flag 
O1 C22 1.3418(17) . ? 
O1 C1 1.4484(17) . ? 
O2 C22 1.2077(17) . ? 
O3 C2 1.4225(18) . ? 
O3 C21 1.4282(17) . ? 
O4 N1 1.2277(15) . ? 
O5 N1 1.2304(16) . ? 
N1 C26 1.4717(18) . ? 
C1 C2 1.514(2) . ? 
C2 C3 1.5243(19) . ? 
C3 C4 1.530(2) . ? 
C4 C5 1.5257(19) . ? 
C4 C15 1.5321(19) . ? 
C5 C6 1.378(2) . ? 
C5 C14 1.412(2) . ? 
C6 C7 1.422(2) . ? 
C7 C12 1.418(2) . ? 
C7 C8 1.422(2) . ? 
C8 C9 1.365(2) . ? 
C9 C10 1.407(3) . ? 
C10 C11 1.368(3) . ? 
C11 C12 1.424(2) . ? 
C12 C13 1.420(2) . ? 
C13 C14 1.362(2) . ? 
C15 C20 1.389(2) . ? 
C15 C16 1.395(2) . ? 
C16 C17 1.393(2) . ? 
C17 C18 1.388(2) . ? 
C18 C19 1.386(2) . ? 
C19 C20 1.390(2) . ? 
C22 C23 1.4920(19) . ? 
C23 C24 1.3939(19) . ? 
C23 C28 1.394(2) . ? 
C24 C25 1.384(2) . ? 
C25 C26 1.384(2) . ? 
C26 C27 1.383(2) . ? 
C27 C28 1.382(2) . ? 
  
loop_ 
 _geom_angle_atom_site_label_1 
 _geom_angle_atom_site_label_2 
 _geom_angle_atom_site_label_3 
 _geom_angle 
 _geom_angle_site_symmetry_1 
 _geom_angle_site_symmetry_3 
 _geom_angle_publ_flag 
C22 O1 C1 115.07(11) . . ? 
C2 O3 C21 113.88(11) . . ? 
O4 N1 O5 123.63(12) . . ? 
O4 N1 C26 118.64(12) . . ? 
O5 N1 C26 117.72(12) . . ? 
O1 C1 C2 110.11(12) . . ? 
O3 C2 C1 113.86(12) . . ? 
O3 C2 C3 109.02(12) . . ? 
C1 C2 C3 106.02(12) . . ? 
C2 C3 C4 115.48(12) . . ? 
C5 C4 C3 111.55(12) . . ? 
C5 C4 C15 112.74(12) . . ? 
C3 C4 C15 110.18(12) . . ? 
C6 C5 C14 118.55(13) . . ? 
C6 C5 C4 122.98(14) . . ? 
C14 C5 C4 118.46(13) . . ? 
C5 C6 C7 121.78(15) . . ? 
C12 C7 C8 119.30(14) . . ? 
C12 C7 C6 118.64(14) . . ? 
C8 C7 C6 122.05(15) . . ? 
C9 C8 C7 120.36(17) . . ? 
C8 C9 C10 120.55(16) . . ? 
C11 C10 C9 120.66(16) . . ? 
C10 C11 C12 120.39(17) . . ? 
C7 C12 C13 118.64(14) . . ? 
C7 C12 C11 118.72(15) . . ? 
C13 C12 C11 122.64(16) . . ? 
C14 C13 C12 121.05(15) . . ? 
C13 C14 C5 121.33(15) . . ? 
C20 C15 C16 118.52(13) . . ? 
C20 C15 C4 119.36(13) . . ? 
C16 C15 C4 122.04(13) . . ? 
C17 C16 C15 120.92(14) . . ? 
C18 C17 C16 119.83(15) . . ? 
C19 C18 C17 119.61(14) . . ? 
C18 C19 C20 120.32(15) . . ? 
C15 C20 C19 120.79(15) . . ? 
O2 C22 O1 124.04(13) . . ? 
O2 C22 C23 124.03(13) . . ? 
O1 C22 C23 111.90(12) . . ? 
C24 C23 C28 120.18(13) . . ? 
C24 C23 C22 122.40(13) . . ? 
C28 C23 C22 117.36(12) . . ? 
C25 C24 C23 120.10(14) . . ? 
C26 C25 C24 118.26(13) . . ? 
C27 C26 C25 122.94(13) . . ? 
C27 C26 N1 118.46(13) . . ? 
C25 C26 N1 118.55(12) . . ? 
C28 C27 C26 118.18(13) . . ? 
C27 C28 C23 120.30(13) . . ? 
  
_refine_diff_density_max    0.425 
_refine_diff_density_min   -0.223 
_refine_diff_density_rms    0.043 
  
_shelxl_version_number 2014-2 
  
_shelx_res_file 
; 
TITL erj17 in P2(1)/c 
CELL 0.71073  16.68600  11.05650  12.94540  90.0000 105.5145  90.0000 
ZERR    4.00   0.00080   0.00050   0.00060   0.0000   0.0006   0.0000 
LATT  1 
SYMM -X, 0.5+Y, 0.5-Z 
SFAC C H N O 
UNIT 112 100 4 20 
TEMP -185.000 
SIZE 0.078 0.173 0.213 
  
rem David Dawson partial data set ccd1 (DDD cis) 
rem APEX2 2014.1-1, SAINT 8.34a, SADABS 2012/1, SHELXTL 2014/2 
  
rem may need renumbering 6/2/14 
  
OMIT 1 0 0 
SHEL 100 0.78 
  
L.S. 12 
acta 
  
WGHT    0.045400    1.209800 
FVAR       0.08642 
O1    4    0.352248    0.535468    0.034921    11.00000    0.02988    0.01643 = 
         0.02286    0.00052    0.01388    0.00393 
O2    4    0.321372    0.379498    0.129424    11.00000    0.03058    0.02369 = 
         0.02378    0.00118    0.01454   -0.00030 
O3    4    0.367858    0.804299    0.031199    11.00000    0.02303    0.02231 = 
         0.01703   -0.00379    0.00635    0.00021 
O4    4    0.513631    0.152924   -0.272133    11.00000    0.03044    0.02869 = 
         0.01881   -0.00036    0.01163   -0.00003 
O5    4    0.491818    0.000439   -0.178075    11.00000    0.04379    0.01674 = 
         0.02885   -0.00242    0.01622    0.00198 
N1    3    0.486107    0.108471   -0.201721    11.00000    0.02447    0.02094 = 
         0.01727   -0.00248    0.00580   -0.00082 
C1    1    0.329324    0.617478    0.109492    11.00000    0.03075    0.02147 = 
         0.02040    0.00036    0.01206    0.00703 
C2    1    0.302305    0.737882    0.055803    11.00000    0.02277    0.02038 = 
         0.01697    0.00064    0.00639    0.00375 
C3    1    0.268013    0.810605    0.134493    11.00000    0.02661    0.02315 = 
         0.01881    0.00229    0.00847    0.00669 
C4    1    0.241547    0.940173    0.100105    11.00000    0.02114    0.02009 = 
         0.01744    0.00180    0.00728    0.00234 
C5    1    0.210936    1.006728    0.185540    11.00000    0.01747    0.02920 = 
         0.01455   -0.00075    0.00348    0.00516 
C6    1    0.180444    0.947922    0.260928    11.00000    0.02296    0.02255 = 
         0.02108    0.00103    0.00548    0.00543 
C7    1    0.153528    1.012221    0.340754    11.00000    0.01682    0.03285 = 
         0.01447    0.00015    0.00223    0.00446 
C8    1    0.122722    0.952030    0.419331    11.00000    0.02066    0.03927 = 
         0.02049    0.00556    0.00363    0.00507 
C9    1    0.098652    1.016740    0.495671    11.00000    0.02073    0.06026 = 
         0.01673    0.00181    0.00505    0.00031 
C10   1    0.102435    1.143854    0.496532    11.00000    0.02636    0.05984 = 
         0.02297   -0.01832    0.01043   -0.00306 
C11   1    0.131231    1.204792    0.421729    11.00000    0.02844    0.03775 = 
         0.03060   -0.01682    0.00803   -0.00466 
C12   1    0.158236    1.140258    0.341911    11.00000    0.01712    0.03289 = 
         0.01930   -0.00737    0.00366   -0.00072 
C13   1    0.189440    1.199011    0.263196    11.00000    0.02406    0.02711 = 
         0.02718   -0.00413    0.00695   -0.00177 
C14   1    0.214913    1.134333    0.188172    11.00000    0.02044    0.02789 = 
         0.02144    0.00154    0.00642    0.00108 
C15   1    0.177511    0.940138   -0.009614    11.00000    0.02405    0.02026 = 
         0.01852   -0.00011    0.00531    0.00645 
C16   1    0.093926    0.912977   -0.021385    11.00000    0.02767    0.03017 = 
         0.02031    0.00130    0.01003    0.00430 
C17   1    0.037814    0.906984   -0.122579    11.00000    0.02302    0.03817 = 
         0.02642   -0.00178    0.00638    0.00296 
C18   1    0.065087    0.928259   -0.213304    11.00000    0.02570    0.03962 = 
         0.01826   -0.00082    0.00099    0.00537 
C19   1    0.148011    0.955578   -0.202305    11.00000    0.02987    0.03467 = 
         0.01824    0.00384    0.00642    0.00616 
C20   1    0.203702    0.961717   -0.101123    11.00000    0.02230    0.02861 = 
         0.02193    0.00162    0.00610    0.00402 
C21   1    0.384963    0.768677   -0.066803    11.00000    0.02996    0.02668 = 
         0.01983   -0.00367    0.01123   -0.00521 
C22   1    0.346696    0.417566    0.056566    11.00000    0.01717    0.01870 = 
         0.01888    0.00104    0.00445    0.00012 
C23   1    0.378120    0.339253   -0.017961    11.00000    0.01639    0.01859 = 
         0.01776   -0.00036    0.00425   -0.00027 
C24   1    0.405802    0.386416   -0.102169    11.00000    0.02338    0.01650 = 
         0.02001    0.00261    0.00572    0.00060 
C25   1    0.439333    0.310540   -0.164782    11.00000    0.02298    0.02169 = 
         0.01570    0.00225    0.00695   -0.00083 
C26   1    0.444696    0.188269   -0.140939    11.00000    0.01994    0.01903 = 
         0.01566   -0.00285    0.00443   -0.00067 
C27   1    0.416019    0.138487   -0.059522    11.00000    0.02347    0.01541 = 
         0.02133    0.00022    0.00657   -0.00231 
C28   1    0.382520    0.215232    0.002226    11.00000    0.02264    0.02028 = 
         0.01955    0.00132    0.00908   -0.00296 
H1A   2    0.379254    0.629251    0.170775    11.00000    0.02073 
H1B   2    0.283535    0.581297    0.132610    11.00000    0.03415 
H2A   2    0.259071    0.724266   -0.012862    11.00000    0.02124 
H3A   2    0.310379    0.816721    0.202683    11.00000    0.02680 
H3B   2    0.214660    0.767474    0.143355    11.00000    0.02591 
H4A   2    0.295522    0.984823    0.092400    11.00000    0.01840 
H6A   2    0.175114    0.864225    0.263701    11.00000    0.02659 
H8A   2    0.118247    0.862947    0.415405    11.00000    0.04202 
H9A   2    0.077364    0.973204    0.548601    11.00000    0.04014 
H10A  2    0.081901    1.186053    0.550128    11.00000    0.04708 
H11A  2    0.132213    1.293098    0.421859    11.00000    0.04455 
H13A  2    0.193533    1.287146    0.263336    11.00000    0.04459 
H14A  2    0.235886    1.176772    0.134581    11.00000    0.03151 
H16A  2    0.074840    0.895550    0.041866    11.00000    0.02810 
H17A  2   -0.019660    0.887681   -0.129457    11.00000    0.03245 
H18A  2    0.025400    0.924876   -0.282212    11.00000    0.03487 
H19A  2    0.168053    0.971890   -0.265335    11.00000    0.03837 
H20A  2    0.262783    0.982853   -0.093675    11.00000    0.03110 
H21A  2    0.416693    0.832343   -0.087075    11.00000    0.03153 
H21B  2    0.333920    0.759939   -0.118898    11.00000    0.04336 
H21C  2    0.418045    0.693678   -0.056930    11.00000    0.03837 
H24A  2    0.403483    0.469095   -0.116382    11.00000    0.02229 
H25A  2    0.459036    0.340985   -0.221136    11.00000    0.02421 
H27A  2    0.420984    0.055172   -0.044301    11.00000    0.02659 
H28A  2    0.364292    0.184224    0.059963    11.00000    0.02489 
HKLF 4 
  
REM  erj17 in P2(1)/c 
REM R1 =  0.0422 for    4091 Fo > 4sig(Fo)  and  0.0564 for all    5086 data 
REM    407 parameters refined using      0 restraints 
  
END 
  
WGHT      0.0454      1.2099 
  
REM Highest difference peak  0.425,  deepest hole -0.223,  1-sigma level  0.043 
Q1    1   0.1475  0.8829 -0.0037  11.00000  0.05    0.43 
Q2    1   0.2113  0.8634  0.1121  11.00000  0.05    0.40 
Q3    1   0.1763  0.9523  0.1956  11.00000  0.05    0.38 
Q4    1   0.1924  1.0738  0.1716  11.00000  0.05    0.37 
Q5    1   0.2969  0.8737  0.1222  11.00000  0.05    0.32 
Q6    1   0.3658  0.3779  0.0174  11.00000  0.05    0.31 
Q7    1   0.3136  0.6772  0.0727  11.00000  0.05    0.30 
Q8    1   0.1842  0.9173 -0.0673  11.00000  0.05    0.30 
Q9    1   0.2191  0.9769  0.1412  11.00000  0.05    0.29 
Q10   1   0.4561  0.1479 -0.1724  11.00000  0.05    0.27 
Q11   1   0.2824  0.7772  0.0875  11.00000  0.05    0.27 
Q12   1   0.3878  0.2833 -0.0009  11.00000  0.05    0.25 
Q13   1   0.1598  1.0752  0.3441  11.00000  0.05    0.24 
Q14   1   0.3792  0.3580 -0.0678  11.00000  0.05    0.24 
Q15   1   0.3976  0.3621 -0.0485  11.00000  0.05    0.24 
Q16   1   0.1557  1.1663  0.2945  11.00000  0.05    0.24 
Q17   1   0.4259  0.2381 -0.1664  11.00000  0.05    0.24 
Q18   1   0.4157  0.1788 -0.0161  11.00000  0.05    0.23 
Q19   1   0.3798  0.1790 -0.0508  11.00000  0.05    0.22 
Q20   1   0.1871  0.9884  0.3167  11.00000  0.05    0.22 
; 
_shelx_res_checksum   90892 
  
_shelx_hkl_file 
; 
   0   0  -1   -0.06    0.01 
   0   0   1   -0.06    0.01 
   0   0   1   -0.05    0.01 
   0   0   2   50.34    0.85 
   0   0  -2   50.64    0.83 
   0   0  -2   50.47    0.84 
   0   0   2   50.63    0.80 
   0   0   3   -0.01    0.02 
   0   0   3    0.00    0.02 
   0   0  -3   -0.03    0.03 
   0   0  -3    0.04    0.02 
   0   0  -4    3.67    0.12 
   0   0  -4    3.89    0.10 
   0   0   4    3.91    0.12 
   0   0   4    3.77    0.09 
   0   0  -5   -0.05    0.02 
   0   0  -5   -0.05    0.03 
   0   0   5    0.00    0.03 
   0   0   5    0.00    0.02 
   0   0  -6    6.72    0.16 
   0   0  -6    6.22    0.19 
   0   0   6    6.84    0.15 
   0   0   6    6.74    0.19 
   0   0  -7   -0.04    0.04 
   0   0   7   -0.02    0.02 
   0   0   7    0.04    0.04 
   0   0  -7    0.01    0.03 
   0   0   8    1.57    0.07 
   0   0   8    1.69    0.11 
   0   0  -8    1.50    0.12 
   0   0  -8    1.54    0.09 
   0   0   9    0.04    0.05 
   0   0  -9    0.00    0.04 
   0   0   9   -0.04    0.03 
   0   0  -9    0.09    0.07 
   0   0  10    1.91    0.13 
   0   0 -10    2.12    0.16 
   0   0  11   -0.01    0.05 
   0   0 -11    0.03    0.07 
   0   0  12    0.22    0.08 
   0   0 -12    0.34    0.10 
   0   0  13   -0.04    0.07 
   0   0 -13    0.04    0.09 
   0   0 -14    0.27    0.12 
   0   0  14    0.26    0.09 
   0   0 -15    0.08    0.11 
   0   0  15   -0.03    0.08 
   0   0 -16    0.51    0.15 
   0   0  16    0.52    0.13 
   0   1   0    0.02    0.01 
   0   1   0   -0.01    0.01 
   0  -1   0   -0.02    0.01 
   0   1   1    1.42    0.04 
   0   1   1    1.35    0.04 
   0   1  -1    1.40    0.04 
   0   1   1    1.37    0.04 
   0   1  -1    1.27    0.04 
   0   1   1    1.32    0.04 
   0  -1   1    1.37    0.04 
   0  -1   1    1.33    0.04 
   0   1   2   45.15    0.76 
   0   1   2   46.57    0.73 
   0   1   2   44.52    0.77 
   0   1  -2   45.59    0.76 
   0   1  -2   46.92    0.75 
   0  -1  -2   46.21    0.75 
   0  -1   2   45.59    0.77 
   0  -1   2   45.57    0.74 
   0   1  -3   35.31    0.59 
   0   1  -3   34.48    0.60 
   0   1   3   35.17    0.57 
   0   1   3   34.20    0.60 
   0   1   3   34.45    0.61 
   0  -1  -3   35.54    0.58 
   0  -1   3   34.33    0.61 
   0  -1   3   34.45    0.58 
   0   1  -4    2.99    0.09 
   0   1   4    2.72    0.10 
   0   1   4    2.89    0.08 
   0   1  -4    3.01    0.11 
   0  -1   4    2.95    0.10 
   0  -1  -4    2.88    0.11 
   0  -1  -4    2.92    0.09 
   0  -1   4    2.93    0.09 
   0   1   5   11.12    0.21 
   0   1  -5   11.06    0.25 
   0   1   5   11.03    0.25 
   0   1  -5   11.58    0.23 
   0  -1   5   11.18    0.25 
   0  -1   5   11.04    0.22 
   0  -1  -5   10.71    0.25 
   0  -1  -5   11.07    0.22 
   0   1  -6    0.04    0.04 
   0   1   6    0.01    0.02 
   0   1  -6    0.01    0.03 
   0   1   6    0.03    0.04 
   0  -1   6   -0.02    0.02 
   0  -1   6    0.02    0.03 
   0  -1  -6    0.02    0.03 
   0  -1  -6    0.01    0.04 
   0   1  -7    3.50    0.15 
   0   1   7    4.10    0.11 
   0   1   7    3.81    0.15 
   0   1  -7    4.03    0.12 
   0  -1   7    3.95    0.12 
   0  -1   7    3.84    0.14 
   0  -1  -7    4.12    0.15 
   0  -1  -7    4.12    0.12 
   0   1   8    9.24    0.20 
   0   1  -8    8.89    0.25 
   0   1   8    9.02    0.26 
   0   1  -8    9.27    0.22 
   0  -1   8    9.04    0.25 
   0  -1  -8    9.15    0.22 
   0  -1   8    9.42    0.21 
   0  -1  -8    9.24    0.26 
   0   1  -9    0.07    0.05 
   0   1   9    0.00    0.05 
   0   1  -9    0.12    0.07 
   0   1   9    0.11    0.03 
   0  -1  -9    0.02    0.06 
   0  -1   9    0.04    0.05 
   0  -1  -9    0.06    0.04 
   0  -1   9    0.07    0.04 
   0   1 -10   -0.02    0.07 
   0   1  10   -0.08    0.05 
   0  -1  10   -0.04    0.05 
   0  -1 -10   -0.04    0.07 
   0   1 -11    4.07    0.21 
   0   1  11    4.29    0.20 
   0  -1  11    4.51    0.20 
   0  -1 -11    4.29    0.21 
   0   1 -12    0.14    0.09 
   0   1  12    0.00    0.06 
   0  -1  12    0.00    0.06 
   0  -1 -12    0.21    0.09 
   0   1  13    8.00    0.30 
   0   1 -13    8.29    0.32 
   0  -1  13    7.45    0.29 
   0  -1 -13    8.06    0.31 
   0   1 -14    0.54    0.12 
   0   1  14    0.52    0.11 
   0  -1 -14    0.43    0.12 
   0  -1  14    0.60    0.11 
   0   1 -15    2.08    0.21 
   0   1  15    1.81    0.18 
   0  -1 -15    2.29    0.22 
   0  -1  15    1.81    0.18 
   0   1  16    0.07    0.09 
   0   1 -16    0.04    0.12 
   0  -1  16    0.02    0.08 
   0  -1 -16    0.06    0.12 
   0   2   0   30.55    0.53 
   0   2   0   31.70    0.53 
   0  -2   0   32.30    0.53 
   0  -2   0   31.88    0.53 
   0   2   1    2.83    0.07 
   0   2   1    2.81    0.07 
   0   2  -1    2.74    0.07 
   0   2   1    2.77    0.08 
   0   2  -1    2.80    0.08 
   0   2   1    2.83    0.07 
   0  -2   1    2.91    0.07 
   0  -2   1    2.79    0.08 
   0   2   2   12.30    0.24 
   0   2  -2   12.64    0.24 
   0   2   2   12.53    0.23 
   0   2   2   12.17    0.24 
   0   2   2   12.18    0.24 
   0   2  -2   12.53    0.24 
   0  -2   2   13.00    0.23 
   0  -2   2   12.69    0.24 
   0   2   3    1.53    0.06 
   0   2   3    1.39    0.07 
   0   2  -3    1.34    0.07 
   0   2  -3    1.55    0.07 
   0   2   3    1.46    0.07 
   0  -2   3    1.40    0.06 
   0  -2  -3    1.39    0.06 
   0  -2   3    1.40    0.06 
   0   2   4    0.27    0.04 
   0   2   4    0.29    0.04 
   0   2  -4    0.19    0.04 
   0   2  -4    0.31    0.04 
   0   2   4    0.29    0.03 
   0  -2   4    0.24    0.04 
   0  -2  -4    0.24    0.04 
   0  -2   4    0.37    0.04 
   0   2  -5    7.30    0.17 
   0   2   5    7.08    0.19 
   0   2  -5    7.18    0.19 
   0   2   5    7.38    0.15 
   0   2   5    7.02    0.18 
   0  -2   5    7.03    0.18 
   0  -2   5    7.34    0.17 
   0  -2  -5    7.03    0.17 
   0   2  -6    3.07    0.11 
   0   2  -6    2.78    0.12 
   0   2   6    2.77    0.12 
   0   2   6    2.92    0.09 
   0  -2  -6    2.87    0.10 
   0  -2   6    2.81    0.12 
   0  -2   6    3.08    0.10 
   0  -2  -6    2.99    0.12 
   0   2  -7    2.99    0.11 
   0   2   7    2.94    0.13 
   0   2   7    2.94    0.09 
   0   2  -7    2.74    0.13 
   0  -2  -7    2.74    0.10 
   0  -2  -7    2.37    0.13 
   0  -2   7    2.88    0.11 
   0  -2   7    2.63    0.12 
   0   2   8    1.35    0.07 
   0   2   8    1.24    0.11 
   0   2  -8    1.50    0.12 
   0   2  -8    1.16    0.08 
   0  -2  -8    1.31    0.09 
   0  -2   8    1.36    0.10 
   0  -2   8    1.29    0.08 
   0  -2  -8    1.23    0.12 
   0   2   9    0.46    0.08 
   0   2  -9    0.49    0.06 
   0   2  -9    0.44    0.09 
   0  -2   9    0.52    0.06 
   0  -2  -9    0.51    0.09 
   0  -2   9    0.41    0.07 
   0  -2  -9    0.51    0.07 
   0   2  10    9.05    0.29 
   0   2 -10    9.74    0.30 
   0  -2 -10    9.94    0.30 
   0  -2  10   10.07    0.30 
   0  -2  10    9.70    0.24 
   0   2 -11    2.07    0.17 
   0   2  11    2.39    0.16 
   0  -2  11    2.41    0.16 
   0  -2 -11    2.30    0.17 
   0   2  12    0.04    0.06 
   0   2 -12    0.00    0.09 
   0  -2 -12    0.04    0.08 
   0  -2  12    0.05    0.06 
   0   2 -13    7.75    0.30 
   0   2  13    7.24    0.29 
   0  -2 -13    7.00    0.29 
   0  -2  13    7.90    0.30 
   0   2 -14    1.90    0.20 
   0   2  14    2.30    0.18 
   0  -2  14    2.08    0.18 
   0  -2 -14    2.08    0.20 
   0   2 -15    0.60    0.14 
   0   2  15    0.27    0.10 
   0  -2 -15    0.29    0.11 
   0  -2  15    0.44    0.10 
   0   2 -16   -0.10    0.11 
   0   2  16    0.17    0.11 
   0  -2  16    0.11    0.09 
   0  -2 -16   -0.01    0.12 
   0   3   0    0.11    0.03 
   0   3   0    0.06    0.03 
   0  -3   0    0.08    0.03 
   0  -3   0    0.03    0.02 
   0   3  -1   -0.02    0.03 
   0   3   1    0.02    0.02 
   0   3   1    0.01    0.02 
   0   3  -1    0.02    0.03 
   0   3   1    0.01    0.03 
   0  -3  -1   -0.02    0.03 
   0  -3   1   -0.04    0.03 
   0  -3   1    0.02    0.02 
   0   3   2   18.46    0.34 
   0   3   2   18.54    0.33 
   0   3   2   17.80    0.34 
   0   3  -2   17.58    0.34 
   0   3   2   18.49    0.34 
   0   3  -2   18.26    0.34 
   0  -3   2   17.97    0.34 
   0  -3   2   18.63    0.33 
   0   3   3   36.52    0.64 
   0   3  -3   36.61    0.64 
   0   3  -3   36.64    0.64 
   0   3   3   36.09    0.64 
   0   3   3   36.83    0.62 
   0   3   3   36.18    0.65 
   0  -3   3   36.22    0.63 
   0  -3   3   37.32    0.64 
   0   3   4    1.00    0.07 
   0   3   4    1.06    0.07 
   0   3  -4    1.06    0.08 
   0   3   4    1.05    0.06 
   0   3  -4    1.11    0.07 
   0  -3  -4    1.01    0.07 
   0  -3   4    0.96    0.06 
   0  -3   4    1.00    0.06 
   0   3   5    0.75    0.07 
   0   3   5    0.73    0.05 
   0   3   5    0.67    0.07 
   0   3  -5    0.64    0.06 
   0   3  -5    0.72    0.08 
   0  -3   5    0.69    0.06 
   0  -3  -5    0.63    0.06 
   0  -3   5    0.72    0.06 
   0   3  -6    2.29    0.12 
   0   3   6    2.44    0.09 
   0   3   6    2.35    0.11 
   0   3  -6    2.36    0.10 
   0   3   6    2.28    0.11 
   0  -3   6    2.32    0.11 
   0  -3   6    2.44    0.10 
   0  -3  -6    2.21    0.10 
   0   3  -7    2.24    0.13 
   0   3  -7    2.21    0.10 
   0   3   7    2.15    0.08 
   0   3   7    1.82    0.11 
   0  -3  -7    1.82    0.12 
   0  -3   7    2.33    0.10 
   0  -3   7    2.30    0.11 
   0  -3  -7    2.01    0.10 
   0   3  -8    0.09    0.07 
   0   3   8    0.19    0.06 
   0   3   8    0.07    0.03 
   0   3  -8    0.14    0.04 
   0  -3   8    0.16    0.05 
   0  -3  -8    0.09    0.04 
   0  -3   8    0.14    0.05 
   0  -3  -8    0.06    0.06 
   0   3   9    3.91    0.18 
   0   3  -9    3.74    0.14 
   0   3  -9    3.60    0.18 
   0  -3  -9    3.76    0.14 
   0  -3   9    3.59    0.14 
   0  -3  -9    3.96    0.19 
   0  -3   9    3.67    0.16 
   0   3  10    2.85    0.16 
   0   3 -10    2.94    0.18 
   0  -3  10    2.87    0.16 
   0  -3 -10    2.81    0.18 
   0  -3  10    2.91    0.13 
   0  -3 -10    3.06    0.15 
   0   3  11    4.03    0.20 
   0   3 -11    4.11    0.22 
   0  -3  11    3.88    0.19 
   0  -3 -11    4.22    0.21 
   0   3 -12    1.19    0.14 
   0   3  12    1.54    0.15 
   0  -3 -12    1.34    0.15 
   0  -3  12    1.63    0.14 
   0   3  13    0.15    0.08 
   0   3 -13    0.08    0.09 
   0  -3 -13    0.18    0.09 
   0  -3  13   -0.01    0.06 
   0   3  14    0.03    0.08 
   0   3 -14    0.06    0.10 
   0  -3  14    0.10    0.07 
   0  -3 -14    0.03    0.09 
   0   3  15    2.45    0.21 
   0   3 -15    1.72    0.19 
   0  -3 -15    2.04    0.21 
   0  -3  15    2.20    0.19 
   0   3 -16    0.52    0.14 
   0  -3  16    0.41    0.12 
   0   4   0    2.76    0.10 
   0   4   0    2.96    0.09 
   0  -4   0    2.76    0.10 
   0  -4   0    2.85    0.08 
   0   4  -1    2.15    0.08 
   0   4   1    2.49    0.10 
   0   4   1    2.43    0.08 
   0   4  -1    2.35    0.09 
   0  -4  -1    2.39    0.08 
   0  -4   1    2.30    0.09 
   0  -4  -1    2.35    0.09 
   0  -4   1    2.20    0.07 
   0   4   2    5.03    0.12 
   0   4   2    4.95    0.13 
   0   4   2    4.84    0.14 
   0   4  -2    4.79    0.13 
   0   4  -2    4.57    0.14 
   0  -4   2    5.05    0.12 
   0  -4   2    4.78    0.14 
   0  -4  -2    4.80    0.13 
   0   4   3    0.18    0.04 
   0   4   3    0.17    0.03 
   0   4  -3    0.17    0.04 
   0   4  -3    0.18    0.04 
   0   4   3    0.25    0.04 
   0   4   3    0.17    0.04 
   0  -4   3    0.16    0.03 
   0  -4   3    0.13    0.04 
   0   4  -4    3.96    0.13 
   0   4  -4    3.84    0.14 
   0   4   4    3.64    0.13 
   0   4   4    3.80    0.11 
   0   4   4    4.01    0.13 
   0   4   4    3.83    0.13 
   0  -4   4    3.89    0.12 
   0  -4   4    3.95    0.13 
   0   4   5    1.11    0.07 
   0   4   5    1.24    0.08 
   0   4   5    1.00    0.08 
   0   4  -5    1.26    0.09 
   0   4  -5    1.22    0.08 
   0  -4   5    1.25    0.07 
   0  -4  -5    1.17    0.08 
   0  -4   5    1.09    0.08 
   0   4  -6    1.30    0.08 
   0   4  -6    1.07    0.10 
   0   4   6    1.28    0.09 
   0   4   6    1.18    0.07 
   0   4   6    1.30    0.10 
   0  -4   6    1.44    0.09 
   0  -4  -6    1.31    0.09 
   0  -4   6    1.55    0.09 
   0   4  -7    1.35    0.12 
   0   4   7    1.73    0.08 
   0   4   7    1.82    0.11 
   0   4  -7    1.66    0.10 
   0   4   7    1.51    0.11 
   0  -4  -7    1.77    0.10 
   0  -4   7    1.51    0.10 
   0  -4   7    1.55    0.10 
   0   4   8    7.91    0.19 
   0   4  -8    7.93    0.22 
   0   4  -8    7.64    0.25 
   0   4   8    7.53    0.24 
   0  -4  -8    7.67    0.22 
   0  -4   8    7.95    0.23 
   0  -4  -8    7.66    0.25 
   0  -4   8    7.38    0.22 
   0   4  -9    7.43    0.25 
   0   4  -9    7.38    0.22 
   0   4   9    7.61    0.25 
   0  -4   9    7.01    0.23 
   0  -4  -9    7.95    0.22 
   0  -4   9    7.12    0.21 
   0  -4  -9    7.09    0.25 
   0   4 -10    0.88    0.12 
   0   4  10    0.90    0.11 
   0  -4 -10    0.87    0.10 
   0  -4  10    0.96    0.09 
   0  -4  10    1.03    0.11 
   0  -4 -10    1.08    0.12 
   0   4 -11   11.85    0.36 
   0   4  11   11.76    0.36 
   0  -4 -11   11.81    0.36 
   0  -4  11   11.90    0.34 
   0   4  12    3.91    0.21 
   0   4 -12    3.59    0.22 
   0  -4  12    3.98    0.20 
   0  -4 -12    3.53    0.21 
   0   4  13    0.98    0.13 
   0   4 -13    1.16    0.15 
   0  -4  13    1.15    0.13 
   0  -4 -13    1.13    0.15 
   0   4  14    0.03    0.09 
   0   4 -14    0.13    0.10 
   0  -4  14    0.08    0.08 
   0  -4 -14    0.23    0.11 
   0   4 -15    0.39    0.14 
   0   4  15    0.43    0.12 
   0  -4  15    0.55    0.12 
   0  -4 -15    0.41    0.13 
   0   4 -16    0.16    0.14 
   0  -4  16    0.10    0.09 
   0   5   0    0.05    0.03 
   0   5   0    0.03    0.03 
   0  -5   0    0.02    0.04 
   0  -5   0    0.04    0.02 
   0   5  -1    4.28    0.12 
   0   5   1    3.88    0.12 
   0   5   1    3.65    0.13 
   0   5  -1    3.83    0.13 
   0  -5  -1    3.87    0.13 
   0  -5   1    3.98    0.13 
   0  -5  -1    3.91    0.11 
   0  -5   1    4.10    0.10 
   0   5   2    8.09    0.19 
   0   5   2    7.98    0.21 
   0   5  -2    8.23    0.20 
   0   5  -2    7.99    0.21 
   0   5   2    8.28    0.18 
   0  -5   2    8.38    0.17 
   0  -5  -2    8.27    0.20 
   0  -5   2    7.99    0.21 
   0   5  -3    6.21    0.18 
   0   5   3    6.36    0.16 
   0   5   3    6.01    0.18 
   0   5   3    6.25    0.17 
   0   5  -3    5.91    0.17 
   0  -5  -3    6.13    0.16 
   0  -5   3    6.26    0.15 
   0  -5   3    5.76    0.17 
   0   5   4    0.24    0.05 
   0   5   4    0.20    0.04 
   0   5  -4    0.21    0.05 
   0   5   4    0.15    0.04 
   0   5  -4    0.25    0.05 
   0   5   4    0.21    0.04 
   0  -5   4    0.31    0.04 
   0  -5   4    0.24    0.05 
   0   5   5    8.01    0.20 
   0   5   5    7.95    0.21 
   0   5  -5    8.25    0.22 
   0   5   5    7.88    0.21 
   0   5  -5    7.95    0.22 
   0   5   5    7.75    0.22 
   0  -5   5    7.78    0.21 
   0  -5   5    8.19    0.20 
   0   5  -6    0.58    0.08 
   0   5   6    0.37    0.06 
   0   5  -6    0.52    0.07 
   0   5   6    0.37    0.05 
   0   5   6    0.40    0.06 
   0  -5  -6    0.50    0.07 
   0  -5   6    0.40    0.07 
   0  -5   6    0.44    0.06 
   0   5   7    3.06    0.12 
   0   5   7    3.04    0.15 
   0   5   7    2.67    0.14 
   0   5  -7    3.06    0.13 
   0   5  -7    3.02    0.16 
   0  -5   7    2.95    0.14 
   0  -5   7    3.04    0.13 
   0  -5  -7    2.79    0.13 
   0   5  -8    0.13    0.05 
   0   5   8   -0.05    0.05 
   0   5   8    0.05    0.05 
   0   5  -8    0.04    0.07 
   0  -5   8    0.14    0.05 
   0  -5   8    0.08    0.05 
   0  -5  -8    0.06    0.05 
   0   5  -9    0.11    0.06 
   0   5  -9    0.01    0.08 
   0   5   9   -0.04    0.05 
   0  -5  -9    0.07    0.07 
   0  -5  -9    0.06    0.05 
   0  -5   9    0.08    0.06 
   0  -5   9    0.06    0.05 
   0   5 -10    0.10    0.08 
   0   5  10   -0.07    0.06 
   0  -5 -10    0.06    0.05 
   0  -5 -10    0.00    0.07 
   0  -5  10    0.05    0.05 
   0  -5  10    0.09    0.06 
   0   5  11    0.03    0.07 
   0   5 -11   -0.05    0.09 
   0  -5  11    0.03    0.05 
   0  -5 -11    0.11    0.08 
   0  -5  11    0.00    0.05 
   0   5  12    0.10    0.08 
   0   5 -12   -0.14    0.09 
   0  -5 -12   -0.01    0.08 
   0  -5  12    0.08    0.06 
   0   5 -13    1.34    0.16 
   0   5  13    1.15    0.15 
   0  -5  13    1.30    0.14 
   0  -5 -13    1.17    0.15 
   0   5 -14    0.49    0.14 
   0   5  14    0.36    0.11 
   0  -5 -14    0.52    0.13 
   0  -5  14    0.48    0.11 
   0   5  15   -0.02    0.09 
   0   5 -15    0.05    0.12 
   0  -5 -15    0.09    0.11 
   0  -5  15    0.20    0.10 
   0  -5  16    1.48    0.19 
   0   6   0    9.59    0.25 
   0   6   0    9.83    0.23 
   0  -6   0   10.24    0.25 
   0  -6   0   10.48    0.21 
   0   6   1    2.98    0.13 
   0   6   1    3.02    0.11 
   0   6  -1    3.12    0.13 
   0   6  -1    3.13    0.11 
   0  -6  -1    3.18    0.13 
   0  -6   1    3.23    0.09 
   0  -6  -1    3.18    0.10 
   0  -6   1    3.05    0.13 
   0   6   2    7.30    0.19 
   0   6  -2    7.44    0.21 
   0   6   2    7.10    0.21 
   0   6  -2    7.47    0.19 
   0  -6  -2    7.66    0.18 
   0  -6   2    7.23    0.21 
   0  -6   2    7.84    0.16 
   0  -6  -2    7.26    0.20 
   0   6  -3    1.26    0.09 
   0   6   3    1.26    0.08 
   0   6  -3    1.14    0.09 
   0   6   3    1.30    0.09 
   0   6   3    1.29    0.08 
   0  -6   3    1.28    0.07 
   0  -6  -3    1.29    0.09 
   0  -6   3    1.04    0.09 
   0   6   4    0.16    0.05 
   0   6   4    0.12    0.05 
   0   6  -4    0.14    0.05 
   0   6  -4    0.09    0.05 
   0   6   4    0.16    0.04 
   0  -6  -4    0.10    0.05 
   0  -6   4    0.10    0.05 
   0  -6   4    0.13    0.04 
   0   6  -5    5.60    0.19 
   0   6   5    5.13    0.17 
   0   6   5    5.25    0.18 
   0   6  -5    5.15    0.18 
   0   6   5    5.65    0.18 
   0  -6   5    5.50    0.16 
   0  -6   5    5.18    0.18 
   0  -6  -5    5.25    0.17 
   0   6   6   15.67    0.36 
   0   6  -6   14.92    0.36 
   0   6   6   14.76    0.33 
   0   6   6   15.06    0.36 
   0   6  -6   15.42    0.35 
   0  -6   6   15.37    0.36 
   0  -6   6   15.09    0.33 
   0  -6  -6   15.03    0.36 
   0   6  -7    2.11    0.13 
   0   6   7    2.37    0.13 
   0   6  -7    2.31    0.15 
   0   6   7    2.21    0.11 
   0   6   7    2.17    0.13 
   0  -6   7    2.35    0.12 
   0  -6  -7    2.15    0.13 
   0  -6   7    2.17    0.14 
   0   6  -8   -0.01    0.07 
   0   6  -8    0.05    0.05 
   0   6   8    0.05    0.05 
   0   6   8    0.08    0.06 
   0  -6   8   -0.02    0.06 
   0  -6   8   -0.05    0.04 
   0  -6  -8   -0.08    0.05 
   0   6  -9    0.39    0.07 
   0   6  -9    0.48    0.10 
   0   6   9    0.62    0.10 
   0   6   9    0.47    0.09 
   0  -6   9    0.51    0.08 
   0  -6  -9    0.51    0.08 
   0  -6   9    0.44    0.08 
   0   6 -10    1.20    0.14 
   0   6  10    0.88    0.11 
   0  -6 -10    0.91    0.10 
   0  -6  10    1.07    0.11 
   0  -6  10    0.86    0.10 
   0  -6 -10    0.78    0.12 
   0   6 -11    0.01    0.09 
   0   6  11    0.06    0.07 
   0  -6  11    0.05    0.06 
   0  -6 -11    0.07    0.08 
   0  -6  11   -0.02    0.06 
   0   6 -12    2.28    0.21 
   0   6  12    2.25    0.18 
   0  -6  12    1.92    0.15 
   0  -6 -12    2.21    0.19 
   0   6 -13    1.31    0.17 
   0   6  13    1.49    0.17 
   0  -6  13    1.42    0.15 
   0  -6 -13    1.27    0.15 
   0   6  14    0.04    0.09 
   0   6 -14    0.06    0.12 
   0  -6 -14    0.07    0.11 
   0  -6  14    0.11    0.09 
   0   6  15    0.13    0.10 
   0   6 -15   -0.21    0.12 
   0   7   0    0.00    0.04 
   0   7   0    0.06    0.04 
   0  -7   0    0.03    0.03 
   0  -7   0    0.03    0.05 
   0   7  -1   14.67    0.32 
   0   7   1   14.79    0.32 
   0   7  -1   14.11    0.34 
   0   7   1   14.18    0.34 
   0  -7   1   15.22    0.28 
   0  -7   1   14.57    0.34 
   0  -7  -1   14.79    0.29 
   0  -7  -1   14.25    0.33 
   0   7   2    2.96    0.14 
   0   7  -2    2.96    0.14 
   0   7  -2    2.95    0.12 
   0   7   2    3.20    0.13 
   0  -7  -2    3.01    0.13 
   0  -7  -2    3.03    0.11 
   0  -7   2    2.99    0.15 
   0  -7   2    2.91    0.09 
   0   7  -3    3.44    0.14 
   0   7  -3    3.74    0.16 
   0   7   3    3.88    0.14 
   0   7   3    3.60    0.15 
   0  -7  -3    3.70    0.13 
   0  -7   3    3.81    0.16 
   0  -7   3    3.98    0.11 
   0  -7  -3    3.64    0.15 
   0   7   4    0.83    0.09 
   0   7  -4    1.02    0.10 
   0   7   4    0.91    0.08 
   0   7   4    0.93    0.10 
   0   7  -4    0.89    0.10 
   0  -7  -4    0.91    0.10 
   0  -7   4    0.75    0.09 
   0  -7   4    1.01    0.07 
   0   7  -5    1.70    0.12 
   0   7   5    1.52    0.10 
   0   7   5    1.56    0.12 
   0   7  -5    1.77    0.13 
   0   7   5    1.51    0.11 
   0  -7   5    1.72    0.13 
   0  -7   5    1.53    0.09 
   0  -7  -5    1.43    0.11 
   0   7   6    0.23    0.06 
   0   7   6    0.15    0.06 
   0   7  -6    0.09    0.06 
   0   7  -6    0.20    0.07 
   0   7   6    0.08    0.06 
   0  -7   6    0.10    0.07 
   0  -7  -6    0.22    0.06 
   0  -7  -6    0.20    0.07 
   0  -7   6    0.15    0.05 
   0   7  -7   14.51    0.37 
   0   7   7   15.23    0.38 
   0   7  -7   14.83    0.38 
   0   7   7   15.09    0.37 
   0  -7   7   15.07    0.38 
   0  -7  -7   15.35    0.34 
   0  -7   7   15.33    0.35 
   0  -7  -7   14.89    0.37 
   0   7  -8   19.71    0.46 
   0   7   8   20.04    0.47 
   0   7   8   20.23    0.47 
   0   7  -8   19.33    0.47 
   0  -7  -8   20.22    0.46 
   0  -7   8   20.47    0.47 
   0   7   9   15.21    0.41 
   0   7   9   15.82    0.42 
   0   7  -9   15.80    0.39 
   0   7  -9   16.03    0.42 
   0  -7   9   15.71    0.40 
   0  -7  -9   15.12    0.39 
   0   7  10    2.33    0.16 
   0   7 -10    2.70    0.19 
   0  -7 -10    2.16    0.15 
   0  -7 -10    2.45    0.18 
   0  -7  10    2.60    0.16 
   0   7  11    0.20    0.08 
   0   7 -11    0.21    0.10 
   0  -7  11    0.06    0.07 
   0  -7 -11    0.19    0.09 
   0   7  12    0.21    0.09 
   0   7 -12    0.36    0.12 
   0  -7 -12    0.39    0.11 
   0   7 -13    1.08    0.17 
   0   7  13    1.02    0.14 
   0  -7 -13    1.23    0.16 
   0   7  14    0.15    0.10 
   0   7 -14    0.01    0.12 
   0  -7 -14    0.09    0.11 
   0   8   0    0.06    0.04 
   0   8   0    0.06    0.05 
   0  -8   0    0.01    0.06 
   0   8  -1    0.03    0.04 
   0   8   1    0.02    0.04 
   0   8  -1    0.10    0.06 
   0   8   1    0.07    0.05 
   0  -8   1   -0.02    0.05 
   0  -8  -1    0.08    0.06 
   0   8   2    1.74    0.10 
   0   8   2    1.55    0.12 
   0   8  -2    1.66    0.10 
   0   8  -2    1.52    0.12 
   0  -8  -2    1.76    0.12 
   0  -8   2    1.74    0.13 
   0   8  -3    0.06    0.06 
   0   8   3    0.04    0.05 
   0   8   3   -0.02    0.05 
   0   8  -3   -0.01    0.05 
   0  -8  -3    0.00    0.05 
   0  -8   3    0.01    0.06 
   0   8   4    4.94    0.18 
   0   8  -4    4.64    0.18 
   0   8  -4    4.82    0.19 
   0   8   4    4.78    0.19 
   0  -8  -4    5.14    0.19 
   0  -8   4    4.55    0.19 
   0  -8  -4    4.79    0.17 
   0   8   5    1.44    0.11 
   0   8   5    1.68    0.13 
   0   8   5    1.61    0.11 
   0   8  -5    1.13    0.12 
   0   8  -5    1.05    0.12 
   0  -8   5    1.46    0.14 
   0  -8  -5    1.67    0.12 
   0   8   6    1.00    0.11 
   0   8   6    1.24    0.11 
   0   8  -6    1.08    0.11 
   0   8   6    1.29    0.12 
   0   8  -6    1.10    0.12 
   0  -8  -6    1.02    0.11 
   0  -8   6    1.14    0.12 
   0   8  -7    9.30    0.29 
   0   8   7    9.35    0.27 
   0   8   7    9.15    0.28 
   0   8  -7    9.48    0.29 
   0  -8  -7    9.02    0.28 
   0  -8   7    9.73    0.29 
   0  -8  -7    8.96    0.26 
   0   8  -8    3.41    0.17 
   0   8   8    3.38    0.18 
   0   8   8    3.40    0.17 
   0   8  -8    3.59    0.20 
   0  -8   8    3.13    0.17 
   0  -8  -8    3.32    0.18 
   0   8  -9    0.23    0.08 
   0   8   9    0.18    0.07 
   0   8  -9    0.36    0.10 
   0   8   9    0.35    0.09 
   0  -8  -9    0.24    0.08 
   0  -8   9    0.28    0.08 
   0   8 -10    0.42    0.11 
   0   8  10    0.53    0.11 
   0   8  10    0.45    0.10 
   0  -8 -10    0.47    0.10 
   0  -8  10    0.41    0.10 
   0   8 -11    1.52    0.17 
   0   8  11    1.47    0.16 
   0  -8 -11    1.41    0.16 
   0  -8  11    1.70    0.16 
   0   8  12   -0.06    0.07 
   0  -8 -12    0.12    0.10 
   0   8  13    0.19    0.10 
   0  -8 -13    0.19    0.11 
   0   8  14    0.36    0.12 
   0   9   0   -0.03    0.06 
   0   9   0   -0.04    0.04 
   0  -9   0    0.06    0.07 
   0   9  -1    0.08    0.06 
   0   9  -1    0.08    0.05 
   0   9   1    0.09    0.05 
   0   9   1    0.04    0.06 
   0  -9   1    0.04    0.07 
   0  -9  -1    0.07    0.07 
   0   9  -2    0.68    0.10 
   0   9  -2    0.84    0.10 
   0   9   2    0.83    0.09 
   0   9   2    0.85    0.10 
   0  -9   2    0.71    0.10 
   0  -9  -2    1.04    0.11 
   0   9  -3    0.12    0.07 
   0   9   3    0.25    0.07 
   0   9  -3    0.17    0.06 
   0   9   3    0.28    0.06 
   0  -9  -3    0.21    0.07 
   0  -9   3    0.16    0.07 
   0   9   4    4.72    0.20 
   0   9   4    4.78    0.19 
   0   9  -4    4.42    0.18 
   0   9  -4    4.57    0.20 
   0  -9   4    4.58    0.20 
   0  -9  -4    4.50    0.19 
   0   9   5   10.84    0.32 
   0   9  -5   10.55    0.30 
   0   9  -5   11.44    0.32 
   0   9   5   11.20    0.30 
   0  -9   5   10.74    0.33 
   0  -9  -5   10.72    0.30 
   0   9  -6    1.12    0.13 
   0   9  -6    0.95    0.11 
   0   9   6    0.85    0.10 
   0   9   6    0.84    0.11 
   0  -9  -6    0.70    0.10 
   0  -9   6    1.17    0.13 
   0   9  -7    0.89    0.11 
   0   9  -7    1.01    0.12 
   0   9   7    1.17    0.12 
   0  -9   7    0.96    0.12 
   0  -9  -7    1.21    0.13 
   0   9  -8    1.71    0.15 
   0   9   8    1.65    0.15 
   0  -9   8    1.84    0.16 
   0  -9  -8    2.09    0.16 
   0   9   9    1.53    0.16 
   0   9  -9    1.56    0.15 
   0  -9  -9    1.87    0.16 
   0  -9   9    1.89    0.16 
   0   9  10    0.04    0.08 
   0  -9  10    0.02    0.08 
   0  -9 -11    0.03    0.08 
   0  -9  11    0.04    0.08 
   0  -9 -12    0.09    0.10 
   0  -9 -13    0.19    0.11 
   0  10   0    0.59    0.10 
   0  10   0    0.66    0.08 
   0 -10   0    0.62    0.10 
   0  10   1    1.30    0.11 
   0  10  -1    1.13    0.13 
   0  10   1    1.36    0.14 
   0  10  -1    1.18    0.10 
   0 -10  -1    1.24    0.13 
   0 -10   1    1.15    0.13 
   0  10   2    0.69    0.09 
   0  10   2    0.60    0.10 
   0  10  -2    0.71    0.10 
   0 -10   2    0.65    0.11 
   0 -10  -2    0.66    0.10 
   0  10  -3    3.71    0.19 
   0  10   3    3.61    0.19 
   0  10   3    3.70    0.17 
   0 -10  -3    3.43    0.18 
   0 -10   3    3.54    0.19 
   0  10  -4    3.34    0.18 
   0  10   4    3.40    0.18 
   0  10   4    3.37    0.16 
   0 -10   4    3.28    0.19 
   0 -10  -4    3.15    0.17 
   0  10   5    0.08    0.06 
   0  10   5    0.09    0.06 
   0  10  -5    0.03    0.07 
   0 -10  -5    0.10    0.07 
   0 -10   5    0.03    0.08 
   0  10   6    3.53    0.18 
   0  10  -6    3.47    0.19 
   0  10   6    3.53    0.20 
   0 -10   6    3.45    0.20 
   0 -10  -6    3.42    0.18 
   0  10  -7    0.06    0.07 
   0  10   7    0.00    0.06 
   0 -10  -7   -0.07    0.07 
   0 -10   7    0.00    0.08 
   0  10  -8    0.16    0.08 
   0  10   8   -0.05    0.07 
   0 -10   8    0.03    0.08 
   0 -10  -8    0.03    0.08 
   0  10   9    0.19    0.09 
   0  10  -9    0.11    0.09 
   0 -10   9    0.17    0.09 
   0 -10  -9    0.23    0.09 
   0  10  10    0.01    0.09 
   0 -10  10    0.07    0.09 
   0 -10 -11    0.36    0.11 
   0 -10  11    0.12    0.10 
   0 -10 -12    0.19    0.11 
   0  11   0    0.11    0.08 
   0 -11   0    0.03    0.08 
   0  11   1    0.51    0.10 
   0  11  -1    0.38    0.09 
   0 -11  -1    0.23    0.09 
   0 -11   1    0.56    0.10 
   0  11   2    1.92    0.16 
   0  11  -2    1.74    0.15 
   0 -11   2    2.06    0.16 
   0 -11  -2    1.87    0.16 
   0  11  -3    0.78    0.12 
   0  11   3    0.93    0.12 
   0 -11   3    0.91    0.12 
   0 -11  -3    0.90    0.12 
   0  11  -4    0.00    0.07 
   0  11   4   -0.10    0.07 
   0 -11  -4    0.09    0.08 
   0 -11   4    0.18    0.09 
   0  11  -5    0.12    0.08 
   0  11   5    0.08    0.08 
   0 -11   5    0.11    0.09 
   0 -11  -5    0.18    0.08 
   0  11  -6    1.51    0.16 
   0  11   6    1.55    0.15 
   0 -11   6    1.24    0.14 
   0 -11  -6    1.21    0.13 
   0  11  -7    1.56    0.16 
   0 -11  -7    1.48    0.16 
   0 -11   7    1.38    0.15 
   0  11   8    0.20    0.09 
   0  11  -8    0.44    0.11 
   0 -11  -8    0.26    0.10 
   0 -11   8    0.18    0.09 
   0  11   9    0.18    0.10 
   0  11  -9   -0.01    0.09 
   0 -11   9    0.14    0.10 
   0 -11  -9    0.04    0.09 
   0  11  10    0.58    0.13 
   0 -11  10    0.63    0.13 
   0 -11  11    1.19    0.16 
   0 -11 -11    1.26    0.17 
   0  12   0    2.44    0.18 
   0 -12   0    2.58    0.19 
   0  12  -1    0.12    0.08 
   0  12   1    0.24    0.09 
   0 -12  -1    0.12    0.09 
   0 -12   1    0.16    0.09 
   0  12  -2    0.09    0.08 
   0  12   2    0.18    0.09 
   0 -12   2    0.21    0.09 
   0 -12  -2    0.20    0.10 
   0  12  -3    0.00    0.08 
   0  12   3    0.02    0.08 
   0 -12  -3    0.17    0.09 
   0 -12   3   -0.02    0.08 
   0  12   4    0.18    0.10 
   0  12  -4    0.32    0.10 
   0 -12  -4    0.22    0.09 
   0 -12   4    0.25    0.10 
   0  12  -5    0.27    0.10 
   0  12   5    0.02    0.08 
   0 -12   5    0.22    0.10 
   0 -12  -5    0.14    0.09 
   0  12  -6    1.60    0.17 
   0  12   6    1.63    0.18 
   0 -12   6    1.34    0.16 
   0  12  -7    2.56    0.20 
   0 -12  -7    2.38    0.20 
   0 -12   7    2.52    0.21 
   0  12  -8    1.28    0.16 
   0 -12   8    1.23    0.16 
   0 -12  -8    1.23    0.16 
   0  12  -9    0.02    0.10 
   0 -12  -9    0.52    0.13 
   0 -12   9    0.17    0.11 
   0  13   0   -0.04    0.07 
   0 -13   0   -0.08    0.09 
   0  13  -1    0.11    0.10 
   0  13   1    0.12    0.09 
   0 -13   1    0.07    0.09 
   0 -13  -1    0.04    0.09 
   0  13  -2    0.08    0.09 
   0  13   2    0.03    0.09 
   0 -13   2    0.06    0.10 
   0 -13  -2    0.02    0.09 
   0  13  -3    0.33    0.11 
   0  13   3    0.24    0.10 
   0 -13   3    0.37    0.11 
   0 -13  -3    0.40    0.11 
   0  13  -4    1.04    0.15 
   0  13   4    0.99    0.15 
   0 -13  -4    0.95    0.14 
   0 -13   4    1.00    0.15 
   0  13  -5    0.33    0.11 
   0  13   5    0.38    0.11 
   0 -13  -5    0.10    0.10 
   0 -13   5    0.41    0.13 
   0  13  -6    0.05    0.10 
   0  13   6    0.24    0.11 
   0 -13   6    0.05    0.10 
   0  13  -7    0.10    0.11 
   0 -13   7    0.12    0.11 
   0 -13  -7    0.14    0.11 
   0  13  -8    0.00    0.10 
   0 -13  -8   -0.01    0.10 
   0  14   0    0.07    0.10 
   0 -14   0    0.08    0.10 
   0  14   1    0.25    0.11 
   0  14  -1    0.37    0.11 
   0 -14   1    0.33    0.12 
   0 -14  -1    0.48    0.13 
   0  14  -2    0.16    0.11 
   0  14   2   -0.09    0.09 
   0 -14   2    0.10    0.11 
   0 -14  -2   -0.21    0.09 
   0  14   3    1.91    0.21 
   0  14  -3    1.81    0.19 
   0 -14   3    1.88    0.21 
   0 -14  -3    1.79    0.20 
   0  14  -4    1.12    0.16 
   0  14   4    1.11    0.16 
   0 -14  -4    1.30    0.16 
   1   0 -16    0.95    0.16 
  -1   0  16    0.78    0.13 
  -1   0  15   -0.02    0.08 
   1   0 -15   -0.04    0.10 
   1   0 -14    5.46    0.27 
  -1   0  14    5.54    0.26 
   1   0 -13   -0.03    0.08 
  -1   0  13   -0.08    0.06 
  -1   0  12    7.07    0.26 
   1   0 -12    7.68    0.29 
  -1   0  11    0.11    0.06 
   1   0 -11    0.06    0.08 
   1   0 -10    8.43    0.27 
  -1   0  10    8.58    0.21 
  -1   0  10    8.28    0.27 
   1   0  -9   -0.02    0.06 
  -1   0   9    0.03    0.03 
  -1   0   9   -0.04    0.05 
   1   0  -9    0.00    0.04 
   1   0  -8   21.43    0.46 
   1   0  -8   22.29    0.41 
  -1   0   8   21.38    0.41 
  -1   0   8   21.31    0.46 
  -1   0   7    0.03    0.03 
   1   0  -7   -0.04    0.03 
  -1   0   7   -0.01    0.02 
   1   0  -7    0.00    0.04 
  -1   0   6    1.67    0.07 
   1   0  -6    1.78    0.07 
  -1   0   6    1.58    0.09 
   1   0  -6    1.43    0.09 
   1   0  -5   -0.02    0.02 
  -1   0   5   -0.01    0.03 
   1   0  -5   -0.05    0.03 
  -1   0   5   -0.01    0.02 
  -1   0   4    7.90    0.19 
   1   0  -4    8.32    0.16 
  -1   0   4    8.24    0.17 
   1   0  -4    7.75    0.19 
  -1   0   3   -0.03    0.02 
  -1   0   3    0.00    0.02 
   1   0  -3   -0.03    0.02 
   1   0  -3   -0.01    0.01 
  -1   0   2    0.30    0.03 
   1   0  -2    0.30    0.03 
  -1   0   2    0.32    0.03 
  -1   0   1   -0.19    0.01 
   1   0  -1   -0.19    0.01 
  -1   0   1   -0.19    0.01 
  -1   0   0   -0.02    0.00 
   1   0   0   -0.02    0.01 
  -1   0  -1   -0.02    0.01 
   1   0   1   -0.01    0.01 
   1   0   1   -0.04    0.01 
   1   0   2    2.13    0.07 
   1   0   2    2.20    0.05 
  -1   0  -2    2.26    0.07 
   1   0   2    2.21    0.07 
   1   0   3   -0.01    0.01 
  -1   0  -3    0.02    0.03 
  -1   0  -3   -0.06    0.02 
   1   0   3    0.00    0.03 
  -1   0  -4    0.02    0.03 
  -1   0  -4    0.07    0.03 
   1   0   4    0.08    0.02 
   1   0   4    0.03    0.03 
  -1   0  -5   -0.03    0.03 
   1   0   5   -0.01    0.02 
  -1   0  -5    0.00    0.03 
   1   0   5   -0.01    0.03 
   1   0   6    0.48    0.06 
   1   0   6    0.45    0.04 
  -1   0  -6    0.49    0.05 
  -1   0  -6    0.43    0.06 
  -1   0  -7   -0.02    0.03 
  -1   0  -7    0.00    0.05 
   1   0   7   -0.01    0.02 
   1   0   7   -0.01    0.03 
  -1   0  -8    0.04    0.04 
   1   0   8    0.00    0.04 
   1   0   8    0.00    0.03 
  -1   0  -8    0.07    0.06 
  -1   0  -9    0.03    0.05 
   1   0   9    0.00    0.04 
  -1   0  -9   -0.05    0.07 
  -1   0 -10    0.78    0.08 
   1   0  10    1.33    0.12 
  -1   0 -10    1.06    0.12 
  -1   0 -11    0.10    0.08 
   1   0  11    0.03    0.05 
   1   0  12    0.22    0.07 
  -1   0 -12    0.16    0.09 
  -1   0 -13    0.16    0.09 
   1   0  13    0.04    0.07 
   1   0  14   16.86    0.49 
  -1   0 -14   17.10    0.49 
   1   0  15    0.09    0.08 
  -1   0 -15    0.11    0.11 
  -1   0 -16    1.04    0.18 
  -1   1  16    0.02    0.08 
   1   1 -16   -0.01    0.11 
  -1  -1  16    0.03    0.09 
   1  -1 -16    0.07    0.11 
   1   1 -15    0.22    0.11 
  -1   1  15    0.26    0.09 
  -1  -1  15    0.21    0.09 
   1  -1 -15    0.25    0.12 
   1   1 -14    0.99    0.15 
  -1   1  14    1.15    0.14 
  -1  -1  14    1.01    0.14 
   1  -1 -14    0.91    0.14 
  -1   1  13    0.01    0.06 
   1   1 -13    0.05    0.09 
   1  -1 -13    0.09    0.09 
  -1  -1  13    0.05    0.07 
  -1   1  12   -0.03    0.05 
   1   1 -12    0.02    0.08 
   1  -1 -12    0.05    0.08 
  -1  -1  12    0.05    0.06 
  -1   1  11   11.52    0.34 
   1   1 -11   11.94    0.35 
  -1  -1  11   12.40    0.35 
   1  -1 -11   11.46    0.34 
  -1   1  10    0.52    0.08 
   1   1 -10    0.64    0.10 
  -1  -1  10    0.73    0.07 
  -1  -1  10    0.65    0.09 
   1  -1 -10    0.65    0.10 
  -1   1   9    2.12    0.09 
   1   1  -9    1.99    0.14 
  -1   1   9    2.05    0.13 
   1   1  -9    2.09    0.10 
  -1  -1   9    2.08    0.13 
   1  -1  -9    2.30    0.10 
   1  -1  -9    1.93    0.14 
  -1  -1   9    1.96    0.10 
   1   1  -8    2.56    0.14 
  -1   1   8    2.60    0.13 
   1   1  -8    2.52    0.10 
  -1   1   8    2.57    0.10 
  -1  -1   8    2.49    0.13 
   1  -1  -8    2.47    0.14 
  -1  -1   8    2.42    0.10 
   1  -1  -8    2.75    0.10 
   1   1  -7    0.38    0.06 
  -1   1   7    0.32    0.04 
   1   1  -7    0.47    0.05 
  -1   1   7    0.39    0.06 
   1  -1  -7    0.39    0.06 
  -1  -1   7    0.47    0.06 
   1  -1  -7    0.46    0.05 
  -1  -1   7    0.47    0.05 
   1   1  -6    2.79    0.09 
  -1   1   6    2.58    0.09 
   1   1  -6    2.61    0.12 
  -1   1   6    2.41    0.11 
  -1  -1   6    2.44    0.09 
  -1  -1   6    2.53    0.11 
   1  -1  -6    2.59    0.12 
   1  -1  -6    2.64    0.08 
   1   1  -5   16.14    0.28 
  -1   1   5   15.38    0.29 
  -1   1   5   14.67    0.32 
   1   1  -5   15.05    0.32 
  -1  -1   5   15.36    0.29 
   1  -1  -5   15.34    0.28 
  -1  -1   5   15.35    0.32 
   1  -1  -5   15.36    0.32 
   1   1  -4    0.98    0.07 
   1   1  -4    1.18    0.05 
  -1   1   4    1.07    0.05 
  -1  -1   4    1.04    0.06 
   1  -1  -4    1.15    0.05 
  -1  -1   4    1.10    0.06 
   1  -1  -4    1.04    0.07 
  -1   1   3   12.03    0.22 
  -1   1   3   11.83    0.24 
   1   1  -3   12.42    0.22 
   1   1  -3   12.22    0.24 
   1  -1  -3   12.59    0.22 
  -1  -1   3   11.99    0.23 
   1  -1  -3   11.72    0.23 
  -1  -1   3   12.21    0.24 
  -1   1   2   66.25    1.06 
   1   1  -2   65.63    1.07 
  -1   1   2   64.76    1.05 
   1   1  -2   66.37    1.06 
  -1   1   2   65.09    1.10 
  -1  -1   2   65.61    1.06 
  -1  -1   2   66.01    1.09 
   1  -1  -2   66.56    1.07 
   1   1  -1   18.27    0.31 
  -1   1   1   18.14    0.31 
  -1   1   1   18.26    0.31 
   1   1  -1   18.69    0.32 
  -1   1   1   18.28    0.31 
  -1   1   1   18.18    0.32 
  -1  -1   1   18.32    0.31 
  -1  -1   1   18.57    0.31 
   1   1   0    0.46    0.02 
  -1   1   0    0.48    0.02 
   1   1   0    0.46    0.03 
  -1   1   0    0.43    0.03 
  -1  -1   0    0.43    0.02 
   1  -1   0    0.44    0.02 
   1   1   1    4.23    0.09 
  -1   1  -1    4.32    0.08 
   1   1   1    4.26    0.09 
  -1   1  -1    4.23    0.09 
  -1  -1  -1    4.15    0.08 
   1  -1   1    4.18    0.09 
   1  -1   1    4.35    0.09 
  -1  -1  -1    4.17    0.09 
  -1   1  -2    4.47    0.10 
   1   1   2    4.48    0.08 
  -1   1  -2    4.34    0.10 
   1   1   2    4.41    0.11 
   1   1   2    4.50    0.11 
   1  -1   2    4.37    0.11 
  -1  -1  -2    4.38    0.10 
   1  -1   2    4.34    0.09 
   1   1   3   13.69    0.27 
   1   1   3   13.76    0.23 
  -1   1  -3   13.77    0.26 
  -1   1  -3   13.85    0.26 
  -1  -1  -3   13.90    0.26 
   1  -1   3   13.59    0.25 
   1  -1   3   13.64    0.27 
  -1   1  -4    0.04    0.03 
   1   1   4    0.00    0.03 
   1   1   4    0.04    0.02 
  -1   1  -4    0.01    0.03 
   1   1   4    0.06    0.03 
   1  -1   4    0.06    0.03 
   1  -1   4    0.06    0.02 
  -1  -1  -4    0.03    0.03 
   1   1   5    0.27    0.03 
   1   1   5    0.26    0.05 
  -1   1  -5    0.25    0.04 
  -1   1  -5    0.27    0.05 
  -1  -1  -5    0.24    0.05 
   1  -1   5    0.29    0.05 
  -1  -1  -5    0.25    0.04 
   1  -1   5    0.22    0.03 
  -1   1  -6    7.22    0.18 
   1   1   6    7.31    0.15 
  -1   1  -6    7.55    0.20 
   1  -1   6    7.26    0.16 
   1  -1   6    7.05    0.20 
  -1  -1  -6    7.60    0.18 
  -1   1  -7    0.02    0.04 
   1   1   7    0.05    0.02 
  -1   1  -7    0.06    0.05 
   1   1   7    0.03    0.04 
  -1  -1  -7   -0.02    0.04 
  -1  -1  -7    0.02    0.04 
   1  -1   7    0.07    0.04 
   1  -1   7   -0.02    0.02 
  -1   1  -8    5.71    0.20 
   1   1   8    6.09    0.14 
   1   1   8    6.05    0.20 
  -1   1  -8    6.26    0.18 
   1  -1   8    6.09    0.15 
  -1  -1  -8    5.78    0.17 
   1  -1   8    5.97    0.20 
  -1  -1  -8    5.88    0.21 
  -1   1  -9   10.20    0.29 
   1   1   9   10.00    0.29 
  -1   1  -9   10.20    0.25 
   1  -1   9   10.22    0.24 
  -1  -1  -9    9.88    0.29 
   1  -1   9    9.74    0.29 
  -1  -1  -9   10.05    0.25 
  -1   1 -10    1.21    0.11 
   1   1  10    1.65    0.13 
  -1   1 -10    1.38    0.14 
  -1  -1 -10    1.39    0.11 
   1  -1  10    1.26    0.12 
  -1  -1 -10    1.39    0.15 
  -1   1 -11   -0.05    0.08 
   1   1  11    0.12    0.07 
  -1  -1 -11    0.02    0.08 
   1  -1  11    0.12    0.06 
  -1   1 -12    9.04    0.32 
   1   1  12    9.25    0.31 
  -1  -1 -12    9.71    0.32 
   1  -1  12    9.10    0.31 
   1   1  13   10.12    0.35 
  -1   1 -13    9.86    0.35 
   1  -1  13    9.87    0.34 
  -1  -1 -13   10.17    0.35 
  -1   1 -14    0.17    0.10 
   1   1  14    0.02    0.07 
  -1  -1 -14    0.08    0.10 
   1  -1  14    0.17    0.08 
   1   1  15    0.68    0.12 
  -1   1 -15    0.61    0.14 
   1  -1  15    0.78    0.13 
  -1  -1 -15    0.92    0.15 
  -1   1 -16    0.67    0.16 
   1   2 -16    0.22    0.13 
  -1   2  16    0.17    0.10 
   1  -2 -16    0.26    0.12 
  -1  -2  16    0.30    0.11 
   1   2 -15    0.45    0.13 
  -1   2  15    0.43    0.11 
  -1  -2  15    0.23    0.09 
   1  -2 -15    0.40    0.12 
  -1   2  14    1.74    0.17 
   1   2 -14    1.95    0.20 
   1  -2 -14    1.78    0.18 
  -1  -2  14    1.66    0.16 
  -1   2  13    2.14    0.17 
   1   2 -13    2.50    0.20 
  -1  -2  13    2.23    0.16 
   1  -2 -13    2.32    0.19 
  -1   2  12    0.16    0.07 
   1   2 -12    0.28    0.10 
  -1  -2  12    0.19    0.07 
   1  -2 -12    0.24    0.09 
   1   2 -11    0.47    0.10 
  -1   2  11    0.38    0.08 
  -1  -2  11    0.47    0.09 
   1  -2 -11    0.31    0.09 
   1   2 -10    0.59    0.10 
  -1   2  10    0.50    0.08 
   1  -2 -10    0.62    0.10 
  -1  -2  10    0.72    0.07 
  -1  -2  10    0.59    0.08 
  -1   2   9    6.13    0.22 
   1   2  -9    6.37    0.17 
  -1   2   9    6.38    0.17 
   1   2  -9    6.34    0.23 
   1  -2  -9    6.10    0.17 
   1  -2  -9    6.41    0.23 
  -1  -2   9    6.33    0.18 
  -1  -2   9    6.47    0.21 
  -1   2   8    2.66    0.10 
  -1   2   8    2.38    0.13 
   1   2  -8    2.36    0.14 
   1   2  -8    2.62    0.10 
   1  -2  -8    2.33    0.10 
  -1  -2   8    2.58    0.11 
   1  -2  -8    2.43    0.14 
  -1  -2   8    2.57    0.13 
  -1   2   7   18.48    0.35 
   1   2  -7   18.36    0.40 
   1   2  -7   18.83    0.36 
  -1   2   7   18.23    0.40 
   1  -2  -7   18.77    0.36 
   1  -2  -7   18.53    0.40 
  -1  -2   7   18.70    0.37 
  -1  -2   7   18.45    0.40 
   1   2  -6    2.56    0.12 
  -1   2   6    2.47    0.11 
  -1   2   6    2.68    0.09 
   1   2  -6    2.71    0.09 
  -1  -2   6    2.53    0.10 
   1  -2  -6    2.52    0.12 
  -1  -2   6    2.51    0.10 
   1  -2  -6    2.58    0.09 
  -1   2   5    1.08    0.07 
   1   2  -5    1.05    0.08 
  -1   2   5    1.16    0.06 
   1   2  -5    1.15    0.06 
  -1  -2   5    1.05    0.07 
   1  -2  -5    1.12    0.08 
   1  -2  -5    1.17    0.06 
  -1  -2   5    1.08    0.07 
  -1   2   4    9.77    0.21 
   1   2  -4    9.46    0.22 
  -1   2   4    9.39    0.22 
  -1   2   4    9.99    0.20 
   1   2  -4    9.95    0.20 
  -1  -2   4    9.74    0.21 
   1  -2  -4    9.96    0.20 
  -1  -2   4    9.88    0.21 
  -1   2   3    3.39    0.09 
  -1   2   3    3.32    0.10 
   1   2  -3    3.27    0.11 
  -1   2   3    3.42    0.09 
  -1   2   3    3.31    0.10 
   1   2  -3    3.38    0.09 
  -1  -2   3    3.27    0.10 
  -1  -2   3    3.38    0.09 
  -1   2   2    2.89    0.08 
  -1   2   2    2.93    0.08 
  -1   2   2    2.86    0.08 
  -1   2   2    2.74    0.08 
   1   2  -2    2.87    0.09 
   1   2  -2    2.91    0.08 
  -1  -2   2    2.75    0.09 
  -1  -2   2    2.79    0.07 
  -1   2   1  259.93    4.33 
   1   2  -1  275.39    4.40 
  -1   2   1  268.31    4.31 
  -1   2   1  263.95    4.26 
   1   2  -1  265.58    4.32 
  -1  -2   1  255.42    4.32 
   1  -2  -1  267.08    4.40 
  -1  -2   1  263.33    4.25 
  -1   2   0  101.59    1.70 
  -1   2   0  105.73    1.72 
   1   2   0  103.57    1.71 
  -1   2   0  104.58    1.67 
   1   2   0  105.82    1.70 
  -1  -2   0  106.05    1.68 
   1  -2   0  106.34    1.67 
   1  -2   0  104.08    1.78 
   1   2   1    0.02    0.02 
   1   2   1    0.02    0.02 
   1   2   1    0.03    0.02 
  -1   2  -1    0.01    0.02 
  -1   2  -1    0.01    0.02 
   1  -2   1    0.01    0.02 
   1  -2   1    0.01    0.02 
  -1  -2  -1    0.02    0.02 
  -1   2  -2   12.08    0.24 
   1   2   2   12.11    0.24 
  -1   2  -2   12.13    0.23 
   1   2   2   12.33    0.22 
   1   2   2   11.91    0.23 
  -1  -2  -2   12.07    0.24 
   1  -2   2   12.13    0.23 
   1  -2   2   12.23    0.24 
   1   2   3    4.47    0.12 
  -1   2  -3    4.55    0.12 
   1   2   3    4.40    0.13 
   1   2   3    4.58    0.10 
  -1   2  -3    4.57    0.12 
   1  -2   3    4.84    0.13 
   1  -2   3    4.49    0.12 
  -1  -2  -3    4.38    0.12 
   1   2   4    2.07    0.09 
   1   2   4    2.03    0.06 
   1   2   4    2.10    0.09 
  -1   2  -4    2.08    0.09 
  -1   2  -4    2.08    0.09 
   1  -2   4    1.90    0.08 
  -1  -2  -4    2.06    0.08 
   1  -2   4    2.05    0.08 
   1   2   5    1.23    0.08 
   1   2   5    1.39    0.05 
   1   2   5    1.29    0.08 
  -1   2  -5    1.42    0.08 
  -1   2  -5    1.35    0.08 
   1  -2   5    1.48    0.07 
   1  -2   5    1.32    0.08 
  -1  -2  -5    1.41    0.08 
  -1   2  -6    0.28    0.05 
   1   2   6    0.28    0.05 
   1   2   6    0.29    0.03 
  -1   2  -6    0.27    0.05 
   1   2   6    0.30    0.05 
   1  -2   6    0.31    0.05 
   1  -2   6    0.34    0.04 
  -1  -2  -6    0.30    0.04 
   1   2   7    2.18    0.07 
  -1   2  -7    2.26    0.12 
   1   2   7    2.01    0.11 
  -1   2  -7    2.15    0.10 
   1  -2   7    2.08    0.11 
  -1  -2  -7    1.99    0.12 
   1  -2   7    2.02    0.09 
  -1  -2  -7    2.14    0.10 
  -1   2  -8    3.84    0.14 
  -1   2  -8    3.74    0.17 
   1   2   8    3.61    0.16 
  -1  -2  -8    3.78    0.14 
  -1  -2  -8    3.91    0.17 
   1  -2   8    3.65    0.16 
   1  -2   8    4.04    0.13 
  -1   2  -9    0.35    0.06 
  -1   2  -9    0.26    0.08 
   1   2   9    0.21    0.06 
   1  -2   9    0.27    0.05 
  -1  -2  -9    0.21    0.06 
  -1  -2  -9    0.11    0.07 
   1  -2   9    0.23    0.06 
   1   2  10    1.49    0.13 
  -1   2 -10    1.63    0.11 
  -1   2 -10    1.25    0.13 
   1  -2  10    1.34    0.12 
  -1  -2 -10    1.49    0.11 
  -1  -2 -10    1.49    0.15 
   1   2  11    1.38    0.13 
  -1   2 -11    1.45    0.16 
  -1  -2 -11    1.08    0.13 
   1  -2  11    1.15    0.12 
   1   2  12    0.25    0.08 
  -1   2 -12    0.05    0.09 
   1  -2  12    0.07    0.07 
  -1  -2 -12    0.14    0.09 
  -1   2 -13    6.52    0.29 
   1   2  13    6.52    0.28 
   1  -2  13    6.21    0.27 
  -1  -2 -13    6.99    0.29 
   1   2  14    2.54    0.20 
  -1   2 -14    2.71    0.22 
   1  -2  14    2.32    0.18 
  -1  -2 -14    2.39    0.21 
   1   2  15    0.08    0.09 
  -1   2 -15    0.25    0.12 
  -1  -2 -15    0.17    0.12 
   1  -2  15    0.26    0.10 
  -1   2 -16    0.27    0.14 
   1   3 -16    0.16    0.12 
  -1   3  16    0.20    0.12 
  -1  -3  16    0.04    0.08 
   1  -3 -16    0.18    0.13 
   1   3 -15    0.27    0.13 
  -1   3  15    0.45    0.12 
  -1  -3  15    0.37    0.10 
   1  -3 -15    0.31    0.12 
  -1   3  14    0.43    0.11 
   1   3 -14    0.46    0.13 
  -1  -3  14    0.64    0.11 
   1  -3 -14    0.45    0.12 
   1   3 -13    1.76    0.19 
  -1   3  13    1.64    0.16 
  -1  -3  13    1.88    0.15 
   1  -3 -13    1.85    0.18 
  -1   3  12    6.21    0.26 
   1   3 -12    6.34    0.27 
  -1  -3  12    6.41    0.25 
   1  -3 -12    6.09    0.26 
  -1   3  11    4.70    0.21 
   1   3 -11    4.34    0.22 
  -1  -3  11    4.66    0.17 
   1  -3 -11    4.41    0.21 
  -1  -3  11    4.61    0.20 
   1   3 -10    9.45    0.30 
  -1   3  10    9.61    0.30 
  -1  -3  10    9.78    0.26 
   1  -3 -10    9.44    0.30 
  -1  -3  10    9.30    0.28 
   1   3  -9    3.69    0.13 
  -1   3   9    3.63    0.13 
  -1   3   9    3.12    0.16 
   1   3  -9    3.67    0.19 
   1  -3  -9    3.67    0.13 
   1  -3  -9    3.62    0.18 
  -1  -3   9    3.73    0.16 
  -1  -3   9    3.26    0.14 
  -1   3   8    0.12    0.05 
   1   3  -8    0.18    0.05 
  -1   3   8    0.20    0.04 
   1   3  -8    0.20    0.07 
   1  -3  -8    0.15    0.05 
   1  -3  -8    0.03    0.06 
  -1  -3   8    0.16    0.05 
  -1  -3   8    0.18    0.05 
   1   3  -7    5.61    0.15 
   1   3  -7    5.43    0.19 
  -1   3   7    5.61    0.15 
  -1   3   7    5.53    0.18 
   1  -3  -7    5.56    0.15 
   1  -3  -7    5.54    0.19 
  -1  -3   7    5.56    0.16 
  -1  -3   7    5.67    0.17 
   1   3  -6    0.02    0.05 
  -1   3   6    0.02    0.03 
  -1   3   6   -0.02    0.04 
   1   3  -6    0.04    0.03 
   1  -3  -6    0.06    0.03 
   1  -3  -6   -0.01    0.04 
  -1  -3   6    0.03    0.03 
  -1  -3   6    0.03    0.03 
  -1   3   5    9.53    0.23 
  -1   3   5    9.63    0.21 
  -1   3   5    9.51    0.23 
   1   3  -5    9.52    0.21 
   1   3  -5    9.61    0.23 
  -1  -3   5    9.30    0.22 
  -1  -3   5    9.45    0.22 
   1  -3  -5    9.65    0.21 
   1   3  -4   16.89    0.32 
  -1   3   4   16.88    0.32 
  -1   3   4   17.02    0.34 
   1   3  -4   16.68    0.34 
  -1   3   4   17.09    0.33 
  -1   3   4   16.73    0.32 
  -1  -3   4   16.98    0.33 
  -1  -3   4   16.63    0.33 
  -1   3   3   21.66    0.39 
  -1   3   3   21.15    0.39 
  -1   3   3   21.20    0.41 
   1   3  -3   21.37    0.40 
  -1   3   3   21.45    0.40 
   1   3  -3   22.01    0.40 
  -1  -3   3   21.91    0.39 
  -1  -3   3   21.40    0.40 
  -1   3   2   15.41    0.29 
  -1   3   2   15.69    0.29 
   1   3  -2   14.99    0.29 
  -1   3   2   15.04    0.29 
  -1   3   2   15.81    0.30 
   1   3  -2   15.10    0.30 
  -1  -3   2   15.17    0.30 
  -1  -3   2   15.25    0.27 
  -1   3   1    0.59    0.04 
   1   3  -1    0.58    0.05 
  -1   3   1    0.61    0.06 
   1   3  -1    0.68    0.06 
  -1   3   1    0.67    0.06 
  -1  -3   1    0.60    0.06 
   1  -3  -1    0.65    0.05 
  -1   3   0   10.07    0.19 
   1   3   0    9.76    0.20 
   1   3   0    9.57    0.21 
  -1   3   0    9.67    0.21 
  -1  -3   0    9.62    0.17 
   1  -3   0   10.20    0.20 
  -1  -3   0    9.84    0.20 
   1  -3   0    9.86    0.20 
   1   3   1   13.61    0.27 
   1   3   1   13.66    0.25 
  -1   3  -1   13.23    0.25 
   1   3   1   13.60    0.26 
  -1   3  -1   13.09    0.27 
  -1  -3  -1   13.71    0.26 
   1  -3   1   13.06    0.26 
   1  -3   1   13.82    0.26 
   1   3   2   38.72    0.68 
   1   3   2   38.85    0.67 
   1   3   2   39.65    0.67 
  -1   3  -2   39.50    0.66 
  -1   3  -2   38.74    0.68 
  -1  -3  -2   38.53    0.65 
   1  -3   2   39.76    0.68 
   1  -3   2   38.67    0.67 
   1   3   3   16.64    0.30 
  -1   3  -3   16.59    0.32 
   1   3   3   16.17    0.32 
   1   3   3   16.49    0.32 
  -1   3  -3   16.03    0.31 
  -1  -3  -3   16.38    0.32 
   1  -3   3   15.93    0.31 
   1  -3   3   16.72    0.32 
   1   3   4    1.97    0.07 
  -1   3  -4    1.96    0.09 
   1   3   4    1.88    0.09 
   1   3   4    1.76    0.09 
  -1   3  -4    1.91    0.09 
   1  -3   4    2.11    0.09 
   1  -3   4    1.95    0.08 
  -1  -3  -4    1.99    0.09 
   1   3   5    2.81    0.08 
  -1   3  -5    2.79    0.11 
  -1   3  -5    2.83    0.12 
   1   3   5    2.74    0.11 
   1   3   5    2.69    0.11 
  -1  -3  -5    2.75    0.11 
   1  -3   5    3.01    0.11 
   1  -3   5    2.79    0.11 
   1   3   6   12.43    0.30 
   1   3   6   13.14    0.25 
   1   3   6   12.71    0.30 
  -1   3  -6   13.01    0.28 
  -1   3  -6   12.93    0.30 
   1  -3   6   12.85    0.28 
  -1  -3  -6   13.01    0.28 
   1  -3   6   12.77    0.30 
  -1   3  -7    2.19    0.11 
   1   3   7    1.89    0.11 
   1   3   7    2.09    0.12 
  -1   3  -7    1.94    0.12 
   1   3   7    2.14    0.08 
   1  -3   7    1.96    0.11 
  -1  -3  -7    2.00    0.11 
   1  -3   7    2.04    0.10 
   1   3   8   23.48    0.52 
  -1   3  -8   24.74    0.48 
  -1   3  -8   24.09    0.51 
  -1  -3  -8   23.21    0.51 
   1  -3   8   24.87    0.52 
   1  -3   8   24.24    0.47 
  -1  -3  -8   23.66    0.48 
   1   3   9    0.67    0.09 
  -1   3  -9    0.59    0.07 
  -1   3  -9    0.74    0.10 
   1  -3   9    0.53    0.08 
  -1  -3  -9    0.65    0.09 
  -1  -3  -9    0.64    0.07 
   1  -3   9    0.60    0.07 
   1   3  10    2.92    0.17 
  -1   3 -10    2.92    0.14 
  -1   3 -10    2.95    0.17 
   1  -3  10    2.79    0.16 
  -1  -3 -10    2.82    0.14 
  -1  -3 -10    2.80    0.17 
  -1   3 -11    0.30    0.10 
   1   3  11    0.22    0.08 
   1  -3  11    0.14    0.07 
  -1  -3 -11    0.21    0.08 
  -1   3 -12    0.03    0.09 
   1   3  12    0.03    0.07 
  -1  -3 -12    0.10    0.09 
   1  -3  12    0.04    0.06 
   1   3  13    0.11    0.08 
  -1   3 -13    0.01    0.09 
   1  -3  13    0.13    0.07 
  -1  -3 -13    0.23    0.10 
  -1   3 -14    0.27    0.12 
   1   3  14    0.40    0.11 
   1  -3  14    0.13    0.08 
  -1  -3 -14    0.33    0.11 
  -1   3 -15    4.19    0.27 
   1   3  15    3.79    0.25 
   1  -3  15    4.21    0.24 
  -1  -3 -15    4.38    0.27 
  -1   3 -16    2.97    0.27 
   1   4 -16    0.16    0.13 
  -1  -4  16    0.15    0.10 
  -1   4  15    0.61    0.13 
   1   4 -15    0.79    0.16 
   1  -4 -15    0.79    0.15 
  -1  -4  15    0.88    0.13 
  -1   4  14    0.32    0.10 
   1   4 -14    0.27    0.12 
   1  -4 -14    0.35    0.11 
  -1  -4  14    0.30    0.09 
  -1   4  13    0.37    0.10 
   1   4 -13    0.45    0.12 
   1  -4 -13    0.14    0.09 
  -1  -4  13    0.39    0.09 
  -1   4  12    0.04    0.07 
   1   4 -12    0.08    0.09 
   1  -4 -12    0.07    0.09 
  -1  -4  12    0.09    0.06 
   1   4 -11    6.72    0.27 
  -1   4  11    6.62    0.26 
  -1  -4  11    6.60    0.22 
  -1  -4  11    6.59    0.24 
   1  -4 -11    6.39    0.26 
   1   4 -10    0.87    0.11 
  -1   4  10    0.79    0.10 
  -1  -4  10    0.88    0.10 
  -1  -4  10    0.95    0.10 
   1  -4 -10    0.90    0.11 
   1   4  -9    0.00    0.08 
   1   4  -9    0.04    0.05 
  -1   4   9    0.03    0.06 
  -1  -4   9    0.01    0.05 
  -1  -4   9    0.03    0.05 
   1  -4  -9    0.03    0.04 
   1  -4  -9    0.00    0.07 
  -1   4   8    4.84    0.15 
  -1   4   8    4.57    0.18 
   1   4  -8    4.81    0.16 
   1   4  -8    4.43    0.19 
   1  -4  -8    4.76    0.19 
   1  -4  -8    4.64    0.16 
  -1  -4   8    4.72    0.17 
  -1  -4   8    5.10    0.17 
  -1   4   7    2.73    0.10 
   1   4  -7    2.61    0.14 
   1   4  -7    2.40    0.11 
  -1   4   7    2.54    0.13 
  -1   4   7    2.54    0.13 
  -1  -4   7    2.55    0.12 
  -1  -4   7    2.61    0.12 
   1  -4  -7    2.56    0.11 
   1   4  -6    0.05    0.04 
   1   4  -6    0.07    0.05 
  -1   4   6    0.03    0.04 
  -1   4   6   -0.01    0.04 
  -1   4   6    0.08    0.03 
   1  -4  -6    0.05    0.04 
  -1  -4   6    0.07    0.04 
  -1  -4   6    0.00    0.03 
   1   4  -5    4.57    0.16 
  -1   4   5    4.90    0.14 
  -1   4   5    4.95    0.14 
   1   4  -5    4.80    0.14 
  -1   4   5    4.81    0.15 
  -1   4   5    5.00    0.15 
  -1  -4   5    4.78    0.14 
  -1  -4   5    4.61    0.15 
  -1   4   4    1.30    0.08 
  -1   4   4    1.24    0.07 
  -1   4   4    1.48    0.08 
   1   4  -4    1.18    0.09 
  -1   4   4    1.30    0.08 
   1   4  -4    1.15    0.07 
  -1  -4   4    1.34    0.08 
  -1  -4   4    1.23    0.06 
  -1   4   3    1.19    0.07 
  -1   4   3    0.96    0.07 
  -1   4   3    1.07    0.07 
  -1   4   3    1.12    0.07 
   1   4  -3    1.12    0.07 
   1   4  -3    1.07    0.08 
  -1  -4   3    1.07    0.05 
  -1  -4   3    1.12    0.08 
  -1   4   2   22.24    0.42 
   1   4  -2   22.32    0.43 
  -1   4   2   23.29    0.42 
  -1   4   2   22.74    0.41 
   1   4  -2   22.78    0.42 
  -1   4   2   22.76    0.43 
  -1  -4   2   22.07    0.42 
  -1  -4   2   22.60    0.39 
   1   4  -1    0.62    0.06 
  -1   4   1    0.67    0.05 
  -1   4   1    0.74    0.06 
   1   4  -1    0.69    0.06 
  -1  -4   1    0.63    0.03 
   1  -4  -1    0.69    0.07 
   1  -4  -1    0.67    0.05 
  -1  -4   1    0.75    0.07 
   1   4   0    4.45    0.12 
  -1   4   0    4.47    0.11 
   1   4   0    4.52    0.13 
  -1   4   0    4.30    0.13 
  -1  -4   0    4.45    0.09 
   1  -4   0    4.42    0.13 
   1  -4   0    4.57    0.11 
  -1  -4   0    4.42    0.13 
  -1   4  -1    0.02    0.03 
   1   4   1    0.03    0.03 
   1   4   1    0.01    0.02 
  -1   4  -1    0.08    0.04 
   1   4   1    0.02    0.03 
   1  -4   1    0.03    0.03 
   1  -4   1    0.09    0.04 
  -1  -4  -1    0.01    0.03 
  -1   4  -2    0.01    0.03 
   1   4   2    0.00    0.02 
   1   4   2    0.01    0.03 
   1   4   2   -0.01    0.03 
  -1   4  -2    0.01    0.03 
  -1  -4  -2    0.00    0.03 
   1  -4   2    0.07    0.04 
   1  -4   2    0.02    0.03 
   1   4   3    0.35    0.05 
  -1   4  -3    0.37    0.05 
  -1   4  -3    0.35    0.05 
   1   4   3    0.35    0.04 
   1   4   3    0.33    0.05 
  -1  -4  -3    0.47    0.05 
   1  -4   3    0.46    0.06 
   1  -4   3    0.43    0.05 
  -1   4  -4    1.97    0.10 
   1   4   4    1.91    0.09 
   1   4   4    1.75    0.08 
   1   4   4    1.74    0.09 
  -1   4  -4    1.84    0.09 
  -1  -4  -4    1.88    0.10 
   1  -4   4    1.56    0.09 
   1  -4   4    1.77    0.08 
   1   4   5    0.88    0.08 
  -1   4  -5    0.99    0.08 
   1   4   5    0.90    0.06 
   1   4   5    1.07    0.08 
  -1   4  -5    0.88    0.09 
   1  -4   5    0.93    0.08 
  -1  -4  -5    0.89    0.08 
   1  -4   5    0.89    0.07 
  -1   4  -6   28.44    0.55 
  -1   4  -6   28.23    0.55 
   1   4   6   27.95    0.56 
   1   4   6   28.56    0.57 
   1   4   6   28.54    0.50 
   1  -4   6   28.77    0.56 
   1  -4   6   28.78    0.54 
  -1  -4  -6   28.75    0.55 
   1   4   7    1.84    0.12 
  -1   4  -7    1.91    0.13 
   1   4   7    1.89    0.08 
   1   4   7    1.83    0.12 
  -1   4  -7    2.20    0.11 
  -1  -4  -7    1.80    0.11 
   1  -4   7    2.09    0.11 
   1  -4   7    1.96    0.11 
   1   4   8    1.16    0.11 
  -1   4  -8    0.98    0.10 
   1   4   8    1.27    0.11 
  -1   4  -8    1.26    0.10 
  -1  -4  -8    1.25    0.10 
   1  -4   8    1.18    0.10 
   1  -4   8    1.27    0.10 
  -1   4  -9    5.20    0.21 
  -1   4  -9    5.27    0.19 
   1   4   9    5.27    0.21 
  -1  -4  -9    5.28    0.19 
   1  -4   9    5.36    0.18 
   1  -4   9    5.31    0.20 
  -1  -4  -9    5.28    0.22 
   1   4  10    0.39    0.09 
  -1   4 -10    0.58    0.10 
  -1   4 -10    0.28    0.07 
   1  -4  10    0.40    0.08 
  -1  -4 -10    0.36    0.07 
  -1  -4 -10    0.41    0.09 
  -1   4 -11    0.11    0.09 
   1   4  11    0.10    0.08 
  -1  -4 -11    0.29    0.09 
   1  -4  11    0.10    0.06 
   1   4  12    0.23    0.09 
  -1   4 -12    0.39    0.11 
  -1  -4 -12    0.29    0.10 
   1  -4  12    0.39    0.09 
   1   4  13    0.09    0.08 
  -1   4 -13    0.10    0.10 
   1  -4  13    0.13    0.08 
  -1  -4 -13    0.00    0.08 
  -1   4 -14   -0.01    0.10 
   1   4  14    0.09    0.08 
   1  -4  14    0.13    0.08 
  -1  -4 -14    0.14    0.10 
  -1   4 -15    0.74    0.15 
   1   4  15    0.58    0.13 
   1  -4  15    0.64    0.12 
  -1  -4 -15    0.36    0.13 
  -1  -5  16    0.01    0.09 
   1   5 -15   -0.15    0.11 
  -1   5  15    0.06    0.09 
  -1  -5  15   -0.06    0.08 
   1  -5 -15   -0.01    0.10 
   1   5 -14    0.35    0.13 
  -1   5  14    0.33    0.11 
   1  -5 -14    0.50    0.12 
  -1  -5  14    0.31    0.09 
   1   5 -13    0.04    0.10 
  -1   5  13    0.18    0.08 
   1  -5 -13   -0.05    0.08 
  -1  -5  13    0.15    0.07 
  -1   5  12    0.07    0.07 
   1   5 -12    0.09    0.10 
  -1  -5  12    0.01    0.06 
   1  -5 -12    0.12    0.09 
  -1   5  11    0.23    0.08 
   1   5 -11    0.17    0.09 
  -1  -5  11    0.26    0.07 
   1  -5 -11    0.26    0.09 
  -1  -5  11    0.14    0.07 
  -1   5  10    3.74    0.19 
   1   5 -10    3.99    0.21 
  -1  -5  10    3.78    0.17 
   1  -5 -10    3.75    0.20 
  -1  -5  10    3.81    0.17 
   1   5  -9    0.75    0.11 
  -1   5   9    0.80    0.10 
   1   5  -9    0.82    0.08 
  -1  -5   9    0.74    0.09 
   1  -5  -9    0.75    0.08 
  -1  -5   9    0.92    0.10 
   1  -5  -9    0.94    0.11 
   1   5  -8    1.50    0.10 
  -1   5   8    1.46    0.12 
  -1   5   8    1.46    0.09 
   1   5  -8    1.59    0.15 
  -1   5   8    1.70    0.12 
  -1  -5   8    1.52    0.11 
  -1  -5   8    1.63    0.11 
   1  -5  -8    1.62    0.13 
   1  -5  -8    1.50    0.11 
   1   5  -7    0.90    0.09 
  -1   5   7    0.79    0.08 
  -1   5   7    0.83    0.09 
  -1   5   7    0.80    0.09 
   1   5  -7    1.27    0.13 
  -1  -5   7    0.81    0.08 
   1  -5  -7    0.80    0.09 
  -1  -5   7    0.84    0.09 
   1   5  -6    0.47    0.08 
  -1   5   6    0.53    0.07 
  -1   5   6    0.58    0.06 
  -1   5   6    0.56    0.07 
   1   5  -6    0.35    0.06 
  -1  -5   6    0.60    0.07 
  -1  -5   6    0.54    0.06 
   1  -5  -6    0.49    0.07 
  -1   5   5    0.13    0.04 
  -1   5   5    0.16    0.05 
  -1   5   5    0.22    0.05 
   1   5  -5    0.10    0.05 
  -1   5   5    0.18    0.04 
   1   5  -5    0.14    0.04 
  -1  -5   5    0.21    0.05 
  -1  -5   5    0.18    0.04 
  -1   5   4    0.40    0.05 
   1   5  -4    0.41    0.06 
  -1   5   4    0.32    0.05 
  -1   5   4    0.42    0.05 
  -1   5   4    0.42    0.05 
   1   5  -4    0.41    0.06 
  -1  -5   4    0.36    0.06 
  -1  -5   4    0.40    0.05 
  -1   5   3    2.15    0.10 
   1   5  -3    2.03    0.10 
   1   5  -3    1.95    0.10 
  -1   5   3    2.11    0.09 
  -1   5   3    2.00    0.09 
  -1   5   3    2.00    0.09 
  -1  -5   3    2.15    0.07 
  -1  -5   3    1.85    0.10 
   1   5  -2    5.62    0.16 
  -1   5   2    5.61    0.15 
  -1   5   2    5.35    0.16 
   1   5  -2    5.52    0.16 
   1  -5  -2    5.55    0.16 
  -1  -5   2    5.61    0.16 
   1  -5  -2    5.87    0.15 
  -1  -5   2    5.78    0.12 
  -1   5   1    5.44    0.14 
   1   5  -1    5.77    0.15 
  -1   5   1    5.08    0.16 
   1   5  -1    5.38    0.16 
  -1  -5   1    5.67    0.11 
  -1  -5   1    5.74    0.16 
   1  -5  -1    5.47    0.14 
   1  -5  -1    4.91    0.15 
   1   5   0  112.28    1.87 
  -1   5   0  114.30    1.86 
  -1   5   0  110.95    1.90 
   1   5   0  112.51    1.90 
   1  -5   0  113.40    1.86 
  -1  -5   0  114.68    1.86 
   1  -5   0  116.63    1.89 
  -1  -5   0  116.48    1.87 
  -1   5  -1  109.97    1.87 
   1   5   1  111.37    1.88 
   1   5   1  114.19    1.86 
  -1   5  -1  110.97    1.84 
   1  -5   1  110.69    1.84 
  -1  -5  -1  116.16    1.86 
   1  -5   1  114.43    1.87 
  -1  -5  -1  112.07    1.83 
  -1   5  -2    3.45    0.13 
   1   5   2    3.66    0.13 
   1   5   2    3.65    0.12 
  -1   5  -2    3.48    0.11 
   1   5   2    3.75    0.11 
   1  -5   2    3.64    0.11 
  -1  -5  -2    3.59    0.12 
   1  -5   2    3.37    0.13 
  -1   5  -3    1.74    0.09 
  -1   5  -3    1.82    0.10 
   1   5   3    1.80    0.08 
   1   5   3    1.72    0.09 
   1   5   3    1.81    0.09 
   1  -5   3    1.85    0.08 
   1  -5   3    1.67    0.10 
  -1  -5  -3    1.67    0.09 
  -1   5  -4    3.84    0.14 
   1   5   4    3.72    0.13 
  -1   5  -4    3.70    0.14 
   1   5   4    3.59    0.14 
   1   5   4    3.85    0.14 
   1  -5   4    3.96    0.13 
  -1  -5  -4    3.74    0.12 
   1  -5   4    3.73    0.14 
  -1   5  -5    1.16    0.09 
  -1   5  -5    0.92    0.10 
   1   5   5    0.99    0.09 
   1   5   5    1.20    0.08 
  -1  -5  -5    1.21    0.08 
   1  -5   5    1.19    0.10 
  -1  -5  -5    1.09    0.09 
   1  -5   5    1.06    0.08 
   1   5   6    2.52    0.13 
   1   5   6    2.48    0.12 
  -1   5  -6    2.50    0.14 
   1   5   6    2.60    0.10 
  -1   5  -6    2.52    0.12 
   1  -5   6    2.39    0.12 
   1  -5   6    2.11    0.11 
  -1  -5  -6    2.61    0.13 
  -1   5  -7    6.74    0.21 
   1   5   7    6.67    0.22 
  -1   5  -7    6.52    0.22 
   1   5   7    6.67    0.17 
   1   5   7    6.64    0.21 
   1  -5   7    6.99    0.21 
   1  -5   7    6.38    0.20 
  -1  -5  -7    6.54    0.21 
   1   5   8    0.62    0.09 
   1   5   8    0.70    0.09 
  -1   5  -8    0.70    0.10 
  -1   5  -8    0.64    0.08 
  -1  -5  -8    0.57    0.08 
   1  -5   8    0.65    0.08 
   1  -5   8    0.66    0.08 
   1   5   9    6.74    0.24 
  -1   5  -9    6.79    0.22 
   1   5   9    6.66    0.24 
  -1   5  -9    6.87    0.25 
   1  -5   9    6.77    0.23 
   1  -5   9    6.72    0.22 
  -1  -5  -9    6.59    0.22 
  -1   5 -10    0.78    0.09 
   1   5  10    0.79    0.10 
  -1   5 -10    0.60    0.11 
   1  -5  10    0.75    0.09 
  -1  -5 -10    0.63    0.10 
   1  -5  10    0.75    0.10 
  -1  -5 -10    0.66    0.09 
  -1   5 -11    0.10    0.09 
   1   5  11    0.13    0.07 
  -1  -5 -11    0.08    0.08 
   1  -5  11    0.21    0.07 
   1   5  12    0.16    0.08 
  -1   5 -12    0.30    0.11 
  -1  -5 -12    0.22    0.10 
   1  -5  12    0.11    0.07 
  -1   5 -13    0.25    0.11 
   1   5  13    0.28    0.10 
   1  -5  13    0.20    0.08 
  -1  -5 -13    0.05    0.09 
   1   5  14    0.49    0.12 
  -1   5 -14    0.37    0.13 
   1  -5  14    0.49    0.10 
  -1  -5 -14    0.59    0.13 
   1   5  15    0.08    0.10 
  -1   5 -15    0.04    0.12 
   1  -5  15    0.23    0.10 
   1   6 -15   -0.07    0.12 
  -1   6  15    0.03    0.09 
   1  -6 -15    0.05    0.11 
   1   6 -14    0.17    0.12 
  -1   6  14   -0.03    0.08 
   1  -6 -14    0.03    0.10 
  -1   6  13    0.03    0.08 
   1   6 -13   -0.04    0.10 
   1  -6 -13    0.08    0.09 
  -1  -6  13   -0.04    0.06 
   1   6 -12    2.03    0.20 
  -1   6  12    2.04    0.17 
   1  -6 -12    2.05    0.18 
  -1  -6  12    2.15    0.15 
   1   6 -11    4.37    0.23 
  -1   6  11    4.36    0.22 
   1  -6 -11    4.40    0.22 
  -1  -6  11    4.00    0.19 
  -1  -6  11    4.41    0.19 
   1   6 -10    0.96    0.13 
  -1   6  10    0.76    0.11 
  -1  -6  10    0.79    0.10 
   1  -6 -10    0.64    0.10 
  -1  -6  10    0.66    0.10 
  -1   6   9    0.50    0.09 
   1   6  -9    0.36    0.07 
   1   6  -9    0.38    0.10 
   1  -6  -9    0.40    0.09 
   1  -6  -9    0.41    0.07 
  -1  -6   9    0.56    0.08 
  -1  -6   9    0.53    0.09 
  -1   6   8    2.03    0.11 
   1   6  -8    2.34    0.17 
   1   6  -8    2.01    0.12 
  -1   6   8    1.76    0.13 
  -1   6   8    1.99    0.14 
   1  -6  -8    2.18    0.13 
  -1  -6   8    2.13    0.12 
  -1  -6   8    1.91    0.13 
  -1   6   7    5.96    0.18 
  -1   6   7    6.23    0.21 
  -1   6   7    6.28    0.21 
   1   6  -7    6.21    0.20 
   1   6  -7    5.89    0.22 
   1  -6  -7    5.86    0.20 
  -1  -6   7    6.43    0.19 
  -1  -6   7    6.00    0.21 
  -1   6   6    0.16    0.05 
   1   6  -6    0.13    0.05 
  -1   6   6    0.04    0.05 
  -1   6   6    0.05    0.05 
   1   6  -6    0.01    0.06 
  -1   6   6    0.02    0.04 
  -1  -6   6    0.13    0.06 
  -1  -6   6    0.10    0.04 
  -1   6   5    0.55    0.07 
   1   6  -5    0.40    0.06 
  -1   6   5    0.48    0.07 
  -1   6   5    0.48    0.06 
   1   6  -5    0.39    0.07 
  -1   6   5    0.47    0.06 
  -1  -6   5    0.45    0.05 
  -1  -6   5    0.58    0.08 
  -1   6   4    3.55    0.14 
   1   6  -4    3.61    0.15 
  -1   6   4    3.65    0.13 
  -1   6   4    3.73    0.14 
  -1   6   4    3.71    0.13 
   1   6  -4    3.47    0.14 
  -1  -6   4    3.64    0.15 
  -1  -6   4    3.55    0.11 
  -1   6   3    1.73    0.10 
   1   6  -3    1.72    0.10 
   1   6  -3    1.76    0.10 
  -1   6   3    1.62    0.09 
   1  -6  -3    1.78    0.10 
  -1  -6   3    1.76    0.11 
  -1  -6   3    1.71    0.06 
   1  -6  -3    1.91    0.09 
   1   6  -2    0.33    0.06 
  -1   6   2    0.26    0.05 
  -1   6   2    0.39    0.05 
   1   6  -2    0.31    0.05 
  -1  -6   2    0.41    0.03 
   1  -6  -2    0.42    0.06 
  -1  -6   2    0.28    0.06 
   1  -6  -2    0.39    0.05 
   1   6  -1    0.07    0.04 
  -1   6   1    0.09    0.04 
   1   6  -1    0.03    0.04 
  -1   6   1    0.09    0.03 
   1  -6  -1    0.08    0.03 
  -1  -6   1    0.06    0.05 
   1  -6  -1    0.11    0.05 
  -1  -6   1    0.09    0.02 
  -1   6   0   14.24    0.32 
  -1   6   0   14.25    0.29 
   1   6   0   14.18    0.30 
   1   6   0   13.71    0.32 
  -1  -6   0   14.37    0.31 
  -1  -6   0   15.20    0.26 
   1  -6   0   14.15    0.29 
   1  -6   0   13.78    0.31 
  -1   6  -1    4.26    0.13 
  -1   6  -1    4.29    0.16 
   1   6   1    4.77    0.15 
   1   6   1    4.61    0.16 
   1  -6   1    4.68    0.13 
   1  -6   1    4.47    0.15 
  -1  -6  -1    4.61    0.15 
  -1  -6  -1    4.76    0.12 
   1   6   2    6.92    0.19 
  -1   6  -2    6.73    0.20 
   1   6   2    6.84    0.20 
  -1   6  -2    6.91    0.18 
   1   6   2    7.23    0.17 
   1  -6   2    7.38    0.17 
   1  -6   2    7.14    0.20 
  -1  -6  -2    7.12    0.19 
   1   6   3    3.91    0.15 
  -1   6  -3    3.98    0.15 
   1   6   3    3.83    0.14 
   1   6   3    4.00    0.12 
  -1   6  -3    3.90    0.14 
  -1  -6  -3    3.96    0.14 
   1  -6   3    3.58    0.15 
   1  -6   3    4.07    0.12 
   1   6   4    0.25    0.05 
  -1   6  -4    0.09    0.05 
   1   6   4    0.19    0.05 
  -1   6  -4    0.19    0.06 
   1   6   4    0.26    0.06 
   1  -6   4    0.19    0.04 
   1  -6   4    0.19    0.06 
  -1  -6  -4    0.18    0.05 
  -1   6  -5    0.09    0.05 
   1   6   5    0.08    0.04 
   1   6   5    0.11    0.05 
  -1   6  -5    0.19    0.06 
   1  -6   5    0.11    0.04 
  -1  -6  -5    0.19    0.05 
  -1  -6  -5    0.04    0.05 
   1  -6   5    0.06    0.06 
  -1   6  -6    1.71    0.12 
   1   6   6    1.65    0.11 
   1   6   6    1.82    0.11 
  -1   6  -6    1.76    0.13 
  -1  -6  -6    1.52    0.12 
   1  -6   6    1.79    0.10 
   1  -6   6    1.77    0.12 
  -1  -6  -6    1.68    0.10 
   1   6   7    0.73    0.09 
  -1   6  -7    0.55    0.08 
   1   6   7    0.54    0.08 
  -1   6  -7    0.78    0.10 
   1  -6   7    0.71    0.08 
   1  -6   7    0.79    0.09 
  -1  -6  -7    0.65    0.09 
  -1  -6  -7    0.74    0.07 
  -1   6  -8    0.24    0.09 
   1   6   8    0.26    0.07 
   1   6   8    0.22    0.07 
  -1   6  -8    0.16    0.06 
  -1  -6  -8    0.21    0.07 
   1  -6   8    0.24    0.07 
   1  -6   8    0.30    0.06 
  -1   6  -9    0.18    0.07 
  -1   6  -9    0.18    0.09 
   1   6   9    0.27    0.08 
   1   6   9    0.23    0.07 
   1  -6   9    0.21    0.06 
   1  -6   9    0.25    0.07 
  -1  -6  -9    0.19    0.07 
   1   6  10    0.20    0.08 
  -1   6 -10    0.18    0.10 
  -1   6 -10    0.19    0.07 
   1  -6  10    0.26    0.07 
  -1  -6 -10    0.15    0.07 
  -1  -6 -10    0.26    0.09 
   1  -6  10    0.13    0.07 
   1   6  11   -0.05    0.06 
  -1   6 -11   -0.10    0.09 
  -1  -6 -11    0.07    0.08 
   1  -6  11   -0.02    0.05 
   1   6  12    0.37    0.10 
  -1   6 -12    0.25    0.11 
  -1  -6 -12    0.20    0.10 
   1  -6  12    0.25    0.08 
  -1   6 -13    1.14    0.16 
   1   6  13    1.07    0.15 
  -1  -6 -13    1.24    0.16 
   1  -6  13    1.44    0.15 
   1   6  14    0.43    0.12 
  -1   6 -14    0.41    0.14 
  -1  -6 -14    0.42    0.13 
   1  -6  14    0.49    0.11 
  -1   6 -15    0.19    0.14 
   1   7 -15    0.07    0.13 
  -1   7  14    0.24    0.10 
   1   7 -14   -0.18    0.11 
   1  -7 -14    0.03    0.10 
  -1   7  13    0.13    0.09 
   1   7 -13   -0.06    0.11 
   1  -7 -13    0.03    0.09 
  -1   7  12    1.87    0.17 
   1   7 -12    1.44    0.17 
   1  -7 -12    2.10    0.19 
  -1  -7  12    2.08    0.16 
   1   7 -11    0.33    0.11 
  -1   7  11    0.25    0.09 
  -1  -7  11    0.35    0.09 
   1  -7 -11    0.47    0.10 
   1   7 -10    0.30    0.10 
  -1   7  10    0.44    0.09 
   1  -7 -10    0.25    0.09 
  -1  -7  10    0.38    0.09 
   1   7  -9    0.63    0.11 
  -1   7   9    0.65    0.10 
  -1   7   9    0.71    0.10 
   1   7  -9    0.75    0.10 
  -1  -7   9    0.59    0.09 
   1  -7  -9    0.75    0.09 
  -1   7   8    6.75    0.23 
   1   7  -8    6.76    0.26 
   1   7  -8    6.64    0.22 
  -1   7   8    6.77    0.24 
  -1  -7   8    6.70    0.24 
   1  -7  -8    6.61    0.23 
  -1   7   7    4.26    0.18 
  -1   7   7    4.53    0.17 
   1   7  -7    4.66    0.18 
  -1   7   7    4.50    0.18 
   1   7  -7    4.64    0.21 
  -1  -7   7    4.46    0.19 
   1  -7  -7    4.34    0.18 
   1   7  -6    0.25    0.08 
  -1   7   6    0.16    0.06 
   1   7  -6    0.23    0.06 
  -1   7   6    0.15    0.05 
  -1   7   6    0.14    0.06 
  -1   7   6    0.14    0.06 
  -1  -7   6    0.19    0.07 
   1   7  -5    3.51    0.16 
  -1   7   5    3.47    0.16 
  -1   7   5    3.60    0.14 
   1   7  -5    3.22    0.15 
  -1   7   5    3.53    0.15 
   1  -7  -5    3.49    0.15 
  -1  -7   5    3.33    0.16 
  -1   7   4    0.21    0.06 
   1   7  -4    0.10    0.05 
  -1   7   4    0.14    0.05 
   1   7  -4    0.16    0.06 
   1  -7  -4    0.12    0.05 
   1  -7  -4    0.19    0.06 
  -1  -7   4    0.08    0.06 
   1   7  -3    0.04    0.05 
  -1   7   3    0.14    0.06 
  -1   7   3    0.12    0.04 
   1   7  -3    0.12    0.05 
  -1  -7   3    0.11    0.06 
   1  -7  -3    0.15    0.06 
   1  -7  -3    0.06    0.04 
  -1   7   2    1.18    0.10 
  -1   7   2    1.03    0.08 
   1   7  -2    1.05    0.09 
   1   7  -2    0.94    0.09 
   1  -7  -2    1.04    0.09 
  -1  -7   2    1.05    0.10 
   1  -7  -2    0.87    0.08 
   1   7  -1    0.02    0.04 
  -1   7   1   -0.03    0.04 
  -1   7   1   -0.01    0.03 
   1   7  -1   -0.03    0.04 
   1  -7  -1    0.01    0.05 
  -1  -7   1    0.02    0.05 
   1  -7  -1    0.01    0.04 
   1   7   0    6.93    0.21 
  -1   7   0    6.63    0.21 
   1   7   0    6.64    0.19 
  -1   7   0    6.78    0.18 
   1  -7   0    6.97    0.21 
  -1  -7   0    6.77    0.21 
   1  -7   0    7.12    0.18 
  -1  -7   0    7.15    0.15 
  -1   7  -1    2.45    0.10 
  -1   7  -1    2.22    0.12 
   1   7   1    2.35    0.11 
   1   7   1    2.35    0.13 
  -1  -7  -1    2.39    0.08 
   1  -7   1    2.51    0.10 
  -1  -7  -1    2.49    0.12 
   1  -7   1    2.26    0.12 
  -1   7  -2    0.02    0.05 
   1   7   2    0.14    0.05 
  -1   7  -2    0.15    0.04 
   1   7   2    0.13    0.05 
   1  -7   2    0.15    0.06 
  -1  -7  -2    0.04    0.04 
   1  -7   2    0.07    0.04 
  -1  -7  -2    0.13    0.06 
  -1   7  -3    2.57    0.12 
   1   7   3    2.64    0.10 
  -1   7  -3    2.24    0.13 
   1   7   3    2.37    0.13 
   1   7   3    2.53    0.12 
  -1  -7  -3    2.47    0.13 
   1  -7   3    2.57    0.10 
   1  -7   3    2.38    0.14 
  -1   7  -4    1.31    0.11 
   1   7   4    1.37    0.11 
   1   7   4    1.39    0.10 
   1   7   4    1.25    0.09 
  -1   7  -4    1.47    0.11 
   1  -7   4    1.29    0.08 
  -1  -7  -4    1.13    0.10 
   1  -7   4    1.20    0.12 
   1   7   5    0.34    0.06 
  -1   7  -5    0.37    0.07 
   1   7   5    0.40    0.07 
   1   7   5    0.48    0.08 
  -1   7  -5    0.47    0.08 
  -1  -7  -5    0.43    0.07 
   1  -7   5    0.38    0.06 
   1  -7   5    0.48    0.08 
   1   7   6    0.68    0.09 
  -1   7  -6    0.76    0.10 
   1   7   6    0.85    0.09 
  -1   7  -6    0.77    0.09 
  -1  -7  -6    0.66    0.08 
  -1  -7  -6    0.66    0.09 
   1  -7   6    0.74    0.10 
   1  -7   6    0.70    0.08 
   1   7   7   11.56    0.32 
  -1   7  -7   11.71    0.32 
   1   7   7   11.83    0.31 
  -1   7  -7   11.52    0.32 
  -1  -7  -7   11.23    0.32 
   1  -7   7   11.79    0.32 
   1  -7   7   11.16    0.29 
   1   7   8    1.52    0.13 
  -1   7  -8    1.59    0.13 
   1   7   8    1.48    0.12 
  -1   7  -8    1.74    0.16 
  -1  -7  -8    1.39    0.13 
   1  -7   8    1.57    0.14 
   1  -7   8    1.78    0.12 
  -1   7  -9    3.19    0.19 
   1   7   9    3.48    0.19 
  -1   7  -9    3.44    0.18 
   1   7   9    3.64    0.18 
   1  -7   9    3.62    0.17 
   1  -7   9    3.54    0.18 
  -1  -7  -9    3.84    0.19 
   1   7  10    0.36    0.10 
   1   7  10    0.70    0.11 
  -1   7 -10    0.70    0.12 
  -1   7 -10    0.74    0.10 
  -1  -7 -10    0.73    0.10 
   1  -7  10    0.67    0.10 
   1  -7  10    0.70    0.10 
  -1   7 -11    0.40    0.11 
   1   7  11    0.24    0.09 
  -1  -7 -11    0.48    0.11 
   1   7  12    0.20    0.09 
  -1   7 -12    0.11    0.11 
  -1  -7 -12    0.11    0.09 
   1   7  13    0.13    0.09 
  -1  -7 -13    0.03    0.10 
   1   7  14    0.45    0.12 
  -1  -7 -14    0.59    0.15 
  -1   8  14    0.13    0.10 
   1   8 -14    0.19    0.14 
   1  -8 -14   -0.02    0.10 
  -1   8  13    0.27    0.10 
   1   8 -13    0.01    0.12 
   1  -8 -13    0.08    0.10 
   1   8 -12    0.80    0.15 
  -1   8  12    0.63    0.12 
  -1  -8  12    0.69    0.12 
   1  -8 -12    0.93    0.14 
   1   8 -11    0.07    0.10 
  -1   8  11   -0.04    0.07 
   1  -8 -11    0.00    0.08 
  -1  -8  11    0.08    0.08 
  -1   8  10    1.09    0.12 
   1   8 -10    0.76    0.13 
   1  -8 -10    1.02    0.13 
  -1  -8  10    1.00    0.12 
  -1   8   9    0.25    0.08 
   1   8  -9    0.19    0.09 
  -1   8   9    0.11    0.08 
   1   8  -9    0.08    0.07 
   1  -8  -9    0.08    0.07 
  -1  -8   9    0.08    0.08 
   1   8  -8   -0.09    0.05 
   1   8  -8   -0.03    0.08 
  -1   8   8    0.02    0.06 
  -1   8   8   -0.08    0.05 
   1  -8  -8    0.00    0.06 
   1  -8  -8    0.08    0.07 
  -1  -8   8   -0.01    0.06 
   1   8  -7    1.00    0.11 
  -1   8   7    0.81    0.10 
   1   8  -7    0.68    0.11 
  -1   8   7    0.97    0.11 
  -1   8   7    0.92    0.10 
  -1  -8   7    0.97    0.11 
   1  -8  -7    0.83    0.09 
  -1   8   6    8.43    0.25 
   1   8  -6    8.56    0.27 
  -1   8   6    7.91    0.26 
  -1   8   6    8.06    0.25 
   1   8  -6    8.07    0.25 
   1  -8  -6    8.00    0.24 
  -1  -8   6    7.83    0.27 
  -1   8   5    0.06    0.05 
   1   8  -5   -0.08    0.05 
   1   8  -5   -0.10    0.06 
  -1   8   5    0.00    0.05 
   1  -8  -5    0.17    0.06 
   1  -8  -5    0.03    0.06 
  -1  -8   5    0.03    0.07 
   1   8  -4    1.97    0.13 
   1   8  -4    1.92    0.13 
  -1   8   4    2.02    0.12 
  -1   8   4    2.16    0.14 
   1  -8  -4    2.16    0.12 
   1  -8  -4    2.00    0.13 
  -1  -8   4    1.92    0.14 
   1   8  -3    1.44    0.12 
   1   8  -3    1.44    0.11 
  -1   8   3    1.58    0.10 
  -1   8   3    1.48    0.12 
  -1  -8   3    1.38    0.12 
   1  -8  -3    1.35    0.12 
   1  -8  -3    1.38    0.10 
  -1   8   2    4.63    0.16 
   1   8  -2    4.28    0.18 
  -1   8   2    4.49    0.18 
   1   8  -2    4.53    0.16 
   1  -8  -2    4.27    0.18 
  -1  -8   2    4.58    0.19 
   1  -8  -2    4.48    0.15 
   1   8  -1    0.25    0.06 
  -1   8   1    0.21    0.05 
  -1   8   1    0.18    0.06 
   1   8  -1    0.26    0.06 
   1  -8  -1    0.29    0.07 
  -1  -8   1    0.12    0.06 
  -1   8   0    4.26    0.17 
   1   8   0    4.22    0.15 
   1   8   0    4.12    0.17 
  -1   8   0    4.07    0.14 
  -1  -8   0    3.92    0.17 
   1  -8   0    4.18    0.17 
  -1   8  -1    0.39    0.06 
   1   8   1    0.42    0.07 
  -1   8  -1    0.39    0.08 
   1   8   1    0.22    0.07 
   1  -8   1    0.34    0.07 
  -1  -8  -1    0.30    0.07 
  -1   8  -2    0.33    0.06 
   1   8   2    0.31    0.07 
   1   8   2    0.39    0.06 
  -1   8  -2    0.38    0.07 
  -1  -8  -2    0.38    0.07 
   1  -8   2    0.24    0.07 
  -1   8  -3    0.22    0.07 
   1   8   3    0.17    0.06 
   1   8   3    0.22    0.06 
  -1   8  -3    0.10    0.05 
   1  -8   3    0.18    0.07 
  -1  -8  -3    0.14    0.06 
  -1   8  -4    1.55    0.12 
  -1   8  -4    1.67    0.11 
   1   8   4    1.74    0.12 
   1   8   4    1.40    0.12 
  -1  -8  -4    1.58    0.12 
   1  -8   4    1.65    0.14 
  -1   8  -5    0.98    0.11 
  -1   8  -5    0.91    0.10 
   1   8   5    0.80    0.10 
   1   8   5    1.03    0.10 
   1  -8   5    1.01    0.11 
  -1  -8  -5    1.04    0.11 
  -1   8  -6    2.40    0.15 
  -1   8  -6    2.48    0.15 
   1   8   6    2.27    0.15 
  -1  -8  -6    2.45    0.14 
  -1  -8  -6    2.48    0.16 
   1  -8   6    2.43    0.16 
  -1   8  -7    5.06    0.21 
   1   8   7    5.08    0.21 
  -1   8  -7    5.20    0.22 
   1  -8   7    5.20    0.22 
  -1  -8  -7    5.51    0.22 
  -1   8  -8    3.52    0.18 
  -1   8  -8    3.37    0.19 
   1   8   8    3.23    0.18 
   1   8   8    3.65    0.17 
  -1  -8  -8    3.24    0.18 
   1  -8   8    3.49    0.19 
  -1   8  -9    3.10    0.18 
   1   8   9    3.16    0.19 
   1   8   9    3.32    0.18 
  -1  -8  -9    2.73    0.17 
   1  -8   9    2.63    0.18 
  -1   8 -10    2.27    0.16 
   1   8  10    2.19    0.18 
   1   8  10    2.20    0.17 
  -1  -8 -10    2.32    0.17 
   1  -8  10    2.05    0.16 
   1   8  11    4.50    0.24 
  -1  -8 -11    4.65    0.25 
   1  -8  11    4.47    0.25 
   1   8  12   -0.07    0.08 
  -1  -8 -12   -0.05    0.09 
   1   8  13    0.32    0.11 
  -1  -8 -13    0.25    0.12 
   1  -9 -13    0.05    0.10 
   1  -9 -12    0.12    0.11 
  -1  -9  12   -0.11    0.08 
  -1  -9  11   -0.05    0.08 
   1  -9 -11    0.24    0.09 
   1   9 -10    2.78    0.21 
   1  -9 -10    2.99    0.20 
  -1  -9  10    2.61    0.19 
   1   9  -9    0.32    0.09 
   1   9  -9    0.53    0.11 
  -1   9   9    0.35    0.09 
   1  -9  -9    0.29    0.09 
  -1  -9   9    0.30    0.09 
   1   9  -8    3.58    0.18 
  -1   9   8    3.44    0.19 
   1   9  -8    3.04    0.20 
  -1  -9   8    3.57    0.20 
   1  -9  -8    3.50    0.19 
  -1   9   7    3.51    0.18 
  -1   9   7    3.41    0.18 
   1   9  -7    3.10    0.17 
   1   9  -7    3.10    0.18 
   1  -9  -7    3.13    0.17 
  -1  -9   7    3.37    0.18 
   1   9  -6    2.56    0.16 
   1   9  -6    2.48    0.16 
  -1   9   6    2.49    0.16 
  -1   9   6    2.62    0.15 
   1  -9  -6    2.53    0.15 
  -1  -9   6    2.62    0.17 
   1   9  -5   13.24    0.34 
   1   9  -5   12.40    0.35 
  -1   9   5   12.48    0.32 
  -1   9   5   12.55    0.35 
   1  -9  -5   12.21    0.33 
  -1  -9   5   12.21    0.35 
  -1   9   4    5.78    0.20 
  -1   9   4    5.71    0.22 
   1   9  -4    5.63    0.20 
   1   9  -4    5.38    0.22 
   1  -9  -4    5.49    0.21 
  -1  -9   4    5.88    0.23 
  -1   9   3    0.90    0.10 
  -1   9   3    0.94    0.11 
   1   9  -3    0.91    0.10 
   1   9  -3    0.72    0.10 
   1  -9  -3    0.75    0.10 
  -1  -9   3    0.86    0.11 
  -1   9   2    0.24    0.06 
  -1   9   2    0.31    0.07 
   1   9  -2    0.25    0.06 
   1   9  -2    0.33    0.08 
   1  -9  -2    0.35    0.08 
  -1  -9   2    0.15    0.07 
   1   9  -1    1.91    0.14 
   1   9  -1    2.10    0.13 
  -1   9   1    2.33    0.12 
  -1   9   1    2.38    0.15 
  -1  -9   1    2.29    0.15 
   1  -9  -1    2.18    0.15 
   1   9   0    0.02    0.05 
  -1   9   0    0.08    0.05 
   1   9   0   -0.01    0.06 
  -1   9   0   -0.02    0.05 
   1  -9   0    0.08    0.07 
  -1  -9   0    0.02    0.07 
  -1   9  -1    0.35    0.08 
  -1   9  -1    0.29    0.06 
   1   9   1    0.20    0.07 
   1   9   1    0.33    0.07 
  -1  -9  -1    0.29    0.08 
   1  -9   1    0.34    0.08 
   1   9   2    0.76    0.09 
  -1   9  -2    0.79    0.10 
   1   9   2    0.75    0.10 
  -1   9  -2    0.96    0.09 
   1  -9   2    0.65    0.10 
  -1  -9  -2    0.89    0.10 
   1   9   3    1.22    0.13 
   1   9   3    1.04    0.11 
  -1   9  -3    1.29    0.12 
  -1   9  -3    1.22    0.13 
  -1  -9  -3    1.07    0.12 
   1  -9   3    1.34    0.14 
   1   9   4    2.20    0.14 
   1   9   4    2.01    0.14 
  -1   9  -4    1.83    0.14 
   1  -9   4    1.79    0.14 
  -1  -9  -4    2.00    0.14 
   1   9   5    7.01    0.26 
   1   9   5    7.97    0.26 
  -1   9  -5    7.71    0.26 
  -1  -9  -5    7.85    0.24 
   1  -9   5    7.79    0.27 
  -1   9  -6    9.97    0.31 
   1   9   6   10.88    0.31 
  -1  -9  -6   10.50    0.29 
  -1  -9  -6    9.86    0.32 
   1  -9   6   10.28    0.32 
  -1   9  -7    0.58    0.10 
   1   9   7    0.34    0.09 
   1  -9   7    0.63    0.11 
  -1  -9  -7    0.56    0.10 
   1   9   8    0.10    0.07 
  -1   9  -8    0.01    0.07 
   1  -9   8    0.09    0.07 
  -1  -9  -8    0.10    0.07 
   1   9   9    0.49    0.11 
  -1   9  -9    0.48    0.10 
  -1  -9  -9    0.47    0.10 
   1  -9   9    0.46    0.10 
   1   9  10    0.21    0.10 
  -1  -9 -10    0.32    0.10 
   1  -9  10    0.13    0.09 
   1  -9  11    0.63    0.12 
  -1  -9 -11    0.55    0.13 
  -1  -9 -12   -0.01    0.09 
  -1 -10  12   -0.11    0.08 
   1 -10 -12   -0.01    0.10 
   1 -10 -11    0.40    0.12 
  -1 -10  11    0.16    0.10 
  -1  10  10    0.08    0.09 
  -1 -10  10   -0.10    0.08 
  -1  10   9    0.06    0.08 
   1  10  -9    0.13    0.09 
   1 -10  -9    0.22    0.09 
  -1 -10   9    0.01    0.08 
  -1  10   8    0.47    0.10 
   1  10  -8    0.44    0.10 
  -1 -10   8    0.36    0.10 
   1 -10  -8    0.37    0.10 
  -1  10   7    0.47    0.09 
   1  10  -7    0.51    0.10 
  -1  10   7    0.61    0.10 
   1 -10  -7    0.44    0.09 
  -1 -10   7    0.43    0.10 
  -1  10   6    1.29    0.13 
   1  10  -6    1.12    0.13 
  -1  10   6    1.25    0.14 
  -1 -10   6    1.20    0.13 
   1 -10  -6    1.22    0.13 
   1  10  -5    5.67    0.22 
  -1  10   5    5.67    0.21 
   1  10  -5    6.06    0.23 
  -1  10   5    5.59    0.24 
  -1 -10   5    5.52    0.24 
   1 -10  -5    5.59    0.23 
  -1  10   4    0.77    0.11 
  -1  10   4    0.63    0.09 
   1  10  -4    0.66    0.09 
   1  10  -4    0.69    0.10 
  -1 -10   4    0.52    0.10 
   1 -10  -4    0.46    0.09 
   1  10  -3    5.39    0.20 
   1  10  -3    4.79    0.21 
  -1  10   3    5.05    0.22 
  -1 -10   3    5.28    0.22 
   1 -10  -3    5.50    0.22 
   1  10  -2    1.69    0.14 
  -1  10   2    1.73    0.15 
   1  10  -2    1.74    0.13 
   1 -10  -2    1.73    0.15 
  -1 -10   2    1.91    0.15 
  -1  10   1    2.29    0.16 
   1  10  -1    2.52    0.14 
   1  10  -1    2.46    0.16 
   1 -10  -1    2.93    0.17 
  -1 -10   1    2.63    0.17 
   1  10   0    1.65    0.12 
   1  10   0    1.64    0.14 
  -1  10   0    1.93    0.14 
   1 -10   0    1.42    0.14 
  -1 -10   0    1.84    0.15 
   1  10   1    1.78    0.12 
   1  10   1    1.33    0.13 
  -1  10  -1    1.81    0.15 
  -1 -10  -1    1.45    0.14 
   1 -10   1    1.56    0.14 
   1  10   2   -0.02    0.05 
   1  10   2    0.03    0.07 
  -1  10  -2    0.00    0.06 
   1 -10   2   -0.01    0.07 
  -1 -10  -2   -0.01    0.07 
   1  10   3    0.19    0.07 
  -1  10  -3    0.31    0.08 
   1  10   3    0.25    0.08 
  -1 -10  -3    0.18    0.08 
   1 -10   3    0.32    0.09 
   1  10   4    0.99    0.12 
   1  10   4    0.85    0.10 
  -1  10  -4    0.61    0.10 
  -1 -10  -4    0.62    0.10 
   1 -10   4    0.68    0.11 
  -1  10  -5    0.37    0.09 
   1  10   5    0.11    0.08 
   1  10   5    0.25    0.08 
  -1 -10  -5    0.33    0.08 
   1 -10   5    0.13    0.08 
  -1  10  -6    3.30    0.19 
   1  10   6    2.73    0.17 
  -1 -10  -6    2.29    0.18 
   1 -10   6    2.82    0.19 
   1  10   7   -0.07    0.06 
  -1  10  -7    0.02    0.07 
   1 -10   7   -0.06    0.07 
  -1 -10  -7    0.08    0.08 
  -1  10  -8   -0.15    0.07 
   1  10   8   -0.02    0.07 
   1 -10   8    0.06    0.08 
  -1 -10  -8   -0.08    0.07 
   1  10   9    0.54    0.11 
  -1  10  -9    0.70    0.12 
  -1 -10  -9    0.63    0.12 
   1 -10   9    0.61    0.12 
   1  10  10    1.99    0.19 
   1 -10  10    1.97    0.18 
  -1 -10 -10    1.89    0.19 
   1  10  11    0.36    0.12 
   1 -10  11    0.33    0.11 
  -1 -10 -12    0.42    0.12 
  -1 -11  11    0.36    0.12 
  -1 -11  10    0.01    0.10 
   1  11  -9    0.10    0.09 
  -1 -11   9    0.00    0.09 
   1 -11  -9    0.04    0.09 
   1  11  -8    0.34    0.10 
   1 -11  -8    0.40    0.10 
  -1 -11   8    0.31    0.10 
   1  11  -7    0.30    0.09 
  -1  11   7    0.28    0.09 
  -1 -11   7    0.39    0.10 
   1  11  -6    0.17    0.08 
  -1  11   6    0.18    0.09 
   1 -11  -6    0.59    0.10 
  -1 -11   6    0.36    0.10 
  -1  11   5    0.21    0.09 
   1  11  -5    0.15    0.08 
  -1 -11   5    0.19    0.09 
   1 -11  -5    0.13    0.08 
   1  11  -4    0.06    0.07 
  -1  11   4    0.04    0.08 
  -1 -11   4   -0.02    0.08 
   1 -11  -4    0.08    0.08 
   1  11  -3    3.39    0.19 
  -1  11   3    3.48    0.20 
   1 -11  -3    3.37    0.19 
  -1 -11   3    3.40    0.20 
  -1  11   2    2.43    0.18 
   1  11  -2    2.19    0.16 
   1 -11  -2    2.18    0.16 
  -1 -11   2    2.61    0.18 
   1  11  -1    0.57    0.10 
  -1  11   1    0.67    0.11 
  -1 -11   1    0.55    0.10 
   1 -11  -1    0.51    0.10 
   1  11   0    1.26    0.14 
  -1  11   0    1.63    0.16 
  -1 -11   0    1.47    0.14 
   1 -11   0    1.18    0.13 
  -1  11  -1   -0.10    0.06 
   1  11   1   -0.05    0.05 
   1  11   1    0.15    0.08 
   1 -11   1    0.09    0.08 
  -1 -11  -1   -0.09    0.07 
  -1  11  -2    0.09    0.07 
   1  11   2   -0.02    0.07 
   1  11   2    0.02    0.06 
  -1 -11  -2    0.02    0.07 
   1 -11   2    0.14    0.08 
   1  11   3    0.12    0.08 
  -1  11  -3    0.04    0.07 
   1  11   3    0.09    0.06 
  -1 -11  -3    0.19    0.08 
   1 -11   3   -0.05    0.07 
   1  11   4    0.11    0.08 
   1  11   4    0.11    0.07 
  -1  11  -4    0.22    0.09 
  -1 -11  -4    0.20    0.08 
   1 -11   4    0.08    0.08 
   1  11   5    0.81    0.11 
  -1  11  -5    0.94    0.13 
   1  11   5    0.96    0.13 
   1 -11   5    0.71    0.12 
  -1 -11  -5    0.87    0.12 
   1  11   6   -0.03    0.07 
  -1  11  -6    0.08    0.08 
   1 -11   6   -0.01    0.08 
  -1 -11  -6   -0.09    0.07 
   1  11   7    1.03    0.13 
  -1  11  -7    1.04    0.14 
  -1 -11  -7    1.08    0.14 
   1 -11   7    1.01    0.14 
  -1  11  -8   -0.16    0.07 
   1  11   8   -0.06    0.08 
  -1 -11  -8    0.13    0.09 
   1 -11   8    0.08    0.08 
  -1  11  -9    0.29    0.10 
   1  11   9    0.22    0.10 
  -1 -11  -9    0.38    0.11 
   1 -11   9    0.31    0.11 
   1  11  10    0.31    0.11 
   1 -11  10    0.28    0.11 
   1  11  11    0.09    0.10 
   1 -11  11    0.05    0.10 
  -1 -12   9    0.04    0.10 
   1 -12  -9   -0.10    0.09 
   1  12  -8    0.07    0.09 
   1 -12  -8    0.00    0.09 
  -1 -12   8   -0.04    0.10 
  -1  12   7    0.08    0.09 
   1  12  -7   -0.11    0.08 
  -1 -12   7   -0.14    0.08 
   1  12  -6    1.14    0.15 
  -1  12   6    0.97    0.14 
  -1 -12   6    0.73    0.13 
   1 -12  -6    0.99    0.13 
  -1  12   5   -0.04    0.07 
   1  12  -5   -0.12    0.07 
   1 -12  -5    0.01    0.09 
  -1 -12   5   -0.06    0.07 
  -1  12   4   -0.08    0.07 
   1  12  -4   -0.07    0.07 
  -1 -12   4   -0.01    0.08 
   1 -12  -4   -0.10    0.08 
   1  12  -3   -0.10    0.07 
  -1  12   3    0.00    0.07 
   1 -12  -3   -0.18    0.07 
  -1 -12   3    0.02    0.08 
   1  12  -2    0.85    0.13 
  -1  12   2    1.11    0.14 
  -1 -12   2    0.86    0.13 
   1 -12  -2    0.72    0.12 
   1  12  -1    0.07    0.08 
  -1  12   1    0.03    0.08 
   1 -12  -1   -0.01    0.08 
  -1 -12   1    0.04    0.08 
   1  12   0    0.14    0.09 
  -1  12   0   -0.02    0.08 
   1 -12   0   -0.08    0.08 
  -1 -12   0    0.01    0.08 
   1  12   1   -0.02    0.07 
  -1  12  -1   -0.07    0.07 
   1 -12   1    0.17    0.09 
  -1 -12  -1   -0.05    0.07 
   1  12   2    0.56    0.12 
  -1  12  -2    0.78    0.12 
   1 -12   2    0.83    0.13 
  -1 -12  -2    0.59    0.11 
  -1  12  -3    0.51    0.11 
   1  12   3    0.36    0.11 
  -1 -12  -3    0.42    0.10 
   1 -12   3    0.27    0.10 
   1  12   4    0.14    0.09 
  -1  12  -4    0.05    0.08 
  -1 -12  -4    0.10    0.09 
   1 -12   4    0.08    0.10 
  -1  12  -5    0.03    0.08 
   1  12   5   -0.05    0.08 
   1 -12   5   -0.09    0.09 
  -1 -12  -5    0.06    0.08 
  -1  12  -6    0.04    0.09 
  -1 -12  -6    0.11    0.09 
   1 -12   6    0.03    0.09 
  -1  12  -7    0.22    0.10 
  -1 -12  -7    0.16    0.10 
   1 -12   7   -0.06    0.09 
  -1  12  -8    3.49    0.23 
  -1 -12  -8    3.79    0.24 
   1 -12   8    3.82    0.24 
  -1  12  -9    0.70    0.14 
   1 -12   9    0.24    0.11 
  -1 -12  -9    0.62    0.14 
   1  13  -8    0.06    0.11 
   1 -13  -8    0.07    0.10 
  -1  13   7    0.31    0.12 
   1  13  -7    0.25    0.11 
  -1 -13   7    0.35    0.13 
   1  13  -6    0.12    0.10 
  -1  13   6    0.14    0.10 
  -1 -13   6    0.01    0.10 
   1  13  -5    0.43    0.12 
  -1  13   5    0.39    0.11 
  -1 -13   5    0.48    0.12 
   1 -13  -5    0.24    0.11 
   1  13  -4   -0.06    0.08 
  -1  13   4    0.23    0.10 
  -1 -13   4    0.11    0.11 
   1 -13  -4    0.17    0.09 
   1  13  -3    0.15    0.10 
  -1  13   3    0.17    0.10 
   1 -13  -3   -0.02    0.09 
  -1 -13   3   -0.08    0.09 
  -1  13   2    0.32    0.10 
   1  13  -2    0.11    0.09 
   1 -13  -2    0.22    0.11 
  -1 -13   2    0.16    0.09 
   1  13  -1   -0.05    0.08 
  -1  13   1   -0.03    0.08 
  -1 -13   1    0.03    0.09 
   1 -13  -1   -0.04    0.08 
  -1  13   0    0.04    0.09 
   1  13   0   -0.13    0.08 
  -1 -13   0    0.02    0.09 
   1 -13   0    0.05    0.09 
  -1  13  -1    0.21    0.09 
   1  13   1   -0.06    0.08 
   1 -13   1    0.17    0.10 
  -1 -13  -1    0.25    0.10 
   1  13   2   -0.02    0.09 
  -1  13  -2    0.09    0.09 
   1 -13   2    0.11    0.09 
  -1 -13  -2   -0.04    0.09 
  -1  13  -3    0.59    0.13 
   1  13   3    0.70    0.13 
  -1 -13  -3    0.46    0.11 
   1 -13   3    0.35    0.11 
   1  13   4    0.03    0.09 
  -1  13  -4    0.07    0.10 
   1 -13   4    0.27    0.11 
  -1 -13  -4    0.14    0.10 
  -1  13  -5    3.75    0.24 
   1  13   5    3.72    0.23 
   1 -13   5    3.20    0.24 
  -1  13  -6    0.38    0.11 
   1 -13   6    0.41    0.13 
  -1 -13  -6    0.60    0.13 
  -1  13  -7    0.22    0.12 
  -1 -13  -7    0.45    0.13 
  -1  13  -8    0.25    0.11 
   1  14  -5   -0.04    0.11 
   1 -14  -5   -0.10    0.09 
   1  14  -4    0.92    0.15 
  -1  14   4    0.99    0.16 
   1 -14  -4    0.81    0.14 
  -1  14   3    0.03    0.10 
   1  14  -3   -0.15    0.08 
  -1 -14   3    0.01    0.10 
   1 -14  -3   -0.05    0.10 
  -1  14   2    0.11    0.11 
   1  14  -2    0.01    0.10 
  -1 -14   2   -0.07    0.10 
   1 -14  -2   -0.17    0.09 
   1  14  -1   -0.03    0.10 
  -1  14   1    0.08    0.11 
   1 -14  -1   -0.10    0.09 
  -1 -14   1   -0.14    0.10 
   1  14   0    0.16    0.10 
  -1  14   0    0.44    0.12 
  -1 -14   0    0.65    0.13 
   1 -14   0    0.54    0.12 
  -1  14  -1    0.36    0.12 
   1  14   1    0.26    0.11 
   1 -14   1    0.27    0.12 
  -1 -14  -1    0.27    0.11 
  -1  14  -2    0.01    0.09 
   1  14   2   -0.20    0.08 
   1 -14   2    0.00    0.11 
  -1 -14  -2    0.20    0.11 
   1  14   3    0.60    0.13 
  -1  14  -3    0.33    0.12 
  -1 -14  -3    0.42    0.12 
   1 -14   3    0.39    0.13 
  -1 -14  -4   -0.05    0.10 
   2   0 -16    1.19    0.17 
  -2   0  16    0.71    0.13 
  -2   0  15    0.05    0.07 
   2   0 -15    0.01    0.10 
   2   0 -14    0.21    0.10 
  -2   0  14    0.11    0.08 
   2   0 -13   -0.04    0.09 
  -2   0  13    0.02    0.06 
   2   0 -12    0.11    0.08 
  -2   0  12    0.09    0.07 
   2   0 -11    0.00    0.07 
  -2   0  11    0.03    0.06 
  -2   0  10    7.57    0.20 
   2   0 -10    7.45    0.25 
  -2   0  10    7.46    0.25 
  -2   0   9    0.04    0.03 
   2   0  -9    0.01    0.06 
  -2   0   9    0.03    0.05 
  -2   0   8    8.65    0.21 
   2   0  -8    8.96    0.19 
  -2   0   8    8.32    0.24 
   2   0  -8    9.03    0.25 
   2   0  -7   -0.04    0.02 
  -2   0   7   -0.01    0.03 
  -2   0   7   -0.02    0.02 
   2   0  -7    0.00    0.04 
  -2   0   6    0.51    0.05 
   2   0  -6    0.64    0.04 
   2   0  -6    0.56    0.07 
  -2   0   6    0.67    0.07 
  -2   0   5   -0.02    0.03 
  -2   0   5   -0.01    0.02 
   2   0  -5    0.02    0.02 
   2   0  -5    0.05    0.04 
  -2   0   4    0.26    0.03 
   2   0  -4    0.22    0.02 
   2   0  -4    0.22    0.04 
  -2   0   4    0.19    0.04 
  -2   0   3    0.01    0.02 
  -2   0   3    0.00    0.02 
   2   0  -3    0.00    0.03 
   2   0  -2  149.96    2.48 
  -2   0   2  149.92    2.43 
  -2   0   2  150.46    2.54 
   2   0  -1   -0.01    0.01 
  -2   0   1   -0.01    0.01 
  -2   0   1   -0.01    0.01 
   2   0  -1   -0.03    0.01 
   2   0   0   14.36    0.26 
   2   0   0   14.04    0.24 
  -2   0   0   14.11    0.24 
  -2   0   0   14.37    0.25 
   2   0   1   -1.03    0.03 
  -2   0  -1   -1.05    0.02 
  -2   0  -1   -1.08    0.02 
   2   0   2   33.24    0.57 
   2   0   2   32.84    0.53 
   2   0   2   33.22    0.58 
  -2   0  -2   33.79    0.57 
   2   0   3    0.05    0.01 
   2   0   3    0.04    0.03 
   2   0   3    0.06    0.03 
  -2   0  -3    0.07    0.03 
  -2   0  -4   43.25    0.74 
  -2   0  -4   42.79    0.74 
   2   0   4   42.33    0.68 
   2   0   4   41.78    0.76 
   2   0   5    0.04    0.02 
  -2   0  -5    0.05    0.03 
   2   0   5    0.01    0.03 
  -2   0  -5    0.04    0.04 
  -2   0  -6   19.06    0.38 
  -2   0  -6   19.91    0.41 
   2   0   6   19.64    0.42 
   2   0   6   19.61    0.34 
  -2   0  -7    0.02    0.05 
   2   0   7    0.00    0.02 
  -2   0  -7    0.00    0.04 
   2   0   7   -0.03    0.04 
  -2   0  -8    0.03    0.06 
   2   0   8    0.02    0.04 
  -2   0  -8    0.07    0.05 
  -2   0  -9   -0.10    0.04 
  -2   0  -9    0.07    0.07 
   2   0   9    0.05    0.05 
   2   0  10    8.17    0.27 
  -2   0 -10    8.48    0.24 
  -2   0 -10    9.01    0.29 
   2   0  11    0.01    0.06 
  -2   0 -11    0.11    0.08 
   2   0  12    0.07    0.06 
  -2   0 -12    0.02    0.08 
  -2   0 -13   -0.04    0.09 
   2   0  13    0.03    0.07 
  -2   0 -14    5.93    0.29 
   2   0  14    5.49    0.27 
   2   0  15   -0.05    0.07 
  -2   0 -15    0.03    0.11 
   2   1 -16    0.21    0.13 
  -2   1  16    0.19    0.10 
  -2  -1  16    0.23    0.10 
   2  -1 -16    0.14    0.12 
   2   1 -15    0.17    0.12 
  -2   1  15    0.25    0.09 
  -2  -1  15    0.22    0.09 
   2  -1 -15    0.07    0.10 
   2   1 -14    1.08    0.15 
  -2   1  14    1.12    0.14 
   2  -1 -14    0.93    0.14 
  -2  -1  14    1.00    0.13 
  -2   1  13    0.57    0.11 
   2   1 -13    0.60    0.12 
   2  -1 -13    0.54    0.11 
  -2  -1  13    0.49    0.10 
  -2   1  12    1.53    0.14 
   2   1 -12    1.50    0.16 
  -2  -1  12    1.40    0.13 
   2  -1 -12    1.67    0.16 
  -2   1  11   25.24    0.57 
   2   1 -11   24.30    0.56 
  -2  -1  11   24.50    0.56 
   2  -1 -11   23.92    0.55 
  -2  -1  11   24.86    0.49 
  -2   1  10    7.02    0.19 
  -2   1  10    6.61    0.24 
   2   1 -10    6.75    0.24 
   2  -1 -10    6.53    0.24 
  -2  -1  10    6.77    0.23 
  -2  -1  10    7.10    0.20 
  -2   1   9    1.17    0.10 
  -2   1   9    1.37    0.08 
   2   1  -9    1.16    0.13 
   2  -1  -9    1.39    0.12 
   2  -1  -9    1.28    0.08 
  -2  -1   9    1.24    0.09 
  -2  -1   9    1.17    0.10 
   2   1  -8    0.76    0.06 
  -2   1   8    0.49    0.07 
   2   1  -8    0.51    0.08 
  -2   1   8    0.61    0.06 
  -2  -1   8    0.64    0.06 
   2  -1  -8    0.64    0.06 
   2  -1  -8    0.48    0.08 
  -2  -1   8    0.60    0.07 
  -2   1   7    2.75    0.13 
   2   1  -7    2.93    0.09 
   2   1  -7    2.96    0.13 
  -2   1   7    2.89    0.10 
  -2  -1   7    2.83    0.10 
   2  -1  -7    2.90    0.13 
  -2  -1   7    2.70    0.12 
   2  -1  -7    2.91    0.09 
   2   1  -6    5.60    0.17 
  -2   1   6    5.67    0.14 
  -2   1   6    5.37    0.17 
   2   1  -6    5.91    0.13 
   2  -1  -6    5.82    0.13 
   2  -1  -6    5.64    0.17 
  -2  -1   6    5.77    0.17 
  -2  -1   6    5.61    0.15 
  -2   1   5    1.21    0.06 
   2   1  -5    1.17    0.05 
  -2   1   5    1.10    0.07 
   2  -1  -5    1.07    0.08 
  -2  -1   5    1.11    0.07 
   2  -1  -5    1.20    0.05 
  -2  -1   5    1.10    0.07 
  -2   1   4    2.42    0.08 
   2   1  -4    2.39    0.06 
  -2   1   4    2.34    0.09 
   2   1  -4    2.33    0.10 
   2  -1  -4    2.43    0.06 
  -2  -1   4    2.36    0.09 
   2  -1  -4    2.60    0.09 
  -2  -1   4    2.41    0.08 
   2   1  -3    2.47    0.06 
  -2   1   3    2.58    0.06 
  -2   1   3    2.43    0.07 
  -2   1   3    2.52    0.09 
   2   1  -3    2.38    0.09 
  -2  -1   3    2.43    0.08 
  -2  -1   3    2.41    0.08 
   2  -1  -3    2.38    0.08 
  -2   1   2    0.07    0.02 
  -2   1   2    0.04    0.01 
   2   1  -2    0.05    0.01 
   2   1  -2    0.02    0.02 
  -2   1   2    0.05    0.02 
  -2  -1   2    0.02    0.02 
   2  -1  -2    0.04    0.02 
  -2  -1   2    0.04    0.02 
   2   1  -1   25.31    0.42 
  -2   1   1   25.43    0.42 
   2   1  -1   25.42    0.42 
  -2   1   1   25.08    0.42 
  -2  -1   1   25.70    0.42 
   2  -1  -1   25.21    0.44 
   2  -1  -1   24.58    0.41 
   2   1   0    0.01    0.01 
   2   1   0    0.02    0.01 
  -2   1   0    0.03    0.02 
  -2   1   0    0.03    0.02 
   2  -1   0    0.05    0.02 
  -2  -1   0    0.01    0.01 
  -2  -1   0    0.02    0.01 
  -2   1  -1   17.03    0.28 
   2   1   1   16.45    0.30 
   2   1   1   16.85    0.30 
  -2   1  -1   16.97    0.28 
   2  -1   1   16.17    0.30 
  -2  -1  -1   16.65    0.30 
  -2  -1  -1   16.51    0.27 
   2   1   2    0.56    0.05 
   2   1   2    0.56    0.05 
  -2   1  -2    0.52    0.05 
  -2   1  -2    0.50    0.05 
   2  -1   2    0.56    0.04 
   2  -1   2    0.58    0.05 
  -2  -1  -2    0.55    0.05 
  -2   1  -3   36.36    0.62 
   2   1   3   35.46    0.64 
   2   1   3   35.15    0.62 
  -2   1  -3   36.40    0.62 
  -2  -1  -3   35.51    0.62 
   2  -1   3   36.79    0.59 
   2  -1   3   35.47    0.64 
  -2   1  -4    7.28    0.17 
   2   1   4    6.74    0.18 
   2   1   4    7.12    0.18 
  -2   1  -4    6.98    0.17 
   2  -1   4    6.84    0.18 
  -2  -1  -4    6.91    0.17 
   2  -1   4    7.03    0.14 
  -2   1  -5    0.95    0.07 
   2   1   5    0.97    0.04 
   2   1   5    0.85    0.07 
   2   1   5    0.84    0.07 
  -2   1  -5    0.89    0.08 
   2  -1   5    0.92    0.07 
   2  -1   5    0.95    0.05 
  -2  -1  -5    0.93    0.07 
  -2   1  -6    2.80    0.12 
   2   1   6    2.69    0.12 
   2   1   6    2.77    0.07 
  -2   1  -6    2.81    0.11 
   2  -1   6    2.86    0.12 
  -2  -1  -6    2.60    0.11 
  -2  -1  -6    2.72    0.12 
   2  -1   6    2.85    0.09 
  -2   1  -7    0.35    0.06 
  -2   1  -7    0.29    0.06 
   2   1   7    0.27    0.06 
   2   1   7    0.31    0.03 
   2  -1   7    0.31    0.04 
   2  -1   7    0.24    0.05 
  -2  -1  -7    0.22    0.06 
  -2  -1  -7    0.28    0.05 
  -2   1  -8    7.97    0.22 
  -2   1  -8    8.13    0.25 
   2   1   8    7.89    0.24 
  -2  -1  -8    7.85    0.22 
   2  -1   8    8.06    0.18 
  -2  -1  -8    7.95    0.24 
   2  -1   8    8.17    0.25 
  -2   1  -9    3.52    0.15 
  -2   1  -9    3.47    0.18 
   2   1   9    3.29    0.16 
  -2  -1  -9    3.54    0.18 
   2  -1   9    3.36    0.16 
  -2  -1  -9    3.36    0.15 
   2   1  10    0.02    0.06 
  -2   1 -10    0.13    0.08 
  -2   1 -10    0.02    0.05 
   2  -1  10    0.09    0.06 
  -2  -1 -10    0.08    0.07 
  -2  -1 -10    0.10    0.06 
   2   1  11    0.75    0.11 
  -2   1 -11    0.64    0.11 
  -2  -1 -11    0.64    0.11 
   2  -1  11    0.61    0.10 
   2   1  12    0.76    0.11 
  -2   1 -12    0.62    0.12 
  -2  -1 -12    0.59    0.11 
   2  -1  12    0.63    0.11 
  -2   1 -13    0.16    0.10 
   2   1  13    0.18    0.08 
  -2  -1 -13    0.17    0.10 
   2  -1  13    0.02    0.07 
   2   1  14   -0.01    0.07 
  -2   1 -14    0.08    0.10 
   2  -1  14   -0.05    0.06 
  -2  -1 -14   -0.04    0.10 
   2   1  15    1.65    0.18 
  -2   1 -15    1.75    0.19 
   2  -1  15    1.87    0.18 
  -2  -1 -15    1.48    0.18 
   2   2 -16   -0.07    0.11 
  -2   2  16    0.00    0.08 
  -2  -2  16    0.08    0.09 
   2  -2 -16   -0.02    0.10 
  -2   2  15    0.41    0.11 
   2   2 -15    0.40    0.13 
  -2  -2  15    0.45    0.11 
   2  -2 -15    0.32    0.12 
   2   2 -14    0.05    0.10 
  -2   2  14    0.09    0.08 
  -2  -2  14    0.00    0.07 
   2  -2 -14    0.01    0.09 
   2   2 -13    0.81    0.13 
  -2   2  13    0.98    0.13 
   2  -2 -13    1.01    0.13 
  -2  -2  13    0.88    0.12 
  -2   2  12    0.08    0.07 
   2   2 -12    0.28    0.10 
  -2  -2  12    0.13    0.07 
   2  -2 -12    0.08    0.08 
  -2   2  11    0.23    0.08 
   2   2 -11    0.47    0.10 
  -2  -2  11    0.36    0.06 
  -2  -2  11    0.46    0.08 
   2  -2 -11    0.32    0.09 
  -2   2  10    0.87    0.10 
   2   2 -10    0.65    0.11 
  -2   2  10    0.74    0.07 
  -2  -2  10    0.75    0.09 
   2  -2 -10    0.86    0.11 
  -2  -2  10    0.89    0.08 
  -2   2   9    6.07    0.17 
   2   2  -9    6.09    0.22 
  -2   2   9    6.01    0.21 
   2  -2  -9    5.98    0.16 
   2  -2  -9    5.73    0.21 
  -2  -2   9    6.20    0.21 
  -2  -2   9    5.96    0.18 
   2   2  -8    2.20    0.09 
  -2   2   8    2.03    0.09 
   2   2  -8    2.06    0.13 
  -2   2   8    1.96    0.12 
   2  -2  -8    2.01    0.08 
  -2  -2   8    2.01    0.11 
   2  -2  -8    2.03    0.13 
  -2  -2   8    2.06    0.10 
   2   2  -7    1.47    0.11 
  -2   2   7    1.27    0.09 
   2   2  -7    1.60    0.07 
  -2   2   7    1.39    0.07 
  -2  -2   7    1.43    0.08 
   2  -2  -7    1.28    0.10 
   2  -2  -7    1.40    0.07 
  -2  -2   7    1.53    0.09 
   2   2  -6    0.07    0.03 
  -2   2   6    0.04    0.03 
   2   2  -6    0.03    0.05 
  -2   2   6    0.06    0.04 
  -2  -2   6    0.04    0.03 
  -2  -2   6    0.05    0.03 
   2  -2  -6    0.06    0.03 
   2  -2  -6    0.07    0.04 
   2   2  -5    1.40    0.09 
  -2   2   5    1.44    0.08 
  -2   2   5    1.45    0.07 
   2   2  -5    1.50    0.06 
   2  -2  -5    1.40    0.06 
  -2  -2   5    1.47    0.07 
   2  -2  -5    1.36    0.08 
  -2  -2   5    1.36    0.07 
   2   2  -4    0.58    0.04 
  -2   2   4    0.65    0.05 
  -2   2   4    0.65    0.04 
   2   2  -4    0.66    0.07 
  -2   2   4    0.53    0.06 
  -2  -2   4    0.54    0.05 
   2  -2  -4    0.73    0.07 
  -2  -2   4    0.55    0.05 
  -2   2   3   30.77    0.53 
  -2   2   3   29.76    0.55 
  -2   2   3   30.99    0.53 
   2   2  -3   30.57    0.55 
   2   2  -3   31.66    0.52 
  -2  -2   3   31.01    0.54 
   2  -2  -3   31.33    0.53 
  -2  -2   3   30.32    0.53 
  -2   2   2   33.19    0.56 
  -2   2   2   33.22    0.56 
   2   2  -2   33.51    0.58 
  -2   2   2   32.85    0.58 
  -2   2   2   33.54    0.56 
   2   2  -2   33.64    0.56 
  -2  -2   2   33.67    0.56 
  -2  -2   2   33.03    0.56 
   2   2  -1    1.70    0.06 
  -2   2   1    1.72    0.05 
  -2   2   1    1.72    0.06 
  -2   2   1    1.59    0.06 
  -2  -2   1    1.72    0.06 
   2  -2  -1    1.63    0.06 
  -2   2   0    1.43    0.03 
  -2   2   0    1.39    0.06 
   2   2   0    1.33    0.06 
  -2   2   0    1.44    0.06 
   2   2   0    1.40    0.04 
  -2  -2   0    1.46    0.05 
   2  -2   0    1.45    0.06 
  -2   2  -1   29.10    0.52 
   2   2   1   29.21    0.51 
   2   2   1   29.14    0.50 
  -2   2  -1   29.86    0.49 
  -2  -2  -1   29.33    0.49 
   2  -2   1   29.84    0.50 
   2  -2   1   29.94    0.52 
   2   2   2   16.89    0.32 
   2   2   2   16.76    0.32 
  -2   2  -2   16.68    0.32 
  -2   2  -2   16.96    0.30 
   2  -2   2   17.11    0.31 
  -2  -2  -2   16.80    0.32 
  -2  -2  -2   16.86    0.29 
   2  -2   2   17.49    0.33 
  -2   2  -3    5.36    0.14 
   2   2   3    5.39    0.14 
   2   2   3    5.11    0.14 
  -2   2  -3    5.47    0.13 
  -2  -2  -3    5.17    0.14 
   2  -2   3    5.44    0.13 
  -2  -2  -3    5.41    0.11 
   2  -2   3    5.35    0.14 
   2   2   4    0.57    0.06 
   2   2   4    0.68    0.06 
   2   2   4    0.71    0.03 
  -2   2  -4    0.74    0.06 
  -2   2  -4    0.75    0.06 
   2  -2   4    0.66    0.05 
  -2  -2  -4    0.80    0.06 
   2  -2   4    0.72    0.06 
  -2   2  -5   25.15    0.47 
   2   2   5   24.48    0.48 
   2   2   5   24.44    0.49 
   2   2   5   25.28    0.41 
  -2   2  -5   24.89    0.47 
  -2  -2  -5   24.63    0.47 
   2  -2   5   25.30    0.49 
   2  -2   5   24.59    0.44 
  -2   2  -6    3.06    0.13 
   2   2   6    2.98    0.13 
   2   2   6    3.10    0.08 
  -2   2  -6    2.94    0.12 
   2   2   6    2.90    0.12 
  -2  -2  -6    2.99    0.12 
   2  -2   6    3.05    0.12 
   2  -2   6    3.16    0.10 
   2   2   7    5.50    0.19 
   2   2   7    6.00    0.19 
   2   2   7    5.98    0.13 
  -2   2  -7    5.99    0.18 
  -2   2  -7    5.83    0.19 
   2  -2   7    5.63    0.15 
  -2  -2  -7    5.71    0.18 
   2  -2   7    5.95    0.19 
  -2  -2  -7    5.49    0.19 
  -2   2  -8    0.01    0.05 
   2   2   8   -0.06    0.04 
  -2   2  -8    0.05    0.06 
  -2  -2  -8    0.11    0.06 
   2  -2   8    0.06    0.03 
   2  -2   8    0.04    0.05 
  -2  -2  -8   -0.05    0.05 
  -2   2  -9    0.14    0.07 
   2   2   9    0.24    0.07 
  -2   2  -9    0.22    0.06 
  -2  -2  -9    0.17    0.06 
  -2  -2  -9    0.23    0.08 
   2  -2   9    0.12    0.06 
   2   2  10    0.09    0.06 
  -2   2 -10    0.06    0.08 
  -2   2 -10    0.03    0.06 
  -2  -2 -10    0.03    0.06 
  -2  -2 -10    0.10    0.08 
   2  -2  10    0.06    0.06 
  -2   2 -11   -0.09    0.07 
   2   2  11    0.01    0.06 
   2  -2  11   -0.01    0.05 
  -2  -2 -11   -0.01    0.08 
  -2   2 -12    1.53    0.17 
   2   2  12    1.28    0.15 
  -2  -2 -12    1.51    0.16 
   2  -2  12    1.27    0.14 
  -2   2 -13    0.51    0.12 
   2   2  13    0.64    0.11 
   2  -2  13    0.55    0.11 
  -2  -2 -13    0.66    0.13 
   2   2  14    1.26    0.15 
  -2   2 -14    1.25    0.16 
   2  -2  14    1.30    0.15 
  -2  -2 -14    1.05    0.15 
   2   2  15    0.54    0.13 
  -2   2 -15    0.48    0.14 
  -2  -2 -15    0.57    0.14 
   2  -2  15    0.51    0.12 
  -2   3  16   -0.09    0.08 
   2   3 -16   -0.05    0.12 
  -2  -3  16   -0.04    0.07 
   2  -3 -16    0.11    0.11 
  -2   3  15    0.14    0.09 
   2   3 -15   -0.01    0.11 
  -2  -3  15    0.20    0.09 
   2  -3 -15    0.24    0.11 
   2   3 -14    2.33    0.21 
  -2   3  14    2.17    0.18 
   2  -3 -14    2.46    0.20 
  -2  -3  14    2.10    0.17 
   2   3 -13    6.46    0.28 
  -2   3  13    6.08    0.26 
  -2  -3  13    5.96    0.25 
   2  -3 -13    5.81    0.27 
  -2   3  12    0.33    0.09 
   2   3 -12    0.45    0.11 
   2  -3 -12    0.42    0.10 
  -2  -3  12    0.50    0.09 
   2   3 -11    0.15    0.09 
  -2   3  11    0.05    0.07 
  -2  -3  11    0.17    0.06 
  -2  -3  11    0.14    0.06 
   2  -3 -11    0.13    0.08 
  -2   3  10    0.17    0.07 
   2   3 -10    0.20    0.09 
  -2  -3  10    0.16    0.06 
  -2  -3  10    0.12    0.05 
   2  -3 -10    0.23    0.08 
  -2   3   9    0.97    0.10 
   2   3  -9    0.81    0.11 
  -2   3   9    0.96    0.08 
   2   3  -9    0.97    0.08 
  -2  -3   9    0.89    0.09 
  -2  -3   9    0.85    0.09 
   2  -3  -9    0.87    0.10 
   2  -3  -9    0.83    0.07 
   2   3  -8    1.37    0.12 
  -2   3   8    1.57    0.09 
   2   3  -8    1.64    0.08 
  -2   3   8    1.33    0.11 
  -2  -3   8    1.55    0.10 
   2  -3  -8    1.49    0.08 
   2  -3  -8    1.37    0.12 
  -2  -3   8    1.60    0.10 
   2   3  -7    9.51    0.21 
  -2   3   7    9.29    0.25 
  -2   3   7    9.69    0.22 
   2   3  -7    9.56    0.26 
   2  -3  -7    9.48    0.21 
   2  -3  -7    9.29    0.25 
  -2  -3   7    9.68    0.24 
  -2  -3   7    9.60    0.23 
   2   3  -6   71.26    1.16 
  -2   3   6   71.03    1.16 
  -2   3   6   68.33    1.22 
   2   3  -6   68.97    1.20 
   2  -3  -6   68.78    1.19 
  -2  -3   6   68.65    1.20 
  -2  -3   6   67.40    1.17 
   2  -3  -6   69.57    1.16 
   2   3  -5   30.86    0.59 
  -2   3   5   31.85    0.56 
  -2   3   5   30.94    0.59 
   2   3  -5   31.50    0.55 
  -2   3   5   31.71    0.56 
  -2  -3   5   31.14    0.57 
  -2  -3   5   31.73    0.57 
   2  -3  -5   31.71    0.58 
   2   3  -4    0.31    0.05 
  -2   3   4    0.42    0.05 
  -2   3   4    0.44    0.05 
   2   3  -4    0.40    0.04 
  -2   3   4    0.37    0.04 
  -2   3   4    0.38    0.04 
  -2  -3   4    0.30    0.04 
  -2  -3   4    0.40    0.04 
  -2   3   3    4.55    0.13 
  -2   3   3    4.64    0.12 
  -2   3   3    4.74    0.12 
   2   3  -3    4.52    0.14 
   2   3  -3    4.70    0.12 
  -2   3   3    4.44    0.13 
  -2  -3   3    4.63    0.11 
  -2   3   2    1.50    0.06 
   2   3  -2    1.48    0.07 
  -2   3   2    1.45    0.07 
  -2   3   2    1.49    0.07 
   2  -3  -2    1.56    0.07 
  -2  -3   2    1.52    0.07 
  -2  -3   2    1.57    0.04 
  -2   3   1    9.39    0.18 
  -2   3   1    9.26    0.20 
  -2   3   1    9.38    0.20 
   2   3  -1    9.65    0.20 
   2   3  -1    9.47    0.20 
   2  -3  -1    9.32    0.20 
  -2  -3   1    9.40    0.20 
  -2   3   0  141.73    2.33 
   2   3   0  145.03    2.34 
  -2   3   0  142.84    2.33 
   2  -3   0  142.99    2.47 
  -2  -3   0  145.10    2.28 
  -2   3  -1   -0.05    0.03 
   2   3   1   -0.02    0.02 
   2   3   1   -0.01    0.03 
   2   3   1    0.05    0.03 
  -2   3  -1    0.02    0.02 
   2  -3   1    0.01    0.03 
  -2  -3  -1    0.05    0.03 
   2  -3   1    0.04    0.03 
  -2   3  -2   10.91    0.21 
  -2   3  -2   10.46    0.23 
   2   3   2   10.08    0.23 
   2   3   2   10.56    0.21 
  -2  -3  -2   10.38    0.23 
   2  -3   2   10.92    0.23 
   2  -3   2   10.27    0.22 
  -2  -3  -2   10.67    0.20 
   2   3   3    4.15    0.12 
   2   3   3    4.00    0.13 
  -2   3  -3    3.99    0.11 
  -2   3  -3    3.94    0.13 
   2  -3   3    3.82    0.12 
   2  -3   3    3.91    0.12 
  -2  -3  -3    3.77    0.12 
  -2  -3  -3    3.97    0.10 
  -2   3  -4    0.41    0.05 
   2   3   4    0.44    0.05 
  -2   3  -4    0.44    0.05 
   2   3   4    0.40    0.05 
  -2  -3  -4    0.40    0.05 
  -2  -3  -4    0.51    0.04 
   2  -3   4    0.43    0.05 
   2  -3   4    0.41    0.05 
   2   3   5    1.53    0.09 
  -2   3  -5    1.83    0.09 
   2   3   5    1.49    0.09 
   2   3   5    1.71    0.06 
  -2   3  -5    1.60    0.09 
   2  -3   5    1.76    0.08 
  -2  -3  -5    1.73    0.09 
   2  -3   5    1.63    0.09 
  -2   3  -6    5.26    0.17 
   2   3   6    5.52    0.12 
   2   3   6    5.28    0.17 
  -2   3  -6    5.51    0.17 
   2   3   6    5.41    0.18 
   2  -3   6    5.32    0.15 
   2  -3   6    5.09    0.17 
  -2  -3  -6    5.18    0.16 
  -2   3  -7    8.10    0.22 
   2   3   7    8.29    0.24 
  -2   3  -7    8.96    0.24 
   2   3   7    8.53    0.24 
  -2  -3  -7    8.15    0.23 
   2  -3   7    8.66    0.21 
   2  -3   7    8.35    0.24 
   2   3   8    2.75    0.15 
   2   3   8    2.35    0.14 
  -2   3  -8    2.56    0.13 
  -2   3  -8    2.44    0.15 
   2  -3   8    2.59    0.11 
   2  -3   8    2.32    0.13 
  -2  -3  -8    2.16    0.12 
  -2   3  -9    5.95    0.20 
  -2   3  -9    5.87    0.22 
   2   3   9    5.42    0.21 
  -2  -3  -9    5.75    0.22 
  -2  -3  -9    5.71    0.20 
   2  -3   9    5.80    0.18 
   2  -3   9    5.65    0.21 
   2   3  10    0.52    0.09 
  -2   3 -10    0.57    0.08 
  -2   3 -10    0.46    0.10 
  -2  -3 -10    0.55    0.08 
   2  -3  10    0.42    0.08 
  -2  -3 -10    0.49    0.09 
   2   3  11    1.47    0.14 
  -2   3 -11    1.75    0.16 
  -2  -3 -11    0.90    0.13 
   2  -3  11    1.78    0.14 
  -2   3 -12    1.28    0.15 
   2   3  12    1.53    0.15 
  -2  -3 -12    1.36    0.15 
   2  -3  12    1.45    0.14 
   2   3  13    1.69    0.17 
  -2   3 -13    1.90    0.19 
   2  -3  13    1.83    0.17 
  -2  -3 -13    1.24    0.15 
  -2   3 -14    0.35    0.12 
   2   3  14    0.23    0.10 
  -2  -3 -14    0.27    0.11 
   2  -3  14    0.22    0.09 
   2   3  15    1.11    0.16 
  -2   3 -15    1.43    0.18 
  -2  -3 -15    1.42    0.18 
   2  -3  15    1.29    0.16 
   2   4 -16    0.03    0.13 
  -2  -4  16    0.15    0.09 
   2   4 -15    0.63    0.15 
  -2   4  15    0.59    0.12 
   2  -4 -15    0.76    0.14 
  -2  -4  15    1.02    0.14 
   2   4 -14    1.14    0.17 
  -2   4  14    1.09    0.15 
   2  -4 -14    1.01    0.15 
  -2  -4  14    1.31    0.15 
  -2   4  13    5.06    0.24 
   2   4 -13    5.25    0.27 
   2  -4 -13    4.96    0.25 
  -2  -4  13    5.51    0.24 
   2   4 -12    0.12    0.10 
  -2   4  12    0.05    0.07 
   2  -4 -12    0.05    0.08 
  -2  -4  12    0.06    0.06 
  -2  -4  12    0.09    0.06 
  -2   4  11    0.15    0.07 
   2   4 -11    0.21    0.09 
   2  -4 -11    0.17    0.08 
  -2  -4  11    0.23    0.06 
  -2  -4  11    0.11    0.06 
   2   4 -10    0.00    0.08 
  -2   4  10    0.06    0.06 
  -2  -4  10    0.04    0.05 
   2  -4 -10   -0.03    0.07 
  -2  -4  10   -0.08    0.04 
   2   4  -9    1.78    0.10 
   2   4  -9    1.47    0.15 
  -2   4   9    1.64    0.13 
  -2   4   9    1.88    0.10 
   2  -4  -9    1.78    0.10 
   2  -4  -9    1.86    0.15 
  -2  -4   9    1.69    0.11 
  -2  -4   9    1.67    0.11 
  -2   4   8    0.13    0.04 
   2   4  -8    0.02    0.07 
  -2   4   8    0.08    0.05 
   2   4  -8    0.11    0.04 
  -2  -4   8    0.04    0.05 
  -2  -4   8    0.05    0.04 
   2  -4  -8    0.12    0.04 
   2  -4  -8    0.12    0.06 
   2   4  -7    0.11    0.04 
  -2   4   7    0.19    0.04 
   2   4  -7    0.09    0.06 
  -2   4   7    0.07    0.05 
   2  -4  -7    0.08    0.04 
  -2  -4   7    0.08    0.04 
  -2  -4   7    0.04    0.04 
   2  -4  -7    0.10    0.06 
  -2   4   6    0.32    0.05 
  -2   4   6    0.24    0.04 
  -2   4   6    0.23    0.05 
  -2   4   6    0.19    0.05 
   2   4  -6    0.27    0.04 
   2   4  -6    0.21    0.06 
  -2  -4   6    0.27    0.05 
  -2  -4   6    0.26    0.04 
  -2   4   5   43.88    0.76 
   2   4  -5   44.25    0.77 
   2   4  -5   43.01    0.79 
  -2   4   5   43.59    0.78 
  -2   4   5   44.78    0.77 
  -2   4   5   43.69    0.80 
  -2  -4   5   44.62    0.77 
  -2  -4   5   43.07    0.78 
  -2   4   4   23.69    0.46 
  -2   4   4   22.80    0.43 
  -2   4   4   22.91    0.44 
   2   4  -4   23.60    0.46 
  -2   4   4   23.12    0.44 
   2   4  -4   23.96    0.44 
  -2  -4   4   23.65    0.43 
  -2  -4   4   23.07    0.45 
  -2   4   3    0.33    0.04 
   2   4  -3    0.26    0.05 
  -2   4   3    0.29    0.04 
  -2   4   3    0.28    0.04 
   2   4  -3    0.32    0.04 
  -2   4   3    0.36    0.05 
  -2  -4   3    0.31    0.03 
  -2  -4   3    0.27    0.05 
  -2   4   2    0.01    0.03 
  -2   4   2    0.06    0.03 
  -2   4   2    0.09    0.04 
   2   4  -2    0.01    0.03 
   2   4  -2    0.07    0.03 
   2  -4  -2    0.14    0.04 
  -2  -4   2    0.07    0.04 
  -2   4   1   30.86    0.56 
  -2   4   1   30.45    0.55 
   2   4  -1   31.24    0.56 
  -2   4   1   31.53    0.53 
   2   4  -1   30.62    0.55 
  -2  -4   1   30.29    0.55 
   2  -4  -1   30.82    0.55 
  -2   4   0   17.12    0.30 
  -2   4   0   16.50    0.34 
   2   4   0   17.45    0.33 
   2   4   0   16.63    0.34 
  -2  -4   0   17.35    0.33 
   2  -4   0   16.77    0.33 
   2  -4   0   16.74    0.33 
   2   4   1    0.23    0.04 
  -2   4  -1    0.24    0.03 
   2   4   1    0.22    0.04 
  -2   4  -1    0.17    0.04 
   2   4   1    0.27    0.03 
   2  -4   1    0.27    0.04 
   2  -4   1    0.32    0.04 
  -2  -4  -1    0.16    0.04 
   2   4   2    0.04    0.02 
   2   4   2    0.00    0.03 
  -2   4  -2    0.08    0.04 
   2   4   2   -0.01    0.03 
  -2   4  -2    0.03    0.03 
   2  -4   2    0.01    0.03 
   2  -4   2    0.02    0.03 
  -2  -4  -2   -0.01    0.03 
  -2   4  -3    7.24    0.17 
  -2   4  -3    7.03    0.19 
   2   4   3    7.14    0.17 
   2   4   3    6.92    0.18 
  -2  -4  -3    6.78    0.19 
   2  -4   3    6.79    0.18 
   2  -4   3    6.88    0.18 
  -2  -4  -3    6.98    0.16 
  -2   4  -4    0.32    0.05 
   2   4   4    0.47    0.06 
   2   4   4    0.42    0.05 
  -2   4  -4    0.46    0.06 
  -2  -4  -4    0.43    0.06 
  -2  -4  -4    0.49    0.05 
   2  -4   4    0.43    0.05 
   2  -4   4    0.36    0.05 
   2   4   5    3.73    0.14 
  -2   4  -5    3.72    0.13 
  -2   4  -5    3.67    0.14 
   2   4   5    3.48    0.13 
  -2  -4  -5    3.57    0.14 
   2  -4   5    3.52    0.13 
  -2  -4  -5    3.75    0.11 
   2  -4   5    3.59    0.13 
   2   4   6   25.11    0.51 
   2   4   6   24.79    0.51 
  -2   4  -6   24.89    0.50 
  -2   4  -6   24.68    0.49 
  -2  -4  -6   25.04    0.50 
   2  -4   6   24.68    0.50 
   2  -4   6   24.10    0.48 
  -2   4  -7   13.63    0.32 
  -2   4  -7   14.16    0.33 
   2   4   7   13.99    0.34 
   2   4   7   13.82    0.34 
   2  -4   7   13.67    0.31 
  -2  -4  -7   13.98    0.33 
   2  -4   7   13.27    0.33 
   2   4   8    0.02    0.05 
   2   4   8    0.07    0.06 
  -2   4  -8    0.01    0.05 
  -2   4  -8    0.13    0.07 
   2  -4   8    0.00    0.04 
  -2  -4  -8    0.02    0.05 
   2  -4   8   -0.07    0.04 
  -2   4  -9    0.06    0.07 
   2   4   9    0.15    0.07 
  -2   4  -9    0.06    0.06 
   2   4   9   -0.03    0.05 
  -2  -4  -9    0.04    0.07 
   2  -4   9    0.03    0.05 
   2  -4   9    0.09    0.06 
  -2  -4  -9    0.16    0.06 
  -2   4 -10    0.03    0.06 
  -2   4 -10    0.10    0.08 
   2   4  10    0.10    0.06 
  -2  -4 -10    0.06    0.07 
  -2  -4 -10    0.13    0.06 
   2  -4  10    0.01    0.05 
  -2   4 -11    0.25    0.10 
   2   4  11    0.27    0.08 
  -2  -4 -11    0.33    0.10 
   2  -4  11    0.17    0.07 
   2   4  12    1.10    0.13 
  -2   4 -12    1.21    0.15 
  -2  -4 -12    1.03    0.14 
   2  -4  12    1.51    0.14 
  -2   4 -13    1.85    0.19 
   2   4  13    1.78    0.18 
   2  -4  13    1.98    0.17 
  -2  -4 -13    2.03    0.19 
  -2   4 -14    0.14    0.11 
   2   4  14    0.28    0.10 
   2  -4  14    0.33    0.10 
  -2  -4 -14    0.24    0.11 
   2   4  15    0.23    0.10 
  -2   4 -15    0.29    0.13 
   2  -4  15    0.24    0.10 
  -2  -4 -15    0.15    0.12 
  -2  -5  16    0.23    0.10 
   2   5 -15    0.01    0.12 
  -2   5  15    0.16    0.10 
   2  -5 -15   -0.14    0.09 
  -2  -5  15   -0.04    0.08 
   2   5 -14    0.19    0.11 
  -2   5  14    0.28    0.10 
   2  -5 -14    0.32    0.11 
  -2  -5  14    0.35    0.09 
   2   5 -13    1.59    0.17 
  -2   5  13    1.52    0.17 
  -2  -5  13    1.68    0.15 
   2  -5 -13    1.44    0.16 
   2   5 -12    1.81    0.19 
  -2   5  12    1.64    0.16 
  -2  -5  12    1.46    0.13 
   2  -5 -12    1.84    0.16 
  -2  -5  12    1.66    0.14 
   2   5 -11    0.00    0.09 
  -2   5  11    0.14    0.07 
  -2  -5  11    0.18    0.06 
  -2  -5  11    0.03    0.05 
   2  -5 -11    0.20    0.08 
   2   5 -10    1.62    0.17 
  -2   5  10    1.49    0.14 
  -2  -5  10    1.58    0.12 
   2  -5 -10    1.52    0.15 
  -2  -5  10    1.53    0.12 
   2   5  -9    2.65    0.18 
  -2   5   9    2.72    0.16 
   2   5  -9    3.22    0.14 
  -2   5   9    3.01    0.13 
  -2  -5   9    3.06    0.15 
   2  -5  -9    3.03    0.14 
   2  -5  -9    3.10    0.17 
  -2  -5   9    3.31    0.15 
   2   5  -8    3.33    0.14 
  -2   5   8    3.71    0.14 
   2   5  -8    3.49    0.18 
  -2   5   8    3.31    0.16 
  -2  -5   8    3.31    0.15 
   2  -5  -8    3.49    0.14 
  -2  -5   8    3.57    0.14 
   2  -5  -8    3.66    0.17 
  -2   5   7    0.84    0.10 
   2   5  -7    0.70    0.10 
  -2   5   7    0.79    0.09 
   2   5  -7    0.73    0.08 
  -2   5   7    0.73    0.08 
  -2  -5   7    0.78    0.08 
   2  -5  -7    0.66    0.07 
  -2  -5   7    0.80    0.07 
  -2   5   6    0.09    0.04 
  -2   5   6    0.17    0.05 
   2   5  -6    0.02    0.06 
  -2   5   6    0.20    0.05 
  -2   5   6    0.14    0.05 
   2   5  -6    0.15    0.04 
  -2  -5   6    0.12    0.03 
  -2  -5   6    0.10    0.05 
  -2   5   5    0.67    0.07 
  -2   5   5    0.62    0.06 
  -2   5   5    0.67    0.08 
   2   5  -5    0.53    0.07 
  -2   5   5    0.62    0.07 
   2   5  -5    0.61    0.07 
  -2  -5   5    0.67    0.08 
  -2  -5   5    0.59    0.05 
  -2   5   4    4.44    0.15 
   2   5  -4    4.55    0.16 
  -2   5   4    4.65    0.15 
  -2   5   4    4.97    0.14 
   2   5  -4    4.71    0.15 
  -2   5   4    4.94    0.15 
  -2  -5   4    4.74    0.16 
  -2  -5   4    4.57    0.12 
   2   5  -3    0.97    0.09 
  -2   5   3    1.22    0.08 
  -2   5   3    1.21    0.07 
   2   5  -3    1.10    0.08 
  -2   5   3    1.31    0.08 
   2  -5  -3    1.18    0.08 
  -2  -5   3    0.92    0.08 
  -2  -5   3    1.15    0.05 
   2   5  -2    1.81    0.09 
   2   5  -2    1.58    0.09 
  -2   5   2    1.79    0.09 
  -2   5   2    1.66    0.09 
  -2   5   2    1.90    0.08 
   2  -5  -2    1.80    0.09 
  -2  -5   2    1.69    0.09 
   2   5  -1    3.35    0.12 
   2   5  -1    3.23    0.12 
  -2   5   1    3.16    0.12 
  -2   5   1    3.41    0.10 
  -2  -5   1    3.41    0.12 
   2  -5  -1    3.25    0.12 
   2  -5  -1    3.34    0.11 
  -2   5   0    3.43    0.10 
   2   5   0    3.46    0.12 
  -2   5   0    2.96    0.12 
   2   5   0    3.40    0.12 
   2  -5   0    3.25    0.11 
   2  -5   0    3.00    0.12 
  -2  -5   0    3.37    0.12 
  -2   5  -1    7.43    0.20 
   2   5   1    6.82    0.18 
   2   5   1    6.64    0.19 
  -2   5  -1    7.39    0.16 
   2   5   1    7.31    0.15 
   2  -5   1    6.95    0.19 
   2  -5   1    7.38    0.17 
  -2  -5  -1    6.73    0.18 
   2   5   2   20.05    0.41 
   2   5   2   20.81    0.38 
  -2   5  -2   20.16    0.41 
  -2   5  -2   20.49    0.38 
   2   5   2   19.99    0.41 
  -2  -5  -2   20.55    0.39 
   2  -5   2   20.77    0.39 
   2  -5   2   20.10    0.41 
   2   5   3    5.05    0.16 
   2   5   3    5.26    0.17 
  -2   5  -3    5.15    0.17 
   2   5   3    5.48    0.14 
  -2   5  -3    5.22    0.15 
   2  -5   3    5.14    0.16 
  -2  -5  -3    5.30    0.14 
   2  -5   3    5.18    0.15 
   2   5   4    0.13    0.04 
  -2   5  -4    0.13    0.05 
  -2   5  -4    0.20    0.05 
   2   5   4    0.14    0.05 
  -2  -5  -4    0.11    0.04 
  -2  -5  -4    0.14    0.05 
   2  -5   4    0.27    0.05 
   2  -5   4    0.15    0.04 
  -2   5  -5    0.04    0.05 
   2   5   5    0.09    0.04 
   2   5   5    0.01    0.04 
  -2   5  -5    0.05    0.05 
   2  -5   5    0.08    0.05 
   2  -5   5    0.04    0.04 
  -2  -5  -5    0.07    0.05 
  -2  -5  -5    0.08    0.04 
  -2   5  -6    0.05    0.05 
   2   5   6    0.08    0.05 
   2   5   6    0.11    0.05 
  -2   5  -6    0.14    0.06 
  -2  -5  -6    0.05    0.04 
   2  -5   6    0.10    0.05 
  -2  -5  -6    0.07    0.05 
   2  -5   6    0.10    0.05 
  -2   5  -7    0.14    0.07 
   2   5   7    0.16    0.06 
   2   5   7    0.10    0.06 
  -2   5  -7    0.13    0.06 
   2  -5   7    0.16    0.05 
  -2  -5  -7    0.26    0.06 
   2  -5   7    0.20    0.06 
  -2   5  -8    0.05    0.07 
   2   5   8    0.07    0.06 
   2   5   8    0.06    0.06 
  -2   5  -8    0.00    0.05 
  -2  -5  -8    0.00    0.06 
   2  -5   8    0.10    0.05 
   2  -5   8    0.00    0.05 
  -2   5  -9    0.23    0.07 
   2   5   9    0.19    0.07 
   2   5   9    0.27    0.08 
  -2   5  -9    0.31    0.09 
  -2  -5  -9    0.16    0.07 
   2  -5   9    0.21    0.06 
   2  -5   9    0.08    0.06 
  -2   5 -10    6.18    0.25 
  -2   5 -10    6.83    0.23 
   2   5  10    7.00    0.26 
  -2  -5 -10    7.12    0.24 
  -2  -5 -10    6.34    0.26 
   2  -5  10    6.52    0.24 
  -2   5 -11    1.20    0.14 
   2   5  11    1.00    0.12 
   2  -5  11    1.16    0.13 
  -2  -5 -11    0.79    0.12 
   2   5  12    0.32    0.09 
  -2   5 -12    0.27    0.11 
   2  -5  12    0.35    0.09 
  -2  -5 -12    0.25    0.10 
  -2   5 -13    0.20    0.11 
   2   5  13    0.31    0.10 
  -2  -5 -13    0.16    0.10 
   2  -5  13    0.25    0.08 
  -2   5 -14    2.16    0.23 
   2   5  14    1.82    0.19 
  -2  -5 -14    1.70    0.19 
   2  -5  14    1.44    0.17 
   2   5  15    2.28    0.23 
  -2   5 -15    2.13    0.24 
   2  -5  15    2.48    0.20 
   2   6 -15    0.48    0.15 
  -2   6  15    0.33    0.11 
   2  -6 -15    0.28    0.12 
  -2   6  14    0.17    0.09 
   2   6 -14    0.04    0.12 
   2  -6 -14    0.24    0.11 
  -2   6  13    0.05    0.08 
   2   6 -13    0.05    0.11 
   2  -6 -13    0.11    0.09 
  -2   6  12    1.47    0.16 
   2   6 -12    1.21    0.16 
   2  -6 -12    1.16    0.14 
  -2  -6  12    1.39    0.13 
  -2   6  11    0.12    0.07 
   2   6 -11    0.00    0.09 
  -2  -6  11    0.03    0.05 
   2  -6 -11    0.14    0.09 
  -2  -6  11    0.04    0.06 
   2   6 -10    0.03    0.08 
  -2   6  10    0.08    0.06 
  -2  -6  10    0.06    0.05 
  -2  -6  10    0.04    0.06 
   2  -6 -10    0.14    0.08 
  -2   6   9    0.62    0.09 
   2   6  -9    0.47    0.10 
  -2   6   9    0.41    0.08 
   2   6  -9    0.52    0.08 
   2  -6  -9    0.62    0.08 
   2  -6  -9    0.66    0.10 
  -2  -6   9    0.49    0.08 
  -2  -6   9    0.51    0.07 
  -2   6   8    0.05    0.05 
   2   6  -8    0.12    0.05 
   2   6  -8    0.01    0.08 
  -2   6   8   -0.05    0.05 
   2  -6  -8    0.09    0.05 
   2  -6  -8    0.00    0.06 
  -2  -6   8    0.09    0.06 
  -2  -6   8    0.00    0.04 
   2   6  -7    1.98    0.15 
   2   6  -7    2.38    0.12 
  -2   6   7    2.15    0.13 
  -2   6   7    2.37    0.12 
  -2   6   7    2.11    0.12 
  -2   6   7    2.26    0.13 
  -2  -6   7    1.95    0.10 
  -2  -6   7    1.84    0.13 
  -2   6   6    0.50    0.07 
   2   6  -6    0.51    0.07 
  -2   6   6    0.53    0.07 
  -2   6   6    0.53    0.07 
   2   6  -6    0.51    0.08 
  -2   6   6    0.63    0.07 
  -2  -6   6    0.55    0.08 
  -2  -6   6    0.50    0.05 
  -2   6   5    1.42    0.10 
  -2   6   5    1.22    0.10 
   2   6  -5    1.26    0.10 
   2   6  -5    1.24    0.12 
  -2   6   5    1.35    0.09 
  -2   6   5    1.43    0.10 
  -2  -6   5    1.39    0.07 
  -2  -6   5    1.32    0.11 
  -2   6   4    0.84    0.07 
   2   6  -4    0.75    0.08 
  -2   6   4    0.78    0.08 
   2   6  -4    0.70    0.08 
  -2   6   4    0.78    0.08 
  -2   6   4    0.76    0.08 
  -2  -6   4    0.89    0.05 
  -2  -6   4    0.91    0.09 
   2   6  -3    2.90    0.12 
  -2   6   3    2.78    0.12 
  -2   6   3    2.94    0.11 
  -2   6   3    2.81    0.12 
   2   6  -3    2.78    0.13 
   2  -6  -3    2.88    0.11 
  -2  -6   3    2.82    0.13 
  -2  -6   3    2.95    0.07 
  -2   6   2    3.97    0.14 
   2   6  -2    3.72    0.14 
   2   6  -2    3.76    0.14 
  -2   6   2    3.83    0.12 
   2  -6  -2    4.00    0.13 
   2  -6  -2    3.79    0.14 
  -2  -6   2    3.64    0.14 
   2   6  -1   11.09    0.27 
  -2   6   1   10.96    0.27 
  -2   6   1   11.37    0.24 
   2   6  -1   11.06    0.26 
   2  -6  -1   11.13    0.27 
   2  -6  -1   11.21    0.25 
  -2  -6   1   11.09    0.27 
  -2   6   0    2.42    0.09 
   2   6   0    2.28    0.11 
  -2   6   0    2.25    0.12 
   2   6   0    2.29    0.11 
  -2  -6   0    2.39    0.11 
   2  -6   0    2.33    0.11 
   2  -6   0    2.39    0.10 
   2   6   1    0.00    0.04 
  -2   6  -1    0.00    0.03 
   2   6   1    0.02    0.04 
  -2   6  -1    0.06    0.04 
  -2  -6  -1   -0.03    0.02 
  -2  -6  -1    0.03    0.04 
   2  -6   1    0.02    0.03 
   2  -6   1    0.01    0.04 
   2   6   2    0.21    0.03 
   2   6   2    0.16    0.04 
   2   6   2    0.06    0.04 
  -2   6  -2    0.20    0.05 
  -2   6  -2    0.17    0.04 
   2  -6   2    0.17    0.04 
  -2  -6  -2    0.08    0.04 
   2  -6   2    0.07    0.05 
  -2   6  -3    3.73    0.13 
  -2   6  -3    3.96    0.15 
   2   6   3    3.82    0.15 
   2   6   3    4.05    0.15 
   2   6   3    3.97    0.12 
   2  -6   3    3.86    0.15 
   2  -6   3    3.89    0.13 
  -2  -6  -3    3.81    0.13 
   2   6   4    0.27    0.05 
  -2   6  -4    0.28    0.06 
  -2   6  -4    0.20    0.06 
   2   6   4    0.10    0.05 
  -2  -6  -4    0.18    0.06 
   2  -6   4    0.28    0.05 
   2  -6   4    0.13    0.06 
  -2  -6  -4    0.15    0.05 
  -2   6  -5    0.51    0.08 
   2   6   5    0.58    0.07 
   2   6   5    0.56    0.08 
  -2   6  -5    0.45    0.07 
   2  -6   5    0.57    0.07 
  -2  -6  -5    0.54    0.06 
  -2  -6  -5    0.45    0.07 
   2  -6   5    0.46    0.07 
  -2   6  -6    2.05    0.14 
  -2   6  -6    2.05    0.13 
   2   6   6    2.08    0.12 
   2   6   6    2.13    0.13 
   2  -6   6    2.20    0.12 
  -2  -6  -6    2.13    0.11 
   2  -6   6    2.08    0.13 
  -2  -6  -6    2.28    0.14 
   2   6   7    0.06    0.06 
  -2   6  -7    0.07    0.07 
  -2   6  -7    0.11    0.06 
   2   6   7    0.12    0.06 
   2  -6   7    0.05    0.05 
   2  -6   7    0.06    0.06 
  -2  -6  -7    0.07    0.06 
   2   6   8    0.01    0.05 
  -2   6  -8   -0.01    0.06 
  -2   6  -8    0.07    0.08 
   2   6   8    0.01    0.06 
   2  -6   8    0.03    0.06 
   2  -6   8    0.11    0.06 
  -2  -6  -8    0.14    0.07 
   2   6   9    6.73    0.25 
  -2   6  -9    6.89    0.24 
   2   6   9    6.78    0.25 
  -2   6  -9    7.17    0.26 
   2  -6   9    6.92    0.23 
  -2  -6  -9    6.98    0.24 
   2  -6   9    6.58    0.24 
  -2   6 -10    2.44    0.16 
   2   6  10    2.40    0.18 
   2   6  10    2.99    0.17 
  -2   6 -10    2.05    0.18 
   2  -6  10    2.26    0.15 
  -2  -6 -10    2.23    0.16 
  -2   6 -11    0.34    0.11 
   2   6  11    0.14    0.08 
   2  -6  11    0.32    0.08 
  -2  -6 -11    0.31    0.10 
   2   6  12    0.74    0.12 
  -2   6 -12    0.44    0.12 
   2  -6  12    0.69    0.11 
  -2  -6 -12    0.81    0.13 
  -2   6 -13    0.01    0.10 
   2   6  13   -0.08    0.08 
   2  -6  13   -0.01    0.07 
  -2  -6 -13    0.03    0.09 
   2   6  14    0.07    0.10 
   2  -6  14    0.13    0.09 
  -2  -6 -14    0.11    0.11 
   2  -6  15    0.32    0.11 
  -2   7  15    0.15    0.11 
   2   7 -15    0.12    0.13 
  -2   7  14    0.18    0.10 
   2   7 -14    0.09    0.13 
   2  -7 -14    0.14    0.11 
   2   7 -13   -0.07    0.11 
  -2   7  13    0.07    0.08 
   2  -7 -13   -0.05    0.09 
  -2   7  12    0.62    0.11 
   2   7 -12    0.58    0.13 
  -2  -7  12    0.51    0.10 
   2  -7 -12    0.66    0.12 
   2   7 -11    4.71    0.26 
  -2   7  11    5.18    0.24 
  -2  -7  11    5.27    0.23 
   2  -7 -11    4.96    0.24 
  -2   7  10    1.03    0.12 
   2   7 -10    0.86    0.13 
  -2  -7  10    0.88    0.11 
   2  -7 -10    1.06    0.13 
  -2   7   9    0.13    0.07 
   2   7  -9   -0.03    0.05 
   2   7  -9   -0.05    0.08 
   2  -7  -9   -0.02    0.05 
   2  -7  -9    0.05    0.07 
  -2  -7   9    0.06    0.06 
   2   7  -8    1.97    0.12 
  -2   7   8    1.49    0.12 
  -2   7   8    1.67    0.13 
   2   7  -8    1.79    0.16 
  -2   7   8    1.55    0.13 
   2  -7  -8    1.62    0.12 
  -2  -7   8    1.79    0.14 
   2   7  -7   14.15    0.34 
   2   7  -7   13.88    0.37 
  -2   7   7   14.02    0.33 
  -2   7   7   13.31    0.35 
  -2   7   7   14.04    0.35 
  -2   7   7   13.89    0.35 
  -2  -7   7   13.55    0.35 
   2   7  -6    0.02    0.05 
   2   7  -6   -0.06    0.07 
  -2   7   6    0.14    0.06 
  -2   7   6    0.05    0.05 
  -2   7   6    0.04    0.05 
  -2   7   6    0.06    0.05 
  -2  -7   6    0.13    0.06 
  -2   7   5   11.52    0.29 
   2   7  -5   11.64    0.30 
   2   7  -5   11.96    0.31 
  -2   7   5   11.68    0.29 
  -2   7   5   11.62    0.29 
  -2   7   5   12.19    0.30 
  -2  -7   5   11.61    0.31 
  -2   7   4    2.80    0.12 
   2   7  -4    2.94    0.14 
  -2   7   4    2.86    0.14 
   2   7  -4    3.02    0.15 
   2  -7  -4    3.03    0.14 
  -2  -7   4    2.93    0.15 
   2  -7  -4    3.18    0.14 
   2   7  -3    0.52    0.07 
  -2   7   3    0.63    0.08 
   2   7  -3    0.55    0.08 
  -2   7   3    0.59    0.06 
   2  -7  -3    0.59    0.07 
  -2  -7   3    0.47    0.07 
   2  -7  -3    0.53    0.08 
   2   7  -2    3.97    0.16 
  -2   7   2    3.89    0.13 
   2   7  -2    4.06    0.15 
  -2   7   2    4.05    0.16 
  -2  -7   2    4.05    0.16 
   2  -7  -2    3.84    0.16 
   2  -7  -2    4.08    0.14 
   2   7  -1    4.15    0.15 
   2   7  -1    4.34    0.16 
  -2   7   1    4.30    0.13 
  -2   7   1    4.22    0.16 
  -2  -7   1    4.31    0.16 
   2  -7  -1    4.18    0.14 
   2  -7  -1    3.95    0.16 
   2   7   0    0.99    0.10 
  -2   7   0    0.79    0.09 
   2   7   0    0.83    0.08 
  -2   7   0    1.07    0.07 
  -2  -7   0    0.83    0.09 
   2  -7   0    0.82    0.08 
   2  -7   0    0.76    0.08 
   2   7   1    1.40    0.11 
  -2   7  -1    1.49    0.11 
  -2   7  -1    1.49    0.08 
   2   7   1    1.27    0.09 
   2  -7   1    1.46    0.09 
  -2  -7  -1    1.41    0.10 
   2  -7   1    1.36    0.11 
  -2   7  -2    2.58    0.14 
   2   7   2    2.78    0.13 
  -2   7  -2    2.77    0.11 
   2   7   2    2.51    0.14 
  -2  -7  -2    2.67    0.13 
   2  -7   2    2.75    0.11 
   2  -7   2    2.74    0.14 
   2   7   3    0.21    0.04 
  -2   7  -3    0.16    0.06 
   2   7   3    0.26    0.06 
   2   7   3    0.24    0.06 
  -2   7  -3    0.24    0.05 
   2  -7   3    0.29    0.07 
   2  -7   3    0.24    0.05 
  -2  -7  -3    0.30    0.06 
   2   7   4    0.12    0.05 
  -2   7  -4    0.07    0.05 
  -2   7  -4    0.04    0.05 
   2   7   4   -0.01    0.04 
   2   7   4    0.05    0.05 
  -2  -7  -4    0.01    0.05 
   2  -7   4    0.02    0.06 
   2  -7   4    0.01    0.04 
   2   7   5    0.30    0.07 
   2   7   5    0.34    0.06 
  -2   7  -5    0.22    0.07 
  -2   7  -5    0.36    0.07 
  -2  -7  -5    0.31    0.06 
   2  -7   5    0.25    0.05 
  -2  -7  -5    0.29    0.07 
   2  -7   5    0.35    0.08 
  -2   7  -6    2.19    0.14 
  -2   7  -6    1.89    0.14 
   2   7   6    2.16    0.12 
   2   7   6    2.11    0.14 
   2  -7   6    2.11    0.12 
  -2  -7  -6    1.93    0.11 
  -2  -7  -6    2.27    0.15 
   2  -7   6    2.19    0.14 
   2   7   7    0.41    0.08 
  -2   7  -7    0.54    0.09 
   2   7   7    0.36    0.07 
  -2   7  -7    0.54    0.09 
   2  -7   7    0.57    0.09 
  -2  -7  -7    0.43    0.08 
   2  -7   7    0.41    0.07 
  -2   7  -8   -0.02    0.07 
   2   7   8   -0.06    0.06 
  -2   7  -8    0.12    0.07 
   2   7   8    0.02    0.06 
   2  -7   8    0.19    0.07 
  -2  -7  -8   -0.06    0.06 
   2  -7   8    0.06    0.05 
  -2   7  -9    3.00    0.17 
  -2   7  -9    2.71    0.18 
   2   7   9    3.25    0.18 
   2   7   9    2.86    0.17 
   2  -7   9    2.76    0.16 
   2  -7   9    3.00    0.17 
  -2  -7  -9    3.32    0.18 
   2   7  10   -0.09    0.07 
  -2   7 -10    0.05    0.09 
  -2   7 -10    0.08    0.07 
   2   7  10   -0.11    0.06 
   2  -7  10    0.10    0.07 
   2  -7  10   -0.01    0.06 
  -2  -7 -10    0.12    0.07 
   2   7  11    0.21    0.09 
  -2  -7 -11    0.30    0.10 
   2  -7  11    0.24    0.08 
   2   7  12    0.71    0.12 
  -2  -7 -12    1.02    0.14 
   2   7  13    0.22    0.10 
  -2  -7 -13    0.22    0.12 
   2   7  14    1.11    0.15 
   2   8 -14   -0.04    0.13 
  -2   8  14    0.12    0.10 
   2  -8 -14    0.04    0.10 
  -2   8  13    0.25    0.10 
   2   8 -13    0.14    0.14 
   2  -8 -13    0.52    0.12 
   2   8 -12    0.78    0.15 
  -2   8  12    0.84    0.13 
   2  -8 -12    0.75    0.13 
  -2  -8  12    0.85    0.13 
   2   8 -11    1.43    0.17 
  -2   8  11    1.03    0.13 
  -2  -8  11    1.10    0.13 
   2  -8 -11    1.01    0.14 
  -2   8  10    0.73    0.11 
   2   8 -10    0.70    0.13 
  -2  -8  10    0.70    0.11 
   2  -8 -10    0.81    0.12 
  -2   8   9    2.89    0.17 
  -2   8   9    2.43    0.17 
   2   8  -9    2.92    0.16 
   2   8  -9    2.89    0.20 
   2  -8  -9    2.78    0.17 
   2  -8  -9    2.63    0.17 
  -2  -8   9    2.76    0.18 
  -2   8   8    0.56    0.09 
   2   8  -8    0.88    0.12 
  -2   8   8    0.64    0.09 
   2   8  -8    0.77    0.10 
  -2   8   8    0.66    0.09 
   2  -8  -8    0.62    0.09 
  -2  -8   8    0.52    0.10 
  -2   8   7    0.23    0.07 
  -2   8   7    0.27    0.07 
   2   8  -7    0.24    0.07 
   2   8  -7    0.19    0.08 
  -2   8   7    0.15    0.07 
  -2   8   7    0.21    0.07 
  -2  -8   7    0.33    0.08 
  -2   8   6    6.12    0.21 
  -2   8   6    6.11    0.22 
   2   8  -6    5.68    0.23 
   2   8  -6    5.94    0.21 
  -2   8   6    5.92    0.21 
   2  -8  -6    6.03    0.21 
  -2  -8   6    5.94    0.22 
  -2   8   5    0.07    0.06 
   2   8  -5    0.03    0.06 
  -2   8   5    0.07    0.05 
   2   8  -5    0.03    0.06 
  -2  -8   5    0.13    0.07 
   2  -8  -5    0.00    0.06 
   2  -8  -5    0.17    0.07 
   2   8  -4    8.93    0.26 
  -2   8   4    8.90    0.27 
   2   8  -4    8.98    0.26 
  -2   8   4    9.30    0.24 
  -2  -8   4    8.78    0.27 
   2  -8  -4    9.06    0.26 
   2  -8  -4    9.37    0.25 
  -2   8   3    0.55    0.08 
   2   8  -3    0.76    0.09 
  -2   8   3    0.67    0.07 
   2   8  -3    0.55    0.08 
  -2  -8   3    0.64    0.09 
   2  -8  -3    0.59    0.07 
   2  -8  -3    0.60    0.09 
   2   8  -2    0.27    0.07 
   2   8  -2    0.11    0.06 
  -2   8   2    0.30    0.05 
  -2   8   2    0.23    0.06 
   2  -8  -2    0.17    0.05 
  -2  -8   2    0.15    0.07 
   2  -8  -2    0.26    0.07 
  -2   8   1    0.12    0.06 
   2   8  -1    0.18    0.06 
  -2   8   1    0.21    0.05 
   2   8  -1    0.11    0.06 
   2  -8  -1    0.14    0.05 
   2  -8  -1    0.14    0.06 
  -2  -8   1    0.31    0.07 
   2   8   0    1.10    0.10 
  -2   8   0    1.19    0.08 
  -2   8   0    1.00    0.11 
   2   8   0    1.13    0.11 
  -2  -8   0    1.17    0.11 
   2  -8   0    1.00    0.10 
   2  -8   0    1.04    0.09 
   2   8   1    6.72    0.21 
   2   8   1    6.86    0.23 
  -2   8  -1    6.39    0.22 
  -2   8  -1    6.97    0.19 
  -2  -8  -1    6.79    0.22 
   2  -8   1    6.57    0.22 
   2  -8   1    7.04    0.19 
   2   8   2    0.17    0.06 
   2   8   2    0.09    0.06 
  -2   8  -2    0.08    0.06 
  -2   8  -2    0.16    0.05 
  -2  -8  -2    0.13    0.06 
   2  -8   2    0.14    0.07 
  -2   8  -3    0.31    0.06 
  -2   8  -3    0.25    0.07 
   2   8   3    0.30    0.07 
   2   8   3    0.25    0.07 
  -2  -8  -3    0.30    0.07 
   2  -8   3    0.24    0.08 
   2   8   4    0.33    0.07 
  -2   8  -4    0.28    0.07 
   2   8   4    0.30    0.07 
  -2   8  -4    0.25    0.06 
   2  -8   4    0.37    0.08 
  -2  -8  -4    0.28    0.07 
  -2   8  -5    0.12    0.07 
   2   8   5    0.13    0.06 
  -2  -8  -5    0.14    0.06 
   2  -8   5    0.12    0.07 
  -2  -8  -5    0.02    0.06 
   2   8   6   17.49    0.43 
  -2   8  -6   17.09    0.43 
  -2  -8  -6   17.54    0.44 
   2  -8   6   17.94    0.43 
   2   8   7    0.20    0.07 
  -2   8  -7    0.17    0.07 
  -2  -8  -7    0.20    0.08 
   2  -8   7    0.28    0.08 
   2   8   8    3.44    0.19 
  -2   8  -8    3.76    0.19 
   2  -8   8    3.62    0.19 
  -2  -8  -8    3.58    0.19 
   2   8   9    1.23    0.14 
  -2   8  -9    1.38    0.14 
  -2  -8  -9    1.33    0.14 
   2  -8   9    1.66    0.15 
  -2   8 -10    0.15    0.08 
   2   8  10    0.23    0.09 
   2  -8  10    0.48    0.10 
  -2  -8 -10    0.32    0.10 
   2   8  11    0.14    0.09 
  -2  -8 -12    0.02    0.10 
  -2  -8 -13    0.30    0.12 
  -2  -9  13    0.16    0.11 
   2  -9 -13    0.16    0.12 
   2   9 -12    1.81    0.19 
  -2  -9  12    2.30    0.19 
   2  -9 -12    1.81    0.20 
   2   9 -11    0.13    0.11 
  -2  -9  11    0.30    0.10 
   2  -9 -11    0.45    0.11 
   2   9 -10   -0.03    0.10 
   2  -9 -10    0.09    0.08 
  -2  -9  10    0.06    0.08 
   2   9  -9    0.24    0.10 
  -2   9   9    0.15    0.08 
   2   9  -9    0.12    0.08 
   2  -9  -9    0.18    0.08 
  -2  -9   9    0.08    0.08 
  -2   9   8    0.81    0.11 
   2   9  -8    1.15    0.12 
   2   9  -8    0.65    0.11 
   2  -9  -8    0.76    0.11 
  -2  -9   8    0.84    0.12 
   2  -9  -8    0.85    0.11 
  -2   9   7    0.69    0.10 
   2   9  -7    0.35    0.09 
   2   9  -7    0.49    0.09 
  -2   9   7    0.64    0.09 
   2  -9  -7    0.58    0.09 
   2  -9  -7    0.47    0.09 
  -2  -9   7    0.65    0.11 
  -2   9   6    3.33    0.18 
  -2   9   6    3.43    0.16 
   2   9  -6    3.31    0.18 
   2   9  -6    3.37    0.17 
  -2  -9   6    3.08    0.18 
   2  -9  -6    3.10    0.17 
   2   9  -5    0.14    0.07 
  -2   9   5    0.27    0.07 
  -2   9   5    0.21    0.07 
   2   9  -5    0.15    0.08 
   2  -9  -5    0.27    0.08 
  -2  -9   5    0.21    0.08 
   2   9  -4    0.24    0.07 
  -2   9   4    0.17    0.07 
   2   9  -4    0.22    0.07 
  -2   9   4    0.09    0.05 
  -2  -9   4   -0.01    0.07 
   2  -9  -4    0.15    0.07 
   2   9  -3    1.29    0.13 
  -2   9   3    1.56    0.11 
  -2   9   3    1.76    0.14 
   2   9  -3    1.31    0.12 
  -2  -9   3    1.40    0.14 
   2  -9  -3    1.51    0.14 
   2   9  -2    1.98    0.14 
  -2   9   2    1.92    0.12 
  -2   9   2    1.74    0.13 
   2   9  -2    1.83    0.13 
  -2  -9   2    1.77    0.14 
   2  -9  -2    1.65    0.13 
  -2   9   1   11.21    0.32 
   2   9  -1   11.64    0.32 
   2   9  -1   11.73    0.30 
  -2  -9   1   11.44    0.31 
   2  -9  -1   11.17    0.31 
   2   9   0    2.28    0.15 
  -2   9   0    2.43    0.15 
   2   9   0    2.55    0.14 
  -2  -9   0    2.40    0.15 
   2  -9   0    2.45    0.15 
   2   9   1    0.33    0.07 
  -2   9  -1    0.37    0.08 
   2   9   1    0.44    0.08 
   2  -9   1    0.34    0.08 
  -2  -9  -1    0.44    0.09 
   2   9   2    0.11    0.06 
  -2   9  -2   -0.11    0.06 
   2   9   2   -0.04    0.06 
   2  -9   2   -0.08    0.06 
  -2  -9  -2   -0.06    0.06 
  -2   9  -3    1.81    0.14 
   2   9   3    1.78    0.14 
   2   9   3    1.49    0.12 
   2  -9   3    1.97    0.15 
  -2  -9  -3    1.97    0.13 
   2   9   4    0.10    0.06 
   2   9   4    0.20    0.07 
  -2   9  -4    0.27    0.08 
  -2  -9  -4    0.30    0.07 
   2  -9   4    0.19    0.08 
  -2   9  -5    0.39    0.09 
   2   9   5    0.56    0.09 
  -2  -9  -5    0.63    0.09 
  -2  -9  -5    0.54    0.10 
   2  -9   5    0.64    0.10 
   2   9   6    5.94    0.23 
  -2   9  -6    5.85    0.24 
   2  -9   6    5.73    0.24 
  -2  -9  -6    5.76    0.24 
   2   9   7    0.73    0.10 
  -2   9  -7    0.50    0.10 
   2  -9   7    0.57    0.10 
  -2  -9  -7    0.39    0.10 
  -2   9  -8    0.94    0.12 
   2   9   8    1.12    0.13 
  -2  -9  -8    0.97    0.12 
   2  -9   8    1.12    0.13 
   2   9   9    0.69    0.12 
  -2   9  -9    0.85    0.12 
  -2  -9  -9    0.83    0.12 
   2  -9   9    0.75    0.12 
  -2   9 -10    0.57    0.11 
   2   9  10    0.61    0.12 
  -2  -9 -10    0.79    0.12 
   2  -9  10    0.49    0.11 
   2   9  11   -0.02    0.09 
  -2  -9 -12    0.31    0.12 
  -2 -10  13   -0.01    0.09 
   2 -10 -13   -0.07    0.10 
   2 -10 -12    0.29    0.12 
  -2 -10  12    0.48    0.12 
   2 -10 -11    0.09    0.09 
  -2 -10  11   -0.10    0.08 
   2 -10 -10    0.10    0.09 
  -2 -10  10    0.14    0.10 
   2  10  -9   -0.05    0.09 
  -2 -10   9    0.01    0.08 
   2 -10  -9    0.06    0.08 
  -2  10   8    1.27    0.14 
   2  10  -8    1.16    0.13 
   2  10  -8    1.18    0.14 
  -2 -10   8    0.84    0.13 
   2 -10  -8    1.09    0.13 
   2  10  -7    0.11    0.08 
  -2  10   7    0.04    0.07 
   2  10  -7   -0.03    0.06 
   2 -10  -7    0.24    0.09 
  -2 -10   7    0.03    0.08 
  -2  10   6    0.29    0.08 
   2  10  -6    0.27    0.09 
   2  10  -6    0.39    0.09 
   2 -10  -6    0.14    0.08 
  -2 -10   6    0.50    0.11 
  -2  10   5    0.24    0.08 
   2  10  -5    0.24    0.08 
   2  10  -5    0.33    0.09 
  -2 -10   5    0.17    0.09 
   2 -10  -5    0.28    0.09 
   2  10  -4    4.20    0.20 
   2  10  -4    4.11    0.19 
  -2  10   4    3.94    0.20 
  -2 -10   4    3.84    0.20 
   2 -10  -4    3.87    0.19 
  -2  10   3    0.59    0.10 
   2  10  -3    0.68    0.10 
   2  10  -3    0.71    0.09 
   2 -10  -3    0.75    0.10 
  -2 -10   3    0.79    0.11 
   2  10  -2    0.12    0.07 
  -2  10   2    0.02    0.07 
   2  10  -2   -0.07    0.05 
  -2 -10   2    0.04    0.07 
   2 -10  -2    0.18    0.08 
   2  10  -1   -0.04    0.06 
   2  10  -1   -0.01    0.05 
  -2  10   1    0.09    0.07 
   2 -10  -1    0.04    0.07 
  -2 -10   1    0.00    0.07 
   2  10   0    3.27    0.18 
  -2  10   0    2.61    0.16 
   2  10   0    3.01    0.16 
  -2 -10   0    2.97    0.17 
   2 -10   0    2.96    0.17 
  -2  10  -1    6.47    0.25 
   2  10   1    7.07    0.24 
   2  10   1    6.77    0.25 
   2 -10   1    7.27    0.26 
  -2 -10  -1    7.05    0.24 
   2  10   2    0.00    0.06 
   2  10   2    0.02    0.05 
  -2  10  -2   -0.07    0.06 
  -2 -10  -2   -0.05    0.06 
   2 -10   2    0.01    0.07 
   2  10   3    1.96    0.16 
   2  10   3    1.90    0.14 
  -2  10  -3    2.23    0.16 
  -2 -10  -3    2.06    0.15 
   2 -10   3    1.99    0.16 
  -2  10  -4    0.31    0.09 
   2  10   4    0.21    0.08 
   2  10   4    0.38    0.08 
  -2 -10  -4    0.31    0.08 
   2 -10   4    0.33    0.09 
  -2  10  -5    1.46    0.14 
   2  10   5    1.49    0.14 
  -2 -10  -5    1.26    0.13 
   2 -10   5    1.40    0.16 
  -2 -10  -5    1.19    0.14 
  -2  10  -6    1.59    0.16 
   2  10   6    1.71    0.15 
  -2 -10  -6    1.48    0.15 
   2 -10   6    1.19    0.14 
  -2  10  -7    1.33    0.15 
   2  10   7    1.44    0.15 
   2 -10   7    1.37    0.15 
  -2 -10  -7    1.48    0.15 
  -2  10  -8   -0.04    0.07 
   2  10   8   -0.05    0.07 
   2 -10   8   -0.09    0.07 
  -2 -10  -8    0.09    0.08 
   2  10   9    1.63    0.17 
  -2  10  -9    1.29    0.15 
   2 -10   9    1.45    0.16 
  -2 -10  -9    1.64    0.18 
  -2  10 -10    1.41    0.16 
   2  10  10    2.08    0.19 
  -2 -10 -10    1.80    0.18 
   2 -10  10    1.77    0.18 
   2  10  11    0.23    0.11 
  -2 -11  11    1.22    0.16 
  -2 -11  10    0.05    0.10 
   2 -11  -9    0.14    0.09 
  -2 -11   9    0.12    0.09 
   2  11  -8    0.62    0.11 
  -2  11   8    0.71    0.12 
  -2 -11   8    0.69    0.12 
   2 -11  -8    0.71    0.12 
   2  11  -7    0.28    0.09 
  -2  11   7    0.26    0.10 
   2 -11  -7    0.26    0.10 
  -2 -11   7    0.35    0.11 
  -2  11   6    0.23    0.09 
   2  11  -6    0.19    0.08 
  -2 -11   6    0.07    0.09 
   2 -11  -6    0.21    0.09 
  -2  11   5    0.53    0.10 
   2  11  -5    0.39    0.09 
  -2 -11   5    0.36    0.10 
   2 -11  -5    0.44    0.10 
   2  11  -4    0.84    0.12 
   2  11  -4    0.73    0.11 
  -2  11   4    0.90    0.12 
   2 -11  -4    0.71    0.11 
  -2 -11   4    0.78    0.12 
   2  11  -3    4.68    0.22 
   2  11  -3    4.24    0.20 
  -2  11   3    4.62    0.23 
  -2 -11   3    4.16    0.21 
   2 -11  -3    4.59    0.22 
  -2  11   2    3.83    0.21 
   2  11  -2    3.67    0.20 
   2  11  -2    3.88    0.18 
  -2 -11   2    3.48    0.20 
   2 -11  -2    3.53    0.20 
   2  11  -1    0.12    0.07 
   2  11  -1    0.07    0.07 
  -2  11   1    0.18    0.08 
   2 -11  -1    0.13    0.08 
  -2 -11   1    0.12    0.08 
   2  11   0    2.01    0.16 
  -2  11   0    2.01    0.16 
   2  11   0    2.06    0.15 
   2 -11   0    1.77    0.16 
  -2 -11   0    1.92    0.15 
  -2  11  -1    1.15    0.13 
   2  11   1    1.37    0.15 
   2  11   1    1.04    0.11 
  -2 -11  -1    0.98    0.12 
   2 -11   1    1.12    0.13 
  -2  11  -2   -0.05    0.07 
   2  11   2    0.13    0.07 
   2  11   2    0.14    0.08 
  -2 -11  -2    0.05    0.07 
   2 -11   2   -0.03    0.07 
   2  11   3    0.41    0.10 
   2  11   3    0.36    0.09 
  -2  11  -3    0.32    0.09 
  -2 -11  -3    0.21    0.08 
   2 -11   3    0.42    0.10 
  -2  11  -4    4.36    0.22 
   2  11   4    4.15    0.20 
   2  11   4    3.98    0.22 
   2 -11   4    4.16    0.22 
  -2 -11  -4    4.21    0.21 
   2  11   5    1.66    0.15 
  -2  11  -5    1.79    0.16 
  -2 -11  -5    1.59    0.17 
   2 -11   5    1.60    0.17 
  -2  11  -6    0.10    0.08 
   2  11   6    0.24    0.08 
   2 -11   6    0.25    0.10 
  -2 -11  -6    0.08    0.09 
  -2  11  -7    0.05    0.08 
   2  11   7    0.21    0.08 
   2 -11   7    0.19    0.10 
  -2 -11  -7    0.12    0.09 
   2  11   8    0.71    0.12 
  -2  11  -8    0.50    0.12 
  -2 -11  -8    0.74    0.13 
   2 -11   8    0.53    0.12 
  -2  11  -9    2.27    0.20 
   2  11   9    1.87    0.19 
   2 -11   9    1.67    0.18 
  -2 -11  -9    1.99    0.20 
   2  11  10    0.13    0.11 
   2 -11  10   -0.21    0.08 
  -2 -11 -10    0.10    0.10 
  -2 -12   9    0.19    0.11 
   2  12  -8    0.68    0.12 
  -2 -12   8    0.72    0.14 
   2 -12  -8    0.81    0.14 
   2  12  -7    0.07    0.08 
  -2  12   7   -0.09    0.08 
   2 -12  -7   -0.06    0.08 
  -2 -12   7   -0.08    0.08 
  -2  12   6    0.01    0.08 
   2  12  -6    0.11    0.09 
   2 -12  -6    0.19    0.09 
  -2 -12   6   -0.06    0.08 
   2  12  -5    0.45    0.11 
  -2  12   5    0.50    0.11 
  -2 -12   5    0.52    0.12 
   2 -12  -5    0.44    0.11 
   2  12  -4   -0.08    0.07 
  -2  12   4   -0.08    0.07 
   2 -12  -4    0.19    0.09 
  -2 -12   4    0.04    0.08 
  -2  12   3    0.04    0.08 
   2  12  -3    0.05    0.08 
  -2 -12   3    0.07    0.09 
   2 -12  -3    0.07    0.08 
   2  12  -2    0.00    0.07 
  -2  12   2    0.09    0.09 
  -2 -12   2   -0.06    0.08 
   2 -12  -2    0.04    0.08 
  -2  12   1    0.32    0.10 
   2  12  -1    0.29    0.09 
   2 -12  -1    0.22    0.10 
  -2 -12   1    0.22    0.10 
  -2  12   0    2.87    0.20 
   2  12   0    2.85    0.19 
   2 -12   0    2.47    0.19 
  -2 -12   0    3.18    0.20 
   2  12   1    0.21    0.09 
  -2  12  -1    0.24    0.10 
  -2 -12  -1    0.18    0.08 
   2 -12   1    0.27    0.10 
   2  12   2    1.87    0.18 
  -2  12  -2    2.17    0.18 
  -2 -12  -2    1.85    0.17 
   2 -12   2    2.14    0.18 
   2  12   3    0.31    0.10 
  -2  12  -3    0.26    0.10 
  -2 -12  -3    0.14    0.09 
   2 -12   3    0.37    0.11 
   2  12   4    0.10    0.09 
  -2  12  -4    0.02    0.08 
   2  12   4    0.29    0.09 
  -2 -12  -4   -0.05    0.08 
   2 -12   4    0.09    0.09 
   2  12   5    0.05    0.08 
  -2  12  -5    0.13    0.09 
   2 -12   5    0.14    0.10 
  -2 -12  -5   -0.08    0.08 
   2  12   6   -0.04    0.07 
  -2  12  -6    0.16    0.10 
   2 -12   6    0.05    0.09 
  -2 -12  -6    0.21    0.10 
  -2  12  -7    0.57    0.12 
   2  12   7    0.81    0.13 
  -2 -12  -7    0.91    0.15 
   2 -12   7    0.98    0.14 
   2  12   8    0.95    0.14 
  -2  12  -8    1.20    0.16 
   2 -12   8    0.95    0.15 
  -2 -12  -8    0.97    0.15 
   2  12   9    0.42    0.12 
  -2  12  -9    0.30    0.12 
   2 -12   9    0.37    0.12 
  -2 -12  -9    0.37    0.12 
   2  13  -8    0.25    0.11 
   2 -13  -8    0.14    0.11 
   2  13  -7    0.85    0.15 
  -2  13   7    0.96    0.15 
  -2 -13   7    0.93    0.15 
  -2  13   6    0.06    0.10 
   2  13  -6    0.04    0.09 
   2 -13  -6    0.03    0.10 
  -2 -13   6    0.02    0.10 
   2  13  -5    0.22    0.10 
  -2  13   5    0.34    0.11 
   2 -13  -5    0.31    0.11 
  -2 -13   5    0.17    0.11 
   2  13  -4    0.10    0.09 
  -2  13   4    0.12    0.09 
  -2 -13   4    0.12    0.10 
   2 -13  -4    0.07    0.09 
   2  13  -3    0.32    0.10 
  -2  13   3    0.27    0.10 
  -2 -13   3    0.17    0.10 
   2 -13  -3    0.31    0.11 
   2  13  -2    0.14    0.09 
  -2  13   2    0.37    0.11 
   2 -13  -2    0.12    0.10 
  -2 -13   2    0.14    0.10 
  -2  13   1    0.32    0.11 
   2  13  -1    0.27    0.10 
  -2 -13   1    0.41    0.11 
   2 -13  -1    0.40    0.11 
  -2  13   0    0.20    0.10 
   2  13   0    0.22    0.10 
  -2 -13   0    0.23    0.10 
   2 -13   0    0.29    0.11 
   2  13   1   -0.02    0.08 
  -2  13  -1    0.07    0.09 
   2 -13   1    0.00    0.09 
  -2 -13  -1   -0.11    0.08 
  -2  13  -2    0.11    0.10 
   2  13   2    0.00    0.09 
  -2 -13  -2    0.06    0.09 
   2 -13   2    0.07    0.09 
   2  13   3    0.21    0.10 
  -2  13  -3    0.15    0.10 
   2 -13   3    0.17    0.10 
  -2 -13  -3    0.29    0.10 
  -2  13  -4    0.74    0.13 
   2  13   4    0.52    0.12 
   2 -13   4    0.45    0.13 
  -2  13  -5   -0.01    0.09 
   2 -13   5   -0.01    0.10 
  -2 -13  -5    0.08    0.10 
  -2  13  -6    0.12    0.09 
  -2 -13  -6   -0.01    0.10 
   2 -13   6    0.02    0.10 
  -2  13  -7    0.25    0.11 
  -2 -13  -7    0.28    0.12 
   2 -14  -6    0.00    0.11 
   2  14  -5    0.12    0.10 
  -2  14   5    0.13    0.11 
   2 -14  -5    0.28    0.11 
  -2  14   4    0.42    0.12 
   2  14  -4    0.75    0.13 
   2 -14  -4    0.51    0.13 
  -2  14   3    0.22    0.11 
   2  14  -3    0.22    0.11 
   2 -14  -3    0.25    0.11 
  -2 -14   3    0.26    0.11 
   2  14  -2    0.21    0.11 
  -2  14   2   -0.10    0.09 
   2 -14  -2    0.05    0.10 
  -2 -14   2    0.11    0.11 
   2  14  -1    0.20    0.10 
  -2  14   1    0.36    0.11 
  -2 -14   1    0.22    0.12 
   2 -14  -1    0.56    0.13 
   2  14   0   -0.10    0.08 
  -2  14   0   -0.14    0.09 
   2 -14   0   -0.03    0.10 
  -2 -14   0    0.08    0.10 
  -2  14  -1    0.07    0.09 
   2  14   1    0.22    0.10 
  -2 -14  -1   -0.04    0.10 
   2 -14   1    0.25    0.12 
  -2  14  -2    0.15    0.11 
   2  14   2    0.19    0.10 
   2 -14   2    0.05    0.10 
  -2 -14  -2   -0.06    0.10 
  -2  14  -3   -0.03    0.11 
   2  14   3    0.01    0.12 
  -2 -14  -3    0.05    0.10 
  -3   0  16    0.46    0.12 
   3   0 -16    0.34    0.13 
  -3   0  15    0.07    0.08 
   3   0 -15   -0.07    0.09 
   3   0 -14    0.19    0.10 
  -3   0  14    0.24    0.09 
  -3   0  13   -0.01    0.07 
   3   0 -13   -0.06    0.09 
  -3   0  12   17.78    0.46 
   3   0 -12   17.50    0.46 
  -3   0  11    0.00    0.04 
  -3   0  11    0.00    0.06 
   3   0 -11    0.13    0.08 
  -3   0  10    1.29    0.12 
  -3   0  10    1.66    0.10 
   3   0 -10    1.49    0.14 
  -3   0   9    0.01    0.05 
  -3   0   9    0.00    0.03 
   3   0  -9   -0.01    0.06 
   3   0  -8    9.10    0.25 
   3   0  -8    9.16    0.18 
  -3   0   8    9.30    0.22 
  -3   0   8    8.92    0.25 
   3   0  -7   -0.03    0.04 
  -3   0   7    0.02    0.04 
  -3   0   7    0.04    0.03 
   3   0  -7    0.00    0.02 
  -3   0   6    2.99    0.12 
  -3   0   6    2.92    0.10 
   3   0  -6    2.89    0.12 
  -3   0   5   -0.03    0.02 
   3   0  -5   -0.03    0.04 
  -3   0   5   -0.02    0.03 
   3   0  -4    7.13    0.17 
  -3   0   4    7.28    0.17 
  -3   0   4    7.19    0.16 
   3   0  -3   -0.11    0.03 
  -3   0   3   -0.02    0.03 
  -3   0   3   -0.01    0.02 
   3   0  -2    0.02    0.02 
  -3   0   2    0.00    0.02 
  -3   0   2    0.00    0.01 
   3   0  -2    0.00    0.02 
   3   0  -1   -0.01    0.02 
  -3   0   1   -0.03    0.02 
   3   0  -1   -0.02    0.02 
  -3   0   1   -0.01    0.02 
   3   0   0   70.81    1.18 
  -3   0   0   70.27    1.12 
   3   0   0   70.53    1.16 
  -3   0   0   70.25    1.15 
   3   0   1   -0.11    0.02 
  -3   0  -1   -0.13    0.03 
  -3   0  -1   -0.13    0.01 
   3   0   1   -0.13    0.02 
   3   0   2  990.83   16.46 
   3   0   2  996.13   15.99 
  -3   0  -2 1000.00   16.14 
   3   0   3    0.14    0.03 
  -3   0  -3    0.12    0.04 
   3   0   3    0.10    0.04 
   3   0   4   16.15    0.33 
   3   0   4   16.37    0.34 
  -3   0  -4   16.16    0.33 
   3   0   4   16.23    0.27 
  -3   0  -5    0.04    0.04 
  -3   0  -5    0.01    0.04 
   3   0   5    0.03    0.03 
   3   0   5    0.02    0.02 
  -3   0  -6    2.23    0.11 
  -3   0  -6    2.15    0.11 
   3   0   6    2.18    0.11 
   3   0   6    2.25    0.06 
   3   0   7   -0.05    0.04 
  -3   0  -7   -0.01    0.05 
  -3   0  -7    0.03    0.04 
   3   0   8    0.50    0.08 
  -3   0  -8    0.58    0.08 
  -3   0  -8    0.62    0.09 
   3   0   9    0.01    0.05 
  -3   0  -9   -0.08    0.06 
  -3   0  -9   -0.02    0.05 
  -3   0 -10    4.61    0.18 
   3   0  10    4.22    0.19 
  -3   0 -10    4.32    0.21 
   3   0  11   -0.03    0.05 
  -3   0 -11    0.03    0.06 
  -3   0 -11   -0.04    0.07 
  -3   0 -12   11.72    0.36 
   3   0  12   10.67    0.35 
   3   0  13   -0.06    0.06 
  -3   0 -13    0.07    0.10 
   3   0  14    0.56    0.12 
  -3   0 -14    0.45    0.12 
  -3   0 -15    0.11    0.11 
   3   0  15    0.07    0.09 
   3   1 -16    0.28    0.13 
  -3   1  16    0.12    0.09 
   3  -1 -16    0.02    0.11 
  -3  -1  16    0.16    0.09 
   3   1 -15    0.13    0.11 
  -3   1  15    0.10    0.08 
  -3  -1  15    0.00    0.08 
   3  -1 -15   -0.04    0.10 
  -3   1  14    1.87    0.17 
   3   1 -14    2.51    0.20 
   3  -1 -14    2.12    0.20 
  -3  -1  14    1.89    0.17 
  -3   1  13   21.24    0.54 
   3   1 -13   20.39    0.53 
  -3  -1  13   21.18    0.53 
   3  -1 -13   21.30    0.54 
   3   1 -12    6.94    0.27 
  -3   1  12    7.11    0.26 
   3  -1 -12    7.08    0.27 
  -3  -1  12    7.31    0.26 
  -3   1  11    5.89    0.18 
  -3   1  11    5.41    0.22 
   3   1 -11    5.81    0.24 
  -3  -1  11    5.53    0.18 
   3  -1 -11    5.44    0.23 
  -3  -1  11    5.48    0.22 
  -3   1  10    3.10    0.16 
   3   1 -10    3.05    0.18 
  -3   1  10    3.45    0.13 
   3  -1 -10    3.62    0.18 
  -3  -1  10    3.68    0.17 
  -3  -1  10    3.28    0.14 
  -3   1   9    0.25    0.05 
  -3   1   9    0.45    0.07 
   3   1  -9    0.43    0.08 
  -3  -1   9    0.30    0.07 
   3  -1  -9    0.39    0.08 
  -3  -1   9    0.41    0.06 
  -3   1   8    2.93    0.14 
   3   1  -8    2.91    0.08 
   3   1  -8    2.79    0.14 
  -3   1   8    2.92    0.11 
   3  -1  -8    2.97    0.09 
  -3  -1   8    2.95    0.13 
  -3  -1   8    3.08    0.12 
   3  -1  -8    2.90    0.14 
  -3   1   7    4.04    0.15 
  -3   1   7    4.20    0.13 
   3   1  -7    3.95    0.09 
   3   1  -7    3.93    0.15 
  -3  -1   7    3.72    0.13 
   3  -1  -7    4.34    0.10 
  -3  -1   7    3.95    0.14 
   3  -1  -7    4.23    0.15 
   3   1  -6   32.68    0.62 
  -3   1   6   33.18    0.59 
  -3   1   6   33.65    0.64 
   3   1  -6   34.38    0.56 
  -3  -1   6   33.23    0.60 
   3  -1  -6   34.35    0.56 
   3  -1  -6   33.30    0.62 
  -3  -1   6   33.44    0.63 
  -3   1   5   10.68    0.22 
   3   1  -5   10.51    0.24 
  -3   1   5   10.44    0.24 
   3   1  -5   10.26    0.18 
   3  -1  -5   10.44    0.23 
   3  -1  -5   10.64    0.19 
  -3  -1   5   10.36    0.23 
  -3  -1   5    9.98    0.22 
  -3   1   4    0.22    0.02 
   3   1  -4    0.30    0.05 
  -3   1   4    0.20    0.03 
  -3   1   4    0.19    0.04 
   3   1  -4    0.27    0.02 
  -3  -1   4    0.25    0.04 
   3  -1  -4    0.27    0.04 
  -3  -1   4    0.28    0.04 
  -3   1   3   11.44    0.24 
   3   1  -3   11.80    0.20 
   3   1  -3   11.64    0.24 
  -3   1   3   11.46    0.20 
  -3  -1   3   11.60    0.23 
  -3  -1   3   11.64    0.23 
   3  -1  -3   11.50    0.23 
  -3   1   2    2.62    0.08 
  -3   1   2    2.94    0.07 
   3   1  -2    2.63    0.09 
  -3  -1   2    2.69    0.07 
   3  -1  -2    2.75    0.07 
   3  -1  -2    2.64    0.09 
  -3  -1   2    2.68    0.08 
  -3  -1   2    2.72    0.07 
   3   1  -1  113.63    1.92 
  -3   1   1  115.13    1.91 
   3   1  -1  116.67    1.91 
  -3   1   1  117.29    1.90 
   3  -1  -1  112.76    1.95 
  -3  -1   1  119.15    1.88 
   3  -1  -1  116.93    1.86 
  -3  -1   1  114.04    1.90 
   3   1   0   40.21    0.68 
   3   1   0   39.96    0.68 
  -3   1   0   40.12    0.68 
  -3   1   0   41.72    0.66 
  -3  -1   0   40.61    0.66 
  -3  -1   0   40.20    0.68 
   3  -1   0   40.05    0.70 
   3  -1   0   40.68    0.65 
   3   1   1    2.35    0.08 
   3   1   1    2.33    0.07 
  -3   1  -1    2.41    0.07 
   3  -1   1    2.41    0.06 
  -3  -1  -1    2.27    0.05 
  -3  -1  -1    2.30    0.08 
   3   1   2   43.16    0.75 
   3   1   2   42.15    0.73 
  -3   1  -2   42.89    0.74 
  -3  -1  -2   42.08    0.73 
   3  -1   2   44.24    0.70 
   3  -1   2   42.68    0.71 
  -3   1  -3    1.72    0.09 
   3   1   3    1.58    0.08 
   3   1   3    1.37    0.07 
  -3   1  -3    1.49    0.07 
   3  -1   3    1.72    0.08 
   3  -1   3    1.74    0.06 
  -3  -1  -3    1.56    0.08 
  -3   1  -4   17.32    0.33 
   3   1   4   16.76    0.35 
   3   1   4   16.55    0.34 
  -3   1  -4   16.29    0.34 
   3  -1   4   16.73    0.35 
  -3  -1  -4   16.59    0.34 
   3  -1   4   17.23    0.30 
   3   1   5    2.03    0.10 
  -3   1  -5    2.13    0.10 
   3   1   5    2.33    0.11 
  -3   1  -5    1.90    0.10 
  -3  -1  -5    2.19    0.10 
   3  -1   5    2.09    0.10 
   3  -1   5    1.97    0.07 
  -3   1  -6    1.36    0.10 
  -3   1  -6    1.34    0.09 
   3   1   6    1.21    0.09 
   3   1   6    1.08    0.08 
   3  -1   6    1.24    0.06 
   3  -1   6    1.33    0.09 
  -3  -1  -6    1.26    0.09 
  -3   1  -7    4.72    0.16 
  -3   1  -7    4.20    0.16 
   3   1   7    4.11    0.16 
  -3  -1  -7    4.19    0.16 
  -3  -1  -7    4.19    0.17 
   3  -1   7    4.45    0.17 
   3  -1   7    4.46    0.11 
  -3   1  -8    1.89    0.14 
  -3   1  -8    1.90    0.12 
   3   1   8    1.85    0.12 
  -3  -1  -8    1.65    0.14 
   3  -1   8    1.91    0.12 
  -3  -1  -8    1.69    0.12 
  -3   1  -9    0.02    0.05 
   3   1   9   -0.02    0.05 
  -3   1  -9    0.06    0.07 
   3  -1   9    0.02    0.05 
  -3  -1  -9    0.02    0.07 
  -3  -1  -9    0.02    0.06 
  -3   1 -10    1.30    0.14 
   3   1  10    1.29    0.12 
  -3   1 -10    1.32    0.12 
   3  -1  10    1.24    0.12 
  -3  -1 -10    1.23    0.12 
  -3  -1 -10    1.05    0.12 
  -3   1 -11    0.24    0.09 
  -3   1 -11    0.33    0.08 
   3   1  11    0.23    0.08 
  -3  -1 -11    0.44    0.08 
   3  -1  11    0.35    0.08 
  -3  -1 -11    0.48    0.10 
  -3   1 -12    0.06    0.09 
   3   1  12    0.16    0.08 
   3  -1  12    0.09    0.07 
  -3  -1 -12    0.05    0.09 
   3   1  13    3.32    0.20 
  -3   1 -13    3.07    0.22 
   3  -1  13    3.32    0.21 
  -3  -1 -13    3.40    0.23 
  -3   1 -14    0.20    0.11 
   3   1  14    0.26    0.09 
   3  -1  14    0.31    0.09 
  -3  -1 -14    0.42    0.12 
   3   1  15    2.89    0.22 
  -3   1 -15    2.59    0.24 
   3  -1  15    2.49    0.20 
  -3  -1 -15    3.26    0.25 
  -3   2  16    0.55    0.13 
   3   2 -16    0.48    0.15 
  -3  -2  16    0.58    0.12 
   3  -2 -16    0.79    0.15 
   3   2 -15    0.26    0.12 
  -3   2  15    0.32    0.10 
  -3  -2  15    0.26    0.09 
   3  -2 -15    0.15    0.11 
  -3   2  14    0.05    0.07 
   3   2 -14    0.25    0.11 
  -3  -2  14    0.10    0.07 
   3  -2 -14    0.14    0.09 
  -3   2  13    0.13    0.08 
   3   2 -13    0.12    0.10 
   3  -2 -13    0.19    0.09 
  -3  -2  13    0.17    0.08 
   3   2 -12    9.11    0.33 
  -3   2  12    9.87    0.32 
   3  -2 -12   10.13    0.32 
  -3  -2  12    9.50    0.27 
  -3  -2  12    9.58    0.31 
  -3   2  11    6.93    0.25 
   3   2 -11    6.44    0.26 
  -3  -2  11    6.42    0.21 
   3  -2 -11    6.52    0.25 
  -3  -2  11    6.77    0.24 
  -3   2  10    5.51    0.17 
  -3   2  10    5.20    0.21 
   3   2 -10    5.22    0.22 
  -3  -2  10    5.19    0.18 
  -3  -2  10    5.24    0.20 
   3  -2 -10    5.35    0.22 
   3   2  -9    0.08    0.07 
  -3   2   9   -0.04    0.05 
  -3   2   9    0.03    0.04 
   3  -2  -9    0.00    0.06 
  -3  -2   9    0.00    0.04 
  -3  -2   9    0.02    0.04 
  -3   2   8    6.45    0.21 
  -3   2   8    6.71    0.18 
   3   2  -8    6.57    0.22 
   3   2  -8    6.69    0.15 
  -3  -2   8    6.54    0.20 
   3  -2  -8    6.32    0.21 
  -3  -2   8    6.71    0.19 
   3  -2  -8    6.37    0.15 
  -3   2   7    2.60    0.12 
   3   2  -7    2.78    0.14 
   3   2  -7    2.93    0.09 
  -3   2   7    2.84    0.11 
   3  -2  -7    2.91    0.09 
  -3  -2   7    2.70    0.11 
   3  -2  -7    2.69    0.13 
  -3  -2   7    2.91    0.12 
  -3   2   6   22.11    0.42 
   3   2  -6   22.38    0.45 
   3   2  -6   22.91    0.40 
  -3   2   6   21.80    0.46 
  -3  -2   6   22.65    0.44 
  -3  -2   6   22.65    0.43 
   3  -2  -6   23.03    0.40 
   3  -2  -6   22.55    0.44 
   3   2  -5   51.62    0.84 
   3   2  -5   50.48    0.89 
  -3   2   5   50.44    0.91 
  -3   2   5   50.93    0.84 
  -3   2   5   50.17    0.86 
   3  -2  -5   50.03    0.87 
  -3  -2   5   51.57    0.89 
  -3  -2   5   50.43    0.87 
  -3   2   4    1.68    0.08 
  -3   2   4    1.77    0.06 
   3   2  -4    1.90    0.06 
  -3   2   4    1.75    0.08 
  -3  -2   4    1.81    0.07 
   3  -2  -4    1.90    0.08 
  -3  -2   4    1.93    0.08 
   3   2  -3    0.20    0.04 
  -3   2   3    0.46    0.04 
   3   2  -3    0.39    0.04 
  -3   2   3    0.39    0.04 
  -3   2   3    0.37    0.04 
  -3  -2   3    0.31    0.04 
   3  -2  -3    0.29    0.04 
  -3  -2   3    0.37    0.04 
   3   2  -2    0.58    0.04 
  -3   2   2    0.60    0.05 
  -3   2   2    0.62    0.05 
   3   2  -2    0.69    0.06 
  -3  -2   2    0.74    0.04 
  -3  -2   2    0.67    0.05 
   3  -2  -2    0.59    0.04 
   3  -2  -2    0.65    0.06 
   3   2  -1   21.79    0.39 
  -3   2   1   22.05    0.39 
   3   2  -1   22.34    0.37 
   3   2  -1   21.99    0.40 
  -3   2   1   21.44    0.39 
   3  -2  -1   21.88    0.40 
   3  -2  -1   21.53    0.36 
  -3  -2   1   22.09    0.38 
   3   2   0   65.12    1.05 
  -3   2   0   62.61    1.05 
   3   2   0   62.35    1.05 
  -3  -2   0   64.33    1.02 
  -3  -2   0   62.26    1.05 
   3  -2   0   63.20    1.08 
  -3   2  -1    4.10    0.09 
  -3   2  -1    4.10    0.11 
   3   2   1    4.25    0.10 
   3   2   1    4.29    0.12 
   3  -2   1    4.20    0.12 
  -3  -2  -1    4.11    0.09 
  -3   2  -2    5.40    0.15 
   3   2   2    5.32    0.14 
   3   2   2    5.38    0.13 
  -3   2  -2    5.52    0.12 
  -3  -2  -2    5.17    0.14 
  -3  -2  -2    5.27    0.11 
   3  -2   2    5.32    0.14 
   3  -2   2    5.69    0.13 
   3   2   3   14.25    0.30 
  -3   2  -3   14.25    0.28 
   3   2   3   14.30    0.29 
  -3   2  -3   14.38    0.30 
   3  -2   3   14.43    0.27 
  -3  -2  -3   14.61    0.30 
   3  -2   3   14.48    0.30 
  -3  -2  -3   14.68    0.24 
  -3   2  -4    8.20    0.21 
   3   2   4    8.39    0.21 
   3   2   4    7.99    0.20 
  -3   2  -4    8.27    0.19 
   3  -2   4    8.29    0.18 
   3  -2   4    8.21    0.21 
  -3  -2  -4    8.32    0.20 
  -3   2  -5    1.69    0.09 
   3   2   5    1.72    0.10 
  -3   2  -5    1.83    0.10 
   3   2   5    1.80    0.10 
  -3  -2  -5    1.65    0.09 
   3  -2   5    1.83    0.07 
   3  -2   5    1.92    0.10 
   3   2   6    2.89    0.13 
   3   2   6    2.84    0.13 
  -3   2  -6    3.00    0.13 
  -3   2  -6    3.03    0.13 
   3  -2   6    2.70    0.13 
  -3  -2  -6    2.98    0.12 
   3  -2   6    2.90    0.10 
   3   2   7    9.80    0.27 
   3   2   7   10.02    0.27 
  -3   2  -7   10.11    0.27 
  -3   2  -7    9.93    0.26 
   3  -2   7    9.79    0.27 
  -3  -2  -7    9.95    0.25 
   3  -2   7   10.07    0.22 
   3   2   8    0.02    0.05 
  -3   2  -8    0.06    0.07 
  -3   2  -8   -0.01    0.05 
   3  -2   8    0.03    0.05 
  -3  -2  -8    0.05    0.06 
  -3  -2  -8    0.14    0.06 
   3   2   9    1.51    0.13 
  -3   2  -9    1.67    0.12 
  -3   2  -9    1.52    0.14 
   3  -2   9    1.41    0.12 
  -3  -2  -9    1.61    0.15 
  -3  -2  -9    1.50    0.12 
   3   2  10    0.79    0.10 
  -3   2 -10    0.79    0.10 
  -3   2 -10    0.86    0.11 
  -3  -2 -10    0.84    0.12 
   3  -2  10    0.83    0.10 
  -3  -2 -10    1.05    0.10 
  -3   2 -11   -0.04    0.08 
   3   2  11    0.04    0.06 
  -3  -2 -11    0.03    0.08 
  -3  -2 -11   -0.11    0.06 
   3  -2  11    0.08    0.06 
   3   2  12    0.32    0.10 
  -3   2 -12    0.43    0.11 
  -3  -2 -12    0.16    0.09 
   3  -2  12    0.28    0.08 
  -3   2 -13    0.06    0.09 
   3   2  13    0.13    0.08 
   3  -2  13   -0.04    0.07 
  -3  -2 -13    0.15    0.10 
  -3   2 -14    0.13    0.11 
   3   2  14    0.20    0.10 
  -3  -2 -14    0.28    0.11 
   3  -2  14    0.13    0.09 
   3   2  15    0.09    0.09 
  -3   2 -15    0.36    0.13 
   3  -2  15    0.26    0.10 
  -3  -2 -15    0.15    0.12 
  -3   3  16   -0.09    0.08 
   3   3 -16   -0.05    0.12 
   3  -3 -16    0.11    0.12 
  -3  -3  16   -0.01    0.08 
   3   3 -15    1.04    0.16 
  -3   3  15    0.68    0.13 
   3  -3 -15    0.84    0.15 
  -3  -3  15    1.07    0.14 
   3   3 -14    1.33    0.17 
  -3   3  14    1.61    0.16 
  -3  -3  14    1.45    0.15 
   3  -3 -14    1.03    0.15 
   3   3 -13    2.92    0.21 
  -3   3  13    3.10    0.19 
  -3  -3  13    2.72    0.17 
   3  -3 -13    2.61    0.19 
  -3   3  12    3.29    0.19 
   3   3 -12    3.36    0.21 
   3  -3 -12    3.34    0.20 
  -3  -3  12    2.88    0.15 
  -3  -3  12    3.23    0.18 
   3   3 -11    1.22    0.14 
  -3   3  11    1.27    0.13 
  -3  -3  11    1.11    0.11 
  -3  -3  11    1.39    0.12 
   3  -3 -11    1.13    0.13 
   3   3 -10    0.21    0.09 
  -3   3  10    0.15    0.06 
  -3   3  10    0.16    0.05 
  -3  -3  10    0.12    0.06 
   3  -3 -10   -0.03    0.07 
  -3  -3  10    0.17    0.06 
  -3   3   9    0.15    0.06 
  -3   3   9    0.15    0.05 
   3   3  -9    0.15    0.08 
   3  -3  -9    0.20    0.07 
  -3  -3   9    0.17    0.05 
  -3  -3   9    0.18    0.05 
  -3   3   8    2.90    0.12 
   3   3  -8    3.19    0.10 
   3   3  -8    2.87    0.16 
   3  -3  -8    2.89    0.15 
   3  -3  -8    2.92    0.10 
  -3  -3   8    3.05    0.13 
  -3  -3   8    3.08    0.13 
  -3   3   7    0.04    0.03 
   3   3  -7    0.08    0.03 
  -3   3   7    0.05    0.04 
   3   3  -7    0.06    0.06 
   3  -3  -7    0.10    0.03 
  -3  -3   7    0.08    0.04 
   3  -3  -7    0.04    0.05 
  -3  -3   7    0.05    0.04 
   3   3  -6    4.16    0.11 
  -3   3   6    3.40    0.12 
  -3   3   6    3.46    0.11 
  -3   3   6    3.25    0.14 
  -3  -3   6    4.25    0.13 
   3  -3  -6    3.31    0.13 
  -3  -3   6    4.00    0.13 
  -3   3   5   41.09    0.70 
  -3   3   5   40.59    0.71 
  -3   3   5   39.94    0.74 
   3   3  -5   39.34    0.73 
   3   3  -5   41.04    0.69 
  -3  -3   5   41.11    0.72 
  -3  -3   5   40.51    0.71 
   3  -3  -5   39.19    0.71 
  -3   3   4    0.08    0.03 
  -3   3   4    0.10    0.03 
  -3   3   4    0.10    0.04 
   3   3  -4    0.04    0.03 
   3   3  -4    0.10    0.04 
  -3  -3   4    0.05    0.03 
   3  -3  -4    0.11    0.03 
  -3  -3   4    0.05    0.03 
   3   3  -3    0.67    0.07 
   3   3  -3    0.70    0.05 
  -3   3   3    0.77    0.06 
  -3   3   3    0.79    0.07 
  -3   3   3    0.74    0.05 
  -3  -3   3    0.76    0.06 
  -3  -3   3    0.79    0.04 
  -3   3   2    2.91    0.10 
  -3   3   2    2.86    0.08 
  -3   3   2    2.93    0.10 
   3   3  -2    2.94    0.09 
   3   3  -2    2.82    0.11 
  -3  -3   2    2.92    0.10 
   3  -3  -2    2.88    0.10 
   3   3  -1   18.00    0.34 
  -3   3   1   17.63    0.34 
   3   3  -1   18.19    0.35 
  -3   3   1   17.69    0.34 
  -3   3   1   18.14    0.30 
  -3  -3   1   18.53    0.34 
   3  -3  -1   17.36    0.35 
   3   3   0    4.35    0.12 
   3   3   0    4.25    0.12 
   3   3   0    4.18    0.09 
  -3   3   0    4.15    0.08 
  -3   3   0    4.23    0.12 
  -3   3   0    4.14    0.13 
  -3  -3   0    4.29    0.11 
   3  -3   0    4.15    0.12 
   3   3   1   12.25    0.26 
  -3   3  -1   12.28    0.26 
  -3   3  -1   12.53    0.22 
   3   3   1   12.78    0.24 
   3  -3   1   12.41    0.26 
   3  -3   1   12.30    0.25 
  -3  -3  -1   12.72    0.24 
  -3  -3  -1   12.24    0.26 
   3   3   2    1.73    0.09 
  -3   3  -2    1.93    0.09 
   3   3   2    1.92    0.07 
  -3   3  -2    1.78    0.07 
   3  -3   2    1.85    0.08 
   3  -3   2    1.80    0.08 
  -3  -3  -2    1.93    0.09 
  -3  -3  -2    1.81    0.07 
   3   3   3    1.61    0.08 
  -3   3  -3    1.50    0.07 
   3   3   3    1.43    0.07 
  -3   3  -3    1.47    0.08 
   3  -3   3    1.51    0.08 
  -3  -3  -3    1.41    0.06 
  -3  -3  -3    1.34    0.08 
   3  -3   3    1.42    0.08 
  -3   3  -4    2.25    0.11 
   3   3   4    2.30    0.10 
   3   3   4    2.34    0.10 
  -3   3  -4    2.27    0.10 
  -3  -3  -4    2.35    0.11 
   3  -3   4    2.32    0.11 
   3  -3   4    2.39    0.09 
  -3  -3  -4    2.35    0.07 
  -3   3  -5    5.06    0.16 
  -3   3  -5    4.67    0.15 
   3   3   5    4.81    0.16 
   3   3   5    4.84    0.16 
  -3  -3  -5    4.86    0.11 
   3  -3   5    5.02    0.14 
  -3  -3  -5    4.78    0.16 
   3  -3   5    4.94    0.16 
   3   3   6    9.89    0.26 
  -3   3  -6    9.57    0.25 
   3   3   6    9.44    0.25 
  -3   3  -6    9.31    0.24 
   3  -3   6    9.59    0.26 
  -3  -3  -6    9.40    0.25 
  -3  -3  -6    9.87    0.18 
   3  -3   6    9.23    0.22 
   3   3   7    7.95    0.24 
  -3   3  -7    7.94    0.23 
   3   3   7    7.73    0.24 
  -3   3  -7    8.06    0.23 
   3  -3   7    8.05    0.20 
  -3  -3  -7    8.08    0.23 
   3  -3   7    8.11    0.24 
  -3   3  -8    2.94    0.15 
   3   3   8    2.99    0.15 
   3   3   8    2.66    0.15 
  -3   3  -8    3.05    0.16 
  -3  -3  -8    2.86    0.14 
   3  -3   8    2.88    0.15 
   3  -3   8    3.14    0.12 
  -3   3  -9    0.23    0.08 
   3   3   9    0.13    0.07 
  -3   3  -9    0.26    0.07 
  -3  -3  -9    0.13    0.06 
   3  -3   9    0.20    0.07 
  -3  -3  -9    0.16    0.08 
   3   3  10   -0.04    0.06 
  -3   3 -10   -0.01    0.07 
  -3   3 -10    0.08    0.06 
  -3  -3 -10    0.07    0.06 
   3  -3  10    0.09    0.06 
  -3  -3 -10    0.01    0.07 
  -3   3 -11    0.58    0.11 
   3   3  11    0.78    0.11 
   3  -3  11    0.58    0.10 
  -3  -3 -11    0.65    0.10 
  -3  -3 -11    0.63    0.11 
   3   3  12    0.12    0.07 
  -3   3 -12   -0.01    0.09 
   3  -3  12    0.02    0.07 
  -3  -3 -12    0.09    0.09 
   3   3  13    2.00    0.17 
  -3   3 -13    1.74    0.19 
  -3  -3 -13    1.98    0.20 
   3  -3  13    1.52    0.16 
   3   3  14    5.47    0.27 
  -3   3 -14    6.46    0.30 
   3  -3  14    6.05    0.29 
  -3  -3 -14    6.08    0.30 
  -3   3 -15    0.89    0.16 
   3   3  15    0.67    0.14 
  -3  -3 -15    0.77    0.15 
   3  -3  15    0.96    0.15 
   3   4 -16    0.49    0.15 
  -3   4  16    0.35    0.12 
   3  -4 -16    0.40    0.13 
  -3  -4  16    0.62    0.13 
   3   4 -15    1.01    0.17 
  -3   4  15    0.94    0.15 
   3  -4 -15    1.30    0.16 
  -3  -4  15    0.96    0.13 
  -3   4  14    1.50    0.16 
   3   4 -14    1.85    0.20 
   3  -4 -14    1.49    0.17 
  -3  -4  14    1.64    0.15 
   3   4 -13    1.03    0.15 
  -3   4  13    0.79    0.12 
  -3  -4  13    1.12    0.13 
   3  -4 -13    1.25    0.14 
  -3   4  12    0.31    0.08 
   3   4 -12    0.25    0.10 
   3  -4 -12    0.32    0.10 
  -3  -4  12    0.26    0.07 
  -3  -4  12    0.37    0.08 
   3   4 -11    3.86    0.22 
  -3   4  11    3.96    0.20 
   3  -4 -11    3.77    0.20 
  -3  -4  11    3.73    0.18 
  -3  -4  11    3.70    0.17 
   3   4 -10    1.34    0.15 
  -3   4  10    1.20    0.10 
  -3   4  10    1.28    0.13 
  -3  -4  10    1.49    0.11 
  -3  -4  10    1.62    0.12 
   3  -4 -10    1.38    0.14 
   3   4  -9    4.91    0.22 
  -3   4   9    4.34    0.19 
  -3   4   9    4.97    0.17 
  -3  -4   9    5.03    0.18 
  -3  -4   9    4.48    0.17 
   3  -4  -9    4.92    0.20 
  -3   4   8    3.04    0.13 
   3   4  -8    3.26    0.12 
  -3   4   8    2.83    0.15 
   3   4  -8    2.79    0.17 
   3  -4  -8    3.14    0.16 
  -3  -4   8    2.86    0.13 
  -3  -4   8    2.98    0.13 
   3  -4  -8    3.01    0.12 
   3   4  -7    1.13    0.07 
  -3   4   7    1.27    0.08 
  -3   4   7    1.16    0.10 
   3   4  -7    1.20    0.12 
  -3  -4   7    1.14    0.10 
   3  -4  -7    1.19    0.08 
   3  -4  -7    1.16    0.11 
  -3  -4   7    1.21    0.08 
   3   4  -6    0.35    0.07 
  -3   4   6    0.38    0.05 
   3   4  -6    0.38    0.05 
  -3   4   6    0.43    0.05 
  -3   4   6    0.37    0.06 
  -3  -4   6    0.34    0.06 
  -3  -4   6    0.29    0.04 
   3  -4  -6    0.34    0.06 
  -3   4   5    5.73    0.16 
  -3   4   5    5.80    0.18 
   3   4  -5    5.84    0.16 
  -3   4   5    6.07    0.16 
   3   4  -5    5.87    0.19 
  -3  -4   5    6.06    0.15 
   3  -4  -5    6.10    0.17 
  -3  -4   5    6.10    0.18 
  -3   4   4   42.31    0.74 
  -3   4   4   41.36    0.73 
   3   4  -4   41.35    0.76 
   3   4  -4   41.73    0.73 
  -3   4   4   41.26    0.72 
  -3   4   4   41.06    0.76 
  -3  -4   4   41.53    0.74 
  -3  -4   4   43.57    0.72 
  -3   4   3    6.19    0.16 
   3   4  -3    6.25    0.18 
   3   4  -3    6.09    0.16 
  -3   4   3    6.08    0.16 
  -3   4   3    6.19    0.15 
  -3  -4   3    6.32    0.13 
   3  -4  -3    5.96    0.17 
  -3  -4   3    6.31    0.17 
   3   4  -2   10.31    0.24 
  -3   4   2   10.49    0.23 
  -3   4   2   10.96    0.21 
   3   4  -2   10.22    0.23 
  -3   4   2   10.35    0.23 
  -3  -4   2   10.46    0.24 
   3  -4  -2   10.67    0.24 
  -3   4   1    0.01    0.02 
   3   4  -1    0.02    0.03 
  -3   4   1    0.03    0.03 
  -3   4   1    0.01    0.03 
   3   4  -1    0.05    0.04 
  -3  -4   1    0.06    0.03 
   3  -4  -1    0.00    0.03 
   3   4   0    8.58    0.21 
  -3   4   0    8.30    0.20 
  -3   4   0    8.40    0.20 
  -3   4   0    8.78    0.16 
   3   4   0    8.33    0.20 
  -3  -4   0    8.34    0.19 
   3  -4   0    8.53    0.20 
   3   4   1   13.64    0.29 
  -3   4  -1   13.32    0.30 
   3   4   1   14.13    0.30 
   3   4   1   14.23    0.26 
  -3   4  -1   14.37    0.25 
   3  -4   1   13.90    0.29 
  -3  -4  -1   14.30    0.28 
   3  -4   1   14.01    0.29 
   3   4   2    0.19    0.04 
  -3   4  -2    0.18    0.03 
   3   4   2    0.17    0.03 
  -3   4  -2    0.30    0.05 
   3  -4   2    0.15    0.04 
   3  -4   2    0.23    0.04 
  -3  -4  -2    0.20    0.04 
  -3  -4  -2    0.21    0.04 
   3   4   3    4.13    0.14 
   3   4   3    4.25    0.12 
  -3   4  -3    3.93    0.14 
  -3   4  -3    4.33    0.12 
  -3  -4  -3    4.26    0.15 
   3  -4   3    4.04    0.13 
  -3  -4  -3    4.27    0.11 
   3  -4   3    4.20    0.14 
  -3   4  -4   16.80    0.34 
  -3   4  -4   16.78    0.36 
   3   4   4   16.26    0.36 
   3   4   4   16.76    0.35 
  -3  -4  -4   17.07    0.31 
  -3  -4  -4   16.75    0.36 
   3  -4   4   16.96    0.34 
   3  -4   4   17.09    0.36 
   3   4   5    0.15    0.05 
  -3   4  -5    0.25    0.06 
   3   4   5    0.26    0.05 
  -3   4  -5    0.26    0.05 
  -3  -4  -5    0.26    0.06 
   3  -4   5    0.21    0.05 
  -3  -4  -5    0.23    0.03 
   3  -4   5    0.33    0.05 
  -3   4  -6    0.30    0.07 
   3   4   6    0.32    0.06 
  -3   4  -6    0.25    0.06 
   3   4   6    0.27    0.06 
   3  -4   6    0.23    0.05 
  -3  -4  -6    0.26    0.06 
   3  -4   6    0.31    0.06 
  -3  -4  -6    0.37    0.04 
   3   4   7    1.62    0.12 
  -3   4  -7    1.30    0.12 
  -3   4  -7    1.38    0.11 
   3   4   7    1.47    0.11 
   3  -4   7    1.48    0.11 
  -3  -4  -7    1.68    0.12 
   3  -4   7    1.71    0.10 
   3   4   8    0.66    0.09 
  -3   4  -8    0.62    0.09 
  -3   4  -8    0.63    0.09 
   3   4   8    0.79    0.09 
   3  -4   8    0.66    0.09 
   3  -4   8    0.68    0.07 
  -3  -4  -8    0.59    0.08 
  -3   4  -9    0.62    0.09 
   3   4   9    0.57    0.09 
   3   4   9    0.44    0.08 
  -3   4  -9    0.52    0.10 
   3  -4   9    0.41    0.08 
  -3  -4  -9    0.45    0.08 
  -3   4 -10    5.61    0.23 
  -3   4 -10    5.45    0.21 
   3   4  10    5.20    0.22 
   3  -4  10    4.93    0.21 
  -3  -4 -10    4.98    0.23 
  -3  -4 -10    5.26    0.21 
   3   4  11    2.35    0.17 
  -3   4 -11    2.69    0.19 
   3  -4  11    2.35    0.16 
  -3  -4 -11    2.47    0.16 
  -3  -4 -11    2.22    0.18 
  -3   4 -12    1.72    0.18 
   3   4  12    1.48    0.16 
  -3  -4 -12    1.30    0.15 
   3  -4  12    1.46    0.14 
   3   4  13    0.07    0.08 
  -3   4 -13    0.09    0.10 
   3  -4  13    0.10    0.08 
  -3  -4 -13    0.36    0.11 
   3   4  14    0.28    0.10 
  -3   4 -14    0.35    0.13 
   3  -4  14    0.27    0.11 
  -3  -4 -14    0.19    0.11 
  -3   4 -15    2.52    0.24 
   3  -4  15    2.27    0.20 
  -3   5  15    0.83    0.14 
   3   5 -15    0.84    0.17 
  -3  -5  15    0.73    0.12 
   3  -5 -15    0.73    0.14 
   3   5 -14    1.42    0.19 
  -3   5  14    1.28    0.15 
  -3  -5  14    1.47    0.15 
   3  -5 -14    1.38    0.16 
   3   5 -13    2.61    0.23 
  -3   5  13    2.62    0.19 
   3  -5 -13    2.41    0.19 
  -3  -5  13    2.09    0.16 
   3   5 -12    0.37    0.11 
  -3   5  12    0.51    0.10 
  -3  -5  12    0.35    0.08 
   3  -5 -12    0.44    0.10 
  -3  -5  12    0.34    0.08 
   3   5 -11    0.06    0.09 
  -3   5  11    0.05    0.07 
   3  -5 -11    0.09    0.07 
  -3  -5  11    0.16    0.06 
  -3  -5  11    0.13    0.07 
  -3   5  10    0.70    0.08 
  -3   5  10    0.62    0.10 
   3   5 -10    0.75    0.12 
  -3  -5  10    0.80    0.09 
   3  -5 -10    0.75    0.11 
  -3  -5  10    0.73    0.09 
  -3   5   9    1.11    0.09 
   3   5  -9    1.09    0.13 
  -3   5   9    1.22    0.12 
   3  -5  -9    1.37    0.13 
  -3  -5   9    1.26    0.11 
  -3  -5   9    1.29    0.10 
  -3   5   8    4.32    0.18 
   3   5  -8    4.23    0.20 
  -3   5   8    4.19    0.15 
   3   5  -8    4.24    0.15 
   3  -5  -8    4.28    0.15 
  -3  -5   8    4.26    0.15 
   3  -5  -8    3.90    0.18 
  -3  -5   8    4.21    0.17 
  -3   5   7    2.78    0.14 
   3   5  -7    2.86    0.12 
  -3   5   7    2.86    0.12 
   3   5  -7    2.66    0.16 
  -3   5   7    2.76    0.12 
   3  -5  -7    2.47    0.14 
  -3  -5   7    2.94    0.14 
  -3  -5   7    2.77    0.11 
  -3   5   6    0.18    0.04 
  -3   5   6    0.13    0.05 
   3   5  -6    0.14    0.07 
  -3   5   6    0.09    0.04 
   3   5  -6    0.04    0.04 
  -3   5   6    0.06    0.05 
  -3  -5   6    0.10    0.05 
  -3  -5   6    0.08    0.03 
  -3   5   5    4.41    0.15 
  -3   5   5    4.38    0.14 
   3   5  -5    4.66    0.17 
  -3   5   5    4.38    0.14 
  -3   5   5    4.61    0.16 
   3   5  -5    4.67    0.15 
  -3  -5   5    4.47    0.12 
  -3  -5   5    4.44    0.16 
   3   5  -4    0.13    0.05 
  -3   5   4    0.16    0.04 
  -3   5   4    0.14    0.04 
  -3   5   4    0.17    0.04 
   3   5  -4    0.16    0.04 
  -3  -5   4    0.06    0.04 
  -3  -5   4    0.13    0.03 
   3  -5  -4    0.04    0.04 
  -3   5   3    1.70    0.07 
  -3   5   3    1.49    0.09 
   3   5  -3    1.37    0.08 
   3   5  -3    1.56    0.10 
  -3   5   3    1.46    0.09 
  -3  -5   3    1.41    0.09 
   3  -5  -3    1.53    0.09 
   3   5  -2    0.43    0.06 
  -3   5   2    0.34    0.05 
  -3   5   2    0.29    0.05 
  -3   5   2    0.44    0.04 
   3   5  -2    0.36    0.05 
   3  -5  -2    0.44    0.05 
  -3  -5   2    0.38    0.06 
  -3   5   1   14.04    0.26 
   3   5  -1   13.75    0.30 
  -3   5   1   13.92    0.30 
   3   5  -1   14.45    0.31 
  -3   5   1   13.58    0.30 
   3  -5  -1   13.73    0.29 
  -3  -5   1   13.68    0.29 
   3   5   0    3.29    0.13 
  -3   5   0    3.48    0.09 
   3   5   0    3.75    0.13 
  -3   5   0    3.41    0.13 
  -3  -5   0    3.54    0.12 
   3  -5   0    3.38    0.13 
   3  -5   0    3.61    0.12 
  -3   5  -1   12.91    0.25 
   3   5   1   13.84    0.25 
   3   5   1   12.96    0.29 
  -3   5  -1   12.59    0.29 
   3   5   1   13.04    0.30 
  -3  -5  -1   13.59    0.28 
   3  -5   1   13.15    0.28 
   3  -5   1   12.88    0.29 
  -3   5  -2    8.29    0.22 
   3   5   2    8.59    0.19 
  -3   5  -2    8.63    0.19 
   3   5   2    8.24    0.22 
   3   5   2    8.43    0.22 
   3  -5   2    8.43    0.22 
  -3  -5  -2    8.65    0.20 
   3  -5   2    8.50    0.21 
  -3   5  -3    0.42    0.06 
  -3   5  -3    0.30    0.05 
   3   5   3    0.33    0.06 
   3   5   3    0.31    0.04 
   3  -5   3    0.33    0.05 
  -3  -5  -3    0.34    0.05 
  -3  -5  -3    0.27    0.06 
   3  -5   3    0.24    0.05 
   3   5   4    2.08    0.10 
  -3   5  -4    1.99    0.10 
   3   5   4    1.83    0.11 
  -3   5  -4    1.67    0.11 
   3  -5   4    1.84    0.11 
  -3  -5  -4    1.77    0.11 
  -3  -5  -4    2.06    0.09 
   3  -5   4    1.89    0.10 
   3   5   5    4.66    0.16 
  -3   5  -5    4.31    0.16 
  -3   5  -5    4.29    0.17 
   3   5   5    4.40    0.17 
  -3  -5  -5    4.53    0.13 
   3  -5   5    4.59    0.16 
   3  -5   5    4.43    0.16 
  -3  -5  -5    4.54    0.17 
   3   5   6    0.67    0.08 
   3   5   6    0.36    0.07 
  -3   5  -6    0.53    0.08 
  -3   5  -6    0.44    0.08 
   3  -5   6    0.48    0.07 
  -3  -5  -6    0.60    0.08 
   3  -5   6    0.43    0.07 
   3   5   7    4.50    0.17 
  -3   5  -7    4.68    0.18 
  -3   5  -7    4.61    0.18 
   3   5   7    4.46    0.18 
   3  -5   7    4.42    0.17 
   3  -5   7    4.26    0.17 
  -3  -5  -7    4.16    0.18 
  -3   5  -8   -0.08    0.06 
   3   5   8    0.10    0.06 
   3   5   8    0.04    0.06 
  -3   5  -8   -0.08    0.05 
   3  -5   8    0.09    0.06 
   3  -5   8    0.03    0.05 
  -3  -5  -8   -0.02    0.06 
   3   5   9    0.41    0.09 
  -3   5  -9    0.63    0.10 
   3   5   9    0.57    0.09 
  -3   5  -9    0.60    0.09 
  -3  -5  -9    0.67    0.09 
   3  -5   9    0.66    0.09 
   3   5  10    0.19    0.08 
  -3   5 -10    0.12    0.08 
  -3   5 -10    0.19    0.07 
   3   5  10    0.26    0.08 
   3  -5  10    0.23    0.07 
  -3  -5 -10    0.32    0.08 
   3   5  11    0.84    0.12 
  -3   5 -11    0.77    0.12 
  -3  -5 -11    1.02    0.12 
   3  -5  11    0.84    0.11 
  -3  -5 -11    0.83    0.12 
  -3   5 -12    0.12    0.09 
   3   5  12   -0.02    0.07 
  -3  -5 -12    0.01    0.09 
   3  -5  12    0.12    0.07 
  -3   5 -13   -0.10    0.09 
   3   5  13   -0.05    0.08 
   3  -5  13    0.07    0.07 
  -3  -5 -13    0.06    0.09 
   3   5  14    1.08    0.16 
  -3   5 -14    0.75    0.15 
  -3  -5 -14    1.00    0.15 
   3  -5  14    1.13    0.15 
   3  -5  15    0.23    0.11 
  -3   6  15    0.08    0.09 
   3   6 -15    0.09    0.13 
   3  -6 -15   -0.08    0.09 
  -3   6  14   -0.03    0.08 
   3   6 -14   -0.03    0.11 
   3  -6 -14    0.15    0.10 
  -3   6  13    0.36    0.10 
   3   6 -13    0.34    0.12 
  -3  -6  13    0.32    0.09 
   3  -6 -13    0.37    0.11 
  -3   6  12    0.02    0.08 
   3   6 -12   -0.05    0.10 
  -3  -6  12   -0.03    0.06 
   3  -6 -12    0.04    0.08 
   3   6 -11    6.74    0.29 
  -3   6  11    6.76    0.27 
  -3  -6  11    6.59    0.24 
   3  -6 -11    6.43    0.26 
   3   6 -10    3.33    0.20 
  -3   6  10    3.33    0.18 
  -3  -6  10    3.25    0.17 
   3  -6 -10    3.78    0.19 
  -3   6   9    0.76    0.09 
  -3   6   9    0.74    0.10 
   3   6  -9    0.77    0.12 
  -3  -6   9    0.79    0.09 
   3  -6  -9    0.73    0.10 
   3  -6  -9    0.74    0.08 
  -3  -6   9    0.77    0.10 
   3   6  -8    0.13    0.05 
  -3   6   8    0.10    0.05 
  -3   6   8    0.06    0.06 
   3   6  -8    0.06    0.08 
   3  -6  -8    0.06    0.06 
  -3  -6   8    0.10    0.04 
  -3  -6   8    0.03    0.06 
   3  -6  -8    0.04    0.05 
   3   6  -7    0.98    0.09 
  -3   6   7    1.03    0.09 
  -3   6   7    1.08    0.11 
   3   6  -7    0.87    0.11 
  -3   6   7    1.04    0.09 
  -3  -6   7    1.04    0.08 
  -3  -6   7    1.18    0.11 
   3  -6  -7    0.88    0.09 
  -3   6   6    0.18    0.05 
  -3   6   6    0.11    0.05 
  -3   6   6    0.02    0.04 
  -3   6   6    0.08    0.04 
   3   6  -6    0.06    0.07 
   3   6  -6    0.04    0.04 
  -3  -6   6    0.07    0.06 
  -3  -6   6    0.04    0.03 
  -3   6   5    0.65    0.07 
  -3   6   5    0.70    0.08 
   3   6  -5    0.51    0.08 
  -3   6   5    0.54    0.07 
  -3   6   5    0.69    0.07 
   3   6  -5    0.72    0.08 
  -3  -6   5    0.63    0.08 
  -3  -6   5    0.57    0.05 
   3   6  -4   16.22    0.36 
  -3   6   4   16.72    0.34 
  -3   6   4   17.44    0.37 
   3   6  -4   16.39    0.38 
  -3   6   4   16.88    0.36 
   3  -6  -4   16.42    0.37 
  -3  -6   4   16.81    0.30 
  -3  -6   4   16.13    0.37 
  -3   6   3    1.88    0.11 
   3   6  -3    1.78    0.10 
  -3   6   3    1.88    0.11 
  -3   6   3    2.00    0.08 
   3   6  -3    1.81    0.11 
   3  -6  -3    1.98    0.11 
  -3  -6   3    1.83    0.11 
   3   6  -2    5.59    0.18 
  -3   6   2    5.20    0.17 
   3   6  -2    5.46    0.18 
  -3   6   2    5.66    0.18 
  -3   6   2    5.64    0.14 
  -3  -6   2    5.64    0.18 
   3  -6  -2    5.95    0.17 
   3   6  -1    9.41    0.24 
  -3   6   1    9.12    0.24 
  -3   6   1    9.48    0.20 
   3   6  -1    9.25    0.24 
   3  -6  -1    9.23    0.24 
  -3  -6   1    9.35    0.24 
   3  -6  -1    9.20    0.23 
  -3   6   0   27.05    0.55 
   3   6   0   26.96    0.53 
  -3   6   0   27.98    0.49 
   3   6   0   27.52    0.55 
   3  -6   0   27.83    0.53 
  -3  -6   0   28.35    0.53 
   3  -6   0   28.06    0.54 
   3   6   1    0.11    0.02 
  -3   6  -1    0.11    0.05 
   3   6   1    0.09    0.04 
  -3   6  -1    0.06    0.03 
   3   6   1    0.06    0.04 
  -3  -6  -1    0.10    0.05 
   3  -6   1    0.08    0.05 
   3  -6   1    0.04    0.04 
   3   6   2    8.58    0.23 
   3   6   2    8.30    0.23 
   3   6   2    8.73    0.19 
  -3   6  -2    8.81    0.20 
  -3   6  -2    8.55    0.24 
   3  -6   2    9.14    0.22 
   3  -6   2    8.60    0.23 
  -3  -6  -2    8.55    0.22 
  -3   6  -3    0.85    0.08 
   3   6   3    0.87    0.08 
   3   6   3    0.84    0.07 
  -3   6  -3    0.80    0.09 
  -3  -6  -3    0.87    0.10 
  -3  -6  -3    0.95    0.08 
   3  -6   3    0.95    0.08 
   3  -6   3    0.69    0.08 
   3   6   4    0.00    0.04 
  -3   6  -4   -0.02    0.05 
   3   6   4   -0.03    0.04 
  -3   6  -4    0.03    0.05 
  -3  -6  -4    0.04    0.04 
   3  -6   4   -0.07    0.04 
   3  -6   4    0.02    0.04 
  -3  -6  -4   -0.02    0.05 
   3   6   5    2.98    0.15 
  -3   6  -5    2.91    0.15 
  -3   6  -5    2.95    0.14 
   3   6   5    3.11    0.13 
   3  -6   5    2.92    0.14 
  -3  -6  -5    3.05    0.16 
   3  -6   5    3.11    0.14 
  -3  -6  -5    2.99    0.12 
  -3   6  -6    0.04    0.06 
  -3   6  -6    0.08    0.06 
   3   6   6    0.07    0.05 
   3   6   6    0.16    0.06 
   3  -6   6    0.07    0.05 
  -3  -6  -6    0.04    0.06 
   3  -6   6    0.10    0.06 
   3   6   7    4.16    0.17 
  -3   6  -7    3.97    0.18 
   3   6   7    3.95    0.18 
  -3   6  -7    4.31    0.18 
   3  -6   7    4.24    0.18 
   3  -6   7    4.00    0.17 
  -3  -6  -7    4.01    0.18 
  -3   6  -8    8.57    0.27 
   3   6   8    7.92    0.27 
  -3   6  -8    8.29    0.27 
   3   6   8    8.24    0.27 
   3  -6   8    8.20    0.25 
  -3  -6  -8    8.51    0.27 
   3  -6   8    8.52    0.26 
   3   6   9    8.05    0.27 
  -3   6  -9    7.61    0.27 
   3   6   9    7.71    0.28 
  -3   6  -9    7.81    0.26 
   3  -6   9    7.93    0.26 
   3  -6   9    7.79    0.25 
  -3  -6  -9    7.72    0.26 
   3   6  10    0.45    0.10 
   3   6  10    0.54    0.10 
  -3   6 -10    0.52    0.11 
  -3   6 -10    0.58    0.10 
  -3  -6 -10    0.65    0.10 
   3  -6  10    0.44    0.09 
   3   6  11    0.23    0.09 
  -3   6 -11    0.14    0.10 
  -3  -6 -11    0.21    0.09 
   3  -6  11    0.26    0.08 
  -3  -6 -11    0.21    0.10 
   3   6  12    0.58    0.11 
  -3  -6 -12    0.22    0.10 
   3  -6  12    0.35    0.09 
   3   6  13    0.55    0.12 
   3  -6  13    0.62    0.12 
  -3  -6 -13    0.75    0.14 
   3   6  14    0.20    0.10 
   3  -6  14    0.00    0.08 
  -3   7  15    1.12    0.16 
   3   7 -15    0.88    0.18 
   3  -7 -15    0.87    0.15 
   3   7 -14   -0.13    0.12 
  -3   7  14    0.19    0.10 
   3  -7 -14    0.15    0.11 
   3   7 -13    1.16    0.17 
  -3   7  13    1.17    0.15 
   3  -7 -13    0.98    0.14 
  -3  -7  13    0.93    0.13 
  -3   7  12    1.45    0.16 
   3   7 -12    1.12    0.16 
  -3  -7  12    1.12    0.13 
   3  -7 -12    1.01    0.14 
  -3   7  11   -0.04    0.07 
   3   7 -11    0.00    0.10 
   3  -7 -11    0.14    0.09 
  -3  -7  11   -0.01    0.06 
  -3   7  10    2.56    0.17 
   3   7 -10    2.46    0.20 
   3  -7 -10    2.57    0.18 
  -3  -7  10    2.67    0.17 
  -3   7   9    1.15    0.13 
   3   7  -9    1.08    0.13 
  -3   7   9    1.14    0.11 
  -3  -7   9    0.99    0.11 
   3  -7  -9    1.37    0.13 
   3  -7  -9    1.17    0.11 
  -3   7   8    2.34    0.13 
   3   7  -8    2.11    0.17 
  -3   7   8    2.28    0.13 
   3   7  -8    2.21    0.13 
  -3   7   8    2.18    0.14 
  -3  -7   8    2.03    0.15 
   3  -7  -8    2.18    0.15 
  -3   7   7    2.28    0.13 
  -3   7   7    2.06    0.14 
   3   7  -7    2.11    0.13 
   3   7  -7    2.43    0.17 
  -3   7   7    2.03    0.13 
  -3   7   7    2.16    0.13 
  -3  -7   7    1.92    0.14 
  -3   7   6   11.03    0.30 
   3   7  -6   10.31    0.31 
   3   7  -6   10.74    0.28 
  -3   7   6   10.97    0.29 
  -3   7   6   11.23    0.29 
  -3   7   6   11.34    0.28 
  -3  -7   6   10.82    0.30 
  -3   7   5    0.09    0.05 
  -3   7   5    0.07    0.05 
   3   7  -5    0.04    0.05 
  -3   7   5    0.04    0.04 
   3   7  -5    0.11    0.07 
  -3  -7   5    0.05    0.06 
   3  -7  -5   -0.01    0.06 
  -3   7   4    1.07    0.08 
  -3   7   4    1.19    0.10 
   3   7  -4    0.89    0.09 
   3   7  -4    0.96    0.10 
  -3   7   4    1.24    0.10 
   3  -7  -4    1.07    0.10 
  -3  -7   4    0.79    0.09 
  -3   7   3    1.36    0.08 
  -3   7   3    1.27    0.11 
   3   7  -3    1.29    0.10 
   3   7  -3    1.34    0.11 
   3  -7  -3    1.22    0.11 
  -3  -7   3    1.27    0.11 
   3  -7  -3    1.34    0.10 
   3   7  -2    5.03    0.18 
  -3   7   2    5.34    0.15 
  -3   7   2    5.11    0.18 
   3   7  -2    5.22    0.18 
   3  -7  -2    5.07    0.17 
  -3  -7   2    5.17    0.18 
   3  -7  -2    4.99    0.18 
  -3   7   1    0.04    0.03 
   3   7  -1    0.01    0.05 
   3   7  -1    0.06    0.05 
  -3   7   1    0.03    0.05 
   3  -7  -1   -0.01    0.05 
   3  -7  -1   -0.04    0.05 
  -3  -7   1    0.02    0.05 
  -3   7   0    3.26    0.15 
   3   7   0    3.14    0.14 
  -3   7   0    3.30    0.11 
   3   7   0    2.94    0.14 
   3  -7   0    3.20    0.13 
  -3  -7   0    2.80    0.14 
  -3   7  -1    2.90    0.10 
  -3   7  -1    2.96    0.14 
   3   7   1    2.94    0.13 
   3   7   1    2.84    0.14 
   3  -7   1    3.17    0.13 
  -3  -7  -1    2.94    0.13 
  -3   7  -2    3.64    0.16 
  -3   7  -2    3.69    0.12 
   3   7   2    3.68    0.15 
   3   7   2    3.61    0.16 
   3  -7   2    3.86    0.16 
  -3  -7  -2    3.72    0.15 
   3  -7   2    3.69    0.14 
  -3   7  -3    1.17    0.09 
   3   7   3    1.03    0.10 
  -3   7  -3    1.40    0.11 
   3   7   3    1.36    0.11 
  -3  -7  -3    1.33    0.10 
   3  -7   3    1.24    0.12 
   3  -7   3    1.37    0.09 
   3   7   4    2.50    0.14 
   3   7   4    2.79    0.12 
  -3   7  -4    2.29    0.14 
  -3   7  -4    2.75    0.13 
   3  -7   4    2.65    0.15 
  -3  -7  -4    2.55    0.15 
   3  -7   4    2.58    0.12 
  -3  -7  -4    2.55    0.12 
  -3   7  -5    0.04    0.06 
   3   7   5    0.00    0.04 
  -3   7  -5    0.12    0.06 
   3   7   5   -0.05    0.05 
  -3  -7  -5   -0.05    0.06 
   3  -7   5   -0.01    0.05 
  -3  -7  -5    0.04    0.05 
   3  -7   5    0.08    0.06 
  -3   7  -6    0.13    0.07 
   3   7   6    0.09    0.06 
   3   7   6    0.07    0.05 
  -3   7  -6    0.12    0.07 
   3  -7   6    0.09    0.07 
   3  -7   6    0.07    0.05 
  -3  -7  -6    0.01    0.06 
   3   7   7    3.30    0.16 
  -3   7  -7    3.07    0.17 
   3   7   7    3.51    0.18 
  -3  -7  -7    3.42    0.18 
   3  -7   7    3.11    0.15 
   3  -7   7    2.97    0.16 
   3   7   8    2.12    0.16 
   3   7   8    2.17    0.14 
  -3   7  -8    2.18    0.15 
   3  -7   8    2.21    0.14 
  -3  -7  -8    2.05    0.15 
   3  -7   8    2.06    0.15 
   3   7   9    2.79    0.18 
   3   7   9    2.69    0.16 
  -3   7  -9    2.79    0.17 
   3  -7   9    2.69    0.16 
   3  -7   9    2.77    0.16 
  -3  -7  -9    2.54    0.17 
   3   7  10    2.63    0.19 
   3   7  10    3.24    0.19 
  -3   7 -10    2.63    0.18 
  -3  -7 -10    2.99    0.19 
   3  -7  10    2.78    0.18 
   3   7  11    2.98    0.20 
   3   7  11    2.39    0.20 
   3  -7  11    2.74    0.18 
   3   7  12   -0.05    0.08 
   3  -7  12    0.12    0.08 
  -3  -7 -12    0.04    0.09 
   3   7  13    1.44    0.17 
  -3  -7 -13    1.09    0.16 
   3   7  14    0.64    0.13 
   3   8 -14    1.39    0.20 
  -3   8  14    1.88    0.20 
   3  -8 -14    1.62    0.19 
   3   8 -13    0.76    0.16 
  -3   8  13    0.83    0.14 
   3  -8 -13    0.83    0.14 
  -3  -8  13    0.72    0.12 
   3   8 -12    0.17    0.12 
  -3   8  12    0.17    0.09 
  -3  -8  12    0.15    0.08 
   3  -8 -12    0.08    0.09 
   3   8 -11    0.23    0.11 
  -3   8  11    0.36    0.10 
   3  -8 -11    0.25    0.09 
  -3  -8  11    0.30    0.09 
   3   8 -10    0.14    0.10 
  -3   8  10    0.38    0.09 
  -3  -8  10    0.35    0.10 
   3  -8 -10    0.20    0.09 
   3   8  -9    5.60    0.26 
  -3   8   9    5.38    0.23 
  -3   8   9    5.96    0.23 
   3  -8  -9    5.62    0.23 
   3  -8  -9    5.66    0.22 
  -3  -8   9    5.44    0.23 
  -3   8   8    4.53    0.19 
   3   8  -8    4.75    0.23 
  -3   8   8    4.65    0.20 
   3   8  -8    4.04    0.18 
  -3   8   8    4.80    0.20 
  -3   8   8    4.97    0.21 
  -3  -8   8    4.90    0.22 
  -3   8   7    3.58    0.16 
  -3   8   7    3.79    0.18 
  -3   8   7    3.42    0.17 
   3   8  -7    3.22    0.19 
   3   8  -7    2.91    0.16 
  -3   8   7    3.68    0.17 
   3  -8  -7    3.37    0.17 
  -3  -8   7    3.47    0.18 
  -3   8   6   19.23    0.45 
  -3   8   6   19.29    0.44 
  -3   8   6   19.55    0.43 
   3   8  -6   19.93    0.46 
   3   8  -6   18.83    0.44 
   3  -8  -6   19.23    0.45 
  -3  -8   6   19.38    0.46 
   3   8  -5   26.27    0.56 
  -3   8   5   26.51    0.55 
   3   8  -5   26.72    0.56 
  -3   8   5   26.31    0.53 
  -3   8   5   25.83    0.55 
   3  -8  -5   26.15    0.55 
  -3  -8   5   25.81    0.56 
   3  -8  -5   26.65    0.55 
   3   8  -4    3.32    0.16 
   3   8  -4    3.33    0.16 
  -3   8   4    3.24    0.16 
  -3   8   4    3.16    0.13 
   3  -8  -4    3.04    0.16 
  -3  -8   4    3.37    0.17 
   3  -8  -4    3.33    0.16 
   3   8  -3    0.01    0.05 
   3   8  -3    0.08    0.05 
  -3   8   3    0.01    0.04 
  -3   8   3    0.08    0.06 
  -3  -8   3    0.06    0.06 
   3  -8  -3    0.06    0.06 
   3  -8  -3    0.03    0.06 
   3   8  -2    0.96    0.10 
   3   8  -2    1.00    0.10 
  -3   8   2    1.06    0.11 
  -3   8   2    1.13    0.08 
   3  -8  -2    1.11    0.12 
  -3  -8   2    0.81    0.10 
   3  -8  -2    0.80    0.08 
   3   8  -1    4.57    0.18 
  -3   8   1    4.62    0.19 
   3   8  -1    4.57    0.17 
   3  -8  -1    4.39    0.18 
   3  -8  -1    4.41    0.16 
  -3  -8   1    4.76    0.18 
   3   8   0    0.09    0.06 
  -3   8   0   -0.02    0.05 
   3   8   0    0.10    0.05 
   3  -8   0    0.11    0.06 
  -3  -8   0    0.11    0.06 
   3  -8   0    0.18    0.07 
  -3   8  -1    1.06    0.12 
   3   8   1    1.06    0.11 
   3   8   1    1.27    0.11 
  -3  -8  -1    1.27    0.11 
   3  -8   1    1.13    0.11 
   3  -8   1    1.33    0.10 
   3   8   2    0.69    0.09 
  -3   8  -2    0.60    0.09 
   3   8   2    0.62    0.08 
  -3  -8  -2    0.69    0.08 
   3  -8   2    0.70    0.07 
   3  -8   2    0.62    0.09 
  -3   8  -3    0.03    0.06 
   3   8   3   -0.05    0.05 
   3   8   3   -0.06    0.05 
   3  -8   3    0.00    0.06 
  -3  -8  -3    0.06    0.06 
   3  -8   3   -0.05    0.04 
  -3   8  -4    0.01    0.06 
   3   8   4    0.03    0.05 
   3  -8   4   -0.07    0.06 
   3  -8   4   -0.03    0.04 
  -3  -8  -4   -0.04    0.05 
  -3  -8  -4   -0.03    0.06 
  -3   8  -5    0.20    0.07 
   3   8   5    0.18    0.07 
   3  -8   5    0.31    0.07 
  -3  -8  -5    0.31    0.08 
  -3  -8  -5    0.15    0.06 
   3  -8   5    0.15    0.07 
  -3   8  -6    0.83    0.11 
   3   8   6    0.95    0.11 
   3  -8   6    0.91    0.11 
  -3  -8  -6    1.32    0.14 
  -3   8  -7    2.68    0.17 
   3   8   7    2.44    0.17 
  -3  -8  -7    2.93    0.18 
   3  -8   7    3.27    0.17 
   3   8   8    3.76    0.20 
  -3   8  -8    4.17    0.20 
  -3  -8  -8    3.81    0.20 
   3  -8   8    3.91    0.20 
   3   8   9    0.72    0.12 
  -3   8  -9    0.62    0.10 
  -3  -8  -9    0.55    0.10 
   3  -8   9    0.61    0.10 
  -3   8 -10    0.24    0.09 
   3   8  10    0.36    0.11 
  -3  -8 -10    0.18    0.09 
   3   8  11    1.17    0.15 
  -3  -8 -12    0.34    0.11 
  -3   9  14    0.52    0.13 
   3   9 -14    0.38    0.16 
   3  -9 -14    0.65    0.15 
  -3   9  13    0.10    0.10 
   3   9 -13    0.21    0.14 
   3  -9 -13    0.45    0.13 
  -3  -9  13    0.24    0.10 
  -3   9  12    0.27    0.10 
   3   9 -12    0.34    0.14 
   3  -9 -12    0.38    0.12 
  -3  -9  12    0.11    0.09 
   3   9 -11    0.38    0.13 
  -3   9  11    0.47    0.11 
  -3  -9  11    0.45    0.11 
   3  -9 -11    0.45    0.11 
  -3   9  10    0.21    0.09 
   3   9 -10    0.10    0.10 
  -3  -9  10    0.36    0.10 
   3  -9 -10    0.30    0.09 
   3   9  -9    0.13    0.10 
  -3   9   9    0.15    0.08 
   3  -9  -9    0.10    0.07 
   3  -9  -9    0.00    0.07 
  -3  -9   9    0.12    0.08 
   3   9  -8    0.35    0.10 
  -3   9   8    0.45    0.09 
   3   9  -8    0.49    0.09 
  -3   9   8    0.29    0.08 
  -3  -9   8    0.38    0.10 
   3  -9  -8    0.29    0.08 
   3  -9  -8    0.36    0.09 
   3   9  -7   -0.08    0.07 
  -3   9   7    0.02    0.06 
   3   9  -7    0.00    0.06 
  -3  -9   7    0.11    0.08 
   3  -9  -7   -0.03    0.06 
   3  -9  -7   -0.08    0.06 
   3   9  -6    1.29    0.14 
  -3   9   6    1.42    0.13 
   3   9  -6    1.15    0.12 
   3  -9  -6    1.29    0.13 
   3  -9  -6    1.32    0.12 
  -3  -9   6    0.96    0.12 
  -3   9   5    0.15    0.07 
   3   9  -5   -0.04    0.06 
   3   9  -5    0.13    0.07 
   3  -9  -5    0.05    0.07 
  -3  -9   5    0.06    0.07 
   3  -9  -5    0.14    0.07 
  -3   9   4    5.53    0.22 
   3   9  -4    5.56    0.22 
   3   9  -4    5.70    0.22 
   3  -9  -4    4.98    0.21 
  -3  -9   4    6.02    0.23 
  -3   9   3   13.39    0.36 
   3   9  -3   13.22    0.35 
   3   9  -3   13.32    0.34 
  -3  -9   3   13.41    0.36 
   3  -9  -3   12.97    0.35 
  -3   9   2    9.27    0.28 
   3   9  -2    8.48    0.26 
   3   9  -2    9.08    0.28 
  -3  -9   2    8.56    0.27 
   3  -9  -2    8.97    0.28 
   3   9  -1    0.22    0.07 
   3   9  -1    0.23    0.07 
  -3   9   1    0.33    0.08 
  -3  -9   1    0.26    0.08 
   3  -9  -1    0.33    0.08 
   3   9   0    0.09    0.07 
  -3   9   0    0.14    0.07 
   3   9   0    0.04    0.06 
   3  -9   0    0.15    0.07 
  -3  -9   0    0.09    0.07 
   3   9   1    0.02    0.06 
  -3   9  -1    0.07    0.06 
   3   9   1    0.01    0.05 
   3  -9   1    0.02    0.06 
  -3  -9  -1   -0.06    0.06 
   3   9   2   -0.06    0.05 
  -3   9  -2   -0.09    0.05 
   3   9   2   -0.01    0.06 
  -3  -9  -2   -0.04    0.06 
   3  -9   2   -0.02    0.07 
  -3   9  -3    4.20    0.20 
   3   9   3    4.83    0.21 
   3   9   3    4.77    0.20 
  -3  -9  -3    4.38    0.18 
   3  -9   3    4.49    0.20 
   3   9   4    1.30    0.12 
  -3   9  -4    1.38    0.14 
  -3  -9  -4    1.24    0.13 
  -3  -9  -4    1.10    0.11 
   3  -9   4    1.08    0.12 
  -3   9  -5    0.03    0.07 
   3   9   5   -0.02    0.06 
   3  -9   5    0.07    0.07 
  -3  -9  -5    0.02    0.07 
  -3   9  -6    3.17    0.19 
   3   9   6    3.66    0.19 
   3  -9   6    3.44    0.19 
  -3  -9  -6    3.50    0.20 
  -3   9  -7    5.90    0.25 
   3   9   7    5.64    0.24 
  -3  -9  -7    5.72    0.25 
   3  -9   7    5.69    0.24 
   3   9   8    4.09    0.21 
  -3   9  -8    3.75    0.21 
   3  -9   8    3.94    0.21 
  -3  -9  -8    3.60    0.21 
   3   9   9   -0.02    0.07 
  -3   9  -9    0.00    0.07 
  -3  -9  -9    0.12    0.08 
   3  -9   9    0.05    0.08 
  -3   9 -10    0.18    0.09 
   3   9  10    0.20    0.10 
  -3  -9 -10    0.14    0.10 
   3   9  11   -0.02    0.09 
  -3  -9 -12    0.06    0.11 
  -3 -10  13   -0.07    0.09 
  -3 -10  12   -0.01    0.09 
   3  10 -11    0.29    0.12 
  -3 -10  11    0.28    0.11 
   3  10 -10    0.18    0.11 
  -3 -10  10    0.29    0.10 
   3  10  -9   -0.14    0.08 
  -3 -10   9   -0.03    0.08 
   3  10  -8    1.75    0.16 
   3  10  -8    1.67    0.17 
  -3  10   8    2.12    0.16 
   3 -10  -8    1.91    0.16 
  -3 -10   8    1.85    0.17 
  -3  10   7    0.65    0.10 
   3  10  -7    0.60    0.11 
   3  10  -7    0.72    0.11 
   3 -10  -7    0.56    0.10 
  -3 -10   7    0.60    0.11 
   3  10  -6    0.24    0.09 
   3  10  -6    0.16    0.07 
  -3  10   6    0.29    0.08 
   3 -10  -6    0.23    0.08 
  -3 -10   6    0.18    0.08 
   3  10  -5    1.02    0.12 
  -3  10   5    0.87    0.12 
   3  10  -5    0.93    0.11 
  -3 -10   5    0.87    0.12 
   3 -10  -5    1.08    0.12 
  -3  10   4    2.52    0.17 
   3  10  -4    1.94    0.15 
   3  10  -4    2.31    0.16 
   3 -10  -4    2.17    0.16 
  -3 -10   4    2.19    0.16 
   3  10  -3    0.07    0.07 
  -3  10   3    0.11    0.07 
   3  10  -3   -0.02    0.06 
  -3 -10   3   -0.02    0.07 
   3 -10  -3    0.03    0.07 
  -3  10   2   -0.02    0.07 
   3  10  -2    0.12    0.07 
   3  10  -2    0.15    0.07 
   3 -10  -2    0.11    0.07 
  -3 -10   2    0.15    0.08 
   3  10  -1    0.52    0.09 
   3  10  -1    0.38    0.09 
  -3  10   1    0.34    0.08 
  -3 -10   1    0.33    0.09 
   3 -10  -1    0.50    0.09 
   3  10   0    0.34    0.08 
   3  10   0    0.40    0.09 
  -3  10   0    0.55    0.10 
  -3 -10   0    0.47    0.09 
   3 -10   0    0.37    0.09 
  -3  10  -1    0.19    0.08 
   3  10   1    0.04    0.07 
   3  10   1    0.12    0.06 
   3 -10   1    0.01    0.07 
  -3 -10  -1    0.04    0.07 
   3  10   2    0.94    0.11 
  -3  10  -2    0.96    0.12 
   3  10   2    1.01    0.12 
   3 -10   2    0.81    0.12 
  -3 -10  -2    1.08    0.12 
   3  10   3    2.69    0.18 
   3  10   3    3.16    0.17 
  -3  10  -3    2.76    0.18 
   3 -10   3    2.81    0.18 
  -3 -10  -3    3.19    0.17 
  -3  10  -4    1.16    0.13 
   3  10   4    0.92    0.12 
   3  10   4    1.02    0.12 
   3 -10   4    0.78    0.12 
  -3 -10  -4    0.90    0.12 
  -3 -10  -4    0.91    0.11 
  -3  10  -5    7.20    0.28 
   3  10   5    7.28    0.27 
  -3 -10  -5    7.24    0.28 
   3 -10   5    7.01    0.27 
  -3  10  -6    5.18    0.24 
   3  10   6    4.83    0.23 
  -3 -10  -6    4.82    0.24 
   3 -10   6    5.65    0.24 
   3  10   7    0.79    0.12 
  -3  10  -7    0.51    0.11 
  -3 -10  -7    0.71    0.12 
   3 -10   7    0.64    0.11 
   3  10   8    3.93    0.22 
  -3  10  -8    4.07    0.22 
  -3 -10  -8    3.99    0.23 
   3 -10   8    3.87    0.22 
   3  10   9    0.06    0.09 
  -3  10  -9   -0.10    0.08 
  -3 -10  -9   -0.06    0.08 
   3 -10   9    0.02    0.09 
   3  10  10    0.43    0.12 
  -3  10 -10    0.35    0.11 
  -3 -10 -10    0.43    0.12 
   3 -10  10    0.29    0.12 
   3  10  11   -0.04    0.10 
  -3 -11  11    1.23    0.16 
  -3 -11  10    0.02    0.09 
  -3 -11   9    0.04    0.09 
  -3  11   8    0.36    0.10 
   3  11  -8    0.34    0.10 
   3 -11  -8    0.37    0.11 
  -3 -11   8    0.23    0.10 
   3  11  -7    1.39    0.15 
   3  11  -7    1.42    0.15 
  -3  11   7    1.84    0.16 
   3 -11  -7    1.58    0.16 
  -3 -11   7    1.45    0.16 
   3  11  -6    0.00    0.08 
   3  11  -6    0.15    0.08 
  -3  11   6    0.22    0.08 
   3 -11  -6    0.11    0.08 
  -3 -11   6    0.07    0.08 
   3  11  -5    0.48    0.10 
   3  11  -5    0.23    0.09 
  -3  11   5    0.54    0.11 
  -3 -11   5    0.28    0.10 
   3 -11  -5    0.15    0.09 
   3  11  -4    0.16    0.08 
  -3  11   4    0.17    0.08 
   3  11  -4    0.09    0.08 
  -3 -11   4    0.14    0.09 
   3 -11  -4    0.09    0.08 
  -3  11   3    0.15    0.08 
   3  11  -3    0.17    0.08 
   3  11  -3    0.06    0.07 
   3 -11  -3    0.11    0.09 
  -3 -11   3    0.06    0.08 
   3  11  -2    1.01    0.11 
   3  11  -2    0.91    0.12 
  -3  11   2    0.81    0.12 
   3 -11  -2    0.89    0.12 
  -3 -11   2    0.92    0.12 
   3  11  -1    0.18    0.08 
   3  11  -1    0.09    0.07 
  -3  11   1    0.15    0.09 
   3 -11  -1    0.03    0.08 
  -3 -11   1    0.26    0.09 
   3  11   0    0.20    0.08 
  -3  11   0    0.22    0.08 
   3  11   0    0.18    0.07 
   3 -11   0    0.28    0.09 
  -3 -11   0    0.16    0.09 
   3  11   1    0.40    0.09 
   3  11   1    0.64    0.10 
  -3  11  -1    0.51    0.10 
  -3 -11  -1    0.59    0.10 
   3 -11   1    0.65    0.11 
   3  11   2   -0.04    0.06 
  -3  11  -2    0.11    0.08 
   3  11   2    0.03    0.07 
  -3 -11  -2    0.05    0.07 
   3 -11   2    0.10    0.08 
   3  11   3    0.19    0.08 
  -3  11  -3    0.22    0.09 
   3  11   3    0.23    0.09 
  -3 -11  -3    0.22    0.09 
   3 -11   3    0.19    0.09 
  -3  11  -4    3.03    0.20 
   3  11   4    2.85    0.18 
   3  11   4    2.95    0.20 
   3 -11   4    2.76    0.20 
  -3 -11  -4    2.63    0.20 
  -3 -11  -4    2.82    0.18 
  -3  11  -5    0.95    0.13 
   3  11   5    1.30    0.14 
   3 -11   5    0.93    0.13 
  -3 -11  -5    1.13    0.14 
  -3  11  -6    0.07    0.08 
   3  11   6    0.26    0.09 
  -3 -11  -6    0.21    0.10 
   3 -11   6    0.26    0.10 
  -3  11  -7    0.03    0.08 
   3  11   7   -0.04    0.08 
   3 -11   7    0.00    0.09 
  -3 -11  -7    0.04    0.09 
   3  11   8   -0.03    0.08 
  -3  11  -8   -0.10    0.08 
   3 -11   8   -0.01    0.09 
  -3 -11  -8    0.01    0.09 
   3  11   9    1.37    0.16 
  -3  11  -9    1.25    0.16 
  -3 -11  -9    1.27    0.16 
   3 -11   9    1.09    0.15 
   3  11  10    0.85    0.14 
  -3  11 -10    0.47    0.12 
  -3 -11 -10    0.61    0.14 
   3 -11  10    0.71    0.14 
  -3 -12   9    0.16    0.10 
   3  12  -8    1.65    0.17 
  -3  12   8    1.74    0.18 
  -3 -12   8    1.74    0.19 
  -3  12   7    0.02    0.08 
   3  12  -7   -0.12    0.07 
  -3 -12   7    0.13    0.10 
   3 -12  -7   -0.02    0.09 
  -3  12   6    5.37    0.26 
   3  12  -6    4.72    0.24 
  -3 -12   6    4.98    0.26 
   3 -12  -6    5.77    0.26 
   3  12  -5    1.83    0.18 
  -3  12   5    1.94    0.18 
   3 -12  -5    1.98    0.18 
  -3 -12   5    2.23    0.19 
  -3  12   4    0.45    0.10 
   3  12  -4    0.50    0.11 
  -3 -12   4    0.30    0.10 
   3 -12  -4    0.54    0.11 
  -3  12   3    0.32    0.10 
   3  12  -3    0.14    0.09 
   3 -12  -3    0.30    0.10 
  -3 -12   3    0.43    0.11 
  -3  12   2   -0.11    0.07 
   3  12  -2   -0.05    0.07 
   3 -12  -2    0.05    0.09 
  -3 -12   2    0.02    0.08 
   3  12  -1   -0.10    0.06 
   3  12  -1    0.06    0.08 
  -3  12   1    0.00    0.08 
   3 -12  -1    0.00    0.09 
  -3 -12   1   -0.05    0.08 
   3  12   0   -0.07    0.06 
   3  12   0    0.00    0.08 
  -3  12   0    0.04    0.08 
   3 -12   0    0.04    0.08 
  -3 -12   0   -0.06    0.07 
   3  12   1    1.04    0.13 
  -3  12  -1    0.87    0.13 
   3  12   1    1.00    0.14 
  -3 -12  -1    1.00    0.13 
   3 -12   1    1.09    0.14 
   3  12   2    0.06    0.08 
   3  12   2   -0.01    0.08 
  -3  12  -2   -0.02    0.08 
  -3 -12  -2    0.06    0.08 
   3 -12   2    0.08    0.09 
   3  12   3    0.10    0.08 
   3  12   3    0.09    0.09 
  -3  12  -3   -0.01    0.08 
  -3 -12  -3    0.22    0.09 
   3 -12   3    0.01    0.09 
  -3  12  -4    0.23    0.10 
   3  12   4    0.10    0.08 
   3 -12   4    0.19    0.10 
  -3 -12  -4    0.09    0.09 
   3  12   5    0.34    0.10 
  -3  12  -5    0.26    0.11 
  -3 -12  -5    0.30    0.11 
   3 -12   5    0.34    0.11 
   3  12   6    0.29    0.09 
  -3  12  -6    0.28    0.10 
   3 -12   6    0.31    0.12 
  -3 -12  -6    0.24    0.11 
  -3  12  -7    0.13    0.10 
   3  12   7    0.19    0.10 
   3 -12   7   -0.13    0.09 
  -3 -12  -7    0.00    0.09 
   3  12   8    0.43    0.12 
  -3  12  -8    0.16    0.11 
  -3 -12  -8    0.30    0.12 
   3 -12   8    0.13    0.11 
  -3  12  -9    0.21    0.11 
   3  12   9    0.12    0.11 
  -3 -12  -9    0.37    0.13 
   3 -12   9    0.27    0.11 
  -3  13   8    0.03    0.10 
  -3  13   7   -0.06    0.10 
   3  13  -7   -0.05    0.09 
  -3 -13   7    0.05    0.10 
   3 -13  -7    0.13    0.10 
   3  13  -6    0.03    0.09 
  -3  13   6    0.00    0.09 
  -3 -13   6   -0.04    0.09 
   3 -13  -6    0.05    0.10 
   3  13  -5    0.51    0.11 
  -3  13   5    0.76    0.14 
  -3 -13   5    0.64    0.13 
   3 -13  -5    0.59    0.13 
  -3  13   4    0.15    0.09 
   3  13  -4    0.06    0.09 
  -3 -13   4    0.08    0.10 
   3 -13  -4    0.18    0.10 
   3  13  -3    2.52    0.20 
  -3  13   3    2.50    0.20 
   3 -13  -3    2.20    0.20 
  -3 -13   3    2.28    0.19 
   3  13  -2    0.96    0.14 
  -3  13   2    1.04    0.15 
  -3 -13   2    1.23    0.15 
   3 -13  -2    0.98    0.15 
   3  13  -1    0.19    0.10 
  -3  13   1   -0.02    0.08 
  -3 -13   1    0.15    0.10 
   3 -13  -1    0.06    0.10 
  -3  13   0    0.05    0.08 
   3  13   0    0.02    0.08 
   3 -13   0    0.08    0.09 
  -3 -13   0    0.09    0.09 
   3  13   1    0.28    0.10 
  -3  13  -1    0.33    0.11 
   3 -13   1    0.42    0.11 
  -3 -13  -1    0.23    0.10 
   3  13   2    0.43    0.12 
  -3  13  -2    0.26    0.11 
  -3 -13  -2    0.24    0.11 
   3 -13   2    0.41    0.11 
  -3  13  -3   -0.06    0.08 
   3  13   3   -0.06    0.08 
   3 -13   3    0.16    0.11 
  -3 -13  -3   -0.11    0.09 
  -3  13  -4    0.22    0.10 
  -3 -13  -4    0.34    0.12 
   3 -13   4    0.18    0.11 
  -3  13  -5    0.18    0.11 
   3 -13   5    0.14    0.11 
  -3 -13  -5    0.10    0.11 
  -3  13  -6    0.40    0.13 
   3 -13   6    0.03    0.10 
  -3 -13  -6    0.31    0.12 
   3 -14  -6    1.97    0.21 
  -3  14   5    0.04    0.11 
   3  14  -5   -0.07    0.10 
   3 -14  -5   -0.03    0.10 
  -3  14   4    0.04    0.10 
   3  14  -4    0.09    0.10 
   3 -14  -4   -0.12    0.10 
   3  14  -3    0.38    0.12 
  -3  14   3    0.14    0.10 
   3 -14  -3    0.21    0.11 
  -3 -14   3   -0.03    0.10 
  -3  14   2   -0.01    0.09 
   3  14  -2   -0.06    0.08 
   3 -14  -2    0.03    0.10 
  -3 -14   2    0.12    0.11 
  -3  14   1    2.74    0.22 
   3  14  -1    3.01    0.23 
   3 -14  -1    2.42    0.22 
  -3 -14   1    2.66    0.23 
  -3  14   0    1.21    0.16 
   3  14   0    1.47    0.17 
   3 -14   0    1.24    0.17 
  -3 -14   0    1.56    0.17 
   3  14   1    0.92    0.15 
  -3  14  -1    0.96    0.15 
  -3 -14  -1    1.05    0.16 
   3 -14   1    0.75    0.14 
  -3  14  -2   -0.04    0.10 
   3  14   2   -0.07    0.09 
  -3 -14  -2    0.12    0.10 
   4   0 -16    0.61    0.15 
  -4   0  16    0.60    0.12 
  -4   0  15   -0.01    0.07 
   4   0 -15   -0.09    0.10 
  -4   0  14    0.55    0.11 
   4   0 -14    0.74    0.13 
  -4   0  13    0.05    0.07 
   4   0 -13    0.05    0.09 
  -4   0  12   17.71    0.46 
  -4   0  12   18.00    0.40 
   4   0 -12   17.33    0.46 
  -4   0  11    0.17    0.07 
  -4   0  11    0.23    0.06 
   4   0 -11    0.28    0.09 
   4   0 -10    3.51    0.19 
  -4   0  10    3.87    0.15 
  -4   0  10    3.91    0.18 
  -4   0   9   -0.02    0.03 
  -4   0   9    0.01    0.05 
   4   0  -9    0.01    0.07 
   4   0  -8    0.57    0.08 
  -4   0   8    0.46    0.06 
  -4   0   8    0.56    0.07 
  -4   0   7   -0.02    0.03 
  -4   0   7    0.05    0.04 
   4   0  -7    0.01    0.05 
  -4   0   6    1.46    0.08 
  -4   0   6    1.53    0.09 
   4   0  -6    1.60    0.10 
  -4   0   5   -0.03    0.03 
   4   0  -5    0.03    0.04 
  -4   0   5    0.00    0.03 
  -4   0   4    9.90    0.21 
  -4   0   4    9.85    0.22 
   4   0  -4    9.70    0.22 
  -4   0   3   -0.02    0.03 
  -4   0   3   -0.03    0.02 
   4   0  -3   -0.02    0.03 
  -4   0   3    0.04    0.03 
  -4   0   2   27.37    0.47 
   4   0  -2   27.01    0.49 
  -4   0   2   27.66    0.46 
   4   0  -2   27.30    0.47 
  -4   0   1    0.01    0.02 
   4   0  -1    0.03    0.03 
   4   0  -1    0.00    0.02 
  -4   0   1    0.05    0.03 
   4   0   0  134.11    2.19 
  -4   0   0  134.27    2.15 
  -4   0   0  134.11    2.17 
   4   0   0  132.62    2.26 
  -4   0  -1    0.28    0.03 
   4   0   1    0.21    0.04 
   4   0   1    0.19    0.03 
  -4   0  -1    0.28    0.05 
   4   0   2  839.95   13.68 
  -4   0  -2  846.00   13.82 
   4   0   2  845.04   14.11 
  -4   0  -2  862.28   13.31 
   4   0   3    0.18    0.04 
  -4   0  -3    0.23    0.05 
   4   0   3    0.22    0.04 
   4   0   4   66.62    1.13 
   4   0   4   67.23    1.17 
  -4   0  -4   66.98    1.15 
   4   0   5    0.02    0.03 
  -4   0  -5    0.06    0.04 
   4   0   5    0.05    0.04 
  -4   0  -6    1.11    0.09 
   4   0   6    1.08    0.09 
  -4   0  -6    1.16    0.09 
  -4   0  -7   -0.03    0.05 
  -4   0  -7    0.01    0.05 
   4   0   7   -0.03    0.04 
  -4   0  -8    2.06    0.14 
   4   0   8    2.13    0.13 
  -4   0  -8    1.90    0.13 
   4   0   9    0.03    0.06 
  -4   0  -9    0.01    0.07 
  -4   0  -9   -0.04    0.05 
  -4   0 -10    0.10    0.07 
  -4   0 -10    0.04    0.08 
   4   0  10   -0.01    0.05 
  -4   0 -11    0.06    0.08 
   4   0  11   -0.06    0.05 
  -4   0 -11    0.03    0.06 
   4   0  12    0.35    0.09 
  -4   0 -12    0.34    0.10 
  -4   0 -13    0.08    0.10 
   4   0  13    0.06    0.07 
   4   0  14    3.11    0.21 
  -4   0 -14    3.69    0.25 
  -4   0 -15    0.53    0.14 
   4   0  15    0.03    0.08 
   4   1 -16    1.49    0.20 
  -4   1  16    1.13    0.16 
  -4  -1  16    1.22    0.16 
   4  -1 -16    1.20    0.16 
   4   1 -15    0.20    0.11 
  -4   1  15    0.30    0.10 
  -4  -1  15    0.22    0.09 
   4  -1 -15    0.31    0.12 
  -4   1  14    1.03    0.13 
   4   1 -14    1.33    0.16 
  -4  -1  14    1.24    0.15 
   4  -1 -14    1.24    0.15 
   4   1 -13    0.52    0.11 
  -4   1  13    0.56    0.10 
  -4  -1  13    0.47    0.10 
   4  -1 -13    0.81    0.13 
   4   1 -12    0.74    0.12 
  -4   1  12    0.69    0.10 
  -4  -1  12    0.62    0.08 
   4  -1 -12    0.68    0.12 
  -4  -1  12    0.65    0.10 
  -4   1  11    4.64    0.17 
  -4   1  11    4.73    0.21 
   4   1 -11    4.79    0.22 
   4  -1 -11    4.91    0.22 
  -4  -1  11    5.02    0.18 
  -4  -1  11    4.60    0.20 
  -4   1  10    0.05    0.04 
   4   1 -10    0.20    0.08 
  -4   1  10    0.02    0.05 
  -4  -1  10    0.01    0.04 
   4  -1 -10    0.07    0.07 
  -4  -1  10    0.04    0.05 
  -4   1   9    4.55    0.15 
   4   1  -9    4.66    0.19 
  -4   1   9    4.88    0.18 
  -4  -1   9    4.44    0.16 
  -4  -1   9    4.66    0.18 
   4  -1  -9    4.67    0.19 
   4   1  -8    0.02    0.06 
  -4   1   8    0.01    0.03 
  -4   1   8    0.01    0.04 
  -4  -1   8   -0.02    0.03 
   4  -1  -8    0.05    0.06 
  -4  -1   8    0.00    0.04 
  -4   1   7    2.10    0.11 
  -4   1   7    2.31    0.10 
   4   1  -7    2.21    0.12 
  -4  -1   7    2.10    0.10 
  -4  -1   7    2.03    0.11 
   4  -1  -7    2.14    0.12 
  -4   1   6    6.72    0.17 
   4   1  -6    6.70    0.19 
  -4  -1   6    6.72    0.18 
  -4  -1   6    6.31    0.17 
   4  -1  -6    6.84    0.19 
  -4   1   5    0.20    0.04 
  -4   1   5    0.32    0.04 
   4   1  -5    0.26    0.05 
   4  -1  -5    0.27    0.05 
  -4  -1   5    0.43    0.05 
  -4  -1   5    0.32    0.04 
  -4   1   4    0.91    0.06 
  -4   1   4    0.98    0.07 
  -4   1   4    1.04    0.04 
   4   1  -4    0.98    0.08 
   4  -1  -4    1.08    0.07 
  -4  -1   4    0.86    0.06 
  -4  -1   4    1.10    0.07 
  -4  -1   4    0.96    0.04 
  -4   1   3   22.35    0.38 
   4   1  -3   21.88    0.41 
   4  -1  -3   21.74    0.39 
   4  -1  -3   22.32    0.42 
  -4  -1   3   21.78    0.40 
  -4  -1   3   21.89    0.40 
  -4  -1   3   22.77    0.38 
   4   1  -2    0.65    0.06 
   4   1  -2    0.80    0.06 
  -4   1   2    0.80    0.05 
  -4  -1   2    0.73    0.05 
   4  -1  -2    0.77    0.06 
   4  -1  -2    0.83    0.05 
  -4  -1   2    0.81    0.05 
  -4   1   1    8.06    0.17 
   4   1  -1    8.20    0.18 
   4   1  -1    8.38    0.17 
  -4   1   1    8.14    0.17 
   4  -1  -1    7.87    0.18 
  -4  -1   1    8.12    0.17 
  -4  -1   1    8.14    0.17 
   4  -1  -1    8.22    0.15 
   4   1   0   89.34    1.47 
   4   1   0   90.39    1.50 
  -4   1   0   89.21    1.44 
  -4   1   0   88.89    1.48 
  -4  -1   0   90.31    1.48 
   4  -1   0   88.91    1.51 
   4  -1   0   90.06    1.45 
  -4  -1   0   92.24    1.43 
  -4   1  -1  318.11    5.20 
   4   1   1  310.91    5.20 
   4   1   1  319.80    5.33 
  -4   1  -1  323.32    5.10 
  -4  -1  -1  321.99    5.25 
   4  -1   1  323.71    5.13 
  -4  -1  -1  320.71    5.04 
   4  -1   1  308.97    5.36 
   4   1   2    4.39    0.12 
  -4   1  -2    4.61    0.14 
  -4   1  -2    4.61    0.10 
   4   1   2    4.53    0.13 
   4  -1   2    4.61    0.11 
  -4  -1  -2    4.38    0.13 
   4   1   3   18.09    0.36 
   4   1   3   17.64    0.35 
  -4   1  -3   17.25    0.35 
   4  -1   3   17.39    0.36 
   4  -1   3   18.17    0.34 
  -4  -1  -3   17.60    0.35 
   4  -1   3   18.25    0.31 
   4   1   4    4.79    0.15 
  -4   1  -4    5.12    0.14 
  -4   1  -4    5.19    0.16 
   4   1   4    4.80    0.15 
   4  -1   4    5.06    0.11 
  -4  -1  -4    4.74    0.15 
   4  -1   4    4.71    0.15 
  -4   1  -5    2.09    0.11 
   4   1   5    2.28    0.11 
   4   1   5    2.17    0.11 
  -4   1  -5    2.14    0.10 
   4  -1   5    1.95    0.10 
  -4  -1  -5    2.18    0.11 
   4  -1   5    2.12    0.07 
   4   1   6    0.27    0.05 
  -4   1  -6    0.22    0.06 
  -4   1  -6    0.35    0.06 
   4   1   6    0.30    0.06 
  -4  -1  -6    0.39    0.06 
   4  -1   6    0.31    0.03 
   4  -1   6    0.33    0.06 
  -4   1  -7    0.46    0.07 
  -4   1  -7    0.31    0.07 
   4   1   7    0.54    0.07 
  -4  -1  -7    0.43    0.07 
   4  -1   7    0.42    0.07 
  -4  -1  -7    0.44    0.08 
  -4   1  -8    2.61    0.14 
   4   1   8    2.61    0.14 
  -4   1  -8    2.84    0.15 
  -4  -1  -8    2.24    0.14 
  -4  -1  -8    2.31    0.13 
   4  -1   8    2.59    0.14 
  -4   1  -9    0.54    0.08 
  -4   1  -9    0.41    0.09 
   4   1   9    0.45    0.08 
  -4  -1  -9    0.35    0.09 
  -4  -1  -9    0.46    0.08 
   4  -1   9    0.34    0.07 
  -4   1 -10    3.59    0.20 
   4   1  10    3.36    0.18 
  -4   1 -10    3.46    0.17 
  -4  -1 -10    3.17    0.17 
   4  -1  10    3.37    0.18 
  -4  -1 -10    3.63    0.20 
  -4   1 -11    2.64    0.19 
  -4   1 -11    2.79    0.17 
   4   1  11    3.13    0.18 
  -4  -1 -11    3.03    0.17 
   4  -1  11    2.77    0.18 
  -4  -1 -11    3.30    0.20 
  -4   1 -12    1.29    0.15 
   4   1  12    1.12    0.14 
   4  -1  12    1.11    0.13 
  -4  -1 -12    1.17    0.14 
   4   1  13    0.09    0.08 
  -4   1 -13    0.22    0.10 
   4  -1  13   -0.01    0.06 
  -4  -1 -13   -0.07    0.09 
   4   1  14    2.21    0.19 
  -4   1 -14    2.45    0.22 
  -4  -1 -14    2.06    0.21 
   4  -1  14    1.86    0.19 
   4   1  15    0.71    0.14 
  -4   1 -15    1.15    0.17 
  -4  -1 -15    0.82    0.16 
   4  -1  15    0.94    0.14 
   4   2 -16    0.22    0.13 
  -4   2  16    0.27    0.10 
  -4  -2  16    0.11    0.09 
   4  -2 -16    0.17    0.12 
  -4   2  15    0.42    0.11 
   4   2 -15    0.45    0.13 
   4  -2 -15    0.52    0.13 
  -4  -2  15    0.23    0.09 
  -4   2  14    0.23    0.09 
   4   2 -14   -0.03    0.10 
  -4  -2  14    0.26    0.09 
   4  -2 -14    0.22    0.10 
  -4   2  13    1.07    0.13 
   4   2 -13    0.99    0.14 
  -4  -2  13    1.36    0.14 
   4  -2 -13    1.27    0.15 
  -4   2  12    4.87    0.22 
   4   2 -12    4.82    0.23 
   4  -2 -12    4.87    0.23 
  -4  -2  12    4.93    0.19 
  -4  -2  12    4.99    0.21 
  -4   2  11   14.44    0.34 
  -4   2  11   13.87    0.39 
   4   2 -11   14.94    0.40 
   4  -2 -11   13.85    0.38 
  -4  -2  11   14.72    0.38 
  -4  -2  11   15.26    0.35 
  -4   2  10    3.58    0.17 
  -4   2  10    3.55    0.14 
   4   2 -10    3.24    0.18 
  -4  -2  10    3.49    0.15 
   4  -2 -10    3.43    0.18 
  -4  -2  10    3.23    0.16 
   4   2  -9    0.04    0.07 
  -4   2   9    0.05    0.04 
  -4   2   9    0.03    0.05 
  -4  -2   9    0.01    0.04 
  -4  -2   9    0.00    0.04 
   4  -2  -9   -0.01    0.06 
  -4   2   8    2.76    0.12 
   4   2  -8    2.85    0.08 
  -4   2   8    2.70    0.13 
   4   2  -8    2.60    0.15 
  -4  -2   8    2.72    0.13 
  -4  -2   8    2.89    0.12 
   4  -2  -8    2.86    0.08 
   4  -2  -8    2.97    0.14 
   4   2  -7   -0.06    0.05 
  -4   2   7    0.01    0.04 
   4   2  -7    0.01    0.02 
  -4   2   7    0.03    0.03 
  -4  -2   7    0.01    0.03 
  -4  -2   7    0.03    0.04 
   4  -2  -7    0.02    0.02 
   4  -2  -7    0.00    0.05 
   4   2  -6    0.90    0.04 
   4   2  -6    0.87    0.09 
  -4   2   6    0.99    0.07 
  -4   2   6    0.85    0.08 
  -4  -2   6    0.85    0.07 
   4  -2  -6    0.92    0.08 
  -4  -2   6    0.80    0.07 
   4  -2  -6    0.99    0.05 
   4   2  -5    4.70    0.16 
  -4   2   5    4.75    0.15 
  -4   2   5    4.94    0.14 
  -4   2   5    4.99    0.11 
   4   2  -5    5.15    0.11 
  -4  -2   5    4.86    0.14 
  -4  -2   5    4.92    0.14 
   4  -2  -5    4.72    0.14 
   4   2  -4    0.04    0.02 
   4   2  -4   -0.02    0.04 
  -4   2   4    0.01    0.03 
  -4   2   4    0.02    0.02 
  -4   2   4    0.04    0.03 
  -4  -2   4    0.01    0.03 
  -4  -2   4   -0.01    0.02 
   4  -2  -4    0.03    0.03 
  -4   2   3    0.63    0.06 
   4   2  -3    0.63    0.04 
   4   2  -3    0.58    0.06 
  -4   2   3    0.61    0.05 
  -4  -2   3    0.63    0.05 
  -4  -2   3    0.61    0.06 
   4  -2  -3    0.66    0.07 
   4  -2  -3    0.61    0.05 
   4   2  -2    0.02    0.03 
  -4   2   2    0.00    0.03 
   4   2  -2    0.02    0.04 
  -4   2   2    0.03    0.03 
   4  -2  -2    0.02    0.02 
  -4  -2   2   -0.01    0.02 
   4  -2  -2    0.04    0.04 
  -4  -2   2    0.03    0.03 
   4   2  -1    3.06    0.08 
   4   2  -1    2.73    0.10 
  -4   2   1    2.93    0.10 
  -4   2   1    2.99    0.09 
   4  -2  -1    2.86    0.10 
  -4  -2   1    3.09    0.09 
  -4  -2   1    2.98    0.09 
  -4   2   0    3.33    0.11 
   4   2   0    3.20    0.10 
  -4   2   0    3.26    0.10 
   4   2   0    3.31    0.09 
  -4  -2   0    3.26    0.09 
   4  -2   0    3.16    0.11 
  -4  -2   0    3.16    0.10 
  -4   2  -1   43.16    0.69 
   4   2   1   41.73    0.73 
  -4   2  -1   41.50    0.73 
   4   2   1   42.61    0.73 
  -4   2  -1   42.49    0.71 
  -4  -2  -1   42.47    0.69 
   4  -2   1   42.48    0.75 
  -4  -2  -1   40.85    0.73 
   4   2   2    8.11    0.19 
  -4   2  -2    8.60    0.17 
   4   2   2    8.13    0.19 
   4  -2   2    8.43    0.18 
  -4  -2  -2    8.41    0.15 
  -4  -2  -2    7.88    0.20 
   4  -2   2    8.21    0.20 
   4   2   3    2.62    0.10 
  -4   2  -3    2.78    0.09 
  -4   2  -3    2.77    0.11 
   4   2   3    2.95    0.11 
  -4  -2  -3    2.90    0.11 
   4  -2   3    2.90    0.09 
   4  -2   3    2.71    0.11 
  -4   2  -4    4.24    0.13 
   4   2   4    4.08    0.13 
  -4   2  -4    3.84    0.14 
   4   2   4    3.95    0.13 
   4  -2   4    3.72    0.14 
  -4  -2  -4    4.13    0.14 
   4  -2   4    3.99    0.11 
   4   2   5    3.08    0.12 
  -4   2  -5    2.95    0.12 
  -4   2  -5    3.02    0.13 
   4   2   5    2.95    0.12 
   4  -2   5    3.13    0.10 
  -4  -2  -5    2.90    0.12 
   4  -2   5    3.07    0.13 
  -4   2  -6    0.40    0.07 
   4   2   6    0.29    0.06 
  -4   2  -6    0.60    0.07 
   4   2   6    0.41    0.06 
   4  -2   6    0.43    0.07 
  -4  -2  -6    0.48    0.07 
   4  -2   6    0.44    0.05 
  -4   2  -7    0.34    0.07 
   4   2   7    0.27    0.06 
  -4   2  -7    0.34    0.07 
   4   2   7    0.41    0.07 
   4  -2   7    0.33    0.07 
   4  -2   7    0.36    0.05 
  -4  -2  -7    0.46    0.07 
  -4   2  -8    0.65    0.09 
   4   2   8    0.69    0.09 
  -4   2  -8    0.60    0.09 
   4   2   8    0.84    0.10 
  -4  -2  -8    0.43    0.09 
  -4  -2  -8    0.67    0.09 
   4  -2   8    0.53    0.08 
  -4   2  -9    0.18    0.07 
   4   2   9    0.26    0.07 
  -4   2  -9    0.34    0.09 
   4  -2   9    0.29    0.08 
  -4  -2  -9    0.20    0.07 
  -4  -2  -9    0.33    0.09 
   4   2  10    0.85    0.11 
  -4   2 -10    1.14    0.12 
  -4   2 -10    0.84    0.11 
  -4  -2 -10    0.83    0.10 
  -4  -2 -10    0.87    0.12 
   4  -2  10    0.95    0.12 
   4   2  11    0.32    0.09 
  -4   2 -11    0.18    0.09 
  -4   2 -11    0.11    0.07 
  -4  -2 -11    0.28    0.08 
  -4  -2 -11    0.24    0.09 
   4  -2  11    0.33    0.08 
   4   2  12    0.18    0.08 
  -4   2 -12    0.10    0.09 
  -4  -2 -12   -0.01    0.08 
   4  -2  12    0.10    0.07 
  -4   2 -13    0.32    0.11 
   4   2  13    0.24    0.09 
  -4  -2 -13    0.35    0.11 
   4  -2  13    0.13    0.08 
  -4   2 -14    2.20    0.22 
   4   2  14    1.78    0.18 
  -4  -2 -14    1.85    0.21 
   4  -2  14    1.82    0.18 
  -4   2 -15    8.05    0.36 
  -4  -2 -15    8.60    0.38 
   4   3 -16    4.00    0.29 
  -4   3  16    3.96    0.25 
   4  -3 -16    4.19    0.27 
  -4  -3  16    3.81    0.24 
  -4   3  15    3.24    0.22 
   4   3 -15    3.01    0.24 
   4  -3 -15    3.19    0.24 
  -4  -3  15    2.98    0.20 
  -4   3  14    1.03    0.14 
   4   3 -14    0.91    0.15 
   4  -3 -14    0.96    0.14 
  -4  -3  14    0.91    0.12 
  -4   3  13    2.01    0.17 
   4   3 -13    1.79    0.20 
  -4  -3  13    2.14    0.16 
  -4  -3  13    2.19    0.14 
   4  -3 -13    2.33    0.18 
   4   3 -12    3.61    0.22 
  -4   3  12    3.82    0.20 
  -4  -3  12    3.69    0.18 
  -4  -3  12    3.56    0.17 
   4  -3 -12    3.70    0.21 
  -4   3  11    0.21    0.08 
  -4   3  11    0.24    0.06 
   4   3 -11    0.32    0.10 
   4  -3 -11    0.23    0.09 
  -4  -3  11    0.30    0.07 
  -4  -3  11    0.25    0.06 
  -4   3  10    1.98    0.11 
   4   3 -10    1.71    0.16 
  -4   3  10    1.96    0.14 
  -4  -3  10    1.56    0.12 
   4  -3 -10    1.56    0.14 
  -4  -3  10    1.94    0.12 
  -4   3   9    2.42    0.14 
  -4   3   9    2.43    0.12 
   4   3  -9    2.70    0.17 
  -4  -3   9    2.20    0.12 
  -4  -3   9    2.51    0.13 
   4  -3  -9    2.16    0.15 
   4   3  -8    0.50    0.05 
  -4   3   8    0.42    0.07 
  -4   3   8    0.43    0.06 
   4   3  -8    0.42    0.09 
   4  -3  -8    0.49    0.05 
  -4  -3   8    0.35    0.06 
  -4  -3   8    0.45    0.06 
   4  -3  -8    0.34    0.07 
  -4   3   7   13.36    0.30 
   4   3  -7   12.89    0.33 
  -4   3   7   13.43    0.33 
   4   3  -7   13.49    0.26 
  -4  -3   7   13.04    0.30 
   4  -3  -7   13.54    0.27 
   4  -3  -7   13.68    0.31 
  -4  -3   7   13.14    0.30 
   4   3  -6    3.34    0.15 
  -4   3   6    3.43    0.10 
   4   3  -6    3.61    0.10 
  -4   3   6    3.20    0.13 
  -4   3   6    3.41    0.12 
  -4  -3   6    3.23    0.12 
  -4  -3   6    3.29    0.13 
   4  -3  -6    3.33    0.13 
  -4   3   5    1.45    0.08 
  -4   3   5    1.47    0.07 
   4   3  -5    1.59    0.10 
   4   3  -5    1.62    0.07 
  -4   3   5    1.34    0.09 
  -4  -3   5    1.51    0.07 
   4  -3  -5    1.38    0.08 
  -4  -3   5    1.65    0.09 
  -4   3   4    3.12    0.12 
  -4   3   4    3.27    0.10 
   4   3  -4    3.34    0.10 
  -4   3   4    3.25    0.11 
   4   3  -4    3.16    0.13 
  -4  -3   4    3.34    0.12 
  -4  -3   4    3.24    0.09 
   4  -3  -4    3.12    0.10 
  -4   3   3    3.13    0.11 
   4   3  -3    3.15    0.12 
  -4   3   3    3.16    0.10 
   4   3  -3    3.00    0.10 
   4  -3  -3    3.07    0.09 
   4  -3  -3    3.13    0.12 
  -4  -3   3    3.28    0.11 
  -4  -3   3    3.21    0.08 
   4   3  -2    0.19    0.03 
   4   3  -2    0.08    0.04 
  -4   3   2    0.20    0.04 
  -4   3   2    0.19    0.04 
   4   3  -2    0.10    0.03 
   4  -3  -2    0.15    0.03 
  -4  -3   2    0.09    0.04 
   4  -3  -2    0.13    0.04 
   4   3  -1   33.48    0.60 
  -4   3   1   33.76    0.60 
  -4   3   1   34.01    0.60 
   4   3  -1   35.11    0.57 
   4   3  -1   34.05    0.61 
  -4  -3   1   34.78    0.59 
   4  -3  -1   33.24    0.62 
  -4   3   0    2.61    0.10 
  -4   3   0    2.93    0.10 
   4   3   0    3.00    0.08 
  -4  -3   0    2.76    0.10 
   4  -3   0    2.80    0.11 
  -4  -3   0    2.94    0.09 
   4   3   1    0.29    0.03 
  -4   3  -1    0.30    0.03 
   4   3   1    0.35    0.05 
  -4   3  -1    0.27    0.04 
  -4   3  -1    0.27    0.05 
  -4  -3  -1    0.25    0.04 
  -4  -3  -1    0.35    0.04 
   4  -3   1    0.37    0.05 
   4   3   2    0.26    0.04 
   4   3   2    0.24    0.04 
  -4   3  -2    0.23    0.03 
  -4   3  -2    0.14    0.04 
   4  -3   2    0.28    0.04 
  -4  -3  -2    0.19    0.04 
  -4  -3  -2    0.28    0.03 
   4  -3   2    0.19    0.04 
  -4   3  -3    3.38    0.13 
   4   3   3    3.25    0.11 
   4   3   3    3.34    0.12 
  -4   3  -3    3.26    0.10 
   4  -3   3    3.17    0.12 
  -4  -3  -3    3.19    0.08 
  -4  -3  -3    3.42    0.13 
   4  -3   3    3.25    0.11 
  -4   3  -4    1.14    0.08 
  -4   3  -4    1.26    0.09 
   4   3   4    1.19    0.08 
   4   3   4    1.12    0.08 
   4  -3   4    1.30    0.08 
   4  -3   4    1.25    0.09 
  -4  -3  -4    1.35    0.09 
  -4  -3  -4    1.18    0.04 
  -4   3  -5    5.51    0.18 
   4   3   5    5.13    0.17 
  -4   3  -5    5.64    0.16 
   4   3   5    5.47    0.17 
   4  -3   5    5.65    0.15 
   4  -3   5    5.54    0.18 
  -4  -3  -5    5.55    0.18 
   4   3   6    4.52    0.17 
  -4   3  -6    4.86    0.17 
   4   3   6    4.87    0.17 
  -4   3  -6    4.90    0.17 
   4  -3   6    4.73    0.17 
   4  -3   6    5.02    0.15 
  -4  -3  -6    4.94    0.18 
   4   3   7    0.05    0.05 
  -4   3  -7    0.06    0.06 
  -4   3  -7    0.06    0.06 
   4   3   7    0.07    0.05 
   4  -3   7    0.08    0.04 
  -4  -3  -7    0.05    0.05 
   4  -3   7    0.12    0.05 
  -4   3  -8    4.96    0.20 
   4   3   8    4.97    0.20 
   4   3   8    5.10    0.20 
  -4   3  -8    4.99    0.20 
   4  -3   8    5.36    0.20 
  -4  -3  -8    5.37    0.20 
   4   3   9    0.15    0.07 
   4   3   9    0.24    0.07 
  -4   3  -9    0.13    0.08 
  -4   3  -9    0.17    0.07 
  -4  -3  -9    0.18    0.08 
  -4  -3  -9    0.23    0.07 
   4  -3   9    0.23    0.07 
  -4   3 -10    1.22    0.12 
  -4   3 -10    1.13    0.13 
   4   3  10    1.14    0.13 
   4  -3  10    0.97    0.12 
  -4  -3 -10    1.29    0.13 
  -4  -3 -10    1.14    0.13 
  -4   3 -11    0.08    0.08 
  -4   3 -11    0.19    0.08 
   4   3  11    0.26    0.08 
  -4  -3 -11    0.12    0.07 
   4  -3  11    0.17    0.08 
  -4  -3 -11    0.29    0.10 
   4   3  12    0.08    0.08 
  -4   3 -12    0.18    0.09 
  -4  -3 -12    0.12    0.09 
   4  -3  12    0.05    0.07 
  -4   3 -13    0.52    0.12 
   4   3  13    0.27    0.10 
  -4  -3 -13    0.37    0.11 
   4  -3  13    0.54    0.11 
  -4   3 -14   -0.13    0.10 
   4   3  14    0.24    0.10 
   4  -3  14    0.07    0.08 
  -4  -3 -14    0.14    0.11 
  -4   3 -15    1.40    0.19 
   4   4 -16    0.09    0.13 
  -4   4  16    0.03    0.09 
   4  -4 -16    0.19    0.11 
  -4  -4  16    0.00    0.08 
   4   4 -15    0.18    0.12 
  -4   4  15    0.09    0.09 
  -4  -4  15    0.03    0.07 
   4  -4 -15   -0.06    0.10 
  -4   4  14    0.80    0.13 
   4   4 -14    0.47    0.13 
  -4  -4  14    0.82    0.11 
   4  -4 -14    0.61    0.13 
  -4   4  13    0.05    0.08 
   4   4 -13    0.13    0.11 
  -4  -4  13    0.07    0.06 
  -4  -4  13    0.14    0.07 
   4  -4 -13    0.19    0.09 
  -4   4  12    0.30    0.09 
   4   4 -12    0.37    0.11 
   4  -4 -12    0.45    0.10 
  -4  -4  12    0.39    0.08 
  -4  -4  12    0.61    0.09 
  -4   4  11    8.33    0.25 
   4   4 -11    7.82    0.29 
  -4   4  11    8.05    0.28 
  -4  -4  11    8.40    0.26 
   4  -4 -11    7.61    0.27 
  -4  -4  11    7.77    0.26 
  -4   4  10    0.33    0.08 
  -4   4  10    0.45    0.07 
   4   4 -10    0.38    0.10 
  -4  -4  10    0.44    0.07 
   4  -4 -10    0.37    0.09 
  -4  -4  10    0.35    0.07 
   4   4  -9    1.10    0.13 
  -4   4   9    1.19    0.12 
  -4   4   9    0.98    0.09 
   4  -4  -9    1.06    0.11 
  -4  -4   9    1.10    0.10 
  -4  -4   9    1.03    0.09 
  -4   4   8    0.99    0.10 
   4   4  -8    1.08    0.12 
   4   4  -8    0.99    0.07 
  -4   4   8    0.93    0.08 
   4  -4  -8    0.89    0.10 
   4  -4  -8    1.04    0.08 
  -4  -4   8    0.74    0.08 
  -4  -4   8    0.99    0.09 
  -4   4   7   18.58    0.39 
   4   4  -7   19.13    0.36 
   4   4  -7   19.10    0.43 
  -4   4   7   18.88    0.37 
  -4   4   7   17.84    0.42 
  -4  -4   7   18.43    0.40 
  -4  -4   7   18.82    0.39 
   4  -4  -7   18.34    0.40 
   4   4  -6   12.10    0.30 
  -4   4   6   12.03    0.28 
  -4   4   6   11.69    0.26 
  -4   4   6   12.31    0.30 
   4   4  -6   11.98    0.25 
   4  -4  -6   11.90    0.28 
  -4  -4   6   12.25    0.26 
  -4  -4   6   11.93    0.29 
   4   4  -5    0.23    0.06 
   4   4  -5    0.28    0.04 
  -4   4   5    0.25    0.04 
  -4   4   5    0.25    0.05 
  -4   4   5    0.26    0.05 
  -4  -4   5    0.33    0.06 
  -4  -4   5    0.30    0.04 
   4  -4  -5    0.23    0.05 
   4   4  -4    4.86    0.17 
  -4   4   4    4.70    0.15 
   4   4  -4    4.97    0.14 
  -4   4   4    4.93    0.14 
  -4  -4   4    4.93    0.12 
   4  -4  -4    4.58    0.15 
  -4  -4   4    4.76    0.15 
   4  -4  -4    4.76    0.13 
   4   4  -3    0.21    0.04 
   4   4  -3    0.21    0.05 
  -4   4   3    0.16    0.04 
  -4   4   3    0.22    0.04 
   4  -4  -3    0.19    0.05 
  -4  -4   3    0.15    0.04 
  -4   4   2    0.36    0.05 
  -4   4   2    0.40    0.05 
   4   4  -2    0.43    0.06 
  -4   4   2    0.43    0.04 
   4   4  -2    0.41    0.05 
   4  -4  -2    0.42    0.06 
  -4  -4   2    0.39    0.05 
   4   4  -1    0.29    0.05 
   4   4  -1    0.34    0.05 
  -4   4   1    0.36    0.05 
  -4   4   1    0.33    0.03 
  -4   4   1    0.29    0.05 
  -4  -4   1    0.42    0.05 
   4  -4  -1    0.33    0.05 
   4   4   0    0.55    0.06 
  -4   4   0    0.49    0.06 
   4   4   0    0.60    0.07 
   4   4   0    0.60    0.03 
  -4   4   0    0.60    0.06 
   4  -4   0    0.51    0.06 
  -4  -4   0    0.56    0.06 
  -4   4  -1    7.00    0.19 
  -4   4  -1    7.05    0.14 
   4   4   1    7.13    0.15 
   4   4   1    6.75    0.18 
   4  -4   1    6.95    0.18 
  -4  -4  -1    6.93    0.16 
  -4  -4  -1    6.73    0.18 
   4  -4   1    6.93    0.18 
   4   4   2    7.62    0.17 
  -4   4  -2    7.26    0.20 
  -4   4  -2    7.58    0.16 
  -4  -4  -2    7.51    0.17 
  -4  -4  -2    7.62    0.21 
   4  -4   2    7.56    0.19 
   4  -4   2    7.85    0.20 
  -4   4  -3    3.54    0.11 
   4   4   3    3.50    0.11 
   4   4   3    3.33    0.13 
  -4  -4  -3    3.51    0.10 
  -4  -4  -3    3.64    0.14 
   4  -4   3    3.50    0.12 
   4  -4   3    3.43    0.13 
  -4   4  -4    6.26    0.19 
   4   4   4    6.47    0.19 
   4   4   4    6.21    0.18 
  -4   4  -4    6.40    0.17 
   4  -4   4    6.32    0.19 
  -4  -4  -4    6.61    0.20 
   4  -4   4    6.22    0.17 
  -4  -4  -4    6.16    0.14 
   4   4   5    2.23    0.12 
   4   4   5    2.28    0.11 
  -4   4  -5    2.34    0.11 
  -4   4  -5    2.12    0.12 
   4  -4   5    2.21    0.11 
  -4  -4  -5    2.39    0.08 
  -4  -4  -5    2.28    0.12 
   4  -4   5    2.17    0.12 
  -4   4  -6    0.61    0.08 
   4   4   6    0.55    0.07 
  -4   4  -6    0.67    0.08 
   4   4   6    0.58    0.08 
   4  -4   6    0.68    0.08 
   4  -4   6    0.66    0.07 
  -4  -4  -6    0.84    0.09 
   4   4   7    0.18    0.06 
  -4   4  -7    0.18    0.06 
   4   4   7    0.21    0.06 
  -4   4  -7    0.16    0.07 
  -4  -4  -7    0.26    0.07 
   4  -4   7    0.18    0.06 
   4  -4   7    0.22    0.06 
   4   4   8    0.03    0.06 
  -4   4  -8    0.18    0.07 
   4   4   8    0.19    0.07 
  -4   4  -8    0.10    0.06 
  -4  -4  -8    0.20    0.07 
   4  -4   8    0.08    0.06 
   4   4   9    0.18    0.07 
  -4   4  -9    0.33    0.08 
   4   4   9    0.01    0.06 
  -4   4  -9    0.14    0.07 
   4  -4   9    0.24    0.07 
  -4  -4  -9    0.13    0.07 
  -4   4 -10    0.05    0.06 
  -4   4 -10    0.06    0.08 
   4   4  10    0.12    0.07 
  -4  -4 -10    0.10    0.08 
  -4  -4 -10    0.07    0.07 
   4  -4  10    0.05    0.06 
  -4   4 -11    1.16    0.13 
   4   4  11    1.38    0.15 
  -4   4 -11    1.34    0.14 
  -4  -4 -11    1.17    0.13 
   4  -4  11    1.13    0.13 
  -4  -4 -11    1.14    0.14 
   4   4  12    0.11    0.08 
  -4   4 -12    0.27    0.10 
  -4  -4 -12    0.43    0.11 
   4  -4  12    0.02    0.07 
  -4   4 -13    1.47    0.17 
   4   4  13    1.31    0.15 
   4  -4  13    1.68    0.17 
  -4  -4 -13    1.51    0.17 
  -4   4 -14    1.74    0.19 
   4   4  14    2.05    0.20 
   4  -4  14    1.65    0.19 
  -4  -4 -14    2.01    0.22 
   4  -5 -16    0.37    0.15 
   4   5 -15   -0.01    0.13 
  -4   5  15    0.05    0.09 
   4  -5 -15   -0.15    0.09 
   4   5 -14    0.03    0.11 
  -4   5  14    0.22    0.09 
  -4  -5  14    0.15    0.08 
   4  -5 -14    0.23    0.11 
  -4   5  13   -0.03    0.07 
   4   5 -13    0.02    0.10 
   4  -5 -13    0.00    0.08 
  -4  -5  13   -0.10    0.06 
  -4  -5  13    0.03    0.06 
  -4   5  12    0.97    0.13 
   4   5 -12    1.09    0.15 
   4  -5 -12    1.09    0.13 
  -4  -5  12    1.08    0.12 
  -4  -5  12    1.09    0.12 
  -4   5  11    5.96    0.24 
   4   5 -11    5.61    0.26 
  -4  -5  11    5.94    0.22 
   4  -5 -11    5.77    0.24 
  -4  -5  11    5.38    0.22 
   4   5 -10    0.25    0.10 
  -4   5  10    0.25    0.06 
  -4   5  10    0.31    0.08 
  -4  -5  10    0.22    0.07 
   4  -5 -10    0.14    0.08 
  -4  -5  10    0.29    0.07 
   4   5  -9    0.25    0.09 
  -4   5   9    0.26    0.07 
  -4   5   9    0.24    0.06 
   4  -5  -9    0.21    0.08 
  -4  -5   9    0.25    0.07 
  -4  -5   9    0.23    0.06 
  -4   5   8    1.89    0.13 
   4   5  -8    1.85    0.16 
  -4   5   8    1.91    0.11 
   4   5  -8    1.97    0.10 
   4  -5  -8    1.92    0.13 
  -4  -5   8    1.86    0.13 
  -4  -5   8    2.17    0.11 
   4  -5  -8    2.08    0.11 
  -4   5   7    1.06    0.08 
   4   5  -7    1.07    0.12 
  -4   5   7    1.13    0.09 
  -4   5   7    1.12    0.11 
   4   5  -7    0.97    0.08 
   4  -5  -7    0.95    0.10 
  -4  -5   7    1.21    0.08 
  -4  -5   7    0.94    0.10 
  -4   5   6    3.80    0.13 
  -4   5   6    4.07    0.16 
  -4   5   6    4.03    0.15 
   4   5  -6    3.79    0.13 
   4  -5  -6    3.95    0.15 
  -4  -5   6    3.90    0.12 
  -4  -5   6    3.88    0.16 
  -4   5   5    1.39    0.10 
   4   5  -5    1.39    0.12 
  -4   5   5    1.44    0.09 
   4   5  -5    1.20    0.08 
  -4   5   5    1.46    0.09 
   4  -5  -5    1.37    0.09 
  -4  -5   5    1.18    0.10 
  -4  -5   5    1.35    0.06 
   4   5  -4    0.07    0.04 
  -4   5   4    0.05    0.04 
  -4   5   4    0.10    0.04 
   4   5  -4    0.05    0.05 
  -4   5   4    0.05    0.03 
  -4  -5   4    0.08    0.02 
   4  -5  -4    0.11    0.05 
  -4  -5   4    0.00    0.04 
   4   5  -3    3.14    0.12 
  -4   5   3    3.34    0.13 
  -4   5   3    3.06    0.10 
   4   5  -3    3.23    0.13 
  -4   5   3    2.98    0.12 
   4  -5  -3    2.94    0.12 
  -4  -5   3    2.99    0.12 
  -4   5   2    5.44    0.12 
   4   5  -2    5.33    0.16 
   4   5  -2    5.56    0.17 
  -4   5   2    5.23    0.16 
  -4   5   2    5.15    0.16 
  -4  -5   2    5.48    0.16 
   4  -5  -2    5.31    0.16 
   4   5  -1    1.12    0.08 
  -4   5   1    1.18    0.09 
   4   5  -1    1.22    0.08 
  -4   5   1    1.17    0.05 
  -4   5   1    1.05    0.08 
   4  -5  -1    1.28    0.09 
  -4  -5   1    1.27    0.08 
  -4   5   0    5.86    0.12 
  -4   5   0    5.54    0.17 
   4   5   0    5.67    0.17 
   4   5   0    5.81    0.17 
   4  -5   0    5.59    0.17 
   4  -5   0    5.70    0.17 
  -4  -5   0    5.69    0.16 
  -4   5  -1    4.50    0.16 
   4   5   1    4.45    0.15 
   4   5   1    4.97    0.11 
  -4   5  -1    4.72    0.11 
   4   5   1    4.68    0.16 
   4  -5   1    4.84    0.16 
  -4  -5  -1    4.76    0.16 
  -4  -5  -1    4.74    0.14 
   4  -5   1    4.89    0.15 
   4   5   2   13.47    0.27 
  -4   5  -2   13.18    0.25 
  -4   5  -2   12.86    0.31 
   4   5   2   13.13    0.30 
   4  -5   2   13.07    0.30 
   4  -5   2   12.89    0.29 
  -4  -5  -2   12.91    0.27 
  -4  -5  -2   13.21    0.31 
   4   5   3   17.76    0.39 
  -4   5  -3   17.28    0.39 
  -4   5  -3   18.11    0.34 
   4   5   3   17.94    0.36 
  -4  -5  -3   18.05    0.34 
   4  -5   3   17.56    0.37 
   4  -5   3   18.26    0.38 
  -4  -5  -3   17.81    0.39 
  -4   5  -4    1.60    0.09 
   4   5   4    1.57    0.11 
   4   5   4    1.67    0.09 
  -4   5  -4    1.56    0.11 
   4  -5   4    1.41    0.10 
  -4  -5  -4    1.47    0.08 
  -4  -5  -4    1.55    0.11 
   4  -5   4    1.61    0.10 
  -4   5  -5    3.11    0.15 
   4   5   5    3.17    0.15 
   4   5   5    2.87    0.13 
  -4   5  -5    3.31    0.13 
  -4  -5  -5    2.78    0.14 
  -4  -5  -5    3.01    0.10 
   4  -5   5    2.99    0.13 
   4  -5   5    3.13    0.14 
   4   5   6    3.31    0.15 
  -4   5  -6    3.34    0.16 
  -4   5  -6    3.54    0.15 
   4   5   6    3.19    0.15 
   4  -5   6    3.09    0.15 
  -4  -5  -6    3.10    0.16 
   4  -5   6    3.35    0.14 
  -4   5  -7    8.40    0.26 
  -4   5  -7    8.68    0.25 
   4   5   7    8.05    0.26 
   4   5   7    8.33    0.25 
   4  -5   7    8.64    0.26 
  -4  -5  -7    8.46    0.26 
   4  -5   7    8.37    0.24 
  -4   5  -8    1.27    0.13 
   4   5   8    1.41    0.12 
   4   5   8    1.32    0.12 
  -4   5  -8    1.08    0.11 
   4  -5   8    1.40    0.12 
  -4  -5  -8    1.20    0.13 
   4  -5   8    1.38    0.11 
   4   5   9    3.00    0.18 
   4   5   9    3.70    0.18 
  -4   5  -9    3.64    0.18 
  -4   5  -9    3.57    0.18 
   4  -5   9    3.33    0.18 
  -4  -5  -9    3.29    0.18 
   4   5  10    0.35    0.09 
   4   5  10    0.35    0.09 
  -4   5 -10    0.39    0.09 
  -4   5 -10    0.27    0.10 
  -4  -5 -10    0.31    0.09 
   4  -5  10    0.44    0.09 
   4   5  11    1.37    0.15 
  -4   5 -11    1.58    0.16 
  -4   5 -11    1.38    0.15 
  -4  -5 -11    1.25    0.15 
   4  -5  11    1.50    0.15 
  -4  -5 -11    1.48    0.15 
  -4   5 -12    1.27    0.15 
   4   5  12    1.10    0.14 
  -4  -5 -12    1.01    0.14 
   4  -5  12    1.13    0.14 
   4   5  13    2.19    0.20 
   4  -5  13    2.07    0.18 
  -4  -5 -13    1.61    0.18 
   4   5  14    0.47    0.13 
  -4  -5 -14    0.71    0.15 
   4  -5  14    0.73    0.13 
  -4   6  15    0.11    0.10 
   4   6 -15    0.06    0.13 
   4  -6 -15    0.26    0.11 
   4   6 -14    0.84    0.16 
  -4   6  14    1.06    0.14 
   4  -6 -14    1.10    0.15 
  -4   6  13    1.23    0.15 
   4   6 -13    0.98    0.15 
  -4  -6  13    1.33    0.14 
   4  -6 -13    1.30    0.15 
   4   6 -12    0.19    0.11 
  -4   6  12    0.16    0.08 
  -4  -6  12    0.31    0.08 
   4  -6 -12    0.25    0.09 
  -4   6  11    0.07    0.07 
   4   6 -11    0.11    0.10 
  -4  -6  11    0.05    0.06 
   4  -6 -11    0.18    0.08 
   4   6 -10    0.33    0.11 
  -4   6  10    0.45    0.09 
  -4   6  10    0.42    0.08 
   4  -6 -10    0.37    0.09 
  -4  -6  10    0.32    0.08 
  -4   6   9    0.36    0.07 
   4   6  -9    0.28    0.10 
  -4   6   9    0.24    0.08 
   4  -6  -9    0.22    0.07 
  -4  -6   9    0.27    0.07 
  -4   6   8    0.34    0.08 
  -4   6   8    0.17    0.06 
   4   6  -8    0.25    0.09 
  -4   6   8    0.21    0.06 
   4   6  -8    0.33    0.06 
  -4  -6   8    0.26    0.07 
   4  -6  -8    0.23    0.07 
   4   6  -7    0.00    0.07 
   4   6  -7    0.02    0.04 
  -4   6   7   -0.06    0.05 
  -4   6   7   -0.03    0.04 
  -4   6   7    0.01    0.04 
   4  -6  -7    0.00    0.05 
  -4  -6   7    0.07    0.06 
  -4   6   6    3.18    0.14 
   4   6  -6    3.14    0.17 
  -4   6   6    3.34    0.15 
  -4   6   6    3.41    0.14 
   4   6  -6    3.21    0.13 
   4  -6  -6    3.29    0.14 
  -4  -6   6    3.16    0.16 
  -4   6   5    0.50    0.07 
  -4   6   5    0.36    0.06 
   4   6  -5    0.47    0.08 
  -4   6   5    0.47    0.07 
   4   6  -5    0.39    0.06 
   4  -6  -5    0.30    0.07 
  -4  -6   5    0.47    0.08 
   4   6  -4    4.01    0.14 
  -4   6   4    3.93    0.15 
  -4   6   4    3.85    0.13 
   4   6  -4    3.87    0.16 
  -4   6   4    3.63    0.15 
   4  -6  -4    3.85    0.15 
  -4  -6   4    3.77    0.15 
  -4   6   3    2.02    0.11 
  -4   6   3    1.75    0.11 
  -4   6   3    2.01    0.08 
   4   6  -3    2.14    0.12 
   4   6  -3    1.91    0.10 
   4  -6  -3    1.87    0.11 
  -4  -6   3    1.87    0.11 
  -4   6   2    0.85    0.08 
   4   6  -2    0.70    0.08 
  -4   6   2    0.89    0.09 
   4   6  -2    0.76    0.08 
  -4   6   2    0.89    0.05 
  -4  -6   2    0.91    0.09 
   4  -6  -2    0.74    0.08 
  -4   6   1    7.10    0.21 
  -4   6   1    7.18    0.15 
   4   6  -1    7.06    0.20 
   4   6  -1    6.52    0.20 
  -4   6   1    6.80    0.20 
  -4  -6   1    6.85    0.20 
   4  -6  -1    6.87    0.20 
   4  -6  -1    6.70    0.19 
  -4   6   0    0.47    0.07 
   4   6   0    0.70    0.08 
  -4   6   0    0.73    0.05 
   4   6   0    0.50    0.07 
  -4  -6   0    0.59    0.07 
   4  -6   0    0.50    0.07 
   4  -6   0    0.57    0.07 
  -4   6  -1    5.38    0.18 
   4   6   1    5.85    0.13 
   4   6   1    5.39    0.18 
  -4   6  -1    5.52    0.13 
   4   6   1    5.52    0.18 
   4  -6   1    5.38    0.17 
  -4  -6  -1    5.57    0.17 
   4  -6   1    5.68    0.18 
  -4   6  -2   14.21    0.28 
   4   6   2   14.46    0.34 
  -4   6  -2   13.92    0.34 
   4   6   2   15.25    0.29 
   4  -6   2   14.17    0.33 
  -4  -6  -2   14.34    0.34 
   4  -6   2   14.57    0.32 
  -4  -6  -2   14.55    0.31 
   4   6   3    1.13    0.10 
  -4   6  -3    1.07    0.10 
   4   6   3    1.26    0.08 
  -4   6  -3    1.08    0.08 
   4  -6   3    0.97    0.10 
   4  -6   3    1.24    0.09 
  -4  -6  -3    1.15    0.09 
  -4  -6  -3    1.09    0.11 
   4   6   4    1.11    0.10 
  -4   6  -4    1.34    0.09 
  -4   6  -4    1.22    0.11 
   4   6   4    1.26    0.09 
  -4  -6  -4    1.14    0.08 
   4  -6   4    1.24    0.10 
   4  -6   4    1.22    0.10 
  -4  -6  -4    1.08    0.12 
   4   6   5    1.51    0.12 
   4   6   5    1.56    0.10 
  -4   6  -5    1.56    0.12 
  -4   6  -5    1.56    0.11 
   4  -6   5    1.53    0.12 
   4  -6   5    1.39    0.11 
  -4  -6  -5    1.58    0.10 
  -4  -6  -5    1.70    0.13 
  -4   6  -6    0.03    0.06 
  -4   6  -6   -0.06    0.06 
   4   6   6    0.05    0.06 
   4   6   6    0.02    0.05 
  -4  -6  -6    0.06    0.07 
   4  -6   6   -0.02    0.05 
   4  -6   6    0.01    0.06 
  -4   6  -7    1.09    0.11 
  -4   6  -7    1.09    0.12 
   4   6   7    1.06    0.11 
   4   6   7    1.00    0.11 
   4  -6   7    0.96    0.11 
  -4  -6  -7    1.04    0.11 
   4  -6   7    1.15    0.11 
   4   6   8    2.09    0.14 
   4   6   8    2.13    0.15 
  -4   6  -8    2.19    0.15 
   4  -6   8    2.21    0.14 
  -4  -6  -8    2.08    0.15 
   4  -6   8    2.27    0.14 
   4   6   9    0.27    0.08 
  -4   6  -9    0.20    0.08 
   4   6   9    0.18    0.08 
   4  -6   9    0.30    0.07 
  -4  -6  -9    0.26    0.08 
   4   6  10    1.02    0.12 
  -4   6 -10    1.23    0.14 
   4   6  10    1.10    0.14 
  -4  -6 -10    1.01    0.12 
   4  -6  10    1.31    0.14 
   4   6  11    0.17    0.09 
  -4   6 -11    0.13    0.08 
   4   6  11    0.12    0.09 
  -4  -6 -11    0.28    0.10 
   4  -6  11    0.19    0.08 
  -4  -6 -11    0.13    0.09 
   4   6  12    0.36    0.10 
  -4  -6 -12    0.36    0.11 
   4  -6  12    0.17    0.08 
   4   6  13    0.21    0.10 
  -4  -6 -13    0.19    0.11 
   4  -6  13    0.16    0.09 
   4   6  14    0.55    0.13 
   4  -6  14    0.69    0.13 
  -4   7  15   -0.10    0.09 
   4   7 -15   -0.22    0.12 
   4  -7 -15    0.26    0.12 
  -4   7  14    1.28    0.16 
   4   7 -14    1.02    0.17 
   4  -7 -14    1.03    0.15 
   4   7 -13    0.45    0.14 
  -4   7  13    0.35    0.11 
  -4  -7  13    0.35    0.10 
   4  -7 -13    0.71    0.13 
  -4   7  12    0.04    0.08 
   4   7 -12    0.14    0.11 
   4  -7 -12    0.03    0.08 
  -4  -7  12   -0.03    0.07 
   4   7 -11    1.02    0.15 
  -4   7  11    1.19    0.14 
   4  -7 -11    0.81    0.12 
  -4  -7  11    1.01    0.12 
   4   7 -10    1.55    0.17 
  -4   7  10    1.80    0.13 
  -4   7  10    2.09    0.16 
  -4  -7  10    1.94    0.15 
   4  -7 -10    1.92    0.16 
  -4   7   9    0.12    0.07 
  -4   7   9    0.17    0.06 
   4   7  -9    0.08    0.09 
   4  -7  -9    0.15    0.07 
  -4  -7   9    0.10    0.07 
   4   7  -8    3.56    0.21 
  -4   7   8    3.32    0.17 
   4   7  -8    3.42    0.15 
  -4   7   8    3.60    0.17 
  -4   7   8    3.31    0.15 
  -4  -7   8    3.47    0.18 
   4  -7  -8    3.29    0.17 
   4   7  -7    5.78    0.20 
  -4   7   7    6.16    0.21 
   4   7  -7    6.05    0.24 
  -4   7   7    6.06    0.22 
  -4   7   7    6.25    0.21 
   4  -7  -7    6.13    0.21 
  -4  -7   7    6.19    0.22 
   4   7  -6   25.87    0.56 
  -4   7   6   25.94    0.54 
  -4   7   6   26.35    0.52 
   4   7  -6   25.80    0.53 
  -4   7   6   25.70    0.53 
  -4  -7   6   25.90    0.55 
   4  -7  -6   25.56    0.55 
  -4   7   5   45.63    0.85 
   4   7  -5   45.79    0.85 
  -4   7   5   46.12    0.82 
  -4   7   5   45.89    0.85 
   4   7  -5   45.00    0.87 
  -4  -7   5   45.08    0.85 
   4  -7  -5   45.61    0.86 
  -4   7   4    0.05    0.05 
  -4   7   4    0.07    0.05 
  -4   7   4    0.02    0.04 
   4   7  -4    0.05    0.05 
   4   7  -4    0.02    0.06 
  -4  -7   4    0.02    0.06 
   4  -7  -4    0.02    0.06 
  -4   7   3    0.17    0.06 
   4   7  -3    0.20    0.06 
  -4   7   3    0.23    0.06 
   4   7  -3    0.22    0.06 
  -4   7   3    0.16    0.04 
   4  -7  -3    0.23    0.06 
  -4  -7   3    0.18    0.06 
   4   7  -2    0.26    0.06 
  -4   7   2    0.26    0.06 
   4   7  -2    0.22    0.06 
  -4   7   2    0.29    0.04 
   4  -7  -2    0.16    0.06 
   4  -7  -2    0.26    0.06 
  -4  -7   2    0.17    0.06 
   4   7  -1    6.75    0.21 
  -4   7   1    6.89    0.22 
  -4   7   1    6.90    0.16 
   4   7  -1    6.86    0.21 
   4  -7  -1    7.00    0.22 
  -4  -7   1    7.09    0.21 
   4  -7  -1    6.56    0.20 
  -4   7   0    0.36    0.07 
   4   7   0    0.50    0.07 
   4   7   0    0.34    0.07 
  -4  -7   0    0.36    0.06 
   4  -7   0    0.27    0.06 
   4  -7   0    0.39    0.07 
  -4   7  -1    9.77    0.28 
   4   7   1   10.05    0.27 
   4   7   1    9.94    0.28 
   4  -7   1   10.39    0.28 
   4  -7   1    9.90    0.25 
  -4  -7  -1   10.09    0.26 
   4   7   2    0.54    0.08 
   4   7   2    0.70    0.08 
  -4   7  -2    0.47    0.08 
   4  -7   2    0.63    0.07 
  -4  -7  -2    0.54    0.07 
   4  -7   2    0.61    0.08 
  -4   7  -3    0.45    0.08 
   4   7   3    0.47    0.07 
   4  -7   3    0.61    0.07 
  -4  -7  -3    0.55    0.07 
   4  -7   3    0.61    0.09 
  -4  -7  -3    0.58    0.09 
  -4   7  -4    3.45    0.17 
   4   7   4    3.39    0.16 
  -4  -7  -4    3.40    0.17 
  -4  -7  -4    3.28    0.14 
   4  -7   4    3.69    0.15 
   4  -7   4    3.60    0.17 
  -4   7  -5    1.83    0.14 
   4   7   5    1.69    0.13 
   4  -7   5    1.62    0.13 
   4  -7   5    1.78    0.12 
  -4  -7  -5    1.72    0.14 
   4   7   6    1.85    0.14 
  -4   7  -6    1.93    0.14 
   4   7   6    1.63    0.12 
   4  -7   6    1.78    0.13 
  -4  -7  -6    1.53    0.14 
   4  -7   6    1.70    0.13 
  -4   7  -7    7.47    0.26 
   4   7   7    7.05    0.26 
   4   7   7    7.66    0.24 
  -4  -7  -7    7.65    0.27 
   4  -7   7    7.55    0.25 
   4  -7   7    6.65    0.24 
   4   7   8    2.94    0.18 
  -4   7  -8    3.03    0.18 
   4   7   8    3.04    0.16 
   4  -7   8    3.01    0.16 
  -4  -7  -8    3.04    0.18 
   4  -7   8    3.04    0.17 
   4   7   9    0.10    0.07 
   4   7   9    0.12    0.08 
  -4   7  -9    0.17    0.08 
   4  -7   9    0.07    0.06 
  -4  -7  -9   -0.01    0.07 
   4   7  10    6.55    0.28 
   4   7  10    7.02    0.27 
  -4   7 -10    6.56    0.26 
   4  -7  10    6.81    0.27 
  -4  -7 -10    6.80    0.27 
   4   7  11    4.22    0.24 
   4   7  11    4.36    0.23 
  -4  -7 -11    4.08    0.23 
   4  -7  11    3.58    0.21 
   4   7  12    0.16    0.09 
  -4  -7 -12    0.16    0.10 
   4  -7  12   -0.03    0.07 
   4   7  13    0.16    0.10 
  -4  -7 -13    0.05    0.11 
   4  -7  13    0.28    0.10 
   4   8 -14    2.21    0.23 
  -4   8  14    1.70    0.20 
  -4  -8  14    1.34    0.16 
   4  -8 -14    1.47    0.18 
  -4   8  13    0.35    0.11 
   4   8 -13    0.47    0.14 
   4  -8 -13    0.58    0.13 
  -4  -8  13    0.34    0.10 
  -4   8  12    0.18    0.09 
   4   8 -12    0.20    0.12 
  -4  -8  12    0.30    0.09 
   4  -8 -12    0.13    0.09 
  -4   8  11    0.05    0.08 
   4   8 -11    0.10    0.11 
  -4  -8  11    0.04    0.08 
   4  -8 -11    0.16    0.09 
   4   8 -10    0.11    0.11 
  -4   8  10    0.16    0.08 
   4  -8 -10    0.27    0.09 
  -4  -8  10    0.29    0.09 
  -4   8   9    4.71    0.20 
  -4   8   9    4.82    0.22 
   4   8  -9    4.85    0.25 
  -4  -8   9    4.61    0.22 
   4  -8  -9    4.96    0.21 
  -4   8   8    9.99    0.29 
   4   8  -8    9.34    0.32 
  -4   8   8    9.26    0.28 
   4   8  -8    9.24    0.28 
  -4  -8   8    9.15    0.30 
   4  -8  -8    9.87    0.29 
   4  -8  -8    9.26    0.30 
   4   8  -7    3.64    0.17 
  -4   8   7    3.79    0.17 
  -4   8   7    3.69    0.17 
   4   8  -7    3.58    0.20 
  -4   8   7    3.81    0.17 
  -4  -8   7    3.79    0.19 
   4  -8  -7    3.96    0.19 
  -4   8   6    0.04    0.05 
  -4   8   6   -0.02    0.05 
  -4   8   6    0.06    0.06 
   4   8  -6    0.03    0.07 
   4   8  -6    0.06    0.05 
  -4  -8   6    0.05    0.07 
   4  -8  -6    0.10    0.07 
   4   8  -5    1.06    0.12 
   4   8  -5    1.03    0.11 
  -4   8   5    0.73    0.09 
  -4   8   5    0.73    0.09 
  -4  -8   5    0.80    0.10 
   4  -8  -5    0.78    0.10 
  -4   8   4   16.56    0.39 
  -4   8   4   15.94    0.39 
   4   8  -4   16.65    0.40 
   4   8  -4   16.03    0.39 
   4  -8  -4   16.05    0.38 
  -4  -8   4   15.84    0.39 
   4   8  -3    0.57    0.08 
  -4   8   3    0.71    0.09 
   4   8  -3    0.42    0.08 
   4  -8  -3    0.61    0.08 
   4  -8  -3    0.82    0.10 
  -4  -8   3    0.34    0.08 
   4   8  -2    0.05    0.06 
  -4   8   2    0.08    0.06 
   4   8  -2    0.09    0.06 
   4  -8  -2   -0.02    0.05 
  -4  -8   2    0.10    0.06 
   4  -8  -2   -0.03    0.06 
   4   8  -1    2.21    0.13 
   4   8  -1    2.50    0.14 
  -4   8   1    2.52    0.15 
   4  -8  -1    2.38    0.15 
  -4  -8   1    2.56    0.14 
   4  -8  -1    2.86    0.14 
   4   8   0    1.99    0.12 
   4   8   0    1.81    0.13 
  -4   8   0    1.85    0.13 
  -4  -8   0    1.89    0.13 
   4  -8   0    1.87    0.13 
   4  -8   0    1.86    0.12 
  -4   8  -1    0.24    0.07 
   4   8   1    0.23    0.07 
   4   8   1    0.23    0.06 
   4  -8   1    0.40    0.07 
  -4  -8  -1    0.29    0.07 
   4  -8   1    0.25    0.07 
  -4   8  -2    0.83    0.10 
   4   8   2    0.90    0.10 
   4   8   2    0.64    0.09 
   4  -8   2    0.73    0.10 
  -4  -8  -2    0.78    0.09 
   4  -8   2    0.86    0.09 
   4   8   3    0.11    0.06 
  -4   8  -3    0.16    0.07 
  -4  -8  -3    0.08    0.07 
   4  -8   3    0.18    0.06 
   4  -8   3    0.13    0.07 
  -4  -8  -3    0.13    0.06 
   4   8   4    1.34    0.12 
  -4   8  -4    1.28    0.13 
   4  -8   4    1.25    0.11 
  -4  -8  -4    1.35    0.11 
   4  -8   4    1.44    0.13 
  -4  -8  -4    1.29    0.14 
   4   8   5    0.07    0.06 
  -4   8  -5    0.13    0.07 
  -4  -8  -5    0.03    0.07 
   4  -8   5    0.10    0.06 
   4  -8   5    0.11    0.07 
  -4   8  -6    1.95    0.15 
   4   8   6    1.89    0.15 
  -4  -8  -6    2.20    0.16 
   4  -8   6    1.85    0.13 
   4  -8   6    2.10    0.15 
   4   8   7    0.13    0.07 
  -4   8  -7    0.22    0.08 
   4  -8   7    0.14    0.07 
  -4  -8  -7    0.16    0.08 
   4  -8   7    0.22    0.08 
  -4   8  -8    1.86    0.16 
   4   8   8    1.97    0.17 
  -4  -8  -8    1.89    0.16 
   4  -8   8    1.73    0.15 
   4  -8   8    1.70    0.15 
  -4   8  -9    3.74    0.21 
   4   8   9    3.51    0.21 
  -4  -8  -9    3.09    0.20 
   4  -8   9    3.83    0.20 
  -4   8 -10    0.14    0.09 
   4   8  10    0.13    0.09 
  -4  -8 -10    0.16    0.09 
   4   8  11    0.34    0.11 
  -4  -8 -11    0.25    0.10 
  -4  -8 -12    0.12    0.10 
  -4   9  14    0.03    0.10 
  -4  -9  14    0.05    0.09 
   4   9 -13    0.81    0.17 
  -4   9  13    0.87    0.14 
  -4  -9  13    0.46    0.12 
  -4   9  12   -0.01    0.09 
   4   9 -12    0.06    0.12 
  -4  -9  12    0.00    0.08 
   4   9 -11    0.60    0.14 
  -4   9  11    0.50    0.11 
  -4  -9  11    0.65    0.12 
  -4   9  10    0.00    0.08 
   4   9 -10   -0.04    0.10 
  -4  -9  10   -0.02    0.08 
   4   9  -9   -0.02    0.09 
  -4   9   9    0.18    0.07 
  -4  -9   9    0.08    0.08 
   4  -9  -9    0.12    0.08 
  -4   9   8    2.85    0.16 
  -4   9   8    2.92    0.17 
   4   9  -8    2.75    0.16 
   4   9  -8    2.81    0.19 
   4  -9  -8    3.07    0.18 
  -4  -9   8    2.60    0.18 
  -4   9   7    0.19    0.07 
   4   9  -7    0.12    0.07 
   4   9  -7   -0.02    0.08 
  -4   9   7    0.10    0.07 
   4  -9  -7    0.06    0.07 
  -4  -9   7    0.09    0.08 
   4   9  -6   -0.08    0.05 
  -4   9   6    0.01    0.06 
   4   9  -6    0.11    0.08 
   4  -9  -6    0.06    0.07 
  -4  -9   6    0.10    0.07 
   4  -9  -6    0.09    0.07 
   4   9  -5    5.79    0.22 
   4   9  -5    5.74    0.23 
  -4   9   5    5.77    0.22 
   4  -9  -5    6.19    0.22 
   4  -9  -5    5.87    0.23 
  -4  -9   5    5.72    0.23 
  -4   9   4    0.25    0.07 
   4   9  -4    0.26    0.08 
   4   9  -4    0.18    0.07 
   4  -9  -4    0.17    0.08 
   4  -9  -4    0.17    0.07 
  -4  -9   4    0.28    0.08 
   4   9  -3   29.29    0.62 
  -4   9   3   29.48    0.63 
   4   9  -3   29.35    0.62 
   4  -9  -3   29.57    0.62 
   4  -9  -3   29.02    0.60 
  -4  -9   3   29.98    0.62 
   4   9  -2    8.31    0.27 
   4   9  -2    8.02    0.26 
  -4   9   2    7.85    0.26 
   4  -9  -2    8.00    0.24 
   4  -9  -2    7.59    0.26 
  -4  -9   2    8.03    0.26 
   4   9  -1    2.33    0.14 
   4   9  -1    2.04    0.14 
  -4   9   1    2.21    0.15 
   4  -9  -1    2.09    0.15 
  -4  -9   1    2.36    0.15 
  -4   9   0    1.65    0.14 
   4   9   0    1.60    0.12 
   4   9   0    1.67    0.14 
   4  -9   0    1.59    0.14 
  -4  -9   0    1.65    0.13 
   4   9   1    0.02    0.06 
   4   9   1    0.11    0.07 
  -4   9  -1    0.02    0.06 
   4  -9   1    0.03    0.07 
  -4  -9  -1   -0.05    0.06 
   4   9   2    0.13    0.06 
   4   9   2    0.14    0.07 
  -4   9  -2    0.15    0.07 
   4  -9   2    0.02    0.07 
  -4  -9  -2    0.00    0.06 
  -4   9  -3    0.88    0.11 
   4   9   3    1.05    0.12 
  -4  -9  -3    0.92    0.11 
   4  -9   3    1.00    0.12 
  -4  -9  -3    1.13    0.11 
   4   9   4    0.48    0.09 
  -4   9  -4    0.50    0.10 
  -4  -9  -4    0.56    0.08 
  -4  -9  -4    0.53    0.10 
   4  -9   4    0.61    0.10 
   4   9   5    0.01    0.06 
  -4   9  -5    0.19    0.08 
  -4  -9  -5    0.10    0.08 
   4  -9   5   -0.05    0.07 
   4   9   6    0.11    0.07 
  -4   9  -6    0.13    0.08 
   4  -9   6    0.41    0.09 
  -4  -9  -6    0.17    0.09 
  -4   9  -7    0.88    0.12 
   4   9   7    0.70    0.11 
  -4  -9  -7    0.94    0.13 
   4  -9   7    1.00    0.13 
   4   9   8    7.58    0.30 
  -4   9  -8    7.23    0.29 
   4  -9   8    7.41    0.28 
  -4  -9  -8    7.24    0.29 
  -4   9  -9    0.16    0.09 
   4   9   9    0.06    0.08 
  -4  -9  -9    0.04    0.08 
   4  -9   9    0.11    0.09 
   4   9  10    1.08    0.15 
  -4   9 -10    1.20    0.15 
  -4  -9 -10    1.14    0.15 
   4   9  11    0.75    0.14 
  -4  -9 -11    0.71    0.14 
   4  10 -13    0.19    0.14 
   4  10 -12    0.09    0.13 
  -4 -10  12    0.16    0.10 
   4  10 -11    1.05    0.17 
  -4 -10  11    1.36    0.16 
   4  10 -10   -0.06    0.10 
  -4 -10  10    0.01    0.08 
   4  10  -9    0.09    0.10 
   4 -10  -9    0.04    0.08 
  -4 -10   9   -0.03    0.08 
   4  10  -8    0.78    0.13 
  -4  10   8    0.90    0.11 
   4  10  -8    0.87    0.11 
   4 -10  -8    1.00    0.12 
  -4 -10   8    0.62    0.12 
   4  10  -7    0.03    0.08 
   4  10  -7    0.01    0.06 
  -4  10   7    0.01    0.07 
  -4 -10   7    0.07    0.08 
   4 -10  -7    0.04    0.08 
   4  10  -6    0.01    0.07 
  -4  10   6   -0.04    0.06 
   4  10  -6    0.07    0.07 
   4 -10  -6    0.07    0.08 
  -4 -10   6    0.04    0.07 
   4  10  -5    0.23    0.08 
  -4  10   5    0.23    0.09 
   4  10  -5    0.21    0.09 
   4 -10  -5    0.35    0.09 
  -4 -10   5    0.25    0.09 
  -4  10   4    1.74    0.15 
   4  10  -4    1.56    0.14 
   4  10  -4    1.56    0.14 
   4 -10  -4    1.73    0.16 
  -4 -10   4    1.61    0.15 
  -4  10   3    0.19    0.08 
   4  10  -3    0.06    0.07 
   4  10  -3    0.27    0.08 
   4 -10  -3    0.14    0.08 
  -4 -10   3    0.10    0.08 
   4  10  -2    0.35    0.08 
   4  10  -2    0.24    0.08 
  -4  10   2    0.22    0.08 
  -4 -10   2    0.18    0.08 
   4 -10  -2    0.14    0.08 
  -4  10   1    1.55    0.15 
   4  10  -1    1.38    0.13 
   4  10  -1    1.69    0.14 
  -4 -10   1    1.59    0.14 
   4 -10  -1    1.70    0.14 
   4  10   0    0.40    0.08 
   4  10   0    0.35    0.09 
  -4  10   0    0.37    0.09 
   4 -10   0    0.43    0.09 
  -4 -10   0    0.28    0.09 
   4  10   1    0.17    0.07 
  -4  10  -1    0.27    0.08 
   4  10   1    0.22    0.07 
  -4 -10  -1    0.21    0.08 
   4 -10   1    0.23    0.08 
   4  10   2    1.75    0.14 
  -4  10  -2    1.62    0.15 
   4  10   2    1.74    0.15 
  -4 -10  -2    1.91    0.14 
   4 -10   2    2.03    0.16 
  -4  10  -3    0.19    0.08 
   4  10   3    0.32    0.08 
   4  10   3    0.35    0.08 
  -4 -10  -3    0.36    0.09 
  -4 -10  -3    0.28    0.08 
   4 -10   3    0.37    0.09 
  -4  10  -4    0.46    0.10 
   4  10   4    0.43    0.09 
  -4 -10  -4    0.32    0.10 
   4 -10   4    0.21    0.09 
  -4  10  -5    1.38    0.15 
   4  10   5    1.57    0.15 
   4 -10   5    1.52    0.16 
  -4 -10  -5    1.51    0.16 
   4  10   6    4.81    0.23 
  -4  10  -6    5.23    0.25 
   4 -10   6    4.79    0.24 
  -4 -10  -6    4.75    0.24 
   4  10   7    0.30    0.10 
  -4  10  -7    0.39    0.10 
  -4 -10  -7    0.32    0.10 
   4 -10   7    0.35    0.10 
  -4  10  -8    0.32    0.10 
   4  10   8    0.73    0.12 
  -4 -10  -8    0.46    0.12 
   4 -10   8    0.41    0.11 
   4  10   9    0.04    0.08 
  -4  10  -9    0.24    0.10 
  -4 -10  -9    0.02    0.09 
   4 -10   9    0.02    0.09 
   4  10  10    0.11    0.10 
  -4  10 -10    0.07    0.10 
  -4 -10 -10    0.10    0.10 
  -4 -11  11    0.25    0.11 
   4  11 -10    0.34    0.12 
  -4 -11  10    0.14    0.11 
   4  11  -9    0.05    0.10 
  -4 -11   9    0.18    0.10 
   4  11  -8    0.29    0.09 
   4  11  -8    0.28    0.11 
  -4  11   8    0.30    0.10 
   4 -11  -8    0.29    0.10 
  -4 -11   8    0.12    0.10 
   4  11  -7    0.76    0.12 
   4  11  -7    0.78    0.13 
  -4  11   7    0.72    0.11 
  -4 -11   7    0.55    0.12 
   4 -11  -7    0.66    0.12 
   4  11  -6    0.30    0.09 
  -4  11   6    0.16    0.08 
   4  11  -6    0.18    0.09 
   4 -11  -6    0.06    0.08 
  -4 -11   6    0.06    0.08 
   4  11  -5    0.08    0.08 
   4  11  -5    0.04    0.07 
  -4  11   5   -0.02    0.07 
   4 -11  -5    0.17    0.09 
  -4 -11   5    0.11    0.08 
  -4  11   4    4.12    0.22 
   4  11  -4    4.07    0.21 
   4  11  -4    3.80    0.20 
   4 -11  -4    4.18    0.22 
  -4 -11   4    3.81    0.22 
   4  11  -3    2.09    0.16 
  -4  11   3    2.29    0.18 
   4  11  -3    1.82    0.15 
  -4 -11   3    2.04    0.16 
   4 -11  -3    1.94    0.17 
   4  11  -2    0.64    0.11 
   4  11  -2    0.75    0.11 
  -4  11   2    0.56    0.11 
   4 -11  -2    0.66    0.12 
  -4 -11   2    0.71    0.11 
   4  11  -1    0.20    0.08 
  -4  11   1    0.17    0.09 
   4  11  -1    0.19    0.08 
   4 -11  -1    0.12    0.09 
  -4 -11   1    0.29    0.09 
   4  11   0    2.35    0.16 
   4  11   0    2.14    0.17 
  -4  11   0    2.20    0.17 
   4 -11   0    2.28    0.18 
  -4 -11   0    2.70    0.18 
   4  11   1    0.06    0.07 
  -4  11  -1   -0.01    0.07 
   4  11   1    0.00    0.07 
   4 -11   1    0.03    0.08 
  -4 -11  -1   -0.04    0.07 
   4  11   2    1.33    0.14 
  -4  11  -2    1.38    0.15 
   4  11   2    1.17    0.14 
  -4 -11  -2    1.28    0.13 
   4 -11   2    1.22    0.14 
   4  11   3    0.41    0.10 
  -4  11  -3    0.32    0.10 
   4  11   3    0.36    0.09 
  -4 -11  -3    0.39    0.10 
   4 -11   3    0.46    0.11 
  -4 -11  -3    0.41    0.09 
   4  11   4    1.76    0.16 
  -4  11  -4    1.70    0.16 
  -4 -11  -4    1.78    0.18 
   4 -11   4    1.81    0.17 
   4  11   5    0.82    0.12 
  -4  11  -5    0.96    0.14 
  -4 -11  -5    0.90    0.13 
   4 -11   5    1.07    0.14 
  -4  11  -6    0.08    0.09 
   4  11   6    0.07    0.08 
   4 -11   6    0.07    0.09 
  -4 -11  -6    0.12    0.09 
  -4  11  -7   -0.14    0.08 
   4  11   7   -0.03    0.07 
   4 -11   7   -0.02    0.08 
  -4 -11  -7    0.06    0.09 
   4  11   8    0.28    0.10 
  -4  11  -8    0.33    0.11 
   4 -11   8    0.28    0.11 
  -4 -11  -8    0.49    0.12 
   4  11   9    2.09    0.20 
  -4  11  -9    2.20    0.20 
   4 -11   9    2.04    0.20 
  -4 -11  -9    1.90    0.21 
  -4  11 -10    0.39    0.12 
  -4 -11 -10    0.24    0.12 
  -4 -12   9    0.13    0.10 
   4 -12  -8   -0.11    0.09 
  -4 -12   8    0.02    0.10 
  -4  12   7    0.83    0.13 
   4  12  -7    0.44    0.11 
  -4 -12   7    0.70    0.13 
   4 -12  -7    0.54    0.12 
  -4  12   6    0.05    0.09 
   4  12  -6    0.15    0.09 
  -4 -12   6    0.06    0.09 
   4 -12  -6    0.17    0.10 
   4  12  -5    0.32    0.10 
  -4  12   5    0.16    0.09 
   4  12  -5    0.22    0.09 
  -4 -12   5    0.28    0.10 
   4 -12  -5    0.20    0.09 
   4  12  -4   -0.06    0.07 
  -4  12   4   -0.06    0.08 
   4  12  -4    0.14    0.08 
  -4 -12   4   -0.06    0.08 
   4 -12  -4    0.05    0.08 
  -4  12   3    0.17    0.09 
   4  12  -3    0.11    0.08 
   4  12  -3    0.08    0.08 
   4 -12  -3    0.03    0.09 
  -4 -12   3    0.06    0.09 
   4  12  -2    1.68    0.16 
   4  12  -2    1.77    0.17 
  -4  12   2    1.69    0.16 
   4 -12  -2    1.97    0.17 
  -4 -12   2    2.05    0.17 
   4  12  -1    0.09    0.08 
  -4  12   1   -0.06    0.08 
   4  12  -1    0.14    0.09 
   4 -12  -1    0.05    0.09 
  -4 -12   1   -0.01    0.08 
   4  12   0    2.20    0.17 
  -4  12   0    2.46    0.19 
   4  12   0    2.36    0.18 
  -4 -12   0    2.48    0.18 
   4 -12   0    2.35    0.19 
   4  12   1    0.21    0.09 
  -4  12  -1    0.26    0.10 
   4  12   1    0.13    0.08 
   4 -12   1    0.35    0.10 
  -4 -12  -1    0.29    0.09 
   4  12   2    1.17    0.15 
  -4  12  -2    1.42    0.16 
   4  12   2    1.82    0.16 
   4 -12   2    1.24    0.15 
  -4 -12  -2    1.60    0.16 
  -4  12  -3    0.12    0.09 
   4  12   3    0.07    0.08 
  -4 -12  -3   -0.03    0.08 
  -4 -12  -3    0.01    0.08 
   4 -12   3    0.13    0.10 
  -4  12  -4   -0.09    0.08 
   4  12   4   -0.10    0.07 
   4 -12   4   -0.03    0.09 
  -4 -12  -4    0.10    0.10 
   4  12   5    0.40    0.10 
  -4  12  -5    0.47    0.12 
   4 -12   5    0.17    0.10 
  -4 -12  -5    0.50    0.12 
   4  12   6    0.11    0.09 
  -4  12  -6    0.21    0.11 
   4 -12   6    0.08    0.10 
  -4 -12  -6    0.32    0.11 
   4  12   7    1.11    0.15 
  -4  12  -7    1.12    0.15 
   4 -12   7    1.21    0.16 
  -4 -12  -7    1.10    0.15 
  -4  12  -8    0.30    0.12 
   4  12   8    0.69    0.13 
  -4 -12  -8    0.40    0.13 
   4 -12   8    0.45    0.13 
   4  13  -7    0.27    0.10 
  -4  13   7   -0.03    0.09 
   4 -13  -7   -0.06    0.09 
   4  13  -6    0.03    0.08 
  -4  13   6    0.11    0.09 
   4 -13  -6   -0.07    0.09 
  -4 -13   6   -0.09    0.09 
  -4  13   5    1.25    0.16 
   4  13  -5    1.24    0.15 
   4 -13  -5    1.37    0.17 
  -4 -13   5    0.96    0.15 
  -4  13   4    0.11    0.09 
   4  13  -4   -0.07    0.08 
   4 -13  -4   -0.06    0.09 
  -4 -13   4   -0.05    0.09 
  -4  13   3   -0.03    0.09 
   4  13  -3   -0.02    0.08 
   4 -13  -3   -0.07    0.09 
  -4 -13   3    0.05    0.09 
  -4  13   2   -0.01    0.09 
   4  13  -2    0.09    0.09 
   4 -13  -2    0.11    0.09 
  -4 -13   2   -0.05    0.09 
  -4  13   1    0.62    0.13 
   4  13  -1    0.36    0.11 
   4 -13  -1    0.43    0.12 
  -4 -13   1    0.19    0.10 
   4  13   0    0.53    0.12 
  -4  13   0    0.58    0.12 
   4 -13   0    0.57    0.13 
  -4 -13   0    0.45    0.11 
   4  13   1    0.02    0.08 
  -4  13  -1    0.20    0.10 
   4 -13   1   -0.05    0.09 
  -4 -13  -1    0.03    0.09 
  -4  13  -2    0.06    0.09 
   4  13   2   -0.10    0.08 
   4  13   2   -0.02    0.08 
   4 -13   2   -0.08    0.09 
  -4 -13  -2   -0.05    0.09 
   4  13   3   -0.02    0.08 
  -4  13  -3   -0.02    0.09 
  -4 -13  -3   -0.04    0.09 
   4 -13   3    0.01    0.10 
  -4  13  -4    0.17    0.11 
   4  13   4    0.03    0.09 
   4 -13   4    0.05    0.10 
  -4 -13  -4    0.12    0.10 
   4  13   5    1.47    0.17 
  -4  13  -5    1.29    0.17 
  -4 -13  -5    1.14    0.17 
   4 -13   5    1.25    0.17 
   4  13   6    0.81    0.13 
   4 -13   6    0.46    0.14 
   4  13   7    1.61    0.18 
   4  14  -5    0.22    0.12 
  -4  14   5    0.18    0.12 
   4 -14  -5   -0.03    0.11 
   4  14  -4    0.08    0.11 
  -4  14   4    0.11    0.11 
   4 -14  -4   -0.04    0.10 
   4  14  -3    0.15    0.11 
  -4  14   3    0.50    0.12 
  -4 -14   3    0.23    0.12 
   4 -14  -3    0.37    0.13 
   4  14  -2    3.40    0.24 
  -4  14   2    2.70    0.23 
  -4 -14   2    2.85    0.23 
   4 -14  -2    3.04    0.24 
   4  14  -1    0.01    0.09 
  -4  14   1    0.04    0.11 
   4 -14  -1    0.31    0.12 
  -4 -14   1    0.17    0.11 
   4  14   0    0.03    0.10 
  -4  14   0    0.01    0.10 
   4 -14   0    0.09    0.11 
  -4 -14   0    0.16    0.11 
   4  14   1   -0.03    0.10 
  -4 -14  -1    0.14    0.11 
   4 -14   1   -0.02    0.10 
  -4 -14  -2    0.06    0.12 
  -5   0  16    1.22    0.16 
   5   0 -16    1.61    0.19 
  -5   0  15    0.03    0.07 
   5   0 -15    0.02    0.10 
  -5   0  14    0.15    0.08 
   5   0 -14    0.19    0.11 
  -5   0  13    0.03    0.06 
   5   0 -13   -0.04    0.08 
   5   0 -12    1.62    0.17 
  -5   0  12    1.87    0.12 
  -5   0  12    1.62    0.14 
  -5   0  11    0.05    0.05 
   5   0 -11    0.14    0.08 
  -5   0  11   -0.01    0.05 
  -5   0  10   13.78    0.36 
   5   0 -10   14.48    0.37 
  -5   0  10   14.35    0.33 
  -5   0   9    0.02    0.04 
  -5   0   9   -0.03    0.04 
   5   0  -9    0.02    0.07 
  -5   0   8    3.10    0.14 
   5   0  -8    3.24    0.16 
  -5   0   8    3.18    0.13 
  -5   0   7    0.02    0.04 
   5   0  -7    0.04    0.05 
  -5   0   7    0.04    0.03 
   5   0  -6   10.82    0.26 
  -5   0   6   10.79    0.25 
  -5   0   6   10.70    0.26 
  -5   0   5   -0.03    0.03 
   5   0  -5    0.01    0.04 
  -5   0   5   -0.02    0.03 
   5   0  -4    4.79    0.14 
  -5   0   4    4.67    0.13 
  -5   0   4    4.81    0.09 
  -5   0   4    4.69    0.14 
  -5   0   3   -0.01    0.02 
  -5   0   3   -0.03    0.02 
   5   0  -3    0.01    0.04 
   5   0  -3    0.04    0.03 
   5   0  -2    1.69    0.09 
  -5   0   2    1.83    0.07 
   5   0  -2    1.86    0.08 
  -5   0   2    1.84    0.07 
   5   0  -1    0.04    0.03 
  -5   0   1   -0.04    0.03 
   5   0  -1    0.10    0.04 
  -5   0   1    0.06    0.03 
  -5   0   0    0.31    0.03 
  -5   0   0    0.36    0.05 
   5   0   0    0.36    0.04 
   5   0   0    0.26    0.04 
   5   0   1    0.09    0.03 
  -5   0  -1    0.08    0.04 
  -5   0  -1    0.13    0.02 
   5   0   1    0.12    0.04 
   5   0   2    3.33    0.12 
   5   0   2    3.52    0.11 
  -5   0  -2    3.35    0.12 
  -5   0  -2    3.57    0.08 
   5   0   3    0.02    0.02 
   5   0   3    0.01    0.03 
   5   0   3    0.01    0.03 
  -5   0  -3    0.01    0.04 
  -5   0  -4    3.49    0.13 
   5   0   4    3.52    0.12 
   5   0   5   -0.03    0.04 
   5   0   5    0.08    0.04 
  -5   0  -5    0.07    0.04 
  -5   0  -6    0.52    0.07 
  -5   0  -6    0.41    0.07 
   5   0   6    0.56    0.08 
  -5   0  -7    0.01    0.06 
   5   0   7    0.03    0.05 
  -5   0  -7   -0.02    0.05 
   5   0   8    2.31    0.14 
  -5   0  -8    1.99    0.14 
  -5   0  -8    2.21    0.15 
  -5   0  -9    0.02    0.07 
   5   0   9   -0.03    0.05 
  -5   0  -9   -0.02    0.06 
  -5   0 -10    2.85    0.18 
  -5   0 -10    2.80    0.17 
   5   0  10    2.92    0.17 
  -5   0 -11   -0.03    0.07 
  -5   0 -11    0.21    0.09 
   5   0  11    0.01    0.06 
   5   0  12    0.53    0.11 
  -5   0 -12    0.57    0.12 
  -5   0 -13   -0.08    0.09 
   5   0  13    0.08    0.08 
  -5   0 -14    9.91    0.37 
   5   0  14    8.99    0.36 
  -5   0 -15    0.03    0.11 
  -5  -1  17    1.20    0.16 
   5   1 -16    0.74    0.16 
  -5   1  16    0.93    0.15 
   5  -1 -16    0.95    0.17 
  -5  -1  16    0.78    0.13 
  -5   1  15    0.10    0.07 
   5   1 -15   -0.07    0.10 
  -5  -1  15    0.00    0.07 
   5  -1 -15    0.04    0.10 
   5   1 -14    0.72    0.14 
  -5   1  14    0.56    0.11 
   5  -1 -14    0.51    0.12 
  -5  -1  14    0.42    0.09 
  -5   1  13    0.13    0.08 
   5   1 -13    0.24    0.10 
   5  -1 -13    0.17    0.10 
  -5  -1  13    0.30    0.08 
  -5  -1  13    0.22    0.07 
   5   1 -12    0.47    0.11 
  -5   1  12    0.39    0.07 
  -5   1  12    0.43    0.09 
   5  -1 -12    0.39    0.10 
  -5  -1  12    0.16    0.06 
  -5  -1  12    0.40    0.08 
  -5   1  11    6.68    0.21 
  -5   1  11    6.54    0.24 
   5   1 -11    6.67    0.26 
  -5  -1  11    6.78    0.24 
  -5  -1  11    7.16    0.22 
   5  -1 -11    6.76    0.26 
  -5   1  10    3.79    0.17 
   5   1 -10    3.86    0.19 
  -5   1  10    4.19    0.16 
  -5  -1  10    3.97    0.16 
  -5  -1  10    3.78    0.17 
   5  -1 -10    4.20    0.20 
  -5   1   9    1.82    0.10 
   5   1  -9    1.87    0.15 
   5  -1  -9    2.01    0.14 
  -5  -1   9    1.85    0.12 
  -5  -1   9    1.84    0.11 
   5   1  -8    1.38    0.12 
  -5   1   8    1.44    0.09 
  -5   1   8    1.32    0.10 
  -5  -1   8    1.32    0.09 
  -5  -1   8    1.41    0.09 
   5  -1  -8    1.34    0.12 
   5   1  -7    1.54    0.11 
  -5   1   7    1.39    0.10 
  -5   1   7    1.47    0.09 
  -5  -1   7    1.48    0.09 
  -5  -1   7    1.26    0.08 
   5  -1  -7    1.58    0.10 
   5   1  -6    1.29    0.10 
  -5   1   6    1.16    0.07 
  -5   1   6    1.10    0.09 
  -5  -1   6    1.27    0.08 
  -5  -1   6    1.26    0.08 
   5  -1  -6    1.37    0.09 
  -5   1   5    0.90    0.07 
   5   1  -5    0.92    0.08 
  -5   1   5    0.90    0.07 
   5  -1  -5    1.09    0.08 
  -5  -1   5    0.80    0.07 
  -5  -1   5    0.86    0.07 
  -5   1   4    0.08    0.03 
   5   1  -4    0.09    0.04 
  -5   1   4    0.06    0.04 
  -5   1   4    0.08    0.02 
  -5  -1   4    0.14    0.04 
  -5  -1   4    0.06    0.03 
  -5  -1   4    0.10    0.02 
   5  -1  -4    0.06    0.04 
   5   1  -3   22.82    0.42 
  -5   1   3   22.83    0.40 
   5   1  -3   22.29    0.43 
  -5  -1   3   23.38    0.39 
   5  -1  -3   22.67    0.41 
   5  -1  -3   22.07    0.44 
  -5  -1   3   22.81    0.42 
  -5   1   2    0.19    0.03 
   5   1  -2    0.13    0.04 
   5   1  -2    0.15    0.04 
  -5   1   2    0.20    0.03 
   5  -1  -2    0.19    0.03 
  -5  -1   2    0.16    0.03 
   5  -1  -2    0.15    0.04 
  -5  -1   2    0.13    0.03 
   5   1  -1   21.92    0.40 
  -5   1   1   21.84    0.39 
   5   1  -1   21.64    0.40 
  -5   1   1   22.05    0.40 
  -5  -1   1   22.02    0.39 
  -5  -1   1   21.58    0.40 
   5  -1  -1   21.13    0.42 
   5  -1  -1   22.11    0.37 
   5   1   0    0.37    0.05 
  -5   1   0    0.25    0.04 
  -5   1   0    0.36    0.04 
   5   1   0    0.34    0.04 
  -5  -1   0    0.26    0.04 
  -5  -1   0    0.31    0.03 
   5  -1   0    0.29    0.05 
   5   1   1   33.35    0.59 
  -5   1  -1   32.43    0.59 
  -5   1  -1   32.86    0.55 
   5   1   1   32.98    0.58 
   5  -1   1   32.39    0.60 
   5  -1   1   32.75    0.56 
  -5  -1  -1   32.67    0.59 
  -5  -1  -1   34.49    0.55 
   5   1   2    0.04    0.03 
  -5   1  -2    0.09    0.02 
   5   1   2    0.01    0.03 
  -5   1  -2    0.03    0.04 
   5  -1   2    0.10    0.03 
  -5  -1  -2    0.05    0.04 
  -5  -1  -2    0.05    0.01 
   5  -1   2    0.01    0.03 
  -5   1  -3    0.70    0.08 
   5   1   3    0.63    0.06 
   5   1   3    0.83    0.07 
   5  -1   3    0.72    0.06 
  -5  -1  -3    0.68    0.07 
   5  -1   3    0.81    0.05 
  -5   1  -4    0.80    0.09 
  -5   1  -4    0.94    0.07 
   5   1   4    0.77    0.07 
   5   1   4    0.74    0.07 
   5  -1   4    0.81    0.08 
  -5  -1  -4    0.83    0.09 
   5  -1   4    0.89    0.05 
  -5   1  -5    7.03    0.21 
  -5   1  -5    6.99    0.19 
   5   1   5    7.10    0.20 
   5   1   5    6.67    0.20 
   5  -1   5    6.89    0.14 
  -5  -1  -5    6.86    0.20 
   5  -1   5    6.51    0.20 
  -5   1  -6    0.40    0.07 
  -5   1  -6    0.40    0.07 
   5   1   6    0.46    0.07 
   5   1   6    0.31    0.06 
   5  -1   6    0.48    0.07 
  -5  -1  -6    0.34    0.07 
   5   1   7    0.30    0.06 
  -5   1  -7    0.35    0.07 
   5   1   7    0.42    0.07 
  -5   1  -7    0.22    0.07 
  -5  -1  -7    0.33    0.07 
   5  -1   7    0.39    0.07 
  -5   1  -8    3.31    0.17 
   5   1   8    3.50    0.17 
  -5   1  -8    3.80    0.18 
   5  -1   8    3.84    0.18 
  -5  -1  -8    3.96    0.17 
  -5  -1  -8    3.89    0.18 
  -5   1  -9    1.50    0.13 
  -5   1  -9    1.29    0.14 
   5   1   9    1.21    0.13 
  -5  -1  -9    1.09    0.12 
   5  -1   9    1.28    0.13 
  -5  -1  -9    1.18    0.12 
  -5   1 -10    3.86    0.19 
   5   1  10    3.39    0.19 
  -5   1 -10    4.02    0.20 
  -5  -1 -10    3.53    0.18 
   5  -1  10    3.92    0.20 
  -5  -1 -10    3.83    0.21 
  -5   1 -11    0.09    0.09 
   5   1  11    0.10    0.07 
  -5   1 -11    0.14    0.08 
  -5  -1 -11    0.02    0.08 
  -5  -1 -11    0.08    0.07 
   5  -1  11    0.01    0.06 
   5   1  12   -0.02    0.07 
  -5   1 -12    0.05    0.09 
   5  -1  12    0.05    0.07 
  -5  -1 -12    0.02    0.09 
   5   1  13    0.13    0.09 
  -5   1 -13   -0.01    0.09 
  -5  -1 -13    0.15    0.10 
   5  -1  13    0.14    0.08 
   5   1  14    4.62    0.26 
  -5   1 -14    4.71    0.27 
   5  -1  14    3.55    0.23 
  -5  -1 -14    4.42    0.26 
  -5   1 -15    3.46    0.27 
  -5  -2  17    0.36    0.11 
  -5   2  16    0.05    0.09 
   5   2 -16   -0.09    0.12 
   5  -2 -16    0.08    0.11 
  -5  -2  16    0.06    0.08 
  -5   2  15    1.47    0.16 
   5   2 -15    1.12    0.16 
   5  -2 -15    1.05    0.15 
  -5  -2  15    1.12    0.14 
   5   2 -14    0.04    0.10 
  -5   2  14    0.04    0.08 
  -5  -2  14    0.20    0.08 
   5  -2 -14    0.09    0.09 
  -5   2  13    0.47    0.10 
   5   2 -13    0.36    0.11 
  -5  -2  13    0.53    0.10 
  -5  -2  13    0.34    0.08 
   5  -2 -13    0.54    0.11 
   5   2 -12    0.54    0.11 
  -5   2  12    0.48    0.09 
  -5   2  12    0.51    0.08 
   5  -2 -12    0.40    0.10 
  -5  -2  12    0.64    0.09 
  -5  -2  12    0.50    0.09 
   5   2 -11    2.90    0.18 
  -5   2  11    2.75    0.16 
  -5   2  11    2.95    0.14 
  -5  -2  11    3.09    0.16 
  -5  -2  11    3.07    0.15 
   5  -2 -11    3.09    0.18 
   5   2 -10    0.84    0.11 
  -5   2  10    0.64    0.08 
  -5   2  10    0.59    0.09 
  -5  -2  10    0.79    0.09 
  -5  -2  10    0.76    0.09 
   5  -2 -10    1.02    0.11 
  -5   2   9    0.97    0.11 
  -5   2   9    0.79    0.08 
   5   2  -9    0.68    0.10 
   5  -2  -9    0.82    0.10 
  -5  -2   9    0.73    0.08 
  -5  -2   9    0.83    0.09 
  -5   2   8    0.64    0.08 
   5   2  -8    0.55    0.09 
  -5   2   8    0.47    0.06 
   5  -2  -8    0.42    0.08 
  -5  -2   8    0.65    0.07 
  -5  -2   8    0.50    0.07 
   5   2  -7    3.08    0.07 
  -5   2   7    2.59    0.11 
  -5   2   7    2.81    0.13 
   5   2  -7    2.93    0.15 
   5  -2  -7    2.80    0.08 
  -5  -2   7    3.26    0.13 
   5  -2  -7    3.15    0.13 
  -5  -2   7    3.16    0.12 
   5   2  -6   11.53    0.21 
  -5   2   6   11.59    0.21 
  -5   2   6   11.51    0.26 
   5   2  -6   11.09    0.28 
  -5   2   6   11.20    0.28 
  -5  -2   6   11.51    0.26 
   5  -2  -6   10.71    0.26 
  -5  -2   6   10.83    0.26 
  -5   2   5   34.51    0.66 
  -5   2   5   34.72    0.63 
   5   2  -5   35.97    0.59 
  -5   2   5   36.51    0.60 
   5   2  -5   34.49    0.65 
  -5  -2   5   35.94    0.64 
  -5  -2   5   35.47    0.64 
   5  -2  -5   35.08    0.63 
  -5   2   4   30.95    0.52 
  -5   2   4   30.02    0.55 
   5   2  -4   30.18    0.57 
  -5  -2   4   29.84    0.55 
   5  -2  -4   30.45    0.58 
  -5  -2   4   30.75    0.55 
  -5  -2   4   31.13    0.52 
   5  -2  -4   30.35    0.54 
  -5   2   3    1.13    0.06 
   5   2  -3    0.97    0.06 
  -5   2   3    0.98    0.06 
   5   2  -3    1.11    0.08 
   5  -2  -3    1.11    0.06 
  -5  -2   3    0.94    0.05 
   5  -2  -3    1.15    0.08 
  -5  -2   3    0.96    0.07 
   5   2  -2    1.52    0.07 
   5   2  -2    1.41    0.08 
  -5   2   2    1.57    0.07 
  -5  -2   2    1.45    0.07 
   5  -2  -2    1.36    0.09 
   5  -2  -2    1.56    0.06 
  -5  -2   2    1.48    0.07 
  -5   2   1   19.16    0.36 
  -5   2   1   19.34    0.36 
   5   2  -1   19.02    0.37 
   5   2  -1   19.15    0.35 
   5  -2  -1   19.27    0.38 
  -5  -2   1   19.15    0.35 
  -5  -2   1   18.83    0.36 
  -5   2   0    6.76    0.18 
   5   2   0    7.33    0.16 
   5   2   0    7.40    0.18 
  -5   2   0    6.99    0.16 
   5  -2   0    7.29    0.19 
  -5  -2   0    7.46    0.18 
  -5  -2   0    7.48    0.16 
   5   2   1   64.90    1.10 
  -5   2  -1   65.47    1.07 
  -5   2  -1   64.49    1.11 
   5   2   1   64.74    1.11 
   5  -2   1   64.35    1.13 
  -5  -2  -1   63.91    1.10 
  -5  -2  -1   67.39    1.05 
  -5   2  -2    5.40    0.16 
  -5   2  -2    5.93    0.13 
  -5   2  -2    5.69    0.14 
   5   2   2    5.71    0.16 
   5   2   2    5.49    0.15 
  -5  -2  -2    5.75    0.11 
  -5  -2  -2    5.31    0.16 
   5   2   3    0.06    0.03 
  -5   2  -3    0.05    0.03 
   5   2   3    0.05    0.04 
  -5   2  -3    0.02    0.04 
   5  -2   3    0.09    0.03 
  -5  -2  -3    0.01    0.04 
   5  -2   3    0.07    0.04 
   5   2   4    0.01    0.04 
  -5   2  -4    0.05    0.04 
   5   2   4   -0.03    0.03 
  -5   2  -4    0.09    0.04 
  -5  -2  -4    0.01    0.04 
   5  -2   4    0.01    0.03 
   5  -2   4    0.07    0.04 
  -5   2  -5    0.63    0.07 
   5   2   5    0.73    0.08 
   5   2   5    0.60    0.07 
  -5   2  -5    0.77    0.08 
   5  -2   5    0.62    0.07 
   5  -2   5    0.77    0.06 
  -5  -2  -5    0.60    0.07 
   5   2   6    3.30    0.14 
   5   2   6    3.30    0.15 
  -5   2  -6    3.30    0.14 
  -5   2  -6    3.38    0.15 
   5  -2   6    3.41    0.11 
  -5  -2  -6    3.42    0.15 
   5  -2   6    2.97    0.14 
  -5   2  -7    0.76    0.09 
   5   2   7    0.50    0.08 
  -5   2  -7    0.74    0.09 
   5   2   7    0.70    0.09 
  -5  -2  -7    0.57    0.08 
   5  -2   7    0.79    0.10 
   5   2   8    0.09    0.06 
   5   2   8    0.12    0.06 
  -5   2  -8    0.12    0.06 
  -5   2  -8    0.14    0.07 
  -5  -2  -8    0.10    0.06 
   5  -2   8    0.11    0.06 
  -5   2  -9    3.64    0.18 
  -5   2  -9    4.31    0.19 
   5   2   9    3.84    0.19 
  -5  -2  -9    3.75    0.19 
   5  -2   9    3.64    0.18 
  -5  -2  -9    3.36    0.17 
  -5   2 -10    0.03    0.08 
  -5   2 -10    0.09    0.07 
   5   2  10    0.04    0.06 
   5  -2  10    0.03    0.06 
  -5  -2 -10    0.04    0.07 
  -5  -2 -10    0.04    0.08 
   5   2  11    0.04    0.07 
  -5   2 -11   -0.02    0.08 
  -5   2 -11    0.08    0.07 
  -5  -2 -11   -0.05    0.06 
  -5  -2 -11   -0.02    0.08 
   5  -2  11    0.02    0.07 
  -5   2 -12    0.98    0.14 
   5   2  12    0.97    0.13 
  -5  -2 -12    0.93    0.14 
   5  -2  12    0.58    0.11 
  -5   2 -13    0.50    0.13 
   5   2  13    0.43    0.11 
   5  -2  13    0.44    0.11 
  -5  -2 -13    0.23    0.11 
   5   2  14    2.71    0.22 
  -5   2 -14    3.09    0.24 
  -5  -2 -14    2.86    0.25 
   5  -2  14    2.42    0.21 
  -5   2 -15    0.91    0.16 
  -5  -3  17    0.08    0.09 
  -5   3  16    1.28    0.16 
   5   3 -16    1.00    0.17 
   5  -3 -16    1.05    0.16 
  -5  -3  16    1.04    0.14 
   5   3 -15   -0.13    0.11 
  -5   3  15    0.15    0.09 
   5  -3 -15    0.06    0.10 
  -5  -3  15    0.03    0.07 
   5   3 -14    0.01    0.11 
  -5   3  14   -0.02    0.07 
  -5  -3  14    0.02    0.07 
   5  -3 -14    0.08    0.09 
   5   3 -13    0.03    0.10 
  -5   3  13   -0.05    0.06 
  -5  -3  13   -0.02    0.06 
  -5  -3  13    0.04    0.06 
   5  -3 -13    0.08    0.09 
   5   3 -12    0.30    0.11 
  -5   3  12    0.40    0.09 
  -5   3  12    0.29    0.07 
   5  -3 -12    0.21    0.09 
  -5  -3  12    0.27    0.07 
  -5  -3  12    0.32    0.08 
   5   3 -11    6.86    0.27 
  -5   3  11    6.48    0.25 
  -5   3  11    7.07    0.22 
  -5  -3  11    6.83    0.24 
   5  -3 -11    7.00    0.25 
  -5  -3  11    6.31    0.22 
  -5   3  10    0.93    0.09 
  -5   3  10    1.04    0.12 
   5   3 -10    0.86    0.12 
  -5  -3  10    0.95    0.10 
  -5  -3  10    0.91    0.10 
   5  -3 -10    1.03    0.11 
   5   3  -9    2.45    0.17 
  -5   3   9    2.53    0.12 
  -5   3   9    2.37    0.15 
  -5  -3   9    2.50    0.13 
  -5  -3   9    2.55    0.13 
   5  -3  -9    2.25    0.14 
  -5   3   8    0.01    0.04 
   5   3  -8    0.03    0.07 
  -5   3   8    0.05    0.05 
  -5  -3   8    0.05    0.04 
   5  -3  -8   -0.05    0.06 
  -5  -3   8   -0.01    0.04 
   5   3  -7   14.61    0.27 
   5   3  -7   14.16    0.35 
  -5   3   7   14.41    0.35 
  -5   3   7   14.31    0.32 
  -5   3   7   14.29    0.28 
  -5  -3   7   13.75    0.32 
  -5  -3   7   14.03    0.32 
   5  -3  -7   13.92    0.32 
  -5   3   6    0.12    0.04 
   5   3  -6    0.07    0.03 
  -5   3   6    0.08    0.03 
  -5   3   6    0.02    0.04 
   5   3  -6    0.11    0.06 
   5  -3  -6    0.04    0.04 
  -5  -3   6    0.05    0.04 
  -5  -3   6    0.05    0.03 
  -5   3   5    9.47    0.23 
  -5   3   5    9.81    0.20 
  -5   3   5    9.36    0.24 
   5   3  -5    9.89    0.20 
  -5  -3   5    9.86    0.22 
  -5  -3   5    9.41    0.23 
   5  -3  -5    9.49    0.22 
   5   3  -4   66.68    1.11 
  -5   3   4   67.18    1.11 
   5   3  -4   64.45    1.14 
  -5   3   4   66.08    1.12 
  -5  -3   4   67.73    1.12 
   5  -3  -4   66.03    1.16 
  -5  -3   4   65.05    1.12 
   5  -3  -4   66.34    1.10 
  -5   3   3    6.27    0.15 
   5   3  -3    6.14    0.15 
  -5   3   3    6.19    0.16 
   5   3  -3    6.13    0.18 
   5   3  -3    6.29    0.14 
   5  -3  -3    6.06    0.14 
  -5  -3   3    6.15    0.16 
   5  -3  -3    6.17    0.18 
   5   3  -2    7.10    0.15 
  -5   3   2    7.03    0.17 
   5   3  -2    6.89    0.18 
  -5   3   2    6.73    0.17 
   5  -3  -2    6.58    0.18 
  -5  -3   2    6.84    0.17 
   5  -3  -2    7.04    0.13 
  -5  -3   2    6.84    0.17 
  -5   3   1    7.57    0.19 
   5   3  -1    7.90    0.16 
  -5   3   1    7.58    0.19 
   5   3  -1    7.89    0.19 
   5  -3  -1    7.76    0.20 
  -5  -3   1    7.88    0.18 
  -5  -3   1    7.70    0.19 
   5   3   0    0.47    0.05 
  -5   3   0    0.57    0.06 
   5   3   0    0.60    0.04 
  -5   3   0    0.47    0.05 
   5  -3   0    0.49    0.06 
  -5  -3   0    0.56    0.06 
  -5  -3   0    0.57    0.05 
  -5   3  -1    0.19    0.04 
   5   3   1    0.24    0.05 
   5   3   1    0.24    0.03 
  -5   3  -1    0.21    0.04 
  -5   3  -1    0.29    0.03 
  -5  -3  -1    0.21    0.05 
  -5  -3  -1    0.20    0.03 
   5  -3   1    0.23    0.05 
  -5   3  -2    4.10    0.10 
   5   3   2    4.05    0.12 
   5   3   2    4.15    0.14 
  -5   3  -2    3.88    0.14 
  -5  -3  -2    4.07    0.10 
   5  -3   2    4.08    0.14 
   5  -3   2    4.12    0.12 
   5   3   3    0.90    0.08 
   5   3   3    1.11    0.07 
  -5   3  -3    0.91    0.06 
  -5   3  -3    0.83    0.08 
  -5  -3  -3    0.99    0.04 
  -5  -3  -3    1.01    0.09 
   5  -3   3    1.00    0.07 
   5  -3   3    1.01    0.08 
   5   3   4    0.78    0.08 
   5   3   4    1.05    0.08 
  -5   3  -4    0.94    0.09 
  -5   3  -4    0.92    0.07 
   5  -3   4    0.96    0.07 
   5  -3   4    0.93    0.08 
  -5  -3  -4    0.76    0.08 
  -5   3  -5   10.50    0.28 
   5   3   5   10.59    0.28 
   5   3   5   10.97    0.27 
  -5   3  -5   10.98    0.25 
  -5  -3  -5   10.82    0.28 
   5  -3   5   10.91    0.24 
   5  -3   5   10.91    0.28 
  -5   3  -6    0.18    0.06 
  -5   3  -6    0.18    0.06 
   5   3   6    0.26    0.06 
   5   3   6    0.21    0.06 
   5  -3   6    0.09    0.05 
   5  -3   6    0.20    0.05 
  -5  -3  -6    0.29    0.07 
   5   3   7    1.01    0.11 
  -5   3  -7    1.05    0.11 
   5   3   7    1.16    0.11 
  -5   3  -7    1.10    0.12 
   5  -3   7    1.24    0.11 
  -5  -3  -7    0.94    0.10 
  -5   3  -8    0.03    0.06 
  -5   3  -8    0.03    0.07 
   5   3   8    0.10    0.06 
   5   3   8    0.11    0.06 
  -5  -3  -8    0.11    0.07 
   5  -3   8    0.01    0.05 
  -5   3  -9   -0.02    0.06 
   5   3   9   -0.01    0.06 
  -5   3  -9    0.06    0.07 
   5   3   9   -0.02    0.06 
   5  -3   9    0.04    0.06 
  -5  -3  -9    0.02    0.06 
  -5   3 -10    3.75    0.19 
   5   3  10    3.01    0.18 
  -5   3 -10    3.89    0.20 
  -5  -3 -10    3.24    0.18 
  -5  -3 -10    3.28    0.20 
   5  -3  10    3.15    0.19 
  -5   3 -11   -0.04    0.07 
  -5   3 -11    0.05    0.08 
   5   3  11    0.06    0.07 
  -5  -3 -11    0.02    0.07 
  -5  -3 -11    0.06    0.08 
   5  -3  11   -0.02    0.06 
  -5   3 -12    2.89    0.20 
   5   3  12    2.62    0.19 
   5  -3  12    2.81    0.19 
  -5  -3 -12    2.81    0.21 
   5   3  13   -0.05    0.07 
  -5   3 -13    0.02    0.10 
   5  -3  13    0.04    0.08 
  -5  -3 -13    0.03    0.10 
  -5   3 -14    0.00    0.11 
   5   3  14   -0.05    0.08 
  -5  -3 -14   -0.11    0.10 
   5  -3  14   -0.03    0.08 
  -5   3 -15    0.60    0.14 
  -5  -4  17    0.90    0.14 
   5   4 -16    0.09    0.13 
  -5   4  16   -0.02    0.08 
   5  -4 -16   -0.01    0.11 
  -5  -4  16    0.02    0.08 
   5   4 -15    2.76    0.24 
  -5   4  15    3.13    0.22 
  -5  -4  15    3.07    0.20 
   5  -4 -15    2.96    0.23 
  -5   4  14   -0.05    0.07 
   5   4 -14    0.21    0.12 
   5  -4 -14   -0.06    0.08 
  -5  -4  14    0.06    0.07 
   5   4 -13   -0.01    0.10 
  -5   4  13    0.14    0.08 
   5  -4 -13    0.29    0.10 
  -5  -4  13    0.17    0.07 
  -5  -4  13    0.10    0.06 
   5   4 -12    1.96    0.20 
  -5   4  12    2.26    0.17 
   5  -4 -12    2.06    0.17 
  -5  -4  12    2.19    0.15 
  -5  -4  12    2.17    0.15 
   5   4 -11    0.14    0.10 
  -5   4  11    0.35    0.08 
  -5   4  11    0.19    0.06 
  -5  -4  11    0.28    0.07 
   5  -4 -11    0.30    0.09 
  -5  -4  11    0.16    0.06 
   5   4 -10    0.77    0.12 
  -5   4  10    0.86    0.10 
  -5   4  10    0.63    0.10 
  -5  -4  10    0.67    0.09 
  -5  -4  10    0.93    0.10 
   5  -4 -10    0.91    0.11 
  -5   4   9    0.05    0.06 
  -5   4   9    0.10    0.05 
   5   4  -9    0.07    0.09 
   5  -4  -9   -0.01    0.06 
  -5  -4   9    0.09    0.05 
  -5  -4   9    0.12    0.05 
  -5   4   8    0.05    0.04 
   5   4  -8    0.06    0.08 
  -5   4   8    0.09    0.06 
  -5  -4   8    0.09    0.05 
   5  -4  -8    0.19    0.07 
  -5  -4   8    0.09    0.05 
   5  -4  -8    0.04    0.04 
  -5   4   7    0.15    0.04 
   5   4  -7    0.15    0.04 
  -5   4   7    0.08    0.04 
  -5   4   7    0.15    0.06 
   5   4  -7    0.13    0.07 
  -5  -4   7    0.11    0.04 
  -5  -4   7    0.16    0.05 
   5  -4  -7    0.17    0.06 
  -5   4   6    2.51    0.13 
  -5   4   6    2.56    0.10 
   5   4  -6    2.61    0.10 
  -5   4   6    2.70    0.12 
   5   4  -6    2.81    0.14 
   5  -4  -6    2.67    0.12 
  -5  -4   6    2.80    0.10 
  -5  -4   6    2.50    0.12 
   5   4  -5    3.63    0.15 
  -5   4   5    3.89    0.14 
   5   4  -5    3.71    0.12 
  -5   4   5    3.87    0.12 
  -5  -4   5    3.77    0.14 
   5  -4  -5    3.80    0.12 
  -5  -4   5    4.00    0.11 
   5  -4  -5    3.70    0.15 
   5   4  -4    2.59    0.13 
   5   4  -4    2.39    0.09 
  -5   4   4    2.32    0.10 
  -5   4   4    2.31    0.10 
  -5  -4   4    2.22    0.10 
  -5  -4   4    2.42    0.08 
   5  -4  -4    2.08    0.09 
   5  -4  -4    2.29    0.12 
  -5   4   3   31.01    0.56 
   5   4  -3   31.39    0.53 
   5   4  -3   30.00    0.58 
   5   4  -3   30.48    0.56 
  -5   4   3   30.91    0.57 
   5  -4  -3   30.64    0.59 
  -5  -4   3   29.92    0.56 
   5  -4  -3   31.23    0.53 
  -5   4   2    3.08    0.11 
   5   4  -2    3.20    0.12 
  -5   4   2    3.04    0.12 
   5   4  -2    2.93    0.11 
   5   4  -2    3.40    0.08 
   5  -4  -2    3.12    0.13 
  -5  -4   2    3.04    0.12 
   5  -4  -2    3.07    0.08 
  -5   4   1    2.94    0.12 
   5   4  -1    3.13    0.07 
  -5   4   1    2.97    0.11 
   5   4  -1    3.03    0.12 
  -5  -4   1    2.97    0.11 
  -5  -4   1    3.10    0.12 
   5  -4  -1    3.19    0.13 
   5   4   0    2.12    0.07 
  -5   4   0    2.12    0.10 
  -5   4   0    2.02    0.10 
   5   4   0    1.94    0.10 
  -5  -4   0    2.14    0.10 
   5  -4   0    2.20    0.11 
  -5  -4   0    2.18    0.09 
  -5   4  -1   24.52    0.49 
   5   4   1   24.70    0.49 
   5   4   1   25.37    0.45 
  -5   4  -1   24.73    0.47 
  -5  -4  -1   24.87    0.45 
   5  -4   1   25.01    0.49 
  -5  -4  -1   25.08    0.49 
  -5   4  -2   23.42    0.41 
  -5   4  -2   22.65    0.47 
   5   4   2   23.48    0.47 
   5   4   2   23.80    0.44 
  -5  -4  -2   22.83    0.47 
  -5  -4  -2   24.11    0.42 
   5  -4   2   23.45    0.47 
   5  -4   2   23.21    0.45 
   5   4   3    6.30    0.17 
  -5   4  -3    6.49    0.15 
   5   4   3    6.11    0.19 
  -5   4  -3    6.24    0.19 
  -5  -4  -3    6.18    0.14 
  -5  -4  -3    5.97    0.19 
   5  -4   3    6.29    0.17 
   5  -4   3    6.24    0.19 
   5   4   4    2.05    0.10 
  -5   4  -4    1.97    0.12 
  -5   4  -4    1.89    0.10 
   5   4   4    1.88    0.11 
   5  -4   4    1.97    0.12 
  -5  -4  -4    1.72    0.12 
   5  -4   4    2.06    0.10 
  -5  -4  -4    1.98    0.07 
  -5   4  -5    0.36    0.07 
  -5   4  -5    0.26    0.06 
   5   4   5    0.37    0.06 
   5   4   5    0.37    0.07 
   5  -4   5    0.39    0.07 
   5  -4   5    0.35    0.06 
  -5  -4  -5    0.27    0.06 
   5   4   6    0.37    0.07 
  -5   4  -6    0.25    0.06 
   5   4   6    0.31    0.07 
  -5   4  -6    0.28    0.07 
   5  -4   6    0.33    0.06 
   5  -4   6    0.36    0.07 
  -5  -4  -6    0.43    0.08 
   5   4   7    1.95    0.13 
  -5   4  -7    1.73    0.13 
  -5   4  -7    1.81    0.13 
   5   4   7    1.86    0.13 
  -5  -4  -7    1.84    0.14 
   5  -4   7    1.88    0.13 
   5  -4   7    1.76    0.11 
  -5   4  -8   11.16    0.30 
  -5   4  -8   10.84    0.31 
   5   4   8   10.60    0.32 
   5   4   8   11.44    0.32 
  -5  -4  -8   11.11    0.32 
   5  -4   8   11.18    0.32 
   5   4   9    5.07    0.22 
  -5   4  -9    4.74    0.21 
  -5   4  -9    5.11    0.21 
   5   4   9    4.98    0.22 
  -5  -4  -9    4.78    0.21 
   5  -4   9    5.02    0.22 
  -5   4 -10    0.24    0.09 
  -5   4 -10    0.15    0.07 
   5   4  10    0.13    0.08 
   5   4  10    0.27    0.09 
   5  -4  10    0.04    0.07 
  -5  -4 -10    0.24    0.08 
  -5  -4 -10    0.24    0.09 
  -5   4 -11    0.77    0.12 
   5   4  11    1.23    0.14 
  -5   4 -11    0.98    0.13 
  -5  -4 -11    1.10    0.13 
  -5  -4 -11    1.11    0.14 
   5  -4  11    1.07    0.13 
   5   4  12    0.05    0.08 
  -5   4 -12    0.09    0.10 
   5  -4  12   -0.10    0.07 
  -5  -4 -12    0.09    0.09 
   5   4  13    0.12    0.08 
   5  -4  13    0.03    0.08 
  -5  -4 -13    0.00    0.10 
   5   4  14    0.78    0.15 
   5  -4  14    0.83    0.14 
  -5  -4 -14    0.85    0.15 
   5  -5 -16    0.57    0.14 
  -5   5  15    0.03    0.09 
   5   5 -15    0.21    0.13 
   5  -5 -15    0.22    0.11 
   5   5 -14    0.12    0.12 
  -5   5  14    0.11    0.08 
   5  -5 -14    0.01    0.09 
  -5  -5  14    0.03    0.07 
  -5   5  13    0.26    0.10 
   5   5 -13    0.40    0.13 
  -5  -5  13    0.17    0.07 
   5  -5 -13    0.25    0.10 
  -5  -5  13    0.48    0.09 
  -5   5  12    1.20    0.14 
   5   5 -12    0.95    0.15 
  -5  -5  12    1.13    0.12 
   5  -5 -12    1.14    0.13 
  -5  -5  12    1.29    0.13 
  -5   5  11    1.52    0.12 
  -5   5  11    1.54    0.15 
   5   5 -11    1.54    0.16 
  -5  -5  11    1.47    0.12 
  -5  -5  11    1.47    0.13 
   5  -5 -11    1.30    0.15 
   5   5 -10    2.46    0.18 
  -5   5  10    2.15    0.16 
  -5   5  10    2.32    0.13 
   5  -5 -10    2.48    0.16 
  -5  -5  10    2.49    0.14 
  -5  -5  10    2.12    0.14 
  -5   5   9    0.00    0.06 
   5   5  -9   -0.04    0.08 
  -5   5   9    0.01    0.05 
  -5  -5   9    0.04    0.06 
   5  -5  -9    0.06    0.07 
  -5  -5   9   -0.06    0.04 
   5   5  -8    0.27    0.09 
  -5   5   8    0.24    0.06 
  -5   5   8    0.28    0.07 
   5   5  -8    0.30    0.05 
  -5  -5   8    0.26    0.07 
   5  -5  -8    0.12    0.07 
  -5  -5   8    0.32    0.06 
  -5   5   7    1.59    0.12 
   5   5  -7    1.30    0.09 
   5   5  -7    1.04    0.12 
  -5   5   7    1.51    0.09 
  -5   5   7    1.42    0.10 
  -5  -5   7    1.54    0.09 
  -5  -5   7    1.37    0.11 
   5  -5  -7    1.55    0.11 
   5   5  -6    0.04    0.07 
  -5   5   6    0.03    0.04 
  -5   5   6   -0.01    0.05 
   5   5  -6   -0.01    0.03 
  -5   5   6   -0.03    0.03 
  -5  -5   6    0.02    0.03 
  -5  -5   6    0.05    0.05 
   5  -5  -6   -0.05    0.04 
   5   5  -5    0.89    0.10 
  -5   5   5    1.07    0.08 
   5   5  -5    0.93    0.07 
  -5   5   5    0.89    0.08 
   5  -5  -5    0.88    0.08 
   5  -5  -5    0.89    0.10 
  -5  -5   5    0.92    0.06 
  -5  -5   5    0.93    0.09 
   5   5  -4    0.20    0.03 
  -5   5   4    0.16    0.04 
   5   5  -4    0.29    0.06 
  -5   5   4    0.15    0.05 
   5   5  -4    0.19    0.04 
  -5  -5   4    0.25    0.05 
   5  -5  -4    0.15    0.05 
   5  -5  -4    0.17    0.04 
   5   5  -3    1.06    0.09 
  -5   5   3    1.03    0.08 
  -5   5   3    1.09    0.08 
   5   5  -3    0.89    0.07 
   5  -5  -3    0.95    0.06 
  -5  -5   3    0.99    0.08 
   5  -5  -3    0.97    0.09 
  -5   5   2    2.19    0.06 
   5   5  -2    2.01    0.11 
   5   5  -2    2.05    0.10 
  -5   5   2    2.31    0.11 
  -5   5   2    2.10    0.11 
   5  -5  -2    2.32    0.11 
  -5  -5   2    2.06    0.10 
  -5   5   1    2.85    0.12 
   5   5  -1    3.07    0.12 
  -5   5   1    3.04    0.12 
   5   5  -1    2.87    0.13 
  -5  -5   1    3.00    0.12 
   5  -5  -1    2.86    0.13 
  -5   5   0    2.24    0.11 
   5   5   0    2.33    0.11 
   5   5   0    2.47    0.07 
  -5   5   0    2.31    0.11 
  -5  -5   0    2.25    0.11 
   5  -5   0    2.34    0.12 
  -5  -5   0    2.24    0.10 
   5   5   1    5.21    0.13 
  -5   5  -1    5.04    0.17 
  -5   5  -1    5.25    0.11 
   5   5   1    5.16    0.17 
   5  -5   1    5.17    0.17 
  -5  -5  -1    5.27    0.15 
  -5  -5  -1    5.28    0.17 
   5  -5   1    5.21    0.17 
   5   5   2    5.40    0.18 
   5   5   2    5.80    0.15 
  -5   5  -2    5.89    0.19 
  -5   5  -2    5.69    0.13 
  -5  -5  -2    5.34    0.18 
  -5  -5  -2    5.68    0.15 
   5  -5   2    5.60    0.18 
   5  -5   2    5.79    0.18 
  -5   5  -3   28.58    0.51 
  -5   5  -3   27.25    0.57 
   5   5   3   29.64    0.54 
   5   5   3   28.35    0.57 
   5  -5   3   28.59    0.57 
  -5  -5  -3   28.96    0.51 
  -5  -5  -3   28.25    0.57 
   5  -5   3   28.24    0.55 
  -5   5  -4   13.95    0.29 
   5   5   4   13.95    0.31 
   5   5   4   13.77    0.34 
  -5   5  -4   14.43    0.35 
   5  -5   4   13.84    0.32 
   5  -5   4   13.74    0.33 
  -5  -5  -4   14.28    0.35 
  -5  -5  -4   14.16    0.28 
  -5   5  -5    4.17    0.18 
   5   5   5    4.44    0.18 
  -5   5  -5    3.98    0.15 
   5   5   5    4.28    0.16 
  -5  -5  -5    4.40    0.18 
   5  -5   5    4.13    0.16 
   5  -5   5    4.40    0.17 
   5   5   6    1.96    0.12 
  -5   5  -6    1.68    0.12 
   5   5   6    1.69    0.13 
  -5   5  -6    1.64    0.13 
   5  -5   6    1.60    0.12 
  -5  -5  -6    1.85    0.14 
   5  -5   6    1.65    0.11 
   5   5   7    0.95    0.11 
   5   5   7    1.16    0.12 
  -5   5  -7    1.07    0.12 
  -5   5  -7    1.11    0.13 
   5  -5   7    1.13    0.12 
  -5  -5  -7    0.99    0.11 
   5  -5   7    1.04    0.10 
   5   5   8    0.11    0.07 
   5   5   8    0.13    0.06 
  -5   5  -8    0.11    0.07 
  -5   5  -8    0.09    0.07 
  -5  -5  -8    0.13    0.07 
   5  -5   8    0.08    0.06 
   5   5   9    0.84    0.11 
  -5   5  -9    0.96    0.11 
   5   5   9    1.26    0.13 
  -5   5  -9    0.95    0.12 
   5  -5   9    1.07    0.12 
  -5  -5  -9    1.24    0.14 
   5   5  10    0.10    0.07 
  -5   5 -10   -0.10    0.06 
   5   5  10   -0.05    0.06 
   5  -5  10    0.02    0.06 
  -5  -5 -10    0.12    0.08 
  -5   5 -11    0.37    0.10 
   5   5  11    0.37    0.10 
   5  -5  11    0.38    0.09 
  -5  -5 -11    0.31    0.09 
  -5  -5 -11    0.49    0.12 
   5   5  12    0.53    0.11 
  -5  -5 -12    0.33    0.11 
   5  -5  12    0.44    0.11 
   5   5  13    0.31    0.10 
  -5  -5 -13    0.28    0.12 
   5  -5  13    0.27    0.10 
   5   5  14    0.36    0.12 
   5  -5  14    0.46    0.12 
  -5   6  15    0.13    0.10 
   5   6 -15    0.20    0.14 
   5  -6 -15   -0.07    0.10 
  -5   6  14    1.85    0.19 
   5   6 -14    2.18    0.23 
   5  -6 -14    2.26    0.20 
  -5  -6  14    1.73    0.16 
  -5   6  13    0.60    0.12 
   5   6 -13    0.50    0.14 
   5  -6 -13    0.68    0.13 
  -5  -6  13    0.70    0.11 
   5   6 -12    1.67    0.18 
  -5   6  12    1.89    0.17 
  -5  -6  12    2.17    0.16 
   5  -6 -12    1.97    0.17 
  -5   6  11    1.69    0.13 
   5   6 -11    1.50    0.16 
  -5   6  11    1.32    0.14 
  -5  -6  11    1.45    0.13 
   5  -6 -11    1.27    0.14 
   5   6 -10    0.14    0.10 
  -5   6  10    0.04    0.06 
  -5   6  10    0.15    0.07 
   5  -6 -10    0.16    0.07 
  -5  -6  10    0.13    0.07 
  -5   6   9    0.26    0.07 
   5   6  -9    0.46    0.11 
  -5   6   9    0.36    0.08 
  -5  -6   9    0.42    0.08 
   5  -6  -9    0.47    0.08 
  -5   6   8    1.19    0.11 
   5   6  -8    1.07    0.09 
   5   6  -8    1.13    0.13 
  -5   6   8    1.20    0.10 
  -5   6   8    1.17    0.12 
  -5  -6   8    1.04    0.11 
   5  -6  -8    1.11    0.12 
   5   6  -7    0.13    0.08 
   5   6  -7    0.07    0.04 
  -5   6   7    0.07    0.06 
  -5   6   7    0.05    0.05 
  -5   6   7    0.06    0.04 
   5  -6  -7    0.01    0.05 
  -5  -6   7    0.07    0.06 
  -5   6   6   -0.02    0.04 
  -5   6   6    0.00    0.04 
   5   6  -6    0.06    0.07 
   5   6  -6   -0.07    0.04 
   5  -6  -6    0.08    0.06 
  -5  -6   6    0.03    0.05 
   5  -6  -6   -0.04    0.05 
   5   6  -5    0.52    0.06 
  -5   6   5    0.62    0.07 
  -5   6   5    0.58    0.08 
   5   6  -5    0.44    0.08 
   5  -6  -5    0.40    0.08 
   5  -6  -5    0.43    0.06 
  -5  -6   5    0.48    0.08 
  -5   6   4    0.37    0.06 
   5   6  -4    0.33    0.06 
  -5   6   4    0.43    0.05 
  -5   6   4    0.58    0.08 
   5   6  -4    0.45    0.08 
   5  -6  -4    0.36    0.07 
  -5  -6   4    0.48    0.07 
  -5   6   3    0.23    0.04 
  -5   6   3    0.15    0.05 
   5   6  -3    0.18    0.05 
  -5   6   3    0.21    0.05 
   5   6  -3    0.19    0.06 
   5  -6  -3    0.17    0.06 
  -5  -6   3    0.17    0.06 
  -5   6   2    2.63    0.12 
  -5   6   2    2.42    0.08 
   5   6  -2    2.27    0.12 
  -5   6   2    2.35    0.12 
   5   6  -2    2.35    0.12 
  -5  -6   2    2.29    0.12 
   5  -6  -2    2.38    0.12 
  -5   6   1    0.31    0.06 
   5   6  -1    0.44    0.06 
  -5   6   1    0.35    0.06 
   5   6  -1    0.49    0.07 
  -5   6   1    0.32    0.03 
  -5  -6   1    0.45    0.06 
   5  -6  -1    0.37    0.07 
   5   6   0    0.13    0.05 
  -5   6   0    0.10    0.05 
   5   6   0    0.04    0.05 
   5  -6   0    0.12    0.05 
   5  -6   0    0.19    0.06 
  -5  -6   0    0.09    0.05 
  -5   6  -1    7.37    0.22 
   5   6   1    7.04    0.21 
  -5  -6  -1    6.71    0.22 
  -5  -6  -1    7.06    0.19 
   5  -6   1    7.35    0.21 
   5  -6   1    7.17    0.21 
   5   6   2    0.07    0.05 
  -5   6  -2    0.08    0.06 
   5   6   2    0.02    0.03 
   5  -6   2    0.01    0.05 
  -5  -6  -2    0.09    0.06 
   5  -6   2    0.04    0.05 
  -5  -6  -2    0.04    0.04 
   5   6   3    2.98    0.15 
  -5   6  -3    3.18    0.15 
   5   6   3    3.33    0.12 
   5  -6   3    2.99    0.14 
  -5  -6  -3    3.02    0.16 
   5  -6   3    3.14    0.14 
  -5  -6  -3    3.22    0.12 
   5   6   4    0.44    0.08 
   5   6   4    0.41    0.06 
  -5   6  -4    0.32    0.07 
   5  -6   4    0.38    0.07 
  -5  -6  -4    0.33    0.08 
   5  -6   4    0.42    0.07 
  -5  -6  -4    0.51    0.06 
   5   6   5    0.00    0.04 
   5   6   5    0.09    0.06 
  -5   6  -5   -0.04    0.06 
  -5  -6  -5    0.04    0.06 
   5  -6   5   -0.01    0.05 
   5  -6   5    0.02    0.06 
   5   6   6   -0.06    0.04 
   5   6   6   -0.02    0.05 
  -5   6  -6    0.09    0.07 
   5  -6   6    0.10    0.06 
  -5  -6  -6    0.05    0.07 
   5  -6   6    0.05    0.06 
   5   6   7    0.29    0.07 
   5   6   7    0.33    0.08 
  -5   6  -7    0.49    0.09 
   5  -6   7    0.34    0.07 
  -5  -6  -7    0.30    0.08 
   5  -6   7    0.27    0.07 
   5   6   8    2.86    0.16 
  -5   6  -8    2.83    0.17 
   5   6   8    2.93    0.17 
   5  -6   8    2.86    0.17 
  -5  -6  -8    2.63    0.17 
   5   6   9    0.04    0.06 
   5   6   9    0.01    0.07 
  -5   6  -9   -0.05    0.06 
  -5  -6  -9   -0.02    0.07 
   5  -6   9    0.01    0.06 
  -5   6 -10    0.01    0.08 
   5   6  10    0.11    0.08 
   5   6  10    0.09    0.07 
   5  -6  10    0.11    0.07 
  -5  -6 -10    0.28    0.09 
   5   6  11    0.46    0.10 
   5   6  11    0.39    0.11 
  -5   6 -11    0.57    0.11 
  -5  -6 -11    0.46    0.11 
   5  -6  11    0.37    0.09 
   5   6  12    0.50    0.11 
   5  -6  12    0.41    0.11 
  -5  -6 -12    0.70    0.13 
   5   6  13    0.11    0.09 
  -5  -6 -13    0.01    0.10 
   5  -6  13   -0.03    0.07 
  -5   7  15    0.12    0.11 
   5   7 -15   -0.13    0.14 
   5  -7 -15   -0.01    0.10 
  -5   7  14    0.07    0.10 
   5   7 -14    0.33    0.14 
   5  -7 -14    0.20    0.11 
  -5  -7  14    0.33    0.10 
   5   7 -13   -0.13    0.11 
  -5   7  13    0.01    0.08 
   5  -7 -13   -0.03    0.08 
  -5  -7  13    0.27    0.09 
  -5   7  12    1.91    0.17 
   5   7 -12    2.01    0.21 
  -5  -7  12    1.76    0.16 
   5  -7 -12    2.29    0.19 
  -5   7  11    0.04    0.08 
   5   7 -11   -0.06    0.10 
  -5  -7  11    0.07    0.08 
   5  -7 -11   -0.02    0.07 
   5   7 -10    2.00    0.20 
  -5   7  10    2.17    0.17 
  -5   7  10    2.35    0.15 
  -5  -7  10    2.39    0.17 
   5  -7 -10    2.20    0.16 
  -5   7   9    2.19    0.16 
   5   7  -9    2.41    0.19 
  -5   7   9    2.08    0.14 
  -5  -7   9    2.22    0.16 
   5  -7  -9    2.34    0.15 
  -5   7   8   -0.04    0.06 
   5   7  -8    0.01    0.08 
  -5   7   8   -0.06    0.05 
   5   7  -8   -0.01    0.05 
  -5   7   8    0.03    0.05 
   5  -7  -8   -0.01    0.07 
  -5  -7   8    0.03    0.06 
   5  -7  -8   -0.08    0.06 
  -5   7   7    4.63    0.18 
   5   7  -7    4.51    0.17 
  -5   7   7    4.89    0.19 
   5   7  -7    4.38    0.21 
  -5  -7   7    4.54    0.20 
   5  -7  -7    4.63    0.20 
   5  -7  -7    5.02    0.18 
   5   7  -6   13.31    0.32 
   5   7  -6   13.63    0.36 
  -5   7   6   12.97    0.32 
  -5   7   6   12.98    0.33 
   5  -7  -6   13.12    0.31 
   5  -7  -6   12.60    0.34 
  -5  -7   6   13.38    0.34 
  -5   7   5    3.85    0.14 
  -5   7   5    3.84    0.16 
   5   7  -5    4.02    0.16 
   5   7  -5    3.86    0.18 
  -5   7   5    3.84    0.17 
  -5  -7   5    4.20    0.18 
   5  -7  -5    3.66    0.17 
   5   7  -4    0.32    0.08 
  -5   7   4    0.40    0.07 
  -5   7   4    0.36    0.07 
   5   7  -4    0.30    0.06 
  -5  -7   4    0.19    0.06 
   5  -7  -4    0.33    0.07 
   5   7  -3    5.67    0.20 
  -5   7   3    5.45    0.19 
  -5   7   3    5.32    0.19 
   5   7  -3    5.22    0.19 
   5  -7  -3    5.71    0.20 
  -5  -7   3    5.42    0.19 
  -5   7   2    1.16    0.10 
  -5   7   2    0.84    0.09 
   5   7  -2    1.01    0.10 
   5   7  -2    0.82    0.09 
  -5  -7   2    0.88    0.10 
   5  -7  -2    0.91    0.10 
   5   7  -1    0.30    0.06 
   5   7  -1    0.29    0.06 
  -5   7   1    0.36    0.07 
   5  -7  -1    0.25    0.07 
  -5  -7   1    0.26    0.06 
   5  -7  -1    0.27    0.07 
   5   7   0    4.94    0.19 
   5   7   0    5.14    0.19 
  -5   7   0    5.17    0.19 
   5  -7   0    5.44    0.19 
  -5  -7   0    5.46    0.18 
   5  -7   0    5.00    0.19 
   5   7   1    1.16    0.11 
  -5   7  -1    1.36    0.12 
   5   7   1    1.33    0.11 
   5  -7   1    1.17    0.11 
   5  -7   1    1.46    0.12 
  -5  -7  -1    1.28    0.10 
  -5  -7  -1    1.41    0.12 
   5   7   2    0.45    0.07 
  -5   7  -2    0.52    0.08 
   5  -7   2    0.44    0.08 
  -5  -7  -2    0.29    0.07 
  -5  -7  -2    0.49    0.07 
   5  -7   2    0.54    0.08 
  -5   7  -3    0.13    0.06 
   5   7   3    0.05    0.06 
   5  -7   3    0.13    0.06 
  -5  -7  -3    0.11    0.05 
  -5  -7  -3    0.10    0.07 
   5  -7   3    0.17    0.07 
  -5   7  -4    1.09    0.12 
   5   7   4    0.76    0.09 
  -5  -7  -4    0.85    0.09 
  -5  -7  -4    0.88    0.11 
   5  -7   4    0.99    0.11 
   5  -7   4    1.07    0.11 
  -5   7  -5    0.12    0.07 
   5   7   5    0.32    0.08 
   5  -7   5    0.24    0.06 
  -5  -7  -5    0.19    0.08 
   5  -7   5    0.29    0.08 
   5   7   6    0.46    0.09 
  -5   7  -6    0.56    0.10 
   5  -7   6    0.53    0.09 
  -5  -7  -6    0.47    0.09 
   5  -7   6    0.53    0.08 
   5   7   7    0.45    0.09 
  -5   7  -7    0.46    0.09 
   5  -7   7    0.28    0.08 
   5  -7   7    0.47    0.09 
  -5  -7  -7    0.35    0.09 
  -5   7  -8    0.05    0.07 
   5   7   8    0.06    0.07 
   5  -7   8    0.01    0.06 
  -5  -7  -8    0.15    0.08 
   5  -7   8    0.01    0.06 
  -5   7  -9    0.66    0.11 
   5   7   9    0.60    0.11 
   5   7   9    0.71    0.12 
  -5  -7  -9    0.61    0.11 
   5  -7   9    0.52    0.10 
  -5   7 -10    0.28    0.09 
   5   7  10    0.34    0.10 
   5   7  10    0.15    0.09 
   5  -7  10    0.33    0.09 
  -5  -7 -10    0.33    0.10 
  -5   7 -11    2.84    0.20 
   5   7  11    2.92    0.23 
   5   7  11    3.11    0.23 
   5  -7  11    3.07    0.21 
  -5  -7 -11    3.29    0.22 
  -5  -7 -12    0.09    0.10 
   5  -7  12   -0.09    0.07 
   5  -7  13    0.01    0.08 
   5  -8 -15   -0.06    0.10 
   5   8 -14    0.25    0.14 
  -5   8  14    0.16    0.10 
  -5  -8  14    0.29    0.11 
   5  -8 -14    0.40    0.12 
   5   8 -13    0.08    0.12 
  -5   8  13    0.29    0.11 
   5  -8 -13   -0.04    0.09 
  -5  -8  13    0.10    0.09 
  -5   8  12    0.86    0.13 
   5   8 -12    0.84    0.15 
  -5  -8  12    0.84    0.13 
   5  -8 -12    0.97    0.13 
  -5   8  11   -0.05    0.07 
   5   8 -11   -0.01    0.10 
  -5  -8  11    0.07    0.07 
   5  -8 -11    0.04    0.08 
   5   8 -10    0.48    0.13 
  -5   8  10    0.37    0.09 
  -5   8  10    0.56    0.11 
  -5  -8  10    0.65    0.11 
   5  -8 -10    0.68    0.11 
   5   8  -9    0.58    0.12 
  -5   8   9    0.60    0.10 
   5  -8  -9    0.66    0.11 
  -5  -8   9    0.78    0.11 
   5  -8  -9    0.60    0.10 
  -5   8   8    0.36    0.08 
   5   8  -8    0.30    0.10 
  -5   8   8    0.28    0.08 
   5   8  -8    0.25    0.07 
   5  -8  -8    0.27    0.08 
   5  -8  -8    0.36    0.09 
  -5  -8   8    0.25    0.08 
  -5   8   7    0.49    0.08 
   5   8  -7    0.72    0.11 
  -5   8   7    0.74    0.09 
   5   8  -7    0.54    0.08 
   5  -8  -7    0.63    0.10 
  -5  -8   7    0.83    0.11 
   5   8  -6    0.02    0.05 
  -5   8   6    0.07    0.06 
   5   8  -6    0.04    0.07 
  -5   8   6    0.15    0.06 
  -5  -8   6    0.06    0.06 
   5  -8  -6    0.00    0.06 
   5   8  -5    0.51    0.10 
  -5   8   5    0.52    0.09 
  -5   8   5    0.52    0.09 
   5   8  -5    0.60    0.08 
   5  -8  -5    0.51    0.09 
  -5  -8   5    0.67    0.10 
  -5   8   4    5.40    0.21 
   5   8  -4    5.59    0.22 
  -5   8   4    5.48    0.21 
   5   8  -4    5.82    0.21 
   5  -8  -4    5.04    0.21 
  -5  -8   4    5.72    0.22 
  -5   8   3    4.43    0.19 
   5   8  -3    4.47    0.18 
  -5   8   3    4.16    0.18 
   5   8  -3    4.27    0.19 
  -5  -8   3    4.45    0.19 
   5  -8  -3    4.48    0.19 
   5  -8  -3    4.80    0.19 
   5   8  -2    0.23    0.07 
   5   8  -2    0.12    0.06 
  -5   8   2    0.21    0.07 
   5  -8  -2    0.22    0.07 
   5  -8  -2    0.16    0.07 
  -5  -8   2    0.21    0.07 
   5   8  -1    0.83    0.10 
  -5   8   1    1.11    0.11 
   5   8  -1    0.69    0.09 
   5  -8  -1    1.10    0.12 
  -5  -8   1    0.92    0.10 
   5  -8  -1    1.09    0.12 
  -5   8   0    5.37    0.21 
   5   8   0    5.11    0.20 
   5   8   0    5.17    0.20 
  -5  -8   0    4.95    0.19 
   5  -8   0    5.04    0.20 
   5  -8   0    5.48    0.20 
   5   8   1    0.05    0.05 
   5   8   1    0.05    0.06 
  -5   8  -1    0.08    0.06 
   5  -8   1   -0.04    0.06 
   5  -8   1    0.02    0.06 
  -5  -8  -1    0.03    0.05 
   5   8   2    0.05    0.06 
  -5   8  -2   -0.02    0.06 
  -5  -8  -2    0.01    0.05 
  -5  -8  -2   -0.03    0.06 
   5  -8   2   -0.01    0.06 
   5  -8   2   -0.03    0.05 
  -5   8  -3    1.31    0.13 
   5   8   3    1.35    0.13 
  -5  -8  -3    1.15    0.10 
   5  -8   3    1.29    0.12 
  -5  -8  -3    1.15    0.13 
   5  -8   3    1.51    0.13 
   5   8   4    0.14    0.07 
  -5   8  -4    0.14    0.07 
  -5  -8  -4    0.15    0.08 
   5  -8   4    0.19    0.06 
   5  -8   4    0.13    0.07 
  -5   8  -5    1.50    0.14 
   5   8   5    1.78    0.14 
  -5  -8  -5    1.78    0.15 
   5  -8   5    1.48    0.14 
   5  -8   5    1.52    0.13 
  -5   8  -6    2.35    0.17 
   5   8   6    3.03    0.18 
   5  -8   6    2.81    0.17 
  -5  -8  -6    2.60    0.18 
   5  -8   6    2.70    0.16 
   5   8   7    2.25    0.17 
  -5   8  -7    2.32    0.17 
  -5  -8  -7    2.23    0.18 
   5  -8   7    2.47    0.16 
   5  -8   7    2.32    0.16 
  -5   8  -8   13.17    0.40 
   5   8   8   13.38    0.40 
   5  -8   8   14.23    0.38 
   5  -8   8   14.58    0.39 
  -5  -8  -8   13.47    0.40 
  -5   8  -9    1.02    0.13 
   5   8   9    0.76    0.12 
   5  -8   9    0.82    0.11 
  -5  -8  -9    0.84    0.13 
   5   8  10    0.42    0.11 
  -5   8 -10    0.11    0.09 
  -5  -8 -10    0.37    0.11 
   5   8  11    0.62    0.13 
  -5   8 -11    0.91    0.14 
  -5  -8 -11    0.71    0.14 
  -5   9  14   -0.05    0.10 
  -5  -9  14    0.08    0.11 
  -5   9  13   -0.26    0.09 
   5   9 -13   -0.09    0.12 
  -5  -9  13   -0.08    0.07 
   5   9 -12    4.10    0.28 
  -5   9  12    4.24    0.25 
  -5  -9  12    4.27    0.24 
   5   9 -11    1.21    0.17 
   5  -9 -11    0.81    0.13 
  -5  -9  11    0.75    0.13 
   5   9 -10    0.34    0.12 
   5  -9 -10    0.53    0.11 
  -5  -9  10    0.28    0.09 
  -5   9   9    0.11    0.07 
   5   9  -9   -0.07    0.09 
   5  -9  -9   -0.08    0.08 
  -5  -9   9   -0.05    0.07 
   5   9  -8    1.49    0.16 
  -5   9   8    1.20    0.13 
   5   9  -8    1.37    0.13 
  -5  -9   8    1.68    0.16 
   5  -9  -8    1.43    0.15 
   5   9  -7    0.00    0.08 
  -5   9   7   -0.02    0.06 
  -5   9   7    0.10    0.07 
   5   9  -7   -0.04    0.06 
  -5  -9   7    0.09    0.07 
   5  -9  -7    0.08    0.07 
   5   9  -6    9.66    0.31 
   5   9  -6    9.61    0.29 
  -5   9   6    9.83    0.30 
  -5   9   6    9.53    0.30 
  -5  -9   6    9.21    0.30 
   5  -9  -6    8.86    0.29 
  -5   9   5   -0.10    0.05 
   5   9  -5    0.02    0.05 
   5   9  -5    0.08    0.07 
  -5   9   5    0.11    0.07 
  -5  -9   5    0.00    0.06 
   5  -9  -5    0.01    0.07 
   5  -9  -5    0.14    0.07 
   5   9  -4    0.44    0.08 
  -5   9   4    0.48    0.09 
   5   9  -4    0.33    0.08 
   5  -9  -4    0.39    0.08 
  -5  -9   4    0.28    0.08 
   5  -9  -4    0.33    0.08 
   5   9  -3    1.23    0.12 
  -5   9   3    1.48    0.13 
   5   9  -3    1.16    0.12 
  -5  -9   3    1.58    0.13 
   5  -9  -3    1.62    0.13 
   5  -9  -3    1.39    0.14 
   5   9  -2    0.49    0.08 
  -5   9   2    0.33    0.08 
   5   9  -2    0.51    0.09 
  -5  -9   2    0.43    0.08 
   5  -9  -2    0.39    0.08 
   5  -9  -2    0.52    0.09 
  -5   9   1    0.03    0.06 
   5   9  -1    0.10    0.07 
   5   9  -1    0.08    0.06 
  -5  -9   1    0.04    0.07 
   5  -9  -1    0.15    0.07 
   5  -9  -1    0.12    0.07 
   5   9   0    1.35    0.12 
  -5   9   0    1.23    0.13 
   5   9   0    1.51    0.13 
   5  -9   0    1.43    0.14 
   5  -9   0    1.55    0.13 
  -5  -9   0    1.47    0.13 
   5   9   1    0.63    0.09 
  -5   9  -1    0.58    0.10 
   5   9   1    0.65    0.10 
   5  -9   1    0.72    0.10 
  -5  -9  -1    0.81    0.10 
   5  -9   1    0.63    0.09 
   5   9   2    0.68    0.09 
  -5   9  -2    0.73    0.11 
  -5  -9  -2    0.61    0.10 
  -5  -9  -2    0.61    0.09 
   5  -9   2    0.73    0.11 
   5   9   3    0.30    0.08 
  -5   9  -3    0.16    0.08 
  -5  -9  -3    0.42    0.08 
  -5  -9  -3    0.21    0.08 
   5  -9   3    0.28    0.08 
  -5   9  -4    0.32    0.09 
   5   9   4    0.13    0.07 
   5  -9   4    0.41    0.09 
  -5  -9  -4    0.31    0.09 
  -5   9  -5   -0.05    0.07 
   5   9   5    0.04    0.06 
   5  -9   5   -0.03    0.07 
  -5  -9  -5    0.05    0.08 
   5   9   6    0.69    0.11 
  -5   9  -6    0.33    0.10 
   5  -9   6    0.33    0.10 
  -5  -9  -6    0.45    0.10 
   5   9   7    1.53    0.16 
  -5   9  -7    1.42    0.16 
   5  -9   7    1.45    0.15 
  -5  -9  -7    1.35    0.15 
  -5   9  -8    0.92    0.13 
   5   9   8    0.82    0.12 
  -5  -9  -8    0.78    0.13 
   5  -9   8    0.45    0.10 
  -5   9  -9    0.30    0.10 
   5   9   9    0.38    0.11 
  -5  -9  -9    0.38    0.11 
   5   9  10    0.63    0.13 
  -5   9 -10    0.06    0.09 
  -5  -9 -10    0.50    0.12 
   5   9  11    0.17    0.11 
  -5  -9 -11    0.14    0.11 
   5  10 -13   -0.13    0.12 
   5  10 -12    0.70    0.16 
  -5 -10  12    0.99    0.15 
   5  10 -11    0.12    0.12 
  -5 -10  11    0.15    0.10 
   5  10 -10    0.46    0.12 
  -5 -10  10    0.50    0.11 
   5  10  -9    0.02    0.09 
  -5  10   9    0.07    0.08 
  -5 -10   9    0.19    0.09 
   5  10  -8   -0.03    0.09 
   5 -10  -8   -0.04    0.07 
  -5 -10   8    0.04    0.08 
  -5  10   7    0.04    0.07 
   5  10  -7    0.07    0.08 
   5  10  -7    0.08    0.07 
   5 -10  -7   -0.08    0.07 
  -5 -10   7    0.07    0.08 
   5  10  -6    0.59    0.11 
   5  10  -6    0.55    0.09 
  -5  10   6    0.53    0.09 
  -5 -10   6    0.43    0.10 
   5 -10  -6    0.71    0.11 
   5  10  -5    0.09    0.07 
   5  10  -5    0.03    0.08 
  -5  10   5    0.02    0.07 
  -5 -10   5    0.02    0.07 
   5 -10  -5    0.15    0.09 
   5  10  -4    0.61    0.10 
   5  10  -4    0.44    0.10 
  -5  10   4    0.57    0.10 
   5 -10  -4    0.60    0.10 
  -5 -10   4    0.52    0.10 
   5  10  -3    5.71    0.23 
  -5  10   3    5.38    0.23 
   5  10  -3    5.61    0.23 
  -5 -10   3    5.34    0.23 
   5 -10  -3    5.67    0.24 
   5  10  -2    3.03    0.18 
   5  10  -2    3.17    0.18 
  -5  10   2    2.98    0.18 
  -5 -10   2    2.93    0.18 
   5 -10  -2    3.10    0.18 
   5  10  -1    2.09    0.15 
   5  10  -1    1.93    0.15 
  -5  10   1    2.18    0.16 
  -5 -10   1    2.24    0.16 
   5 -10  -1    1.79    0.16 
  -5  10   0    0.80    0.11 
   5  10   0    0.87    0.11 
   5  10   0    0.91    0.11 
  -5 -10   0    0.81    0.10 
   5 -10   0    0.80    0.12 
  -5  10  -1    0.31    0.09 
   5  10   1    0.29    0.09 
   5  10   1    0.28    0.08 
  -5 -10  -1    0.18    0.08 
   5 -10   1    0.21    0.09 
  -5  10  -2    1.42    0.15 
   5  10   2    1.33    0.14 
   5 -10   2    1.35    0.14 
  -5 -10  -2    1.36    0.13 
  -5 -10  -2    1.61    0.16 
  -5  10  -3    3.90    0.21 
   5  10   3    3.64    0.20 
   5 -10   3    3.62    0.20 
  -5 -10  -3    3.79    0.18 
  -5 -10  -3    3.40    0.20 
  -5  10  -4    0.04    0.08 
   5  10   4    0.12    0.08 
  -5 -10  -4    0.00    0.08 
   5 -10   4   -0.19    0.06 
  -5  10  -5    0.18    0.09 
   5  10   5    0.31    0.09 
  -5 -10  -5    0.29    0.10 
   5 -10   5    0.32    0.10 
  -5  10  -6    0.13    0.09 
   5  10   6    0.41    0.10 
  -5 -10  -6    0.66    0.12 
   5 -10   6    0.38    0.10 
  -5  10  -7    0.19    0.10 
   5  10   7    0.07    0.08 
  -5 -10  -7   -0.01    0.09 
   5 -10   7    0.19    0.09 
   5  10   8    0.19    0.10 
  -5  10  -8    0.13    0.09 
   5 -10   8    0.12    0.09 
  -5 -10  -8    0.22    0.10 
   5  10   9    0.56    0.13 
  -5  10  -9    0.39    0.11 
  -5 -10  -9    0.48    0.12 
   5  10  10    0.01    0.09 
  -5  10 -10    0.08    0.10 
  -5 -10 -10   -0.13    0.09 
  -5 -10 -11    0.71    0.15 
   5  11 -12    1.72    0.21 
   5  11 -11    4.55    0.28 
  -5 -11  11    4.95    0.28 
   5  11 -10    0.23    0.12 
  -5 -11  10    0.14    0.10 
   5  11  -9   -0.03    0.10 
   5 -11  -9    0.27    0.10 
  -5 -11   9    0.07    0.09 
   5  11  -8    0.03    0.09 
  -5 -11   8   -0.04    0.09 
   5 -11  -8   -0.14    0.08 
   5  11  -7    0.03    0.08 
   5  11  -7    0.02    0.09 
  -5  11   7    0.04    0.08 
  -5 -11   7    0.07    0.08 
   5 -11  -7    0.06    0.08 
   5  11  -6    0.36    0.10 
   5  11  -6    0.53    0.11 
  -5  11   6    0.31    0.09 
   5 -11  -6    0.30    0.10 
  -5 -11   6    0.43    0.10 
   5  11  -5    0.06    0.08 
  -5  11   5    0.15    0.08 
   5  11  -5    0.03    0.08 
  -5 -11   5    0.12    0.09 
   5 -11  -5    0.20    0.09 
  -5  11   4    1.25    0.14 
   5  11  -4    1.04    0.13 
   5  11  -4    0.97    0.13 
   5 -11  -4    1.12    0.14 
  -5 -11   4    0.98    0.13 
   5  11  -3   -0.06    0.07 
   5  11  -3   -0.06    0.06 
  -5  11   3    0.04    0.08 
  -5 -11   3   -0.01    0.08 
   5 -11  -3    0.09    0.08 
  -5  11   2   -0.05    0.07 
   5  11  -2    0.04    0.07 
   5  11  -2   -0.06    0.06 
  -5 -11   2   -0.04    0.07 
   5 -11  -2   -0.06    0.07 
   5  11  -1    8.16    0.30 
   5  11  -1    8.10    0.28 
  -5  11   1    7.77    0.29 
  -5 -11   1    8.03    0.28 
   5 -11  -1    8.02    0.29 
  -5  11   0    1.40    0.15 
   5  11   0    1.60    0.15 
   5  11   0    1.32    0.14 
  -5 -11   0    1.73    0.15 
   5 -11   0    1.59    0.17 
   5  11   1    2.25    0.17 
   5  11   1    2.28    0.18 
  -5  11  -1    2.45    0.18 
  -5 -11  -1    2.28    0.16 
   5 -11   1    2.32    0.18 
   5  11   2    0.11    0.07 
  -5  11  -2    0.15    0.09 
  -5 -11  -2    0.06    0.08 
   5 -11   2    0.16    0.09 
  -5 -11  -2    0.16    0.09 
  -5  11  -3   -0.03    0.07 
   5  11   3    0.02    0.07 
   5 -11   3   -0.08    0.08 
  -5 -11  -3    0.04    0.08 
   5  11   4    0.16    0.08 
  -5  11  -4    0.09    0.08 
   5 -11   4    0.08    0.09 
  -5 -11  -4    0.18    0.09 
   5  11   5    0.19    0.09 
  -5  11  -5    0.35    0.10 
   5 -11   5   -0.02    0.08 
  -5 -11  -5    0.07    0.08 
  -5  11  -6    0.24    0.10 
   5  11   6    0.25    0.10 
   5 -11   6    0.25    0.10 
  -5 -11  -6    0.18    0.10 
   5  11   7    0.25    0.10 
  -5  11  -7    0.35    0.11 
  -5 -11  -7    0.16    0.10 
   5 -11   7    0.14    0.10 
  -5  11  -8    1.02    0.15 
   5  11   8    1.27    0.16 
   5 -11   8    1.33    0.16 
  -5 -11  -8    1.32    0.17 
  -5  11  -9    0.15    0.10 
   5  11   9    0.08    0.10 
  -5 -11  -9    0.02    0.10 
  -5 -12   9    0.53    0.13 
   5  12  -8    1.00    0.15 
  -5 -12   8    1.30    0.16 
   5 -12  -8    1.32    0.16 
   5  12  -7   -0.04    0.09 
   5  12  -7   -0.02    0.08 
  -5  12   7   -0.10    0.08 
  -5 -12   7   -0.04    0.09 
   5 -12  -7    0.04    0.10 
   5  12  -6   -0.04    0.09 
   5  12  -6    0.07    0.09 
  -5  12   6    0.03    0.08 
   5 -12  -6   -0.08    0.08 
  -5 -12   6   -0.07    0.08 
  -5  12   5   -0.04    0.08 
   5  12  -5    0.04    0.08 
   5  12  -5   -0.08    0.07 
  -5 -12   5   -0.06    0.08 
   5 -12  -5    0.02    0.09 
   5  12  -4    0.63    0.12 
   5  12  -4    0.47    0.10 
  -5  12   4    0.54    0.11 
  -5 -12   4    0.80    0.13 
   5 -12  -4    0.58    0.12 
   5  12  -3    0.14    0.08 
   5  12  -3    0.11    0.08 
  -5  12   3    0.00    0.08 
  -5 -12   3    0.12    0.09 
   5 -12  -3   -0.05    0.08 
   5  12  -2   -0.04    0.07 
   5  12  -2    0.04    0.09 
  -5  12   2    0.02    0.08 
  -5 -12   2    0.00    0.09 
   5 -12  -2   -0.10    0.08 
   5  12  -1    1.37    0.15 
  -5  12   1    1.62    0.17 
   5  12  -1    1.48    0.16 
  -5 -12   1    1.53    0.17 
   5 -12  -1    1.38    0.16 
   5  12   0    2.45    0.18 
  -5  12   0    2.84    0.20 
   5  12   0    2.75    0.19 
   5 -12   0    2.42    0.19 
  -5 -12   0    2.49    0.18 
  -5  12  -1    0.16    0.09 
   5  12   1    0.04    0.08 
   5  12   1    0.15    0.08 
  -5 -12  -1    0.24    0.09 
   5 -12   1    0.02    0.09 
   5  12   2    0.00    0.07 
  -5  12  -2   -0.09    0.08 
  -5 -12  -2    0.05    0.09 
  -5 -12  -2   -0.15    0.07 
   5 -12   2   -0.14    0.08 
  -5  12  -3   -0.08    0.08 
   5  12   3   -0.06    0.07 
  -5 -12  -3   -0.17    0.07 
   5 -12   3   -0.01    0.09 
   5  12   4    1.93    0.18 
  -5  12  -4    1.74    0.19 
   5 -12   4    1.64    0.18 
  -5 -12  -4    1.93    0.20 
   5  12   5   -0.06    0.08 
  -5  12  -5    0.06    0.09 
  -5 -12  -5    0.06    0.10 
   5 -12   5    0.04    0.09 
   5  12   6    0.06    0.09 
  -5  12  -6    0.01    0.10 
   5 -12   6    0.00    0.10 
  -5 -12  -6    0.25    0.11 
  -5  12  -7    0.54    0.13 
   5  12   7    0.49    0.12 
  -5 -12  -7    0.58    0.14 
   5 -12   7    0.56    0.13 
   5 -12   8    0.98    0.15 
   5 -13  -8    0.28    0.12 
  -5  13   7    2.29    0.20 
   5  13  -7    1.97    0.20 
   5 -13  -7    1.94    0.20 
  -5  13   6   -0.11    0.08 
   5  13  -6    0.18    0.10 
  -5 -13   6    0.17    0.10 
   5 -13  -6    0.04    0.10 
   5  13  -5    1.96    0.19 
  -5  13   5    2.17    0.20 
  -5 -13   5    2.07    0.21 
   5 -13  -5    2.41    0.21 
   5  13  -4    0.69    0.13 
  -5  13   4    0.37    0.12 
  -5 -13   4    0.46    0.12 
   5 -13  -4    0.38    0.12 
   5  13  -3    0.10    0.10 
  -5  13   3    0.22    0.10 
   5  13  -3    0.09    0.09 
   5 -13  -3    0.06    0.11 
  -5 -13   3    0.09    0.10 
   5  13  -2    0.62    0.13 
  -5  13   2    0.57    0.12 
   5  13  -2    0.47    0.11 
  -5 -13   2    0.82    0.14 
   5 -13  -2    0.50    0.13 
  -5  13   1    0.18    0.10 
   5  13  -1    0.19    0.10 
   5  13  -1    0.20    0.09 
   5 -13  -1    0.21    0.10 
  -5 -13   1    0.13    0.10 
  -5  13   0   -0.07    0.08 
   5  13   0    0.00    0.09 
   5  13   0    0.05    0.08 
  -5 -13   0   -0.14    0.08 
   5 -13   0    0.15    0.10 
  -5  13  -1    0.38    0.11 
   5  13   1    0.11    0.09 
   5  13   1    0.31    0.10 
   5 -13   1    0.27    0.11 
  -5 -13  -1    0.29    0.10 
  -5  13  -2    0.11    0.10 
   5  13   2    0.16    0.10 
  -5 -13  -2    0.25    0.11 
   5 -13   2    0.26    0.12 
   5  13   3   -0.02    0.09 
  -5  13  -3   -0.01    0.10 
   5 -13   3    0.03    0.10 
  -5 -13  -3    0.05    0.10 
   5  13   4    0.05    0.09 
  -5  13  -4    0.02    0.09 
   5 -13   4   -0.01    0.09 
  -5 -13  -4    0.12    0.11 
   5  13   5    0.37    0.11 
   5 -13   5    0.24    0.12 
   5  13   6   -0.06    0.09 
   5  14  -4   -0.05    0.10 
  -5  14   4    0.10    0.11 
  -5  14   3    0.05    0.11 
   5  14  -3    0.09    0.10 
  -5 -14   3    0.09    0.11 
  -5  14   2    1.19    0.17 
   5  14  -2    1.43    0.17 
  -5 -14   2    1.44    0.17 
   5  14  -1    0.26    0.12 
  -5  14   1   -0.02    0.10 
  -5 -14   1   -0.04    0.10 
  -5 -14   0    0.07    0.11 
  -5 -14  -1    0.00    0.10 
   6   0 -16    0.39    0.13 
  -6   0  16    0.33    0.11 
   6   0 -15    0.01    0.10 
  -6   0  15    0.10    0.08 
  -6   0  14    0.06    0.07 
   6   0 -14    0.02    0.10 
  -6   0  13   -0.02    0.06 
   6   0 -13   -0.01    0.09 
  -6   0  13    0.01    0.05 
   6   0 -12    0.13    0.09 
  -6   0  12   -0.01    0.05 
  -6   0  12   -0.02    0.06 
  -6   0  11   -0.04    0.05 
   6   0 -11    0.16    0.09 
  -6   0  11   -0.02    0.05 
  -6   0  10   15.77    0.37 
  -6   0  10   15.81    0.39 
   6   0 -10   15.64    0.40 
   6   0  -9    0.06    0.07 
  -6   0   9    0.06    0.05 
  -6   0   9    0.05    0.04 
  -6   0   8    4.47    0.16 
  -6   0   8    4.34    0.17 
   6   0  -8    4.43    0.18 
  -6   0   7    0.00    0.04 
  -6   0   7    0.04    0.04 
   6   0  -7   -0.01    0.05 
   6   0  -6   27.79    0.54 
  -6   0   6   28.48    0.53 
  -6   0   6   27.70    0.55 
  -6   0   5    0.06    0.03 
   6   0  -5    0.04    0.04 
  -6   0   5    0.04    0.03 
  -6   0   4    3.14    0.11 
   6   0  -4    3.18    0.12 
  -6   0   4    3.16    0.08 
   6   0  -4    3.11    0.12 
   6   0  -3   -0.01    0.03 
   6   0  -3    0.01    0.04 
  -6   0   3   -0.04    0.02 
  -6   0   3   -0.01    0.02 
  -6   0   2   19.03    0.36 
   6   0  -2   19.50    0.36 
  -6   0   2   18.94    0.35 
   6   0  -2   18.87    0.38 
   6   0  -1    0.07    0.03 
  -6   0   1    0.08    0.04 
  -6   0   1    0.06    0.03 
   6   0  -1    0.06    0.04 
  -6   0   0   34.63    0.59 
  -6   0   0   34.22    0.62 
   6   0   0   34.80    0.63 
   6   0   0   34.82    0.59 
  -6   0  -1    0.00    0.02 
  -6   0  -1    0.02    0.04 
   6   0   1    0.01    0.03 
   6   0   1   -0.01    0.03 
  -6   0  -2  104.34    1.77 
   6   0   2  105.27    1.74 
   6   0   2  105.57    1.80 
  -6   0  -2  108.33    1.68 
   6   0   3    0.05    0.04 
  -6   0  -3    0.03    0.04 
   6   0   3    0.00    0.03 
  -6   0  -3    0.00    0.02 
   6   0   4   13.68    0.29 
   6   0   4   12.98    0.31 
  -6   0  -4   13.22    0.31 
   6   0   5    0.04    0.04 
   6   0   5    0.07    0.04 
  -6   0  -5    0.03    0.05 
   6   0   6   14.79    0.34 
  -6   0  -6   14.53    0.35 
   6   0   6   14.41    0.36 
   6   0   7    0.00    0.05 
  -6   0  -7    0.04    0.06 
  -6   0  -7    0.04    0.06 
   6   0   8    6.52    0.24 
  -6   0  -8    6.48    0.23 
  -6   0  -8    6.16    0.23 
  -6   0  -9    0.04    0.06 
   6   0   9    0.05    0.06 
  -6   0  -9   -0.01    0.07 
   6   0  10    0.02    0.06 
  -6   0 -10   -0.06    0.07 
  -6   0 -10    0.12    0.08 
  -6   0 -11    0.00    0.07 
   6   0  11    0.03    0.07 
  -6   0 -11    0.00    0.08 
   6   0  12    2.33    0.18 
  -6   0 -12    2.12    0.20 
   6   0  13   -0.12    0.06 
  -6   0 -13    0.10    0.10 
  -6   0 -14    1.34    0.18 
   6   0  14    1.75    0.19 
  -6  -1  17    1.52    0.18 
  -6   1  16    1.17    0.15 
   6   1 -16    1.08    0.17 
   6  -1 -16    0.94    0.17 
  -6  -1  16    0.89    0.14 
  -6   1  15    0.38    0.10 
   6   1 -15    0.41    0.12 
   6  -1 -15    0.12    0.11 
  -6  -1  15    0.22    0.09 
  -6   1  14    0.01    0.07 
   6   1 -14   -0.06    0.09 
   6  -1 -14   -0.12    0.09 
  -6  -1  14    0.12    0.07 
  -6   1  13    0.03    0.05 
  -6   1  13    0.06    0.07 
   6   1 -13   -0.02    0.08 
  -6  -1  13    0.00    0.06 
  -6  -1  13    0.12    0.06 
   6  -1 -13    0.00    0.08 
  -6   1  12    1.61    0.14 
   6   1 -12    1.35    0.15 
  -6   1  12    1.35    0.11 
   6  -1 -12    1.52    0.16 
  -6  -1  12    1.59    0.14 
  -6  -1  12    1.43    0.12 
  -6   1  11   24.08    0.51 
   6   1 -11   24.43    0.55 
  -6   1  11   23.68    0.55 
  -6  -1  11   23.86    0.54 
   6  -1 -11   24.02    0.55 
  -6  -1  11   23.85    0.51 
  -6   1  10    0.02    0.04 
  -6   1  10    0.12    0.06 
   6   1 -10    0.17    0.08 
  -6  -1  10    0.00    0.05 
   6  -1 -10    0.12    0.07 
  -6  -1  10   -0.01    0.05 
  -6   1   9    0.04    0.05 
   6   1  -9    0.00    0.07 
  -6   1   9    0.00    0.04 
   6  -1  -9    0.03    0.06 
  -6  -1   9   -0.02    0.04 
  -6  -1   9    0.00    0.05 
   6   1  -8    0.37    0.08 
  -6   1   8    0.50    0.06 
  -6   1   8    0.57    0.07 
   6  -1  -8    0.38    0.08 
  -6  -1   8    0.32    0.06 
  -6  -1   8    0.52    0.07 
  -6   1   7    7.15    0.21 
   6   1  -7    7.28    0.22 
  -6   1   7    7.09    0.20 
  -6  -1   7    7.24    0.20 
  -6  -1   7    7.38    0.21 
   6  -1  -7    7.45    0.21 
   6   1  -6    4.19    0.15 
  -6   1   6    4.10    0.14 
  -6   1   6    4.13    0.15 
  -6  -1   6    4.10    0.14 
  -6  -1   6    4.04    0.14 
   6  -1  -6    3.89    0.14 
  -6   1   5    2.91    0.12 
   6   1  -5    2.81    0.13 
  -6   1   5    2.73    0.11 
  -6   1   5    3.10    0.07 
   6  -1  -5    2.84    0.11 
  -6  -1   5    2.94    0.11 
  -6  -1   5    3.03    0.07 
  -6  -1   5    2.92    0.11 
  -6   1   4   13.09    0.24 
   6   1  -4   13.13    0.28 
   6   1  -4   13.01    0.28 
  -6   1   4   12.54    0.27 
  -6  -1   4   13.40    0.24 
   6  -1  -4   13.34    0.27 
   6  -1  -4   12.23    0.29 
  -6  -1   4   13.01    0.28 
   6   1  -3    6.27    0.17 
  -6   1   3    6.11    0.14 
   6   1  -3    6.22    0.16 
  -6  -1   3    6.20    0.16 
  -6  -1   3    6.15    0.14 
   6  -1  -3    6.02    0.17 
   6  -1  -3    6.11    0.15 
   6   1  -2    9.18    0.21 
  -6   1   2    9.13    0.21 
   6   1  -2    9.54    0.21 
  -6   1   2    9.37    0.20 
  -6  -1   2    9.40    0.20 
   6  -1  -2    9.37    0.19 
   6  -1  -2    9.27    0.23 
  -6  -1   2    9.61    0.21 
  -6   1   1    4.34    0.12 
   6   1  -1    4.64    0.13 
   6   1  -1    4.77    0.14 
  -6   1   1    4.50    0.13 
   6  -1  -1    4.59    0.11 
  -6  -1   1    4.26    0.13 
  -6  -1   1    4.45    0.12 
   6  -1  -1    4.46    0.15 
   6   1   0    2.67    0.10 
   6   1   0    2.52    0.10 
  -6   1   0    2.71    0.09 
  -6   1   0    2.53    0.10 
   6  -1   0    2.76    0.08 
  -6  -1   0    2.63    0.08 
  -6  -1   0    2.52    0.10 
   6  -1   0    2.46    0.11 
   6   1   1   11.98    0.25 
  -6   1  -1   11.97    0.27 
   6   1   1   11.87    0.26 
  -6   1  -1   12.14    0.23 
   6  -1   1   12.16    0.23 
   6  -1   1   11.94    0.27 
  -6  -1  -1   12.27    0.22 
  -6  -1  -1   11.99    0.26 
  -6   1  -2    0.79    0.05 
  -6   1  -2    0.79    0.08 
   6   1   2    0.66    0.06 
   6   1   2    0.71    0.07 
   6  -1   2    0.65    0.05 
  -6  -1  -2    0.68    0.04 
   6  -1   2    0.76    0.07 
  -6  -1  -2    0.65    0.07 
  -6   1  -3   17.31    0.37 
   6   1   3   16.86    0.36 
   6   1   3   17.02    0.35 
   6  -1   3   17.58    0.31 
  -6  -1  -3   17.04    0.36 
   6  -1   3   16.89    0.33 
   6  -1   3   16.75    0.37 
   6   1   4    6.40    0.19 
   6   1   4    6.72    0.19 
  -6   1  -4    6.67    0.20 
  -6  -1  -4    6.60    0.20 
   6  -1   4    6.61    0.18 
   6  -1   4    6.41    0.20 
   6  -1   4    6.70    0.14 
  -6   1  -5   10.95    0.26 
   6   1   5   10.32    0.26 
  -6   1  -5   10.79    0.28 
   6   1   5   10.31    0.27 
   6  -1   5   10.78    0.20 
  -6  -1  -5   10.83    0.28 
  -6   1  -6    4.81    0.19 
   6   1   6    4.42    0.18 
  -6   1  -6    4.45    0.17 
   6   1   6    5.00    0.18 
   6  -1   6    4.81    0.18 
  -6  -1  -6    4.65    0.19 
   6   1   7    0.18    0.06 
  -6   1  -7    0.14    0.07 
   6   1   7    0.15    0.06 
  -6   1  -7    0.24    0.07 
  -6  -1  -7    0.28    0.07 
   6  -1   7    0.21    0.07 
   6   1   8    0.07    0.06 
  -6   1  -8    0.10    0.07 
  -6   1  -8   -0.02    0.07 
  -6  -1  -8    0.03    0.07 
  -6  -1  -8    0.10    0.07 
   6  -1   8    0.09    0.06 
  -6   1  -9    0.97    0.11 
   6   1   9    0.73    0.10 
  -6   1  -9    1.00    0.11 
  -6  -1  -9    0.82    0.11 
  -6  -1  -9    1.09    0.12 
   6  -1   9    0.82    0.11 
   6   1  10    1.45    0.15 
  -6   1 -10    1.52    0.15 
  -6   1 -10    1.70    0.16 
   6  -1  10    1.56    0.15 
  -6  -1 -10    1.42    0.16 
  -6  -1 -10    1.28    0.14 
  -6   1 -11    3.08    0.20 
   6   1  11    2.48    0.18 
  -6   1 -11    2.83    0.18 
   6  -1  11    2.63    0.18 
  -6  -1 -11    2.45    0.19 
  -6  -1 -11    2.22    0.17 
  -6   1 -12    0.05    0.09 
   6   1  12    0.10    0.08 
   6  -1  12    0.15    0.08 
  -6  -1 -12    0.19    0.10 
  -6   1 -13    0.41    0.12 
   6   1  13    0.31    0.10 
  -6  -1 -13    0.43    0.12 
   6  -1  13    0.36    0.10 
   6   1  14    0.10    0.10 
  -6   1 -14    0.12    0.12 
   6  -1  14    0.06    0.09 
  -6  -1 -14    0.20    0.11 
  -6  -2  17    0.56    0.12 
  -6   2  16    0.40    0.12 
   6   2 -16    0.37    0.14 
   6  -2 -16    0.65    0.15 
  -6  -2  16    0.37    0.10 
   6   2 -15    0.84    0.15 
  -6   2  15    1.07    0.14 
   6  -2 -15    0.68    0.14 
  -6  -2  15    0.95    0.13 
   6   2 -14    1.12    0.16 
  -6   2  14    1.40    0.15 
  -6  -2  14    1.42    0.15 
  -6  -2  14    1.24    0.13 
   6  -2 -14    1.40    0.16 
   6   2 -13    0.00    0.09 
  -6   2  13    0.03    0.06 
   6  -2 -13    0.12    0.09 
  -6  -2  13    0.05    0.06 
  -6  -2  13    0.05    0.06 
  -6   2  12   -0.02    0.05 
  -6   2  12    0.09    0.06 
   6   2 -12   -0.04    0.08 
  -6  -2  12   -0.01    0.05 
  -6  -2  12   -0.03    0.05 
   6  -2 -12   -0.07    0.07 
  -6   2  11    4.78    0.18 
  -6   2  11    4.49    0.20 
   6  -2 -11    4.42    0.21 
  -6  -2  11    4.62    0.18 
  -6  -2  11    4.74    0.20 
  -6   2  10    7.57    0.25 
  -6   2  10    7.52    0.22 
   6   2 -10    6.74    0.26 
  -6  -2  10    7.18    0.24 
   6  -2 -10    7.36    0.25 
  -6  -2  10    6.83    0.22 
  -6   2   9    1.76    0.13 
  -6   2   9    2.02    0.11 
   6   2  -9    1.83    0.15 
  -6  -2   9    1.97    0.12 
   6  -2  -9    1.96    0.14 
  -6  -2   9    2.00    0.12 
  -6   2   8    0.67    0.08 
   6   2  -8    0.69    0.10 
  -6   2   8    0.52    0.06 
  -6  -2   8    0.59    0.07 
   6  -2  -8    0.58    0.08 
  -6  -2   8    0.63    0.08 
   6   2  -7    2.21    0.14 
  -6   2   7    2.48    0.07 
  -6   2   7    2.42    0.13 
  -6   2   7    2.43    0.11 
  -6  -2   7    2.38    0.11 
  -6  -2   7    2.44    0.11 
   6  -2  -7    2.37    0.12 
  -6   2   6   43.92    0.85 
   6   2  -6   45.59    0.84 
  -6   2   6   44.89    0.81 
  -6   2   6   47.73    0.76 
  -6  -2   6   46.38    0.83 
  -6  -2   6   45.06    0.81 
  -6  -2   6   46.41    0.76 
   6  -2  -6   45.63    0.81 
   6   2  -5   12.44    0.29 
  -6   2   5   12.15    0.23 
  -6   2   5   11.78    0.27 
  -6  -2   5   12.73    0.23 
  -6  -2   5   12.46    0.27 
   6  -2  -5   11.62    0.26 
  -6  -2   5   11.82    0.27 
   6  -2  -5   11.52    0.29 
  -6   2   4    0.80    0.07 
   6   2  -4    0.85    0.07 
  -6   2   4    0.93    0.05 
   6   2  -4    0.84    0.08 
   6  -2  -4    0.81    0.08 
   6  -2  -4    0.76    0.07 
  -6  -2   4    0.87    0.05 
  -6  -2   4    0.82    0.07 
   6   2  -3   22.99    0.45 
   6   2  -3   24.00    0.44 
  -6   2   3   22.38    0.44 
  -6   2   3   23.53    0.43 
  -6  -2   3   23.82    0.42 
  -6  -2   3   23.30    0.44 
   6  -2  -3   23.86    0.41 
   6   2  -2    0.08    0.03 
  -6   2   2    0.04    0.03 
  -6   2   2    0.09    0.03 
   6   2  -2    0.01    0.04 
  -6  -2   2    0.07    0.03 
   6  -2  -2    0.00    0.02 
  -6  -2   2    0.04    0.03 
   6  -2  -2   -0.01    0.04 
  -6   2   1    0.24    0.04 
   6   2  -1    0.26    0.04 
  -6   2   1    0.29    0.04 
   6   2  -1    0.37    0.04 
   6  -2  -1    0.35    0.03 
  -6  -2   1    0.33    0.04 
  -6  -2   1    0.36    0.05 
   6  -2  -1    0.28    0.05 
   6   2   0   19.56    0.37 
  -6   2   0   19.06    0.38 
  -6   2   0   19.12    0.36 
   6   2   0   19.12    0.38 
  -6  -2   0   19.50    0.38 
  -6  -2   0   19.92    0.35 
   6  -2   0   19.09    0.40 
   6  -2   0   19.63    0.33 
   6   2   1   15.91    0.33 
  -6   2  -1   16.28    0.31 
  -6   2  -1   16.23    0.34 
   6   2   1   16.13    0.33 
   6  -2   1   16.40    0.35 
  -6  -2  -1   15.89    0.34 
   6  -2   1   16.55    0.29 
  -6  -2  -1   16.84    0.30 
   6   2   2    2.65    0.11 
  -6   2  -2    2.75    0.09 
   6   2   2    2.97    0.11 
  -6   2  -2    2.68    0.12 
  -6  -2  -2    2.87    0.07 
   6  -2   2    2.73    0.08 
   6  -2   2    2.62    0.12 
  -6   2  -3    3.88    0.12 
   6   2   3    3.73    0.13 
  -6   2  -3    3.52    0.14 
   6   2   3    3.69    0.13 
   6  -2   3    3.78    0.11 
   6  -2   3    3.69    0.14 
  -6  -2  -3    3.86    0.14 
   6   2   4    0.69    0.07 
  -6   2  -4    0.75    0.07 
  -6   2  -4    0.70    0.08 
   6   2   4    0.68    0.07 
  -6  -2  -4    0.63    0.08 
   6  -2   4    0.77    0.06 
   6  -2   4    0.72    0.08 
   6   2   5    0.06    0.04 
  -6   2  -5    0.14    0.06 
   6   2   5    0.08    0.04 
  -6   2  -5    0.10    0.05 
   6  -2   5    0.13    0.04 
   6  -2   5    0.11    0.05 
  -6  -2  -5    0.15    0.06 
  -6   2  -6    0.06    0.06 
  -6   2  -6    0.02    0.05 
   6   2   6    0.01    0.05 
   6   2   6    0.03    0.05 
  -6  -2  -6    0.03    0.06 
   6  -2   6   -0.02    0.04 
   6   2   7    1.90    0.13 
  -6   2  -7    1.47    0.12 
   6   2   7    1.60    0.12 
  -6   2  -7    1.59    0.13 
   6  -2   7    1.67    0.12 
  -6  -2  -7    1.59    0.14 
  -6   2  -8    1.16    0.11 
  -6   2  -8    1.12    0.12 
   6   2   8    1.30    0.12 
   6   2   8    1.08    0.12 
  -6  -2  -8    1.11    0.12 
   6  -2   8    1.24    0.12 
  -6   2  -9    1.12    0.12 
   6   2   9    0.87    0.11 
  -6   2  -9    1.07    0.12 
  -6  -2  -9    1.09    0.12 
   6  -2   9    0.75    0.10 
  -6  -2  -9    0.94    0.12 
  -6   2 -10   -0.01    0.07 
  -6   2 -10   -0.03    0.06 
   6   2  10    0.08    0.07 
  -6  -2 -10    0.06    0.07 
   6  -2  10    0.02    0.06 
  -6  -2 -10    0.18    0.08 
  -6   2 -11    0.05    0.07 
   6   2  11    0.01    0.06 
  -6   2 -11   -0.05    0.08 
  -6  -2 -11    0.12    0.09 
   6  -2  11   -0.10    0.06 
  -6  -2 -11   -0.03    0.07 
  -6   2 -12    0.20    0.10 
   6   2  12    0.12    0.08 
  -6  -2 -12    0.01    0.09 
   6  -2  12    0.19    0.08 
   6   2  13    0.25    0.10 
  -6   2 -13    0.29    0.11 
  -6  -2 -13    0.25    0.11 
   6  -2  13    0.17    0.09 
   6   2  14    0.79    0.15 
  -6   2 -14    0.58    0.14 
  -6  -2 -14    0.91    0.16 
   6  -2  14    0.40    0.12 
  -6   2 -15    0.11    0.13 
  -6  -3  17    1.22    0.16 
   6   3 -16    0.11    0.13 
  -6   3  16    0.06    0.08 
  -6  -3  16    0.18    0.09 
   6  -3 -16    0.02    0.11 
   6   3 -15    0.35    0.13 
  -6   3  15    0.41    0.10 
  -6  -3  15    0.57    0.11 
   6  -3 -15    0.46    0.13 
  -6   3  14    0.03    0.07 
   6   3 -14    0.24    0.12 
  -6  -3  14   -0.01    0.06 
  -6  -3  14    0.07    0.07 
   6  -3 -14   -0.04    0.09 
  -6   3  13   -0.06    0.06 
   6   3 -13    0.03    0.09 
   6  -3 -13   -0.02    0.08 
  -6  -3  13   -0.04    0.05 
  -6  -3  13    0.04    0.06 
  -6   3  12    2.30    0.16 
   6   3 -12    2.77    0.21 
  -6   3  12    2.64    0.15 
   6  -3 -12    2.57    0.18 
  -6  -3  12    2.81    0.16 
  -6  -3  12    2.55    0.16 
  -6   3  11    5.35    0.20 
   6   3 -11    4.99    0.24 
  -6   3  11    5.10    0.22 
  -6  -3  11    5.18    0.21 
  -6  -3  11    5.53    0.21 
   6  -3 -11    5.18    0.23 
   6   3 -10    0.10    0.09 
  -6   3  10    0.15    0.06 
  -6   3  10    0.13    0.07 
  -6  -3  10    0.13    0.06 
  -6  -3  10    0.13    0.06 
   6  -3 -10    0.11    0.08 
   6   3  -9    1.74    0.15 
  -6   3   9    1.83    0.14 
  -6   3   9    1.84    0.11 
  -6  -3   9    1.97    0.12 
   6  -3  -9    1.84    0.14 
  -6  -3   9    2.03    0.12 
   6   3  -8    2.71    0.16 
  -6   3   8    2.53    0.12 
  -6   3   8    2.49    0.14 
   6  -3  -8    2.57    0.14 
  -6  -3   8    2.65    0.13 
  -6  -3   8    2.48    0.12 
   6   3  -7    0.41    0.04 
  -6   3   7    0.24    0.06 
  -6   3   7    0.22    0.05 
   6   3  -7    0.26    0.07 
  -6   3   7    0.29    0.04 
  -6  -3   7    0.35    0.06 
   6  -3  -7    0.23    0.06 
  -6  -3   7    0.32    0.05 
   6   3  -6    0.50    0.08 
  -6   3   6    0.49    0.05 
  -6   3   6    0.52    0.06 
  -6   3   6    0.44    0.07 
   6   3  -6    0.39    0.04 
  -6  -3   6    0.46    0.06 
  -6  -3   6    0.44    0.05 
   6  -3  -6    0.44    0.06 
  -6   3   5    4.10    0.12 
  -6   3   5    3.90    0.14 
   6  -3  -5    4.24    0.13 
   6  -3  -5    4.12    0.15 
  -6  -3   5    3.95    0.11 
  -6  -3   5    3.71    0.14 
  -6  -3   5    4.00    0.12 
   6   3  -4   30.84    0.55 
  -6   3   4   29.55    0.56 
   6   3  -4   30.29    0.58 
  -6   3   4   29.54    0.54 
   6  -3  -4   30.34    0.53 
   6  -3  -4   29.94    0.59 
  -6  -3   4   30.35    0.54 
  -6  -3   4   30.55    0.56 
   6   3  -3   45.73    0.77 
  -6   3   3   44.02    0.77 
   6   3  -3   43.75    0.79 
  -6   3   3   42.57    0.77 
   6  -3  -3   43.52    0.81 
   6  -3  -3   44.63    0.73 
  -6  -3   3   44.01    0.76 
  -6  -3   3   44.03    0.77 
  -6   3   2    1.14    0.07 
  -6   3   2    1.04    0.07 
   6   3  -2    1.29    0.07 
   6   3  -2    1.20    0.08 
   6  -3  -2    0.98    0.09 
  -6  -3   2    1.14    0.07 
   6  -3  -2    1.10    0.04 
  -6  -3   2    1.17    0.07 
   6   3  -1    5.17    0.15 
  -6   3   1    5.02    0.15 
  -6   3   1    5.09    0.15 
   6   3  -1    5.16    0.13 
  -6  -3   1    5.07    0.14 
  -6  -3   1    5.38    0.15 
   6  -3  -1    5.01    0.16 
  -6   3   0    2.16    0.10 
   6   3   0    2.04    0.08 
   6   3   0    2.04    0.10 
  -6   3   0    2.31    0.09 
  -6  -3   0    2.13    0.10 
   6  -3   0    2.22    0.11 
  -6  -3   0    2.11    0.08 
   6   3   1    3.03    0.12 
  -6   3  -1    3.04    0.12 
  -6   3  -1    3.00    0.11 
  -6   3  -1    3.12    0.07 
   6   3   1    2.83    0.10 
  -6  -3  -1    3.18    0.09 
  -6  -3  -1    2.90    0.12 
   6  -3   1    3.11    0.13 
  -6   3  -2    4.58    0.13 
   6   3   2    4.39    0.15 
  -6   3  -2    4.45    0.11 
  -6   3  -2    4.21    0.15 
   6   3   2    4.40    0.14 
   6  -3   2    4.35    0.16 
  -6  -3  -2    4.40    0.15 
  -6  -3  -2    4.51    0.11 
   6   3   3    0.12    0.04 
   6   3   3    0.19    0.05 
  -6   3  -3    0.05    0.05 
  -6   3  -3    0.08    0.03 
  -6  -3  -3    0.14    0.02 
   6  -3   3    0.11    0.05 
  -6  -3  -3    0.09    0.05 
   6  -3   3    0.13    0.04 
   6   3   4    3.06    0.13 
  -6   3  -4    3.37    0.15 
   6   3   4    3.46    0.14 
  -6   3  -4    3.58    0.12 
  -6  -3  -4    3.40    0.15 
   6  -3   4    3.23    0.14 
   6  -3   4    3.46    0.12 
  -6   3  -5    2.67    0.12 
   6   3   5    2.58    0.13 
  -6   3  -5    2.71    0.14 
   6   3   5    2.48    0.13 
   6  -3   5    2.61    0.14 
   6  -3   5    2.74    0.11 
  -6  -3  -5    2.75    0.14 
   6   3   6    0.58    0.08 
  -6   3  -6    0.64    0.09 
  -6   3  -6    0.66    0.08 
   6   3   6    0.60    0.08 
   6  -3   6    0.52    0.08 
  -6  -3  -6    0.66    0.09 
   6  -3   6    0.65    0.07 
  -6   3  -7    0.38    0.08 
  -6   3  -7    0.44    0.08 
   6   3   7    0.40    0.08 
   6   3   7    0.26    0.07 
  -6  -3  -7    0.29    0.08 
   6  -3   7    0.26    0.07 
  -6   3  -8   10.07    0.30 
   6   3   8    9.83    0.30 
   6   3   8    9.73    0.30 
  -6   3  -8    9.72    0.28 
  -6  -3  -8    9.69    0.30 
   6  -3   8    9.82    0.30 
  -6   3  -9    3.55    0.19 
   6   3   9    3.66    0.18 
  -6   3  -9    3.74    0.19 
   6   3   9    3.82    0.19 
  -6  -3  -9    3.66    0.19 
   6  -3   9    3.65    0.19 
  -6   3 -10    0.25    0.09 
   6   3  10    0.18    0.08 
  -6   3 -10    0.10    0.08 
  -6  -3 -10    0.09    0.08 
  -6  -3 -10    0.06    0.08 
   6  -3  10    0.26    0.08 
   6   3  11    0.35    0.10 
  -6   3 -11    0.51    0.11 
  -6   3 -11    0.49    0.10 
   6  -3  11    0.50    0.10 
  -6  -3 -11    0.55    0.11 
  -6  -3 -11    0.48    0.11 
   6   3  12    0.01    0.08 
  -6   3 -12    0.06    0.09 
  -6  -3 -12    0.10    0.09 
   6  -3  12   -0.05    0.07 
  -6   3 -13    1.13    0.15 
   6   3  13    1.02    0.15 
  -6  -3 -13    0.88    0.15 
   6  -3  13    1.09    0.15 
   6   3  14    0.02    0.09 
  -6  -3 -14   -0.01    0.11 
   6  -3  14    0.16    0.10 
   6   4 -16    0.12    0.14 
  -6   4  16    0.20    0.10 
   6  -4 -16   -0.07    0.10 
  -6  -4  16   -0.02    0.08 
   6   4 -15    1.66    0.20 
  -6   4  15    1.72    0.18 
  -6  -4  15    1.52    0.16 
   6  -4 -15    1.46    0.17 
   6   4 -14    0.29    0.13 
  -6   4  14    0.44    0.11 
  -6  -4  14    0.61    0.10 
   6  -4 -14    0.53    0.12 
  -6  -4  14    0.64    0.10 
   6   4 -13    3.77    0.25 
  -6   4  13    4.17    0.22 
   6  -4 -13    4.94    0.24 
  -6  -4  13    4.34    0.21 
  -6  -4  13    4.50    0.21 
  -6   4  12    4.91    0.23 
   6   4 -12    4.29    0.25 
  -6   4  12    4.68    0.20 
  -6  -4  12    4.72    0.21 
   6  -4 -12    4.59    0.22 
  -6  -4  12    4.72    0.20 
   6   4 -11    9.42    0.32 
  -6   4  11    9.73    0.28 
  -6   4  11    9.17    0.31 
  -6  -4  11    9.70    0.29 
   6  -4 -11    9.39    0.30 
  -6  -4  11    9.25    0.28 
  -6   4  10    0.16    0.06 
   6   4 -10   -0.03    0.08 
  -6   4  10    0.07    0.07 
   6  -4 -10    0.10    0.07 
  -6  -4  10    0.15    0.06 
  -6  -4  10    0.06    0.05 
  -6   4   9    0.08    0.06 
   6   4  -9    0.03    0.08 
  -6   4   9    0.00    0.05 
  -6  -4   9    0.12    0.05 
   6  -4  -9    0.04    0.06 
  -6  -4   9   -0.01    0.05 
   6   4  -8    0.60    0.10 
  -6   4   8    0.66    0.08 
  -6   4   8    0.74    0.09 
  -6  -4   8    0.75    0.08 
  -6  -4   8    0.94    0.10 
   6  -4  -8    0.61    0.08 
  -6   4   7    0.09    0.05 
  -6   4   7    0.15    0.04 
   6   4  -7    0.03    0.07 
   6   4  -7    0.14    0.04 
  -6   4   7    0.12    0.05 
   6  -4  -7    0.16    0.06 
  -6  -4   7    0.08    0.04 
  -6  -4   7    0.28    0.06 
   6   4  -6    0.33    0.07 
  -6   4   6    0.60    0.07 
  -6   4   6    0.52    0.06 
   6   4  -6    0.51    0.05 
  -6  -4   6    0.66    0.08 
  -6  -4   6    0.58    0.06 
   6  -4  -6    0.58    0.08 
   6  -4  -6    0.38    0.06 
  -6   4   5   10.80    0.26 
   6   4  -5   10.85    0.28 
  -6   4   5   10.65    0.24 
   6   4  -5   10.58    0.23 
  -6  -4   5   10.73    0.27 
  -6  -4   5   10.85    0.23 
   6  -4  -5   10.75    0.24 
   6  -4  -5   10.69    0.28 
   6   4  -4    1.05    0.10 
   6   4  -4    1.06    0.06 
  -6   4   4    1.10    0.07 
  -6   4   4    1.00    0.08 
   6   4  -4    0.99    0.07 
   6  -4  -4    1.01    0.06 
  -6  -4   4    0.97    0.08 
   6  -4  -4    0.95    0.09 
  -6   4   3    4.22    0.14 
  -6   4   3    4.42    0.14 
   6   4  -3    4.51    0.11 
   6   4  -3    4.15    0.15 
   6  -4  -3    4.27    0.16 
   6  -4  -3    4.32    0.11 
  -6  -4   3    4.38    0.14 
  -6  -4   3    4.41    0.15 
   6   4  -2    7.02    0.20 
   6   4  -2    7.40    0.15 
  -6   4   2    7.05    0.19 
  -6   4   2    7.04    0.19 
   6  -4  -2    6.64    0.20 
  -6  -4   2    6.89    0.19 
  -6  -4   2    7.40    0.19 
  -6   4   1    0.03    0.03 
   6   4  -1   -0.02    0.04 
  -6   4   1    0.04    0.04 
   6   4  -1    0.00    0.02 
   6  -4  -1    0.04    0.05 
  -6  -4   1    0.02    0.04 
  -6  -4   1    0.00    0.03 
  -6   4   0    0.13    0.04 
  -6   4   0    0.12    0.05 
   6   4   0    0.21    0.05 
   6   4   0    0.17    0.03 
  -6  -4   0    0.12    0.04 
  -6  -4   0    0.22    0.05 
   6  -4   0    0.24    0.06 
  -6   4  -1    1.95    0.09 
   6   4   1    1.97    0.11 
  -6   4  -1    1.93    0.11 
   6   4   1    2.13    0.08 
   6  -4   1    1.90    0.11 
  -6  -4  -1    1.95    0.08 
  -6  -4  -1    1.94    0.11 
  -6   4  -2    0.11    0.03 
   6   4   2    0.22    0.04 
  -6   4  -2    0.07    0.05 
   6   4   2    0.23    0.05 
  -6  -4  -2    0.22    0.04 
  -6  -4  -2    0.12    0.05 
   6  -4   2    0.22    0.05 
   6  -4   2    0.09    0.04 
   6   4   3    6.29    0.20 
  -6   4  -3    6.20    0.15 
  -6   4  -3    6.37    0.20 
   6   4   3    6.71    0.18 
   6  -4   3    5.97    0.20 
  -6  -4  -3    6.47    0.15 
   6  -4   3    6.20    0.18 
  -6  -4  -3    6.56    0.20 
  -6   4  -4    1.33    0.09 
   6   4   4    1.53    0.10 
  -6   4  -4    1.46    0.11 
   6   4   4    1.47    0.09 
   6  -4   4    1.36    0.11 
   6  -4   4    1.31    0.09 
  -6  -4  -4    1.34    0.12 
  -6   4  -5    4.41    0.18 
  -6   4  -5    4.68    0.15 
   6   4   5    4.62    0.17 
   6   4   5    4.13    0.17 
   6  -4   5    4.48    0.15 
  -6  -4  -5    4.35    0.18 
   6  -4   5    4.50    0.18 
  -6   4  -6    2.53    0.13 
  -6   4  -6    2.36    0.15 
   6   4   6    2.37    0.13 
   6   4   6    2.22    0.14 
   6  -4   6    2.18    0.14 
  -6  -4  -6    2.32    0.14 
   6  -4   6    2.33    0.11 
   6   4   7    0.79    0.10 
   6   4   7    0.77    0.09 
  -6   4  -7    0.67    0.09 
  -6   4  -7    0.71    0.10 
  -6  -4  -7    0.65    0.10 
   6  -4   7    0.75    0.10 
   6   4   8    5.21    0.21 
  -6   4  -8    5.39    0.22 
  -6   4  -8    5.26    0.20 
   6   4   8    5.23    0.22 
   6  -4   8    5.31    0.22 
  -6  -4  -8    5.33    0.22 
   6   4   9    0.89    0.12 
  -6   4  -9    0.64    0.10 
  -6   4  -9    0.94    0.11 
   6   4   9    0.81    0.11 
  -6  -4  -9    0.64    0.10 
   6  -4   9    0.85    0.11 
  -6   4 -10    0.74    0.11 
  -6   4 -10    0.98    0.12 
   6   4  10    0.77    0.11 
   6   4  10    0.72    0.12 
  -6  -4 -10    0.80    0.12 
   6  -4  10    0.56    0.10 
   6   4  11    0.75    0.12 
  -6   4 -11    0.60    0.11 
  -6  -4 -11    0.81    0.12 
  -6  -4 -11    0.69    0.12 
   6  -4  11    0.55    0.11 
   6   4  12    0.18    0.09 
  -6  -4 -12    0.09    0.10 
   6  -4  12    0.12    0.08 
   6   4  13    0.68    0.13 
  -6  -4 -13    0.23    0.11 
   6  -4  13    0.43    0.11 
   6   4  14    0.90    0.16 
   6  -5 -16    0.36    0.12 
   6   5 -15    1.12    0.18 
  -6   5  15    0.84    0.14 
   6  -5 -15    0.95    0.15 
  -6   5  14    0.41    0.11 
   6   5 -14    0.21    0.13 
   6  -5 -14    0.49    0.12 
  -6  -5  14    0.28    0.09 
  -6   5  13    0.88    0.13 
   6   5 -13    1.00    0.16 
   6  -5 -13    0.94    0.13 
  -6  -5  13    0.73    0.11 
  -6   5  12    1.71    0.16 
  -6   5  12    1.59    0.14 
   6   5 -12    1.65    0.17 
  -6  -5  12    1.45    0.13 
   6  -5 -12    1.43    0.16 
  -6   5  11    0.80    0.11 
   6   5 -11    0.82    0.13 
  -6   5  11    0.91    0.10 
  -6  -5  11    0.93    0.10 
  -6  -5  11    0.80    0.11 
   6  -5 -11    0.67    0.11 
   6   5 -10    0.04    0.09 
  -6   5  10    0.22    0.07 
  -6   5  10    0.12    0.07 
   6  -5 -10    0.08    0.07 
  -6  -5  10    0.15    0.07 
  -6  -5  10    0.09    0.05 
  -6   5   9    0.24    0.08 
  -6   5   9    0.21    0.06 
   6   5  -9    0.09    0.09 
  -6  -5   9    0.22    0.07 
   6  -5  -9    0.29    0.08 
  -6  -5   9    0.33    0.06 
  -6   5   8   -0.05    0.05 
   6   5  -8   -0.01    0.07 
  -6   5   8    0.01    0.05 
   6  -5  -8   -0.05    0.05 
  -6  -5   8    0.09    0.06 
  -6  -5   8   -0.05    0.04 
  -6   5   7    1.78    0.11 
   6   5  -7    1.62    0.09 
  -6   5   7    1.92    0.10 
  -6   5   7    1.67    0.12 
  -6  -5   7    1.69    0.12 
   6  -5  -7    1.55    0.14 
  -6  -5   7    1.71    0.09 
   6  -5  -7    1.78    0.12 
   6   5  -6    4.34    0.20 
  -6   5   6    4.70    0.17 
  -6   5   6    4.81    0.15 
   6   5  -6    4.57    0.14 
  -6  -5   6    4.81    0.14 
  -6  -5   6    4.36    0.17 
   6  -5  -6    4.39    0.19 
   6  -5  -6    4.85    0.16 
  -6   5   5    2.36    0.12 
   6   5  -5    2.36    0.14 
   6   5  -5    2.27    0.09 
  -6   5   5    2.31    0.11 
   6   5  -5    2.37    0.10 
  -6  -5   5    2.31    0.12 
   6  -5  -5    2.48    0.14 
   6  -5  -5    2.11    0.10 
  -6   5   4   -0.02    0.04 
   6   5  -4   -0.07    0.05 
   6   5  -4    0.02    0.03 
  -6   5   4    0.00    0.04 
   6   5  -4    0.00    0.03 
   6  -5  -4   -0.05    0.05 
   6  -5  -4    0.06    0.03 
  -6  -5   4    0.00    0.04 
   6   5  -3    0.59    0.08 
  -6   5   3    0.58    0.07 
   6   5  -3    0.66    0.07 
  -6   5   3    0.71    0.08 
   6  -5  -3    0.81    0.09 
  -6  -5   3    0.70    0.08 
   6  -5  -3    0.68    0.05 
   6   5  -2    0.43    0.07 
  -6   5   2    0.36    0.06 
  -6   5   2    0.47    0.06 
   6   5  -2    0.48    0.06 
   6  -5  -2    0.31    0.06 
  -6  -5   2    0.55    0.07 
  -6  -5   2    0.43    0.06 
  -6   5   1    3.00    0.13 
  -6   5   1    3.10    0.13 
   6   5  -1    3.18    0.13 
   6  -5  -1    3.23    0.14 
  -6  -5   1    2.97    0.12 
  -6  -5   1    3.38    0.14 
   6   5   0    3.20    0.09 
   6   5   0    3.20    0.13 
  -6   5   0    3.17    0.13 
  -6   5   0    3.26    0.14 
   6  -5   0    3.40    0.15 
  -6  -5   0    3.13    0.12 
  -6  -5   0    3.03    0.14 
   6   5   1    2.10    0.11 
   6   5   1    2.15    0.08 
  -6   5  -1    2.17    0.12 
   6  -5   1    2.36    0.13 
   6  -5   1    2.27    0.11 
  -6  -5  -1    2.10    0.12 
  -6  -5  -1    2.33    0.10 
  -6   5  -2    0.07    0.05 
   6   5   2    0.07    0.03 
   6   5   2    0.03    0.04 
   6  -5   2    0.09    0.05 
   6  -5   2    0.04    0.05 
  -6  -5  -2   -0.02    0.05 
  -6  -5  -2    0.03    0.04 
  -6   5  -3    1.98    0.13 
   6   5   3    1.98    0.10 
   6   5   3    1.74    0.11 
   6  -5   3    1.76    0.12 
   6  -5   3    1.72    0.11 
  -6  -5  -3    1.73    0.12 
  -6  -5  -3    1.87    0.09 
  -6   5  -4    2.44    0.14 
   6   5   4    2.34    0.13 
   6   5   4    2.67    0.12 
  -6  -5  -4    2.26    0.14 
   6  -5   4    2.44    0.13 
   6  -5   4    2.43    0.13 
   6   5   5   -0.01    0.04 
   6   5   5    0.04    0.05 
  -6   5  -5    0.01    0.06 
  -6  -5  -5    0.02    0.06 
   6  -5   5    0.04    0.05 
   6  -5   5    0.01    0.05 
   6   5   6    0.12    0.06 
   6   5   6    0.06    0.06 
  -6   5  -6    0.13    0.07 
  -6  -5  -6    0.18    0.07 
   6  -5   6   -0.03    0.05 
   6  -5   6    0.12    0.06 
  -6   5  -7    0.35    0.08 
   6   5   7    0.40    0.08 
   6   5   7    0.35    0.08 
  -6  -5  -7    0.52    0.09 
   6  -5   7    0.34    0.08 
  -6   5  -8    1.72    0.15 
   6   5   8    1.89    0.14 
   6   5   8    1.75    0.15 
  -6  -5  -8    2.00    0.16 
   6  -5   8    1.58    0.14 
   6   5   9    2.56    0.18 
   6   5   9    2.90    0.17 
  -6   5  -9    2.74    0.18 
  -6  -5  -9    2.77    0.18 
   6  -5   9    2.77    0.18 
   6   5  10    0.82    0.12 
  -6   5 -10    1.00    0.13 
   6   5  10    0.99    0.12 
   6  -5  10    0.98    0.12 
  -6  -5 -10    1.04    0.13 
   6   5  11   -0.01    0.07 
  -6   5 -11    0.15    0.09 
  -6  -5 -11    0.14    0.10 
   6  -5  11    0.16    0.08 
  -6  -5 -11    0.20    0.10 
   6   5  12    1.12    0.14 
   6  -5  12    0.87    0.14 
  -6  -5 -12    0.87    0.14 
   6   5  13    0.03    0.09 
   6  -5  13   -0.05    0.08 
  -6  -5 -13    0.02    0.11 
   6   6 -15    0.06    0.14 
  -6   6  15    0.21    0.11 
   6  -6 -15    0.19    0.12 
  -6   6  14    2.50    0.20 
   6   6 -14    2.18    0.23 
  -6  -6  14    2.66    0.19 
   6  -6 -14    2.38    0.21 
  -6   6  13    0.15    0.09 
   6   6 -13   -0.05    0.11 
   6  -6 -13    0.10    0.09 
  -6  -6  13    0.12    0.08 
  -6   6  12   -0.05    0.07 
   6   6 -12   -0.06    0.10 
  -6  -6  12    0.09    0.08 
   6  -6 -12    0.03    0.08 
  -6   6  11    1.45    0.15 
  -6   6  11    1.98    0.14 
   6   6 -11    1.81    0.19 
   6  -6 -11    1.85    0.16 
  -6  -6  11    1.78    0.15 
   6   6 -10    0.11    0.09 
  -6   6  10    0.11    0.07 
  -6   6  10    0.14    0.06 
   6  -6 -10   -0.08    0.06 
  -6  -6  10    0.04    0.06 
   6   6  -9   -0.07    0.08 
  -6   6   9    0.01    0.05 
  -6   6   9   -0.08    0.06 
   6  -6  -9    0.03    0.06 
  -6  -6   9    0.05    0.06 
  -6   6   8    0.01    0.05 
   6   6  -8    0.08    0.09 
  -6   6   8    0.02    0.06 
   6  -6  -8   -0.01    0.07 
  -6  -6   8    0.02    0.06 
   6  -6  -8    0.01    0.06 
   6   6  -7    0.32    0.06 
   6   6  -7    0.35    0.09 
  -6   6   7    0.46    0.07 
  -6   6   7    0.22    0.06 
   6  -6  -7    0.31    0.08 
  -6  -6   7    0.32    0.07 
   6  -6  -7    0.29    0.07 
  -6   6   6    0.42    0.07 
   6   6  -6    0.57    0.07 
   6   6  -6    0.52    0.09 
  -6   6   6    0.58    0.07 
  -6  -6   6    0.44    0.08 
   6  -6  -6    0.39    0.08 
   6  -6  -6    0.53    0.07 
   6   6  -5    2.01    0.15 
   6   6  -5    1.87    0.11 
  -6   6   5    2.10    0.11 
  -6   6   5    1.93    0.12 
   6  -6  -5    2.10    0.10 
  -6  -6   5    2.03    0.13 
   6  -6  -5    1.96    0.14 
   6   6  -4    0.86    0.08 
   6   6  -4    0.75    0.09 
  -6   6   4    0.71    0.08 
  -6   6   4    0.81    0.09 
   6  -6  -4    0.65    0.09 
  -6  -6   4    0.98    0.10 
   6  -6  -4    0.71    0.07 
   6   6  -3    0.24    0.05 
  -6   6   3    0.19    0.06 
   6   6  -3    0.23    0.06 
  -6   6   3    0.23    0.06 
  -6  -6   3    0.33    0.06 
   6  -6  -3    0.29    0.04 
   6  -6  -3    0.17    0.06 
   6   6  -2    0.43    0.07 
  -6   6   2    0.44    0.07 
  -6   6   2    0.42    0.07 
   6   6  -2    0.35    0.06 
  -6  -6   2    0.36    0.06 
   6  -6  -2    0.37    0.07 
  -6   6   1    8.57    0.24 
   6   6  -1    8.57    0.24 
  -6   6   1    8.68    0.24 
  -6  -6   1    9.06    0.23 
   6  -6  -1    8.76    0.25 
  -6  -6   1    8.26    0.24 
  -6   6   0    0.29    0.06 
   6   6   0    0.15    0.05 
  -6   6   0    0.20    0.05 
   6  -6   0    0.13    0.06 
  -6  -6   0    0.25    0.06 
  -6  -6   0    0.17    0.06 
   6  -6   0    0.21    0.06 
  -6   6  -1    1.78    0.12 
   6   6   1    1.57    0.11 
  -6  -6  -1    1.87    0.13 
   6  -6   1    1.46    0.12 
  -6  -6  -1    1.63    0.10 
   6  -6   1    1.49    0.12 
   6   6   2   18.87    0.43 
  -6   6  -2   19.50    0.44 
   6  -6   2   19.55    0.42 
  -6  -6  -2   19.31    0.44 
  -6  -6  -2   20.32    0.39 
   6  -6   2   19.97    0.44 
  -6   6  -3    0.22    0.07 
   6   6   3    0.26    0.05 
   6   6   3    0.16    0.06 
   6  -6   3    0.36    0.07 
   6  -6   3    0.30    0.07 
  -6  -6  -3    0.30    0.05 
  -6  -6  -3    0.28    0.07 
   6   6   4    1.29    0.09 
   6   6   4    1.25    0.12 
  -6   6  -4    1.22    0.12 
   6  -6   4    1.25    0.11 
  -6  -6  -4    1.23    0.13 
   6  -6   4    1.22    0.11 
  -6   6  -5    0.75    0.10 
   6   6   5    1.01    0.09 
   6   6   5    0.86    0.10 
   6  -6   5    0.78    0.09 
  -6  -6  -5    0.84    0.10 
   6  -6   5    1.03    0.11 
  -6   6  -6    0.24    0.08 
   6   6   6    0.23    0.06 
   6   6   6    0.29    0.08 
  -6  -6  -6    0.23    0.08 
   6  -6   6    0.31    0.07 
   6  -6   6    0.21    0.07 
   6   6   7    0.02    0.05 
  -6   6  -7    0.16    0.07 
   6   6   7    0.03    0.06 
   6  -6   7    0.02    0.06 
   6  -6   7    0.00    0.06 
  -6  -6  -7    0.02    0.07 
  -6   6  -8    0.68    0.11 
   6   6   8    0.67    0.10 
   6   6   8    0.77    0.10 
   6  -6   8    0.68    0.10 
  -6  -6  -8    0.58    0.11 
   6   6   9    0.32    0.09 
  -6   6  -9    0.20    0.08 
   6   6   9    0.39    0.10 
   6  -6   9    0.27    0.08 
  -6  -6  -9    0.12    0.09 
   6   6  10    0.48    0.10 
   6   6  10    0.43    0.11 
  -6   6 -10    0.35    0.10 
   6  -6  10    0.26    0.09 
  -6  -6 -10    0.25    0.09 
   6   6  11    2.20    0.19 
   6   6  11    2.31    0.18 
  -6   6 -11    2.43    0.19 
   6  -6  11    2.33    0.19 
  -6  -6 -11    2.29    0.20 
   6   6  12    0.83    0.13 
   6  -6  12    0.71    0.12 
  -6  -6 -12    0.53    0.13 
   6   6  13   -0.02    0.09 
   6  -6  13   -0.05    0.08 
  -6   7  15    0.04    0.10 
   6  -7 -15    0.19    0.12 
  -6  -7  15    0.03    0.08 
  -6   7  14    0.92    0.14 
   6   7 -14    0.85    0.18 
  -6  -7  14    0.94    0.13 
   6  -7 -14    0.79    0.14 
  -6   7  13    0.12    0.09 
   6   7 -13    0.08    0.12 
   6  -7 -13    0.09    0.09 
  -6  -7  13   -0.05    0.07 
  -6   7  12    0.30    0.10 
   6   7 -12    0.39    0.13 
   6  -7 -12    0.38    0.10 
  -6  -7  12    0.35    0.10 
   6   7 -11    0.90    0.15 
  -6   7  11    1.17    0.13 
  -6   7  11    0.99    0.13 
   6  -7 -11    1.05    0.12 
  -6  -7  11    1.05    0.12 
  -6   7  10    0.09    0.08 
  -6   7  10    0.26    0.07 
   6   7 -10    0.11    0.10 
  -6  -7  10    0.28    0.08 
   6  -7 -10    0.22    0.08 
  -6   7   9    2.02    0.14 
   6   7  -9    1.73    0.17 
   6  -7  -9    1.87    0.14 
   6  -7  -9    2.13    0.17 
  -6  -7   9    1.48    0.14 
  -6   7   8    0.59    0.09 
   6   7  -8    0.61    0.11 
   6  -7  -8    0.72    0.09 
   6  -7  -8    0.72    0.11 
  -6  -7   8    0.70    0.10 
  -6   7   7    0.09    0.06 
   6   7  -7   -0.02    0.04 
   6   7  -7   -0.02    0.07 
  -6   7   7    0.02    0.06 
  -6  -7   7   -0.07    0.06 
   6  -7  -7   -0.09    0.06 
   6  -7  -7    0.07    0.06 
   6   7  -6    1.08    0.10 
  -6   7   6    1.00    0.11 
  -6   7   6    1.17    0.11 
   6   7  -6    1.30    0.14 
   6  -7  -6    0.94    0.11 
  -6  -7   6    1.11    0.12 
  -6   7   5    0.29    0.07 
   6   7  -5    0.28    0.08 
  -6   7   5    0.19    0.06 
   6   7  -5    0.16    0.06 
  -6  -7   5    0.26    0.07 
   6  -7  -5    0.06    0.07 
   6   7  -4    1.56    0.13 
   6   7  -4    1.00    0.10 
  -6   7   4    1.43    0.11 
  -6   7   4    1.58    0.12 
  -6  -7   4    1.20    0.12 
   6  -7  -4    1.37    0.13 
  -6   7   3    3.01    0.15 
   6   7  -3    3.39    0.16 
  -6   7   3    3.31    0.16 
   6   7  -3    3.27    0.15 
  -6  -7   3    3.35    0.16 
   6  -7  -3    3.47    0.16 
   6   7  -2    7.03    0.23 
   6   7  -2    6.43    0.21 
  -6   7   2    6.42    0.21 
  -6   7   2    6.46    0.22 
  -6  -7   2    6.63    0.21 
   6  -7  -2    6.99    0.23 
  -6   7   1    2.30    0.13 
   6   7  -1    2.34    0.13 
  -6   7   1    2.22    0.13 
   6   7  -1    2.09    0.13 
  -6  -7   1    1.85    0.12 
   6  -7  -1    2.03    0.14 
   6  -7  -1    2.39    0.15 
  -6   7   0    1.33    0.12 
   6   7   0    1.33    0.11 
  -6  -7   0    1.20    0.10 
  -6  -7   0    1.59    0.13 
   6  -7   0    1.48    0.13 
   6  -7   0    1.26    0.12 
  -6   7  -1    0.23    0.07 
   6   7   1    0.24    0.07 
  -6  -7  -1    0.32    0.08 
  -6  -7  -1    0.21    0.06 
   6  -7   1    0.18    0.07 
   6  -7   1    0.24    0.07 
   6   7   2    1.63    0.12 
  -6   7  -2    1.59    0.13 
  -6  -7  -2    1.57    0.14 
   6  -7   2    1.77    0.13 
  -6  -7  -2    1.94    0.11 
   6  -7   2    1.74    0.13 
  -6   7  -3   -0.04    0.06 
   6   7   3    0.02    0.06 
   6  -7   3    0.02    0.06 
  -6  -7  -3    0.00    0.05 
   6  -7   3   -0.03    0.05 
  -6  -7  -3   -0.03    0.06 
  -6   7  -4    2.85    0.16 
   6   7   4    2.56    0.16 
   6  -7   4    2.56    0.15 
   6  -7   4    2.58    0.15 
  -6  -7  -4    2.71    0.17 
   6   7   5    0.89    0.11 
  -6   7  -5    0.82    0.11 
   6  -7   5    0.98    0.11 
   6  -7   5    1.02    0.11
[truncated: 486,276 more chars]
